# Supplementary material for: Synthesis and kinetic resolution of substituted tetrahydroquinolines by lithiation then electrophilic quench
Source: PubMed Central journal article supplement (PMC5887238; doi:10.1039/c7sc04435f), 2017-12-14
Supplement: SC-009-C7SC04435F-s001.pdf [file SC-009-C7SC04435F-s001.pdf]

**Electronic Supplementary Information for:**

**Synthesis and Kinetic Resolution of Substituted Tetrahydroquinolines by  
Lithiation then Electrophilic Quench**

Nicholas Carter, Xiabing Li, Lewis Reavey, Anthony J. H. M. Meijer and Iain Coldham\*

*Department of Chemistry, University of Sheffield, Brook Hill, Sheffield, S3 7HF, UK*

**Contents**

|                                                                       |       |
|-----------------------------------------------------------------------|-------|
| 1. Experimental Procedures and Characterisation Data                  | S-2   |
| 1.1 Racemic lithiation–trapping                                       | S-2   |
| 1.2 Kinetic resolutions                                               | S-28  |
| 1.3 Lithiation-trapping of enantioenriched tetrahydroquinolines       | S-37  |
| 1.4 Removal of the Boc group                                          | S-44  |
| 2. ReactIR traces for lithiation of tetrahydroquinoline <b>2a</b>     | S-47  |
| 3. X-ray data for compound ( <i>R</i> )- <b>3a</b>                    | S-50  |
| 4. X-ray data for compound ( <i>R</i> )- <b>3g</b>                    | S-60  |
| 5. X-ray data for compound ( $\pm$ )- <b>10a</b>                      | S-71  |
| 6. X-ray data for compound ( <i>S</i> )- <b>11</b>                    | S-82  |
| 7. Variable temperature NMR spectra for tetrahydroquinoline <b>2a</b> | S-92  |
| 8. CSP-HPLC traces                                                    | S-95  |
| 9. <sup>1</sup> H and <sup>13</sup> C NMR spectra                     | S-110 |
| 10. References                                                        | S-136 |
| 11. DFT data                                                          | S-137 |

## 1. Experimental Procedures and Characterisation Data

### 1.1 Racemic lithiation–trapping

#### *(RS)*-*tert*-Butyl 2-Phenyl-1,2,3,4-tetrahydroquinoline-1-carboxylate **2a**

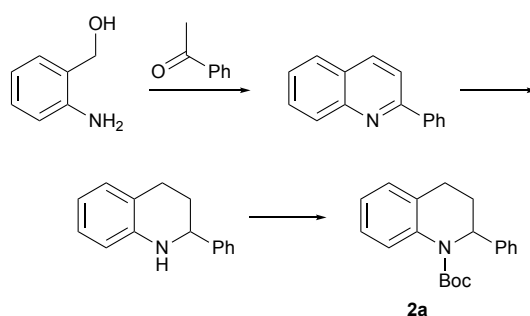

Potassium *tert*-butoxide (4.56 g, 40.6 mmol) was added to 2-aminobenzyl alcohol (5.00 g, 40.6 mmol), benzophenone (7.40 g, 40.6 mmol), and acetophenone (4.74 mL, 40.6 mmol) in THF (20 mL) and the resulting mixture was stirred at 90 °C for 16 h. The mixture was allowed to cool to room temperature and was filtered through Celite. The resulting solution was added to a saturated solution of NH<sub>4</sub>Cl (100 mL) and the aqueous layer was extracted with EtOAc (3 × 100 mL). The combined organic layers were dried (MgSO<sub>4</sub>), filtered, and evaporated. The residue was purified by column chromatography on silica gel, eluting with petrol–EtOAc (95:5) and then EtOAc (10 mL) and aqueous HCl (50 mL, 2 M) were added. The organic layer was extracted with aqueous HCl (2 × 50 mL) and the combined aqueous layers were basified with aqueous NaOH (2 M) to pH 13 to obtain a suspension that was extracted with EtOAc (3 × 100 mL). The combined organic layers were dried (MgSO<sub>4</sub>), filtered and evaporated to give 2-phenylquinoline (5.31 g, 64%) as an amorphous brown solid; m.p. 81–82 °C (lit.<sup>1</sup> 80–82 °C); <sup>1</sup>H NMR (400 MHz, CDCl<sub>3</sub>) δ = 8.26 (1H, d, *J* = 8.5 Hz, CH), 8.22–8.17

(3H, m, 3 × CH), 7.91 (1H, d,  $J = 8.5$  Hz, CH), 7.87–7.85 (1H, m, CH), 7.78–7.74 (1H, m, CH), 7.58–7.54 (3H, m, 3 × CH), 7.52–7.47 (1H, m, CH). Data consistent with the literature.<sup>1,2</sup>

Sodium cyanoborohydride (3.25 g, 51.7 mmol) was added to this quinoline (5.30 g, 25.8 mmol) and acetic acid (30 mL) at room temperature. After 16 h, the mixture was poured into saturated aqueous sodium carbonate and after allowing to stir for 15 min was extracted with CH<sub>2</sub>Cl<sub>2</sub> (3 × 50 mL). The combined organic layers were dried (MgSO<sub>4</sub>), filtered, and evaporated. The residue was purified by column chromatography on silica gel, eluting with petrol–EtOAc (97:3), to give 2-phenyl-1,2,3,4-tetrahydroquinoline (2.80 g, 52%) as an amorphous white solid; m.p. 37–38 °C (lit.<sup>3</sup> oil); <sup>1</sup>H NMR (400 MHz, CDCl<sub>3</sub>)  $\delta = 7.44$ – $7.35$  (4H, m, 4 × CH), 7.34–7.29 (1H, m, CH), 7.06 (2H, t,  $J = 7.0$  Hz, 2 × CH), 6.68 (1H, t,  $J = 7.0$  Hz, CH), 6.58 (1H, d,  $J = 8.0$  Hz, CH), 4.47 (1H, dd,  $J = 9.0, 3.0$  Hz, CH), 4.10 (1H, s, NH), 2.99–2.89 (1H, m, CH), 2.77 (1H, dt,  $J = 16.0, 5.0$  Hz, CH), 2.19–2.12 (1H, m, CH), 2.07–1.98 (1H, m, CH). Data consistent with the literature.<sup>3,4</sup>

*n*-BuLi (4.80 mL, 11.5 mmol, 2.4 M in hexanes) was added to the 2-phenyl-1,2,3,4-tetrahydroquinoline (1.51 g, 7.2 mmol) in THF (30 mL) at –78 °C. After 1 h, Boc<sub>2</sub>O (4.72 g, 21.6 mmol) in THF (30 mL) was added. The mixture was allowed to warm to room temperature over 16 h, was diluted with 10% sodium hydrogencarbonate solution and was extracted with Et<sub>2</sub>O (2 × 50 mL). The combined organic layers were dried (MgSO<sub>4</sub>), filtered, and evaporated. The residue was purified by column chromatography on silica gel, eluting with petrol–Et<sub>2</sub>O (98:2), to give the carbamate **2a** (1.85 g, 83%) as an amorphous solid; m.p. 55–57 °C;  $R_f$  0.27 [petrol–EtOAc (95:5)]; FT-IR  $\nu_{\max}$ (film)/cm<sup>-1</sup> 2970, 1705, 1490; <sup>1</sup>H NMR (400 MHz, CDCl<sub>3</sub>)  $\delta = 7.83$  (1H, d,  $J = 8.0$  Hz, CH), 7.32–7.24 (3H, m, 3 × CH), 7.24–7.18 (3H, m, 3 × CH), 7.10 (1H, d,

$J = 6.5$  Hz, CH), 7.06–7.00 (1H, m, CH), 5.37 (1H, t,  $J = 8.0$  Hz, CH), 2.74–2.59 (2H, m,  $2 \times$  CH), 2.50–2.41 (1H, m, CH), 1.91–1.80 (1H, m, CH), 1.37 (9H, s, *t*-Bu);  $^{13}\text{C}$  NMR (100 MHz,  $\text{CDCl}_3$ )  $\delta = 154.0$  (C=O), 144.5 (C), 138.2 (C), 132.5 (C), 128.3 (CH), 127.5 (CH), 126.5 (CH), 126.3 (CH), 125.8 (CH), 124.7 (CH), 123.4 (CH), 80.9 (C), 58.7 (CH), 33.5 ( $\text{CH}_2$ ), 28.2 ( $\text{CH}_3$ ), 26.3 ( $\text{CH}_2$ ); HRMS (ES) Found:  $\text{MH}^+$ , 310.1815.  $\text{C}_{20}\text{H}_{24}\text{NO}_2$  requires  $\text{MH}^+$ , 310.1807; LRMS  $m/z$  (ES) 310 (20%,  $\text{MH}^+$ ), 295 (100), 254 (90).

Resolution between the enantiomers of the carbamate **2a** was achieved using a Beckman system fitted with a Lux  $\times$  3u Cellulose–1 column (250 mm  $\times$  4.60 mm i.d.) as the stationary phase with a mixture of *n*-hexane–isopropanol (99:1 v/v) as the mobile phase at a flow rate of 1.0  $\text{mL}\cdot\text{min}^{-1}$ ; ambient temperature, detection by UV absorbance at 254 nm. Injection volume 20  $\mu\text{L}$  of the sample prepared in a 2  $\text{g}\cdot\text{L}^{-1}$  solution of the eluent. Under these conditions, components were eluted at 6.8 min and 12.8 min. Alternatively, resolution between the enantiomers of the carbamate **2a** was achieved using a Beckman system fitted with a Lux Cellulose–2 column (250 mm  $\times$  4.60 mm i.d.) as the stationary phase with a mixture of *n*-hexane–isopropanol (99:1 v/v) as the mobile phase at a flow rate of 1.0  $\text{mL}\cdot\text{min}^{-1}$ ; ambient temperature, detection by UV absorbance at 254 nm. Injection volume 20  $\mu\text{L}$  of the sample prepared in a 2  $\text{g}\cdot\text{L}^{-1}$  solution of the eluent. Under these conditions, the components were eluted at 5.3 min and 6.2 min.



**(*RS*)-*tert*-Butyl 2-Phenyl-1,2,3,4-tetrahydroquinoline-1-carboxylate (phenyl-d<sub>5</sub>) 2b**

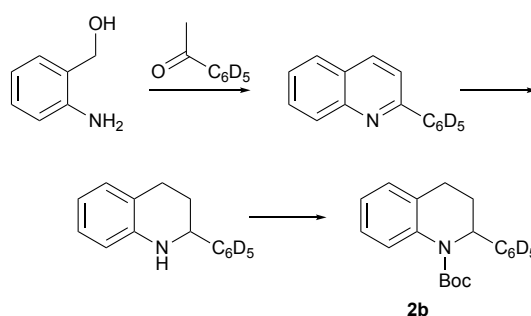

Acetyl chloride (6.02 mL, 84.7 mmol) in anhydrous CS<sub>2</sub> (5 mL) was added dropwise to d<sub>6</sub>-benzene (6.0 mL, 67.7 mmol) and AlCl<sub>3</sub> (11.3 g, 84.7 mmol) in anhydrous CS<sub>2</sub> (15 mL) at 0 °C. The mixture was allowed to warm to room temperature and was stirred for 5 h. The mixture was heated to 50 °C for 16 h. After cooling to room temperature, the mixture was poured into ice water (100 mL) and was extracted with CH<sub>2</sub>Cl<sub>2</sub> (2 × 50 mL). The combined organic layers were washed with saturated Na<sub>2</sub>CO<sub>3</sub> (20 mL) and brine (20 mL), dried (Na<sub>2</sub>SO<sub>4</sub>), filtered and the solvent was removed under reduced pressure. The mixture was purified using column chromatography on silica gel, eluting with petrol–EtOAc (95:5), to give acetophenone (phenyl-d<sub>5</sub>) (7.91g, 93%) as an oil; HRMS (GC/MS) Found: M<sup>+</sup>, 125.0883. C<sub>8</sub>H<sub>3</sub>D<sub>5</sub>O requires M<sup>+</sup>, 125.0884; Data consistent with the literature.<sup>5</sup>

Potassium *tert*-butoxide (40.9 mL, 40.6 mmol, 1.0 M in THF) was added to 2-aminobenzyl alcohol (5.04 g, 40.9 mmol), benzophenone (7.46 g, 40.9 mmol), and acetophenone (phenyl-d<sub>5</sub>) (4.77 mL, 40.9 mmol) in THF (20 mL) and the resulting mixture was stirred at 90 °C for 16 h. The mixture was allowed to cool to room temperature and was filtered through Celite. The resulting solution was added to a saturated solution of NH<sub>4</sub>Cl (100 mL) and the aqueous layer was extracted with EtOAc (3 × 100 mL). The combined organic layers were dried (MgSO<sub>4</sub>), filtered, and evaporated. The residue was purified by column chromatography on silica gel, eluting

with petrol–EtOAc (95:5) and then EtOAc (10 mL) and aqueous HCl (50 mL, 2 M) were added. The organic layer was extracted with aqueous HCl (2 × 50 mL) and the combined aqueous layers were basified with aqueous NaOH (2 M) to pH 13 to obtain a suspension that was extracted with EtOAc (3 × 100 mL). The combined organic layers were dried (MgSO<sub>4</sub>), filtered and evaporated to give 2-phenylquinoline (phenyl-d<sub>5</sub>) (7.4 g, 86%) as an amorphous yellow solid; m.p. 69–71 °C; R<sub>f</sub> 0.58 [petrol–EtOAc (9:1)]; <sup>1</sup>H NMR (400 MHz, CDCl<sub>3</sub>) δ = 8.25 (1H, d, *J* = 8.5 Hz, CH), 8.21 (1H, d, *J* = 8.5 Hz, CH), 7.88 (1H, d, *J* = 8.5 Hz, CH), 7.84 (1H, d, *J* = 8.5 Hz, CH), 7.81–7.73 (1H, m, CH), 7.59–7.52 (1H, m, CH); <sup>13</sup>C NMR (100 MHz, CDCl<sub>3</sub>, deuterated carbons could not be observed) δ = 157.4 (C), 148.3 (C), 139.5 (C), 136.8 (CH), 129.8 (CH), 129.7 (CH), 127.5 (CH), 127.2 (C), 126.3 (CH), 119.1 (CH); HRMS (ES) Found MH<sup>+</sup>, 211.1278. C<sub>15</sub>H<sub>7</sub>D<sub>5</sub>N requires MH<sup>+</sup>, 211.1278; LRMS *m/z* (ES) 211 (100%, MH<sup>+</sup>). No data reported.<sup>6</sup>

Sodium cyanoborohydride (4.33 g, 68.9 mmol) was added to this quinoline (7.23 g, 34.4 mmol) and acetic acid (100 mL) at room temperature. After 16 h, the mixture was poured into saturated aqueous sodium carbonate and after allowing to stir for 15 min was extracted with CH<sub>2</sub>Cl<sub>2</sub> (3 × 70 mL). The combined organic layers were dried (MgSO<sub>4</sub>), filtered, and evaporated. The residue was purified by column chromatography on silica gel, eluting with petrol–EtOAc (9:1), to give 2-phenyl-1,2,3,4-tetrahydroquinoline (phenyl-d<sub>5</sub>) (4.67 g, 63%) as an oil; R<sub>f</sub> 0.80 [petrol–EtOAc (9:1)]; FT-IR ν<sub>max</sub> (ATR)/cm<sup>-1</sup> 3390, 3050, 3015, 2920, 2840, 1605, 1585; <sup>1</sup>H NMR (400 MHz, CDCl<sub>3</sub>) δ = 7.13–7.05 (2H, m, 2 × CH), 6.74 (1H, td, *J* = 7.5, 1.0 Hz, CH), 6.64–6.58 (1H, m, CH), 4.51 (1H, dd, *J* = 9.5, 3.0 Hz, CH), 4.10 (1H, s, NH), 3.06–2.94 (1H, m, CH), 2.81 (1H, dt, *J* = 16.5, 5.0 Hz, CH), 2.25–2.15 (1H, m, CH), 2.14–2.00 (1H, m, CH); <sup>13</sup>C NMR (100 MHz, CDCl<sub>3</sub>, deuterated carbons could not all be

observed)  $\delta$  = 144.8 (C), 144.7 (C), 129.4 (CH), 128.1 (t,  $J$  = 24.0 Hz, CD), 127.0 (CH), 126.2 (t,  $J$  = 24.0 Hz, CD), 120.9 (C), 117.2 (CH), 114.0 (CH), 56.2 (CH), 31.1 (CH<sub>2</sub>), 26.4 (CH<sub>2</sub>); HRMS (ES) Found  $MH^+$ , 215.1595. C<sub>15</sub>H<sub>11</sub>D<sub>5</sub>N requires  $MH^+$ , 215.1591; LRMS  $m/z$  (ES) 215 (100%,  $MH^+$ ).

*n*-BuLi (1.57 mL, 3.77 mmol, 2.4 M in hexanes) was added to the 2-phenyl-1,2,3,4-tetrahydroquinoline (phenyl-d<sub>5</sub>) (0.5 g, 2.35 mmol) in THF (10 mL) at -78 °C. After 1 h, Boc<sub>2</sub>O (0.61 g, 2.82 mmol) in THF (10 mL) was added. The mixture was allowed to warm to room temperature over 16 h, was diluted with 10% sodium hydrogencarbonate solution and was extracted with Et<sub>2</sub>O (2 × 30 mL). The combined organic layers were dried (MgSO<sub>4</sub>), filtered, and evaporated. The residue was purified by column chromatography on silica gel, eluting with petrol–Et<sub>2</sub>O (97:3), to give the carbamate **2b** (0.56 g, 76%) as an amorphous solid; m.p. 57–58 °C; *R<sub>f</sub>* 0.59 [petrol–EtOAc (9:1)]; FT-IR  $\nu_{max}$ (film)/cm<sup>-1</sup> 3025, 3000, 2970, 2845, 1700, 1490; <sup>1</sup>H NMR (400 MHz, CDCl<sub>3</sub>)  $\delta$  = 7.86 (1H, d,  $J$  = 8.0 Hz, CH), 7.32–7.21 (1H, m, CH), 7.15–7.09 (1H, m, CH), 7.05 (1H, td,  $J$  = 7.5, 1.0 Hz, CH), 5.44–5.37 (1H, m, CH), 2.76–2.60 (2H, m, 2 × CH), 2.52–2.42 (1H, m, CH), 1.93–1.82 (1H, m, CH), 1.40 (9H, s, *t*-Bu); <sup>13</sup>C NMR (100 MHz, CDCl<sub>3</sub>, deuterated carbons could not all be observed)  $\delta$  = 154.1 (C=O), 144.4 (C), 138.2 (C), 132.5 (C), 127.8 (t,  $J$  = 24.0 Hz, CD), 127.5 (CH), 126.3 (CH), 125.4 (t,  $J$  = 24.0 Hz, CD), 124.7 (CH), 123.4 (CH), 80.9 (C), 58.6 (CH), 33.5 (CH<sub>2</sub>), 28.2 (CH<sub>3</sub>), 26.3 (CH<sub>2</sub>); HRMS (ES) Found:  $MNa^+$ , 337.1935. C<sub>20</sub>H<sub>18</sub>D<sub>5</sub>NO<sub>2</sub>Na requires  $MNa^+$ , 337.1935; LRMS  $m/z$  (ES) 337 (5%), 259 (100).

**(*RS*)-*tert*-Butyl 6-Chloro-2-phenyl-1,2,3,4-tetrahydroquinoline-1-carboxylate 2c**

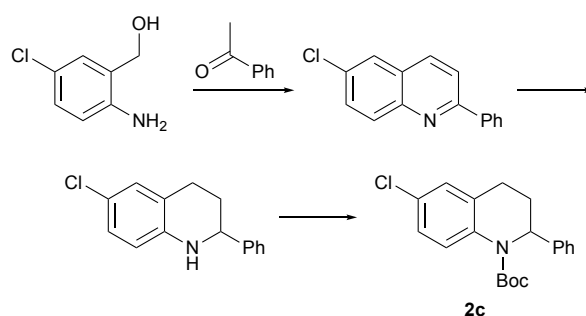

Potassium *tert*-butoxide (32.4 mL, 32.4 mmol, 1.0 M in THF) was added to 2-amino-5-chlorobenzyl alcohol (5.12 g, 32.4 mmol), benzophenone (5.90 g, 32.4 mmol), and acetophenone (3.79 mL, 32.4 mmol) in THF (20 mL) and the resulting mixture was stirred at 90 °C for 16 h. The mixture was allowed to cool to room temperature and was filtered through Celite. The resulting solution was added to a saturated solution of NH<sub>4</sub>Cl (100 mL) and the aqueous layer was extracted with EtOAc (3 × 100 mL). The combined organic layers were dried (MgSO<sub>4</sub>), filtered, and evaporated. The residue was purified by column chromatography on silica gel, eluting with petrol–EtOAc (9:1) and then EtOAc (10 mL) and aqueous HCl (50 mL, 2 M) were added. The organic layer was extracted with aqueous HCl (2 × 50 mL) and the combined aqueous layers were basified with aqueous NaOH (2 M) to pH 13 to obtain a suspension that was extracted with EtOAc (3 × 100 mL). The combined organic layers were dried (MgSO<sub>4</sub>), filtered and evaporated to give 6-chloro-2-phenylquinoline (6.20 g, 65%) as a solid; m.p. 102–104 °C (lit.<sup>7</sup> 110–111 °C); <sup>1</sup>H NMR (400 MHz, CDCl<sub>3</sub>) δ = 8.18–8.12 (4H, m, 4 × CH), 7.91 (1H, d, *J* 8.5 Hz, CH), 7.82 (1H, d, *J* 2.5 Hz, CH), 7.68 (1H, dd, *J* 9.0, 2.5 Hz, CH), 7.58–7.48 (3H, m, 3 × CH). Data consistent with the literature.<sup>7</sup>

Sodium cyanoborohydride (3.16 g, 50.4 mmol) was added to this quinoline (6.02 g, 25.2 mmol) and acetic acid (150 mL) at room temperature. After 16 h, the mixture was

poured into saturated aqueous sodium carbonate and after allowing to stir for 15 min was extracted with CH<sub>2</sub>Cl<sub>2</sub> (3 × 50 mL). The combined organic layers were dried (MgSO<sub>4</sub>), filtered, and evaporated to give 6-chloro-2-phenyl-1,2,3,4-tetrahydroquinoline (4.90 g, 80%) as an oil; <sup>1</sup>H NMR (400 MHz, CDCl<sub>3</sub>) δ = 7.40–7.30 (5H, m, 5 × CH), 7.00–6.97 (2H, m, 2 × CH), 6.49 (1H, d, *J* 8.0 Hz, CH), 4.45 (1H, dd, *J* 9.5, 3.5 Hz, CH), 4.09 (1H, s, NH), 2.95–2.86 (1H, m, CH), 2.73 (1H, dt, *J* 16.5, 5.0 Hz, CH), 2.17–2.10 (1H, m, CH), 2.04–1.94 (1H, m, CH). Data consistent with the literature.<sup>8</sup>

*n*-BuLi (1.37 mL, 3.3 mmol, 2.4 M in hexanes) was added to the 6-chloro-2-phenyl-1,2,3,4-tetrahydroquinoline (0.5 g, 2.05 mmol) in THF (15 mL) at –78 °C. After 20 min, 2-(Boc-oxyimino)-2-phenylacetonitrile (0.92 g, 3.74 mmol) was added. The mixture was allowed to warm to room temperature over 16 h, was diluted with 20% sodium hydrogencarbonate solution (10 mL) and was extracted with Et<sub>2</sub>O (2 × 100 mL). The combined organic layers were dried (MgSO<sub>4</sub>), filtered, and evaporated. The residue was purified by column chromatography on silica gel, eluting with petrol–Et<sub>2</sub>O (97:3), to give the carbamate **2c** (0.44 g, 68%) as an amorphous solid; m.p. 77–80 °C; *R*<sub>f</sub> 0.55 [petrol–EtOAc (9:1)]; FT-IR *v*<sub>max</sub>(film)/cm<sup>-1</sup> 3025, 2955, 1705, 1490; <sup>1</sup>H NMR (400 MHz, CDCl<sub>3</sub>) δ = 7.80 (1H, d, *J* = 9.0 Hz, CH), 7.33–7.26 (2H, m, 2 × CH), 7.25–7.15 (4H, m, 4 × CH), 7.09 (1H, d, *J* = 2.5 Hz, CH), 5.38 (1H, t, *J* = 7.0 Hz, CH), 2.70–2.57 (2H, m, 2 × CH), 2.46–2.38 (1H, m, CH), 1.92–1.83 (1H, m, CH), 1.36 (9H, s, *t*-Bu); <sup>13</sup>C NMR (100 MHz, CDCl<sub>3</sub>) δ = 154.0 (C=O), 143.9 (C), 136.8 (C), 133.8 (C), 128.4 (CH), 128.3 (C), 127.4 (CH), 126.7 (CH), 126.3 (CH), 125.8 (CH), 125.7 (CH), 81.3 (C), 58.4 (CH), 32.8 (CH<sub>2</sub>), 28.1 (CH<sub>3</sub>), 26.0 (CH<sub>2</sub>); HRMS (ES) Found MNa<sup>+</sup>, 366.1233. C<sub>20</sub>H<sub>22</sub><sup>35</sup>ClNaNO<sub>2</sub> requires MNa<sup>+</sup>, 366.1231; Found MNa<sup>+</sup>,

368.1207.  $C_{20}H_{22}^{37}ClNaNO_2$  requires  $MNa^+$ , 368.1209; LRMS  $m/z$  (ES) 368 (<5%), 366 (5) 290 (30), 288 (100).

Resolution between the enantiomers of the carbamate **2c** was achieved using a Beckman system fitted with a Lux Cellulose-2 column (250 mm  $\times$  4.60 mm i.d.) as the stationary phase with a mixture of *n*-hexane–isopropanol (99:1 v/v) as the mobile phase at a flow rate of 1.0 mL $\cdot$ min $^{-1}$ ; ambient temperature, detection by UV absorbance at 254 nm. Injection volume 20  $\mu$ L of the sample prepared in a 2 g $\cdot$ L $^{-1}$  solution of the eluent. Under these conditions, the components were eluted at 4.6 min and 5.6 min.

**(*RS*)-*tert*-Butyl 2-(4-Fluorophenyl)-1,2,3,4-tetrahydroquinoline-1-carboxylate 2d**

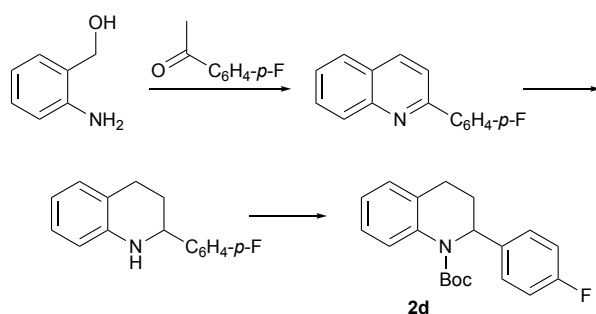

Potassium *tert*-butoxide (9.11 g, 81.2 mmol) was added to 2-aminobenzyl alcohol (5.00 g, 40.6 mmol), benzophenone (7.40 g, 40.6 mmol), and *p*-fluoro-acetophenone (4.93 mL, 40.6 mmol) in THF (20 mL) and the resulting mixture was stirred at 90 °C for 16 h. The mixture was allowed to cool to room temperature and was filtered through Celite. The resulting solution was added to a saturated solution of  $NH_4Cl$  (100 mL) and the aqueous layer was extracted with EtOAc (3  $\times$  100 mL). The combined organic layers were dried ( $MgSO_4$ ), filtered, and evaporated. The residue was purified by column chromatography on silica gel, eluting with petrol–EtOAc (95:5) and then EtOAc (10 mL) and aqueous HCl (50 mL, 2 M) were added. The organic layer was

extracted with aqueous HCl (2 × 50 mL) and the combined aqueous layers were basified with aqueous NaOH (2 M) to pH 13 to obtain a suspension that was extracted with EtOAc (3 × 100 mL). The combined organic layers were dried (MgSO<sub>4</sub>), filtered and evaporated to give 2-(4-fluorophenyl)quinoline (3.64 g, 40%) as a solid; m.p. 84–85 °C (lit.<sup>9</sup> 92–93 °C); <sup>1</sup>H NMR (400 MHz, CDCl<sub>3</sub>) δ = 8.31–8.16 (4H, m, 4 × CH), 7.87 (2H, d, *J* = 8.5 Hz, 2 × CH), 7.80–7.75 (1H, m, CH), 7.60–7.55 (1H, m, CH), 7.27–7.21 (2H, m, 2 × CH). Data consistent with the literature.<sup>9</sup>

Sodium cyanoborohydride (0.60 g, 9.6 mmol) was added to this quinoline (1.00 g, 4.48 mmol) and acetic acid (15 mL) at room temperature. After 16 h, the mixture was poured into saturated aqueous sodium carbonate and after allowing to stir for 15 min was extracted with CH<sub>2</sub>Cl<sub>2</sub> (3 × 30 mL). The combined organic layers were dried (MgSO<sub>4</sub>), filtered, and evaporated to give 2-(4-fluorophenyl)-1,2,3,4-tetrahydroquinoline (0.89 g, 88%) as an oil; <sup>1</sup>H NMR (400 MHz, CDCl<sub>3</sub>) δ = 7.43–7.36 (2H, m, 2 × CH), 7.11–7.02 (4H, m, 4 × CH), 6.71 (1H, td, *J* = 7.5, 1.0 Hz, CH), 6.58 (1H, d, *J* = 7.5 Hz, CH), 4.46 (1H, dd, *J* = 9.5, 3.0 Hz, CH), 4.05 (1H, s, NH), 3.02–2.91 (1H, m, CH), 2.77 (1H, dt, *J* = 16.5, 4.5 Hz, CH), 2.17–2.09 (1H, m, CH), 2.05–1.94 (1H, m, CH). Data consistent with the literature.<sup>3</sup>

*n*-BuLi (2.64 mL, 6.34 mmol, 2.4 M in hexanes) was added to 2-(4-fluorophenyl)-1,2,3,4-tetrahydroquinoline (0.90 g, 3.96 mmol) in THF (15 mL) at –78 °C. After 1 h, Boc<sub>2</sub>O (2.59 g, 11.9 mmol) in THF (45 mL) was added. The mixture was allowed to warm to room temperature over 16 h, was diluted with 10% sodium hydrogencarbonate solution and was extracted with Et<sub>2</sub>O (3 × 50 mL). The combined organic layers were dried (MgSO<sub>4</sub>), filtered, and evaporated. The residue was purified by column chromatography on silica gel, eluting with petrol–Et<sub>2</sub>O (95:5), to give the carbamate **2d** (1.06 g, 82%) as an amorphous solid; m.p. 79–80 °C; *R*<sub>f</sub> 0.36 [petrol–EtOAc

(95:5)]; FT-IR  $\nu_{\max}(\text{film})/\text{cm}^{-1}$  3075, 3040, 3005, 2975, 2930, 1700, 1510, 1485;  $^1\text{H}$  NMR (400 MHz,  $\text{CDCl}_3$ )  $\delta$  = 7.89 (1H, d,  $J$  = 7.5 Hz, CH), 7.30 (1H, t,  $J$  = 7.5 Hz, CH), 7.27–7.19 (2H, m, 2  $\times$  CH), 7.17–7.11 (1H, m, CH), 7.10–7.04 (1H, m, CH), 7.04–6.93 (2H, m, 2  $\times$  CH), 5.42 (1H, t,  $J$  = 7.5 Hz, CH), 2.77–2.58 (2H, m, 2  $\times$  CH), 2.52–2.40 (1H, m, CH), 1.91–1.77 (1H, m, CH), 1.45 (9H, s, *t*-Bu);  $^{13}\text{C}$  NMR (100 MHz,  $\text{CDCl}_3$ )  $\delta$  = 161.6 (d,  $J$  = 244.0 Hz, C), 154.0 (C=O), 140.4 (d,  $J$  = 2.5 Hz, C), 138.0 (C), 132.4 (C), 127.6 (CH), 127.4 (d,  $J$  = 8.0 Hz, CH), 126.4 (CH), 124.8 (CH), 123.6 (CH), 115.2 (d,  $J$  = 21.5 Hz, CH), 81.0 (C), 58.1 (CH), 33.6 ( $\text{CH}_2$ ), 28.2 ( $\text{CH}_3$ ), 26.2 ( $\text{CH}_2$ );  $^{19}\text{F}$  NMR (377 MHz,  $\text{CDCl}_3$ )  $\delta$  = 116.6; HRMS (ES) Found:  $\text{MH}^+$ , 328.1713.  $\text{C}_{20}\text{H}_{23}\text{NO}_2\text{F}$  requires  $\text{MH}^+$ , 328.1713; LRMS  $m/z$  (ES) 328 (5%), 313 (90), 272 (100); Found: C, 73.62; H, 6.99; N, 4.11.  $\text{C}_{20}\text{H}_{22}\text{FNO}_2$  requires C, 73.37; H, 6.77; N, 4.28.

Resolution between the enantiomers of the carbamate **2d** was achieved using a Beckman system fitted with a Lux Cellulose–2 column (250 mm  $\times$  4.60 mm i.d.) as the stationary phase with a mixture of *n*-hexane–isopropanol (99:1 v/v) as the mobile phase at a flow rate of 1.0  $\text{mL}\cdot\text{min}^{-1}$ ; ambient temperature, detection by UV absorbance at 254 nm. Injection volume 20  $\mu\text{L}$  of the sample prepared in a 2  $\text{g}\cdot\text{L}^{-1}$  solution of the eluent. Under these conditions, the components were eluted at 4.9 min and 5.9 min.



**(*RS*)-*tert*-Butyl 2-(Naphthalen-2-yl)-1,2,3,4-tetrahydroquinoline-1-carboxylate 2e**

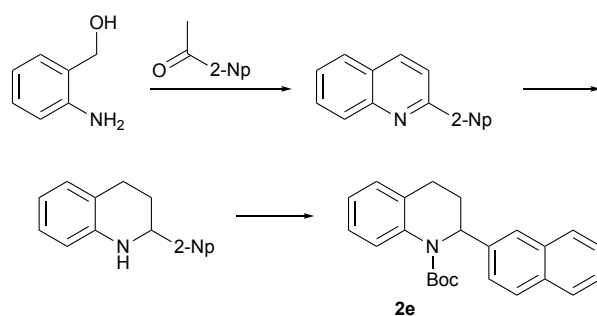

Potassium *tert*-butoxide (41.0 mL, 41.0 mmol, 1.0 M in THF) was added to 2-aminobenzyl alcohol (5.05 g, 41.0 mmol), benzophenone (7.48 g, 41.0 mmol), and 2-acetylnaphthalene (6.98 g, 41.0 mmol) in THF (20 mL) and the resulting mixture was stirred at 90 °C for 16 h. The mixture was allowed to cool to room temperature and was filtered through Celite. The resulting solution was added to a saturated solution of NH<sub>4</sub>Cl (100 mL) and the aqueous layer was extracted with EtOAc (3 × 100 mL). The combined organic layers were dried (MgSO<sub>4</sub>), filtered, and evaporated. The residue was purified by column chromatography on silica gel, eluting with petrol–EtOAc (9:1) and then EtOAc (10 mL) and aqueous HCl (50 mL, 2 M) were added. The organic layer was extracted with aqueous HCl (2 × 50 mL) and the combined aqueous layers were basified with aqueous NaOH (2 M) to pH 13 to obtain a suspension that was extracted with EtOAc (3 × 100 mL). The combined organic layers were dried (MgSO<sub>4</sub>), filtered and evaporated to give 2-(naphthalen-2-yl)quinoline (8.43 g, 80%) as a solid; m.p. 143–145 °C (lit.<sup>10</sup> 150 °C); <sup>1</sup>H NMR (400 MHz, CDCl<sub>3</sub>) δ = 8.65 (1H, s, CH), 8.45–8.38 (1H, m, CH), 8.29 (1H, d, *J* = 8.5 Hz, CH), 8.25 (1H, d, *J* = 8.5 Hz, CH), 8.07–7.99 (3H, m, 3 × CH), 7.97–7.90 (1H, m, CH), 7.86 (1H, d, *J* = 8.0 Hz, CH), 7.79 (1H, t, *J* = 8.0 Hz, CH), 7.61–7.53 (3H, m, 3 × CH). Data consistent with the literature.<sup>10</sup>

Sodium cyanoborohydride (4.07 g, 64.8 mmol) was added to this quinoline (8.26 g, 32.4 mmol) and acetic acid (300 mL) at room temperature. After 16 h, the mixture was poured into saturated aqueous sodium carbonate and after allowing to stir for 15 min was extracted with CH<sub>2</sub>Cl<sub>2</sub> (3 × 100 mL). The combined organic layers were dried (MgSO<sub>4</sub>), filtered, and evaporated. The residue was purified by column chromatography on silica gel, eluting with petrol–EtOAc (9:1), to give 2-naphthyl-1,2,3,4-tetrahydroquinoline (5.48 g, 65%) as an amorphous solid; m.p. 79–81 °C (no lit. melting point reported); <sup>1</sup>H NMR (400 MHz, CDCl<sub>3</sub>) δ = 7.93–7.85 (4H, m, 4 × CH), 7.60–7.50 (3H, m, 3 × CH), 7.14–7.06 (2H, m, 2 × CH), 6.75 (1H, td, *J* = 7.5, 1.0 Hz, CH), 6.66–6.62 (1H, m, CH), 4.65 (1H, dd, *J* = 9.5, 3.0 Hz, CH), 4.18 (1H, s, NH), 3.07–2.96 (1H, m, CH), 2.82 (1H, dt, *J* = 16.5, 5.0 Hz, CH), 2.29–2.20 (1H, m, CH), 2.20–2.08 (1H, m, CH). Data consistent with the literature.<sup>4</sup>

*n*-BuLi (2.73 mL, 6.27 mmol, 2.3 M in hexanes) was added to 2-naphthyl-1,2,3,4-tetrahydroquinoline (1.02 g, 3.92 mmol) in THF (20 mL) at –78 °C. After 20 min, Boc<sub>2</sub>O (1.45 g, 6.66 mmol) in THF (10 mL) was added. The mixture was allowed to warm to room temperature over 16 h, was diluted with 10% sodium hydrogencarbonate solution and was extracted with Et<sub>2</sub>O (3 × 50 mL). The combined organic layers were dried (MgSO<sub>4</sub>), filtered, and evaporated. The residue was purified by column chromatography on silica gel, eluting with petrol–Et<sub>2</sub>O (97:3), to give the carbamate **2e** (0.92 g, 65%) as an amorphous solid; m.p. 93–94 °C; R<sub>f</sub> 0.49 [petrol–EtOAc (9:1)]; FT-IR ν<sub>max</sub>(film)/cm<sup>-1</sup> 3055, 3005, 2975, 2930, 2870, 2845, 1695, 1490; <sup>1</sup>H NMR (400 MHz, CDCl<sub>3</sub>) δ = 7.90 (1H, d, *J* = 8.0 Hz, CH), 7.85–7.74 (3H, m, 3 × CH), 7.68 (1H, s, CH), 7.51–7.42 (2H, m, 2 × CH), 7.35 (1H, dd, *J* = 8.5, 2.0 Hz, CH), 7.33–7.28 (1H, m, CH), 7.13 (1H, m, CH), 7.13 (1H, dd, *J* = 7.5, 1.0 Hz, CH), 7.07 (1H, td, *J* = 7.5, 1.0 Hz, CH), 5.59–5.52 (1H, m, CH), 2.80–2.62 (2H, m, 2 × CH), 2.58–2.46 (1H, m,

CH), 2.03–1.90 (1H, m, CH), 1.36 (9H, s, *t*-Bu);  $^{13}\text{C}$  NMR (100 MHz,  $\text{CDCl}_3$ )  $\delta$  = 154.1 (C=O), 141.9 (C), 138.2 (C), 133.3 (C), 132.5 (C), 132.4 (C), 128.2 (CH), 127.8 (CH), 127.6 (CH), 127.5 (CH), 126.4 (CH), 126.0 (CH), 125.5 (CH), 124.8 (CH), 124.4 (CH), 124.3 (CH), 123.5 (CH), 81.0 (C), 58.8 (CH), 33.5 ( $\text{CH}_2$ ), 28.2 ( $\text{CH}_3$ ), 26.4 ( $\text{CH}_2$ ); HRMS (ES) Found:  $\text{MNa}^+$ , 382.1785.  $\text{C}_{24}\text{H}_{25}\text{NO}_2\text{Na}$  requires  $\text{MNa}^+$ , 382.1778; LRMS  $m/z$  (ES) 382 (25%,  $\text{MNa}^+$ ), 304 (90,  $\text{MH}^+ - t\text{-Bu} + \text{H}$ ), 176 (100).

Resolution between the enantiomers of the carbamate **2e** was achieved using a Beckman system fitted with a Lux Cellulose–2 column (250 mm  $\times$  4.60 mm i.d.) as the stationary phase with a mixture of *n*-hexane–isopropanol (99:1 v/v) as the mobile phase at a flow rate of 1.0  $\text{mL}\cdot\text{min}^{-1}$ ; ambient temperature, detection by UV absorbance at 254 nm. Injection volume 20  $\mu\text{L}$  of the sample prepared in a 2  $\text{g}\cdot\text{L}^{-1}$  solution of the eluent. Under these conditions, the components were eluted at 5.8 min and 8.8 min.

### **(*RS*)-*tert*-Butyl 2-Methyl 2-Phenyl-1,2,3,4-tetrahydroquinoline-1,2-dicarboxylate**

#### **3a**

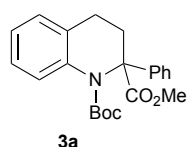

*n*-BuLi (0.15 mL, 0.38 mmol, 2.5 M in hexanes) was added dropwise to the carbamate **2a** (100 mg, 0.32 mmol) in THF (1.3 mL) at  $-78$   $^{\circ}\text{C}$ . After 6 min, methyl chloroformate (0.09 mL, 1.13 mmol) was added. The mixture was allowed to warm to room temperature over 16 h then MeOH (1 mL) was added. The solvent was evaporated and the residue was purified by column chromatography on silica gel, eluting with petrol–EtOAc (95:5), to give the carbamate **3a** (108 mg, 90%) as an amorphous solid; m.p. 104–106  $^{\circ}\text{C}$ ;  $R_f$  0.12 [petrol–EtOAc (95:5)]; FT-IR  $\nu_{\text{max}}$

(film)/cm<sup>-1</sup> 3030, 2975, 2945, 2930, 1750, 1700, 1490; <sup>1</sup>H NMR (400 MHz, CDCl<sub>3</sub>) δ = 7.90 (1H, d, *J* = 8.0 Hz, CH), 7.65–7.59 (2H, m, 2 × CH), 7.36–7.30 (2H, m, 2 × CH), 7.28–7.21 (2H, m, 2 × CH), 7.09–7.04 (1H, m, CH), 7.01 (1H, td, *J* = 7.5, 1.0 Hz, CH), 3.80 (3H, s, CH<sub>3</sub>), 2.88–2.79 (1H, m, CH), 2.60–2.53 (1H, m, CH), 2.52–2.44 (1H, m, CH), 2.21–2.12 (1H, m, CH), 1.31 (9H, s, *t*-Bu); <sup>13</sup>C NMR (100 MHz, CDCl<sub>3</sub>) δ = 173.5 (C=O), 153.8 (C=O), 142.3 (C), 137.7 (C), 131.7 (C), 127.7 (CH), 127.6 (CH), 126.8 (CH), 126.7 (CH), 126.5 (CH), 124.4 (CH), 123.4 (CH), 82.1 (C), 68.7 (C), 52.4 (CH<sub>3</sub>), 39.4 (CH<sub>2</sub>), 27.9 (CH<sub>3</sub>), 25.2 (CH<sub>2</sub>); HRMS (ES) Found: MH<sup>+</sup>, 368.1865. C<sub>22</sub>H<sub>26</sub>NO<sub>4</sub> requires MH<sup>+</sup>, 368.1862; LRMS *m/z* (ES) 368 (20%), 312 (20), 268 (100); Found: C, 72.02; H, 6.74; N, 3.66. C<sub>22</sub>H<sub>25</sub>NO<sub>4</sub> requires C, 71.91; H, 6.86; N, 3.81.

Resolution between the enantiomers of the carbamate **3a** was achieved using a Beckman system fitted with a Chiralpak IA column (250 mm × 4.60 mm i.d.) as the stationary phase with a mixture of *n*-hexane–isopropanol (99:1 v/v) as the mobile phase at a flow rate of 1.0 mL·min<sup>-1</sup>; ambient temperature, detection by UV absorbance at 254 nm. Injection volume 20 μL of the sample prepared in a 2 g·L<sup>-1</sup> solution of the eluent. Under these conditions, the components were eluted at 13.5 min and 21 min.

Alternatively, to test for the effect of cyanide on the regiochemistry: *n*-BuLi (0.16 mL, 0.38 mmol, 2.4 M in hexanes) was added to the carbamate **2a** (100 mg, 0.32 mmol) and NaCN (20 mg, 0.32 mmol) in THF (4 mL) at –78 °C. After 6 min, MeOCOCN (0.08 mL, 1 mmol) was added. The mixture was allowed to warm to room temperature over 16 h then MeOH (1 mL) was added. The solvent was evaporated and the residue was purified by column chromatography on silica gel, eluting with petrol–EtOAc (96:4), to give the carbamate **3a** (98 mg, 83%); data as above.

**(*RS*)-tert-Butyl 2-Ethyl 2-Phenyl-1,2,3,4-tetrahydroquinoline-1,2-dicarboxylate **3b****

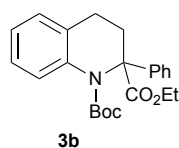

*n*-BuLi (0.15 mL, 0.38 mmol, 2.5 M in hexanes) was added dropwise to the carbamate **2a** (100 mg, 0.32 mmol) in THF (1.3 mL) at  $-78\text{ }^{\circ}\text{C}$ . After 6 min, ethyl chloroformate (0.09 mL, 1.13 mmol) was added. The mixture was allowed to warm to room temperature over 16 h then MeOH (1 mL) was added. The solvent was evaporated and the residue was purified by column chromatography on silica gel, eluting with petrol–EtOAc (95:5), to give the carbamate **3b** (87 mg, 71%) as an oil;  $R_f$  0.3 [petrol–EtOAc (95:5)]; FI-IR  $\nu_{\text{max}}$  (film)/ $\text{cm}^{-1}$  2975, 2915, 2850, 1740, 1710;  $^1\text{H}$  NMR (400 MHz,  $\text{CDCl}_3$ )  $\delta$  = 7.88 (1H, d,  $J$  8.0 Hz, CH), 7.63 (2H, d,  $J$  7.5 Hz, 2  $\times$  CH), 7.35–7.00 (6H, m, 6  $\times$  CH), 4.34–4.20 (2H, m,  $\text{CH}_2$ ), 2.87 (1H, ddd,  $J$  14.5, 10.0, 3.0 Hz, CH), 2.61–2.46 (1H, m, CH), 2.53–2.46 (1H, m, CH), 2.20–2.14 (1H, m, CH), 1.33 (9H, s, *t*-Bu), 1.33 (3H, t,  $J$  7.0 Hz,  $\text{CH}_3$ );  $^{13}\text{C}$  NMR (100 MHz,  $\text{CDCl}_3$ )  $\delta$  = 172.8 (C=O), 153.8 (C=O), 142.4 (C), 137.8 (C), 131.9 (C), 127.7 (2  $\times$  CH), 127.5 (CH), 126.8 (CH), 126.4 (CH), 124.4 (CH), 123.4 (CH), 82.0 (C), 68.6 (C), 61.5 ( $\text{CH}_2$ ), 39.6 ( $\text{CH}_2$ ), 27.9 ( $\text{CH}_3$ ), 25.2 ( $\text{CH}_2$ ), 14.2 ( $\text{CH}_3$ ); HRMS (ES) Found:  $\text{MH}^+$ , 382.2001.  $\text{C}_{23}\text{H}_{28}\text{NO}_4$  requires  $\text{MH}^+$ , 382.2018. LRMS  $m/z$  (ES) 382 (40%), 282 (100).

Resolution between the enantiomers of the carbamate **3b** was achieved using a Beckman system fitted with a Lux  $\times$  3u Cellulose–1 column (250 mm  $\times$  4.60 mm i.d.) as the stationary phase with a mixture of *n*-hexane–isopropanol (99.5:0.5 v/v) as the mobile phase at a flow rate of  $1.0\text{ mL}\cdot\text{min}^{-1}$ ; ambient temperature, detection by UV absorbance at 254 nm. Injection volume 20  $\mu\text{L}$  of the sample prepared in a  $2\text{ g}\cdot\text{L}^{-1}$

solution of the eluent. Under these conditions, the components were eluted at 11.5 min and 12.5 min.

**(*RS*)-*tert*-Butyl 2-Phenyl-1,2,3,4-tetrahydro(2-<sup>2</sup>H)quinoline-1-carboxylate **3c****

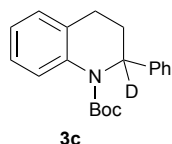

*n*-BuLi (0.09 mL, 0.21 mmol, 2.4 M in hexanes) was added dropwise to the carbamate **2a** (53 mg, 0.17 mmol) in THF (1 mL) at  $-78$  °C. After 6 min, deuterium oxide (0.3 mL) was added and the mixture was allowed to warm to room temperature over 16 h. The solvent was evaporated and the residue was purified by column chromatography on silica gel, eluting with petrol–EtOAc (95:5), to give the carbamate **3c** (41 mg, 76%, ~95%D) as an amorphous solid; m.p. 56–58 °C;  $R_f$  0.33 [petrol–EtOAc (95:5)]; FT-IR  $\nu_{\max}$  (film)/ $\text{cm}^{-1}$  3060, 3025, 2975, 2930, 1695, 1605;  $^1\text{H}$  NMR (400 MHz,  $\text{CDCl}_3$ )  $\delta$  = 7.85 (1H, d,  $J$  = 8.0 Hz, CH), 7.33–7.19 (6H, m, 6  $\times$  CH), 7.11 (1H, d,  $J$  = 6.5 Hz, CH), 7.05 (1H, td,  $J$  = 7.5, 1.0 Hz, CH), 5.38 (0.05H for compound **2a**, t,  $J$  = 8.0 Hz, CH), 2.75–2.59 (2H, m, 2  $\times$  CH), 2.50–2.41 (1H, m, CH), 1.91–1.81 (1H, m, CH), 1.38 (9H, s, *t*-Bu);  $^{13}\text{C}$  NMR (100 MHz,  $\text{CDCl}_3$ )  $\delta$  = 154.0 (C=O), 144.5 (C), 138.2 (C), 132.5 (C), 128.3 (CH), 127.5 (CH), 126.5 (CH), 126.3 (CH), 125.8 (CH), 124.7 (CH), 123.4 (CH), 80.9 (C), 58.3 (t,  $J$  = 23.5 Hz, CD), 33.4 ( $\text{CH}_2$ ), 28.2 ( $\text{CH}_3$ ), 26.3 ( $\text{CH}_2$ ); HRMS (ES) Found:  $\text{MNa}^+$ , 333.1699.  $\text{C}_{20}\text{H}_{22}\text{DNO}_2\text{Na}$  requires  $\text{MNa}^+$ , 333.1689; LRMS  $m/z$  (ES) 333 (100%), 277 (40), 233 (30).

**(*RS*)-*tert*-Butyl 2-Phenyl-2-(tributylstannyl)-1,2,3,4-tetrahydroquinoline-1-carboxylate **3d****

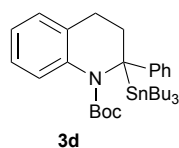

*n*-BuLi (0.16 mL, 0.39 mmol, 2.4 M in hexanes) was added dropwise to the carbamate **2a** (101 mg, 0.33 mmol) in THF (1.3 mL) at  $-78$  °C. After 6 min, tributyltin chloride (0.31 mL, 1.15 mmol) was added and the mixture was allowed to warm to room temperature over 16 h then MeOH (1 mL) was added. The solvent was evaporated and the residue was purified by column chromatography on silica gel, eluting with petrol–EtOAc (97:3), to give the carbamate **3d** (141 mg, 72%) as an amorphous solid; m.p. 52–54 °C;  $R_f$  0.75 [petrol–EtOAc (95:5)]; FT-IR  $\nu_{\max}$  (film)/ $\text{cm}^{-1}$  2955, 2920, 2870, 1670, 1490;  $^1\text{H}$  NMR (400 MHz,  $\text{CDCl}_3$ )  $\delta$  = 7.40–7.35 (1H, m, CH), 7.20–7.14 (2H, m, 2  $\times$  CH), 7.09–7.01 (3H, m, 3  $\times$  CH), 6.99–6.92 (2H, m, 2  $\times$  CH), 6.92–6.86 (1H, m, CH), 2.85–2.74 (1H, m, CH), 2.70–2.51 (3H, m, 3  $\times$  CH), 1.54 (9H, s, *t*-Bu), 1.47–1.33 (6H, m, 3  $\times$   $\text{CH}_2$ ), 1.33–1.20 (6H, m, 3  $\times$   $\text{CH}_2$ ), 0.87 (9H, t,  $J$  = 7.0 Hz, 3  $\times$   $\text{CH}_3$ ), 0.82–0.69 (6H, m, 3  $\times$   $\text{CH}_2$ );  $^{13}\text{C}$  NMR (100 MHz,  $\text{CDCl}_3$ )  $\delta$  = 156.1 (C=O), 146.3 (C), 139.0 (C), 131.7 (C), 128.1 (CH), 127.9 (CH), 126.5 (CH), 124.9 (CH), 124.6 (CH), 123.8 (CH), 123.4 (CH), 81.2 (C), 60.5 (C), 33.4 ( $\text{CH}_2$ ), 29.1 ( $\text{CH}_2$ ), 28.4 ( $\text{CH}_3$ ), 27.7 ( $\text{CH}_2$ ), 25.2 ( $\text{CH}_2$ ), 13.7 ( $\text{CH}_3$ ), 13.4 ( $\text{CH}_2$ ); HRMS (ES) Found:  $\text{MNa}^+$ , 622.2706.  $\text{C}_{32}\text{H}_{49}\text{NO}_2\text{Na}^{120}\text{Sn}$  requires  $\text{MNa}^+$ , 622.2683; LRMS  $m/z$  (ES) 622 (100%), 486 (25), 412 (90).

**(*RS*)-*tert*-Butyl 2-Methyl 2-Phenyl-1,2,3,4-tetrahydroquinoline-1-carboxylate 3e**

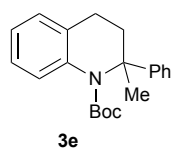

*n*-BuLi (0.15 mL, 0.38 mmol, 2.5 M in hexanes) was added dropwise to the carbamate **2a** (100 mg, 0.32 mmol) in THF (1.3 mL) at  $-78$  °C. After 6 min, iodomethane (0.1 mL, 1.13 mmol) was added and the mixture was allowed to warm to room temperature over 16 h then MeOH (1 mL) was added. The solvent was evaporated and the residue was purified by column chromatography on silica gel, eluting with petrol–EtOAc (95:5), to give the carbamate **3e** (91 mg, 87%) as an oil;  $R_f$  0.5 [petrol–EtOAc (95:5)]; FT-IR  $\nu_{\max}$  (film)/ $\text{cm}^{-1}$  3025, 2930, 2850, 2825, 1730;  $^1\text{H}$  NMR (400 MHz,  $\text{CDCl}_3$ )  $\delta$  = 7.73–6.98 (9H, m, 9  $\times$  CH), 2.79– 2.72 (1H, m, CH), 2.54– 2.48 (1H, m, CH), 2.05 (3H, s,  $\text{CH}_3$ ), 1.99–1.93 (2H, m, 2  $\times$  CH), 1.21 (9H, s *t*-Bu);  $^{13}\text{C}$  NMR (100 MHz,  $\text{CDCl}_3$ )  $\delta$  = 154.5 (C=O), 149.3 (C), 139.1 (C), 132.9 (C), 128.1 (CH), 127.4 (CH), 126.0 (CH), 125.9 (CH), 124.8 (CH), 124.7 (CH), 122.7 (CH), 80.8 (C), 62.7 (C), 44.4 ( $\text{CH}_2$ ), 27.9 ( $\text{CH}_3$ ), 27.5 ( $\text{CH}_3$ ), 24.9 ( $\text{CH}_2$ ); HRMS (ES) Found:  $\text{MH}^+$ , 324.1949.  $\text{C}_{21}\text{H}_{26}\text{NO}_2$  requires  $\text{MH}^+$ , 324.1964; LRMS  $m/z$  (ES) 324 (50%), 268 (100).

Resolution between the enantiomers of the carbamate **3e** was achieved using a Beckman system fitted with a Lux  $\times$  3u Cellulose–1 column (250 mm  $\times$  4.60 mm i.d.) as the stationary phase with a mixture of *n*-hexane–isopropanol (99:1 v/v) as the mobile phase at a flow rate of 1.0  $\text{mL}\cdot\text{min}^{-1}$ ; ambient temperature, detection by UV absorbance at 254 nm. Injection volume 20  $\mu\text{L}$  of the sample prepared in a 2  $\text{g}\cdot\text{L}^{-1}$  solution of the eluent. Under these conditions, the components were eluted at 5.6 min and 6.5 min.



**(*RS*)-*tert*-Butyl 2-Allyl 2-Phenyl-1,2,3,4-tetrahydroquinoline-1-carboxylate 3f**

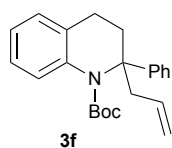

*n*-BuLi (0.15 mL, 0.38 mmol, 2.5 M in hexanes) was added dropwise to the carbamate **2a** (100 mg, 0.32 mmol) in THF (1.3 mL) at  $-78$  °C. After 6 min, allyl bromide (0.1 mL, 1.13 mmol) was added and the mixture was allowed to warm to room temperature over 16 h then MeOH (1 mL) was added. The solvent was evaporated and the residue was purified by column chromatography on silica gel, eluting with petrol–EtOAc (95:5), to give the carbamate **3f** (88 mg, 78%) as an amorphous solid; m.p. 58–60 °C;  $R_f$  0.5 [petrol–EtOAc (95:5)]; FT-IR  $\nu_{\max}$  (film)/ $\text{cm}^{-1}$  3055, 3030, 2980, 2920, 1690, 1640;  $^1\text{H}$  NMR (400 MHz,  $\text{CDCl}_3$ )  $\delta$  = 7.63–6.96 (9H, m, 9  $\times$  CH), 5.92–5.82 (1H, m, CH), 5.20 (1H, dd,  $J$  17.0, 2.0 Hz, CH), 5.11 (1H, dd,  $J$  10.0, 2.0 Hz, CH), 3.59 (1H, dd,  $J$  13.0, 7.0 Hz, CH), 2.97 (1H, dd,  $J$  13.0, 7.0 Hz, CH), 2.79 (1H, dt,  $J$  15.0, 3.0 Hz, CH), 2.31 (1H, dt,  $J$  15.0, 3.0 Hz, CH), 2.07 (1H, td,  $J$  13.0, 3.0 Hz, CH), 1.90 (1H, dt,  $J$  13.0, 3.0 Hz, CH), 1.19 (9H, s, *t*-Bu);  $^{13}\text{C}$  NMR (100 MHz,  $\text{CDCl}_3$ )  $\delta$  = 154.4 (C=O), 149.1 (C), 139.8 (C), 133.6 (CH), 132.7 (C), 128.1 (2  $\times$  CH), 127.3 (CH), 126.0 (CH), 124.9 (CH), 122.7 (CH), 118.6 ( $\text{CH}_2$ ), 116.1 (CH), 80.9 (C), 64.7 (C), 44.2 ( $\text{CH}_2$ ), 40.7 ( $\text{CH}_2$ ), 27.9 ( $\text{CH}_3$ ), 24.1 ( $\text{CH}_2$ ); HRMS (ES) Found:  $\text{MH}^+$ , 350.2133.  $\text{C}_{23}\text{H}_{28}\text{NO}_2$  requires  $\text{MH}^+$ , 350.2120; LRMS  $m/z$  (ES) 350 (100%), 335 (80).

**(*RS*)-*tert*-Butyl 2-(2-Methoxy-2-oxoethyl)-2-phenyl-1,2,3,4-tetrahydroquinoline-1-carboxylate **3g****

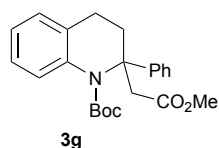

*n*-BuLi (0.16 mL, 0.38 mmol, 2.4 M in hexanes) was added dropwise to the carbamate **2a** (97 mg, 0.31 mmol) in THF (1.3 mL) at  $-78$  °C. After 6 min, methyl bromoacetate (0.1 mL, 1.1 mmol) was added and the mixture was allowed to warm to room temperature over 16 h then MeOH (1 mL) was added. The solvent was evaporated and the residue was purified by column chromatography on silica gel, eluting with petrol–EtOAc (97:3), to give the carbamate **3g** (76 mg, 63%) as an amorphous solid; m.p. 93–95 °C;  $R_f$  0.37 [petrol–EtOAc (9:1)]; FT-IR  $\nu_{\max}$  (film)/ $\text{cm}^{-1}$  3060, 3030, 3000, 2950, 2920, 1735, 1700, 1490;  $^1\text{H}$  NMR (400 MHz,  $\text{CDCl}_3$ )  $\delta$  = 7.61–7.56 (1H, m, CH), 7.40–7.25 (5H, m, 5  $\times$  CH), 7.23–7.16 (1H, m, CH), 7.09–7.03 (1H, m, CH), 6.98 (1H, td,  $J$  = 7.5, 1.0 Hz, CH), 3.83 (1H, d,  $J$  = 12.5 Hz, CH), 3.56 (3H, s,  $\text{OCH}_3$ ), 3.23 (1H, d,  $J$  = 12.5 Hz, CH), 2.83–2.72 (1H, m, CH), 2.62 (1H, td,  $J$  = 13.0, 3.0 Hz, CH), 2.31 (1H, dt,  $J$  = 15.0, 3.0 Hz, CH), 2.00 (1H, dt,  $J$  = 13.0, 3.0 Hz, CH), 1.21 (9H, s, *t*-Bu);  $^{13}\text{C}$  NMR (100 MHz,  $\text{CDCl}_3$ )  $\delta$  = 170.9 (C=O), 154.1 (C=O), 148.2 (C), 138.9 (C), 132.5 (C), 128.2 (CH), 127.3 (CH), 126.3 (CH), 125.9 (CH), 124.8 (CH), 124.5 (CH), 123.0 (CH), 81.2 (C), 63.7 (C), 51.6 ( $\text{CH}_3$ ), 44.1 ( $\text{CH}_2$ ), 40.7 ( $\text{CH}_2$ ), 27.8 ( $\text{CH}_3$ ), 24.0 ( $\text{CH}_2$ ); HRMS (ES) Found:  $\text{MH}^+$ , 382.2008.  $\text{C}_{23}\text{H}_{28}\text{NO}_4$  requires  $\text{MH}^+$ , 382.2013; LRMS  $m/z$  (ES) 382 (5%), 282 (100).

Resolution between the enantiomers of the tetrahydroquinoline **3g** was achieved using a Beckman system fitted with a Lux Cellulose–2 column (250 mm  $\times$  460 mm i.d.) as the stationary phase with a mixture of *n*-hexane–isopropanol (99.2:0.8 v/v) as the

mobile phase at a flow rate of 1 mL·min<sup>-1</sup>; ambient temperature, detection by UV absorbance at 254 nm. Injection volume 20 μL of the sample prepared in a 2 g·L<sup>-1</sup> solution of the eluent. Under these conditions, the components were eluted at 18 min and 20 min.

**(*RS*)-*tert*-Butyl 2-Benzyl-2-phenyl-1,2,3,4-tetrahydroquinoline-1-carboxylate 3h**

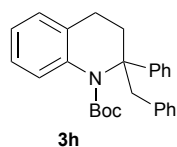

*n*-BuLi (0.15 mL, 0.38 mmol, 2.5 M in hexanes) was added dropwise to the carbamate **2a** (100 mg, 0.32 mmol) in THF (1.3 mL) at -78 °C. After 6 min, benzyl bromide (0.1 mL, 1.13 mmol) was added and the mixture was allowed to warm to room temperature over 16 h then MeOH (1 mL) was added. The solvent was evaporated and the residue was purified by column chromatography on silica gel, eluting with petrol–EtOAc (95:5), to give the carbamate **3h** (98 mg, 76%) as plates; m.p. 138–140 °C; *R*<sub>f</sub> 0.4 [petrol–EtOAc (95:5)]; FT-IR  $\nu_{\text{max}}$  (film)/cm<sup>-1</sup> 3059, 3030, 2930, 2960, 1690; <sup>1</sup>H NMR (400 MHz, CDCl<sub>3</sub>)  $\delta$  = 7.48 (2H, d, *J* 7.0 Hz, CH), 7.41 (2H, t, *J* 8.0 Hz, 2 × CH), 7.33–7.28 (3H, m, 3 × CH), 7.24–6.78 (7H, m, 7 × CH), 4.19 (1H, d, *J* 13.0 Hz, CH), 3.45 (1H, d, *J* 13.0 Hz, CH), 2.78 (1H, dt, *J* 13.0, 3.0 Hz, CH), 2.25 (1H, dt, *J* 13.0, 3.0 Hz, CH), 2.19 (1H, dt, *J* 13.0, 3.0 Hz, CH), 1.96 (1H, dt, *J* 13.0, 3.0 Hz, CH), 1.29 (9H, s, *t*-Bu); <sup>13</sup>C NMR (100 MHz, CDCl<sub>3</sub>)  $\delta$  = 154.6 (C=O), 149.3 (C), 138.9 (C), 137.0 (C), 132.7 (C), 131.2 (CH), 128.2 (CH), 127.8 (CH), 126.7 (CH), 126.5 (CH), 126.1 (CH), 125.4 (CH), 125.3 (CH), 125.1 (CH), 122.5 (CH), 81.1 (C), 65.7 (C), 43.6 (CH<sub>2</sub>), 39.9 (CH<sub>2</sub>), 28.0 (CH<sub>3</sub>), 23.9 (CH<sub>2</sub>); HRMS (ES) Found: MH<sup>+</sup>, 400.2262. C<sub>27</sub>H<sub>30</sub>NO<sub>2</sub> requires MH<sup>+</sup>, 400.2277; LRMS *m/z* (ES) 400 (100%).

**(*RS*)-tert-Butyl 2-(4-Bromobenzyl)-2-phenyl-1,2,3,4-tetrahydroquinoline-1-carboxylate **3i****

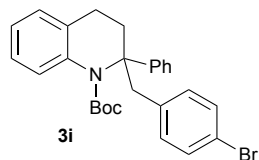

*n*-BuLi (0.15 mL, 0.37 mmol, 2.5 M in hexanes) was added dropwise to the carbamate **2a** (100 mg, 0.32 mmol) in THF (1.3 mL) at  $-78$  °C. After 6 min, 4-bromobenzyl bromide (282 mg, 1.13 mmol) was added and the mixture was allowed to warm to room temperature over 16 h then MeOH (1 mL) was added. The solvent was evaporated and the residue was purified by column chromatography on silica gel, eluting with petrol–EtOAc (95:5), to give the carbamate **3i** (97 mg, 63%) as cubes; m.p. 139–141 °C;  $R_f$  0.33 [petrol–EtOAc (95:5)]; FT-IR  $\nu_{\max}$  (film)/ $\text{cm}^{-1}$  3035, 3010, 2980, 2930, 1700;  $^1\text{H}$  NMR (400 MHz,  $\text{CDCl}_3$ )  $\delta$  = 7.46–6.82 (13H, m, 13  $\times$  CH), 4.15 (1H, d,  $J$  13.0 Hz, CH), 3.40 (1H, d,  $J$  13.0 Hz, CH), 2.78 (1H, t,  $J$  13.0 Hz, CH), 2.24–2.12 (2H, m, 2  $\times$  CH), 1.96 (1H, dt,  $J$  13.0, 3.0 Hz, CH), 1.29 (9H, s, *t*-Bu);  $^{13}\text{C}$  NMR (100 MHz,  $\text{CDCl}_3$ )  $\delta$  = 154.1 (C=O), 148.9 (C), 138.8 (C), 136.1 (C), 132.8 (CH), 132.6 (C), 130.9 (CH), 128.3 (CH), 126.8 (CH), 126.2 (CH), 125.7 (CH), 125.1 (CH), 125.0 (CH), 122.7 (CH), 120.6 (C), 81.3 (C), 65.5 (C), 43.2 ( $\text{CH}_2$ ), 39.9 ( $\text{CH}_2$ ), 28.0 ( $\text{CH}_3$ ), 23.9 ( $\text{CH}_2$ ); HRMS (ES) Found:  $\text{MH}^+$ , 478.1364.  $\text{C}_{27}\text{H}_{29}\text{NO}_2$   $^{79}\text{Br}$  requires  $\text{MH}^+$ , 478.1382; LRMS  $m/z$  (ES) 480 (30%,  $\text{MH}^+$  for  $^{81}\text{Br}$ ), 478 (30,  $\text{MH}^+$  for  $^{79}\text{Br}$ ), 424 (100), 422 (100).

Resolution between the enantiomers of the carbamate **3i** was achieved using a Beckman system fitted with a Lux  $\times$  3u Cellulose–1 column (250 mm  $\times$  4.60 mm i.d.) as the stationary phase with a mixture of *n*-hexane–isopropanol (99:1 v/v) as the

mobile phase at a flow rate of  $1.0 \text{ mL}\cdot\text{min}^{-1}$ ; ambient temperature, detection by UV absorbance at 254 nm. Injection volume  $20 \text{ }\mu\text{L}$  of the sample prepared in a  $2 \text{ g}\cdot\text{L}^{-1}$  solution of the eluent. Under these conditions, the components were eluted at 7.2 min and 7.9 min.

**(*RS*)-*tert*-Butyl 2-[2-(Methoxycarbonyl)phenyl]-1,2,3,4-tetrahydroquinoline-1-carboxylate **4****

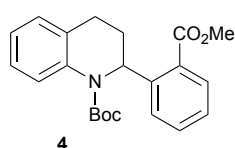

*n*-BuLi (0.16 mL, 0.39 mmol, 2.4 M in hexanes) was added dropwise to the carbamate **2a** (101 mg, 0.33 mmol) in THF (1.3 mL) at  $-78 \text{ }^\circ\text{C}$ . After 6 min, methyl cyanofornate (0.09 mL, 1.14 mmol) was added. After 1 h, MeOH (1 mL) was added and the mixture was allowed to warm to room temperature. The solvent was evaporated and the residue was purified by column chromatography on silica gel, eluting with petrol–EtOAc (95:5), to give the carbamate **4** (74 mg, 62%) as an amorphous solid; m.p.  $73\text{--}75 \text{ }^\circ\text{C}$ ;  $R_f$  0.46 [petrol–EtOAc (9:1)]; FT-IR  $\nu_{\text{max}}$  (film)/ $\text{cm}^{-1}$  3070, 3030, 3005, 2975, 2950, 2930, 1715, 1700, 1600, 1490;  $^1\text{H}$  NMR (400 MHz,  $\text{CDCl}_3$ )  $\delta = 7.95\text{--}7.88$  (2H, m,  $2 \times \text{CH}$ ), 7.47–7.41 (1H, m, CH), 7.37–7.24 (3H, m,  $3 \times \text{CH}$ ), 7.17–7.12 (1H, m, CH), 7.06 (1H, td,  $J = 7.5, 1.0 \text{ Hz}$ , CH), 6.09 (1H, dd,  $J = 10.5, 7.0 \text{ Hz}$ , CH), 3.95 (3H, s,  $\text{OCH}_3$ ), 2.83–2.60 (3H, m,  $3 \times \text{CH}$ ), 1.63–1.51 (1H, m, CH), 1.25 (9H, s, *t*-Bu);  $^{13}\text{C}$  NMR (100 MHz,  $\text{CDCl}_3$ )  $\delta = 167.5$  (C=O), 153.8 (C=O), 148.8 (C), 138.7 (C), 133.9 (C), 132.7 (CH), 130.2 (CH), 127.7 (C), 127.2 (CH), 126.5 (CH), 126.2 (CH), 125.9 (CH), 124.4 (CH), 123.4 (CH), 80.7 (C), 56.7 (CH), 52.0 ( $\text{CH}_3$ ), 33.8 ( $\text{CH}_2$ ), 27.9 ( $\text{CH}_3$ ), 27.3

(CH<sub>2</sub>); HRMS (ES) Found: MNa<sup>+</sup>, 390.1681. C<sub>22</sub>H<sub>25</sub>NO<sub>4</sub>Na requires MNa<sup>+</sup>, 390.1676; LRMS *m/z* (ES) 390 (15%), 268 (100).

From deuterium isotope studies (see manuscript), compound **4** is suggested to arise from lithiation of **2a** at C-2, followed by coordination of MeOCOCN to the organolithium to give an intermediate (see Fig 2c in the manuscript) that reacts at the ortho position. This would lead initially to a dearomatised intermediate but the C–H bond alpha to the ester is likely to break easily and rearomatisation would rapidly give product **4** according to the following scheme:

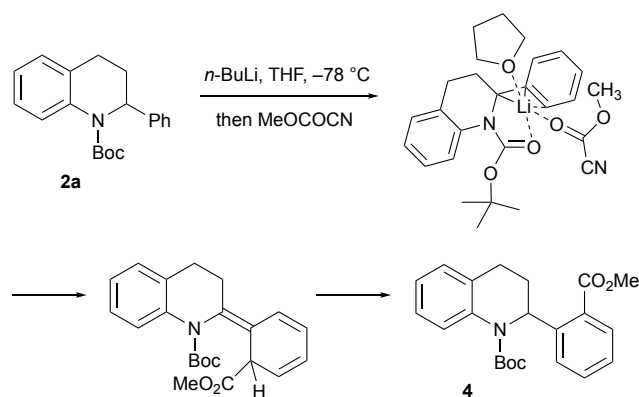

**(RS)-tert-Butyl 2-Methyl 2-Phenyl-1,2,3,4-tetrahydroquinoline-1,2-dicarboxylate  
(phenyl-d<sub>5</sub>) **13****

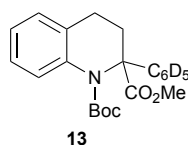

*n*-BuLi (0.17 mL, 0.39 mmol, 2.3 M in hexanes) was added dropwise to the carbamate **2b** (102 mg, 0.33 mmol) in THF (1.3 mL) at -78 °C. After 6 min, methyl chloroformate (0.09 mL, 1.13 mmol) was added. The mixture was allowed to warm to room temperature over 16 h then MeOH (1 mL) was added. The solvent was evaporated and the residue was purified by column chromatography on silica gel, eluting with petrol–EtOAc (95:5), to give the carbamate **13** (98 mg, 81%) as an

amorphous solid; m.p. 107–108 °C;  $R_f$  0.38 [petrol–EtOAc (9:1)]; FT-IR  $\nu_{\max}$  (film)/ $\text{cm}^{-1}$  3020, 3005, 2975, 2955, 2890, 2835, 1735, 1690, 1430;  $^1\text{H}$  NMR (400 MHz,  $\text{CDCl}_3$ )  $\delta$  = 7.93 (1H, d,  $J$  = 8.0 Hz, CH), 7.33–7.24 (1H, m, CH), 7.13–6.99 (2H, m, 2  $\times$  CH), 3.82 (3H, s,  $\text{OCH}_3$ ), 2.93–2.77 (1H, m, CH), 2.66–2.44 (2H, m, 2  $\times$  CH), 2.26–2.12 (1H, m, CH), 1.33 (9H, s,  $t\text{-Bu}$ );  $^{13}\text{C}$  NMR (100 MHz,  $\text{CDCl}_3$ , deuterated carbons could not be observed)  $\delta$  = 173.5 (C=O), 153.8 (C=O), 142.2 (C), 137.8 (C), 131.6 (C), 127.6 (CH), 126.5 (CH), 124.3 (CH), 123.4 (CH), 82.1 (C), 68.7 (C), 52.4 ( $\text{CH}_3$ ), 39.5 ( $\text{CH}_2$ ), 27.9 ( $\text{CH}_3$ ), 25.2 ( $\text{CH}_2$ ); HRMS (ES) Found:  $\text{MNa}^+$ , 395.1993.  $\text{C}_{22}\text{H}_{20}\text{D}_5\text{NO}_4\text{Na}$  requires  $\text{MNa}^+$ , 395.1990; LRMS  $m/z$  (ES) 395 (10%), 273 (100).

**(*RS*)-*tert*-Butyl 2-[2-(Methoxycarbonyl)phenyl]-1,2,3,4-tetrahydroquinoline-1-carboxylate (phenyl-d4) and (*RS*)-*tert*-Butyl 2-[2-(Methoxycarbonyl)phenyl]-1,2,3,4-tetrahydro(2- $^2\text{H}$ ) quinoline-1-carboxylate (phenyl-d4) **14****

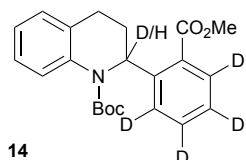

$n\text{-BuLi}$  (0.17 mL, 0.39 mmol, 2.3 M in hexanes) was added dropwise to the carbamate **2b** (102 mg, 0.33 mmol) in THF (1.3 mL) at  $-78$  °C. After 6 min, methyl cyanofornate (0.09 mL, 1.14 mmol) was added. The mixture was allowed to warm to room temperature over 16 h then MeOH (1 mL) was added. The solvent was evaporated and the residue was purified by column chromatography on silica gel, eluting with petrol–EtOAc (95:5), to give the carbamates **14** (58 mg, 46%) as an amorphous solid, ratio H:D 1:2; m.p. 69–71 °C;  $R_f$  0.19 [petrol–EtOAc (95:5)]; FT-IR  $\nu_{\max}$  (film)/ $\text{cm}^{-1}$  3025, 3005, 2970, 2950, 2845, 1710, 1695, 1490;  $^1\text{H}$  NMR (400 MHz,

CDCl<sub>3</sub>)  $\delta$  = 7.92 (1H, d,  $J$  = 8.5 Hz, CH), 7.34–7.25 (1H, m, CH), 7.15 (1H, d,  $J$  = 7.5 Hz, CH), 7.10–7.04 (1H, m, CH), 6.10 (0.33H, dd,  $J$  = 10.0, 7.0 Hz, CH), 3.95 (3H, s, OCH<sub>3</sub>), 2.84–2.59 (3H, m, 3  $\times$  CH), 1.64–1.51 (1H, m, CH), 1.25 (9H, s, *t*-Bu); <sup>13</sup>C NMR (100 MHz, CDCl<sub>3</sub>, deuterated carbons could not be observed)  $\delta$  = 167.5 (C=O), 153.9 (C=O), 148.8 and 148.7 (C), 138.7 (C), 133.9 (C), 127.6 (C), 127.2 (CH), 126.5 (CH), 124.4 (CH), 123.4 (CH), 80.7 (C), 56.6 (CH), 52.0 (CH<sub>3</sub>), 33.7 and 33.6 (CH<sub>2</sub>), 27.9 (CH<sub>3</sub>), 27.2 (CH<sub>2</sub>); HRMS (ES) Found: MNa<sup>+</sup>, 394.1931. C<sub>22</sub>H<sub>21</sub>D<sub>4</sub>NO<sub>4</sub>Na requires MNa<sup>+</sup>, 394.1927 for  $\alpha$ -H; Found: MNa<sup>+</sup>, 395.1985. C<sub>22</sub>H<sub>20</sub>D<sub>5</sub>NO<sub>4</sub>Na requires MNa<sup>+</sup>, 395.1990 for  $\alpha$ -D; LRMS  $m/z$  (ES) 395 (15%), 394 (20), 273 (80), 272 (100).

## 1.2 Kinetic resolutions

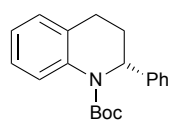

**2a** (er 97:3)

*n*-BuLi (1.6 mL, 3.9 mmol, 2.5 M in hexane) was added to freshly distilled (–)-sparteine (984 mg, 1.0 mmol) in PhMe (20 mL) at –78 °C. After 30 min, the tetrahydroquinoline **2a** (1.0 g, 3.2 mmol, 0.3 M solution in toluene) was added. After 2.5 h, methyl chloroformate (0.9 mL, 11 mmol) was added dropwise. The mixture was allowed to warm to room temperature over 16 h and then MeOH (5 mL) was added. Purification by flash column chromatography on silica gel, eluting with petrol–EtOAc (95:5), gave the recovered tetrahydroquinoline (*R*)-**2a** (427 mg, 43%) as plates; m.p. 60–61 °C; other data as above; er 97:3, determined by CSP HPLC with the Lux  $\times$  3u Cellulose–1 column (major component eluted at 12.8 min);  $[\alpha]_D^{23}$  +113 (0.7, CHCl<sub>3</sub>).



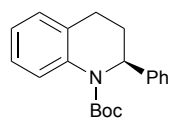

**2a** (er 92:8)

In the same way as above, *n*-BuLi (0.16 mL, 0.39 mmol, 2.45 M in hexanes), (+)-sparteine (100 mg, 0.43 mmol), PhMe (4 mL), tetrahydroquinoline **2a** (101 mg, 0.33 mmol) and methyl chloroformate (0.09 mL, 1.15 mmol) gave, after purification by column chromatography on silica gel, eluting with petrol–EtOAc (97:3), recovered tetrahydroquinoline (*S*)-**2a** (46 mg, 45%) as an amorphous solid; m.p. 51–54 °C; other data as above; er 92:8, determined by CSP-HPLC with the Cellulose-2 column (major component eluted at 6.6 min);  $[\alpha]_D^{25} -85.5$  (0.8, CHCl<sub>3</sub>); in addition, the carbamate (*R*)-**3a** (51 mg, 42%) was isolated; m.p. 71–74 °C; other data as above; er 93:7, determined by CSP-HPLC (major component eluted at 22.5 min);  $[\alpha]_D^{25} +76.6$  (0.9, CHCl<sub>3</sub>).

Alternatively, the *n*-BuLi can be added last: (+)-sparteine (106 mg, 0.45 mmol) and the tetrahydroquinoline **2a** (108 mg, 0.35 mmol) in toluene (8 mL) were cooled to –78 °C then *n*-BuLi (0.17 mL, 0.42 mmol, 2.5 M in hexanes) was added. After 2.5 h, ethyl chloroformate (0.12 mL, 1.22 mmol) was added to give, after purification by column chromatography on silica gel, eluting with petrol–EtOAc (97:3), the recovered tetrahydroquinoline (*S*)-**2a** (49 mg, 45%); data as above; er 90:10 determined by CSP-HPLC (major component eluted at 6.0 min); together with the carbamate (*R*)-**3b** (53 mg, 40%); data as above; er 90:10 by CSP-HPLC (major component eluted at 9.4 min).

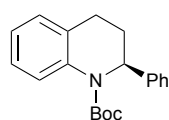

**2a** (er 98:2)

In the same way as above, *n*-BuLi (0.16 mL, 0.39 mmol, 2.5 M in hexanes), (+)-sparteine (106 mg, 0.45 mmol), PhMe (4 mL), tetrahydroquinoline **2a** (101 mg, 0.33

mmol) and methyl chloroformate (0.09 mL, 1.15 mmol) gave, after purification by column chromatography on silica gel, eluting with petrol–EtOAc (97:3), recovered tetrahydroquinoline (*S*)-**2a** (44 mg, 43%) as an amorphous solid; data as above; er 98:2, determined by CSP-HPLC with the Cellulose-2 column (major component eluted at 6.1 min);  $[\alpha]_{\text{D}}^{23}$   $-103.9$  (0.6,  $\text{CHCl}_3$ ); in addition, the carbamate (*R*)-**3a** (65 mg, 54%) was isolated; data as above; er 82:18 by CSP-HPLC (major component eluted at 23 min);  $[\alpha]_{\text{D}}^{24}$   $+67.5$  (1.0,  $\text{CHCl}_3$ ).

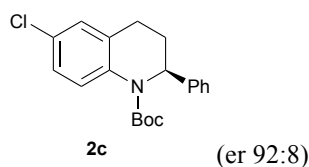

In the same way as above, *n*-BuLi (0.12 mL, 0.29 mmol, 2.4 M in hexanes), (+)-sparteine (119 mg, 0.51 mmol), PhMe (4 mL), tetrahydroquinoline **2c** (101 mg, 0.29 mmol) and methyl chloroformate (0.08 mL, 1.03 mmol) with a reaction time of 75 min gave, after purification by column chromatography on silica gel, eluting with petrol–EtOAc (97:3), recovered tetrahydroquinoline (*S*)-**2c** (40 mg, 41%) as a gum; data as above; er 92:8, determined by CSP-HPLC (major component eluted at 5.4 min);  $[\alpha]_{\text{D}}^{23}$   $-98.9$  (0.1,  $\text{CHCl}_3$ ); in addition, the carbamate **5** (54 mg, 42%) was isolated as an amorphous solid:

**(*R*)-1-*tert*-Butyl 2-Methyl 6-Chloro-2-phenyl-1,2,3,4-tetrahydroquinoline-1,2-dicarboxylate **5****

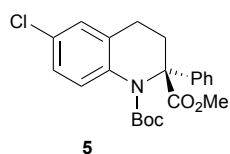

m.p. 41–43 °C;  $R_f$  0.17 [petrol–EtOAc (95:5)]; FT-IR  $\nu_{\text{max}}$  (film)/ $\text{cm}^{-1}$  3065, 3025, 2975, 2970, 1745, 1705, 1485;  $^1\text{H}$  NMR (400 MHz,  $\text{CDCl}_3$ )  $\delta$  = 7.86 (1H, d,  $J$  = 9.0

Hz, CH), 7.62–7.56 (2H, m, 2 × CH), 7.37–7.30 (2H, m, 2 × CH), 7.28–7.19 (2H, m, 2 × CH), 7.06 (1H, d,  $J = 2.5$  Hz, CH), 3.80 (3H, s, OCH<sub>3</sub>), 2.78 (1H, ddd,  $J = 15.5, 8.5, 2.5$  Hz, CH), 2.58–2.41 (2H, m, 2 × CH), 2.23–2.14 (1H, m, CH), 1.30 (9H, m, *t*-Bu); <sup>13</sup>C NMR (100 MHz, CDCl<sub>3</sub>)  $\delta = 173.1$  (C=O), 153.6 (C=O), 141.9 (C), 136.4 (C), 133.2 (C), 128.4 (C), 127.8 (CH), 127.3 (CH), 127.0 (CH), 126.6 (CH), 126.5 (CH), 125.6 (CH), 82.5 (C), 68.7 (C), 52.5 (OCH<sub>3</sub>), 38.8 (CH<sub>2</sub>), 27.8 (CH<sub>3</sub>), 25.0 (CH<sub>2</sub>); HRMS (ES) Found MH<sup>+</sup>, 424.1305. C<sub>24</sub>H<sub>23</sub><sup>35</sup>ClNO<sub>4</sub> requires MH<sup>+</sup>, 424.1310; Found MH<sup>+</sup>, 426.1284. C<sub>24</sub>H<sub>23</sub><sup>37</sup>ClNO<sub>4</sub> requires MH<sup>+</sup>, 426.1291; LRMS  $m/z$  (ES) 426 (5%), 424 (10), 304 (30), 302 (100); er 86:14, determined by CSP-HPLC (Lux Cellulose-2 column, major component eluted at 7.3 min),  $[\alpha]_D^{25} +51.2$  (1.2, CHCl<sub>3</sub>).

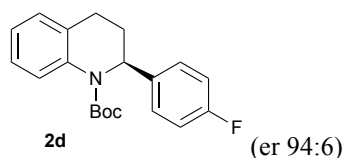

In the same way as above, *n*-BuLi (0.13 mL, 0.32 mmol, 2.5 M in hexanes), (+)-sparteine (133 mg, 0.57 mmol), PhMe (4 mL), tetrahydroquinoline **2d** (106 mg, 0.32 mmol) and methyl chloroformate (0.09 mL, 1.13 mmol) with a reaction time of 90 min gave, after purification by column chromatography on silica gel, eluting with petrol–EtOAc (97:3), recovered tetrahydroquinoline (*S*)-**2d** (39 mg, 36%) as an amorphous solid; data as above; er 94:6, determined by CSP-HPLC (major component eluted at 6.2 min);  $[\alpha]_D^{24} -77.7$  (0.1, CHCl<sub>3</sub>); in addition, the carbamate **6** (53 mg, 42%) was isolated as an amorphous solid:

**(*R*)-1-*tert*-Butyl 2-Methyl-2-(4-fluorophenyl)-1,2,3,4-tetrahydroquinoline-1,2-dicarboxylate 6**

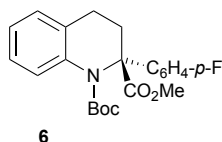

m.p. 42–44 °C;  $R_f$  0.25 [petrol–EtOAc (95:5)]; FT-IR  $\nu_{\max}$  (film)/ $\text{cm}^{-1}$  3080, 3070, 3030, 3005, 2980, 1745, 1710;  $^1\text{H}$  NMR (400 MHz,  $\text{CDCl}_3$ )  $\delta$  = 7.88 (1H, d,  $J$  = 8.0 Hz, CH), 7.65–7.58 (2H, m, 2  $\times$  CH), 7.30–7.24 (1H, m, CH), 7.10–7.06 (1H, m, CH), 7.06–6.98 (3H, m, 3  $\times$  CH), 3.81 (3H, s,  $\text{OCH}_3$ ), 2.89–2.80 (1H, m, CH), 2.60–2.43 (2H, m, 2  $\times$  CH), 2.17–2.08 (1H, m, CH), 1.34 (9H, s,  $t\text{-Bu}$ );  $^{13}\text{C}$  NMR (100 MHz,  $\text{CDCl}_3$ )  $\delta$  = 173.4 (C=O), 161.7 (d,  $J$  = 246.0 Hz, C), 153.7 (C=O), 138.1 (d,  $J$  = 3.0 Hz, C), 137.6 (C), 131.5 (C), 128.5 (d,  $J$  = 8.5 Hz, CH), 127.6 (CH), 126.5 (CH), 124.3 (CH), 123.5 (CH), 114.5 (d,  $J$  = 21.5 Hz, CH), 82.2 (C), 68.3 (C), 52.5 ( $\text{CH}_3$ ), 39.5 ( $\text{CH}_2$ ), 27.9 ( $\text{CH}_3$ ), 25.1 ( $\text{CH}_2$ );  $^{19}\text{F}$  NMR (377 MHz,  $\text{CDCl}_3$ )  $\delta$  = 116.5; HRMS (ES) Found:  $\text{MH}^+$ , 386.1754.  $\text{C}_{22}\text{H}_{25}\text{NO}_4\text{F}$  requires  $\text{MH}^+$ , 386.1768; LRMS  $m/z$  (ES) 386 (85%), 371 (20), 330 (100), 286 (75); er 85:15, determined by CSP-HPLC (ChiralPak IA, major component eluted at 18.0 min),  $[\alpha]_D^{23}$  +59.8 (2.1,  $\text{CHCl}_3$ ).

Alternatively, the enantioenriched tetrahydroquinoline **2d** was formed by kinetic resolution with trapping the organolithium by  $\text{MeOCOCN}$ :

$n\text{-BuLi}$  (0.24 mL, 0.58 mmol, 2.4 M in hexane) was added to freshly distilled (+)-sparteine (230 mg, 0.98 mmol) in PhMe (5 mL) at  $-78$  °C. After 30 min, the tetrahydroquinoline **2d** (189 mg, 0.58 mmol, 0.3 M solution in toluene) was added. After 2.5 h, methyl cyanofomate (0.16 mL, 2.0 mmol) was added. The mixture was allowed to warm to room temperature over 16 h and then MeOH (1 mL) was added. Purification by flash column chromatography on silica gel, eluting with petrol–EtOAc (97:3), gave the recovered tetrahydroquinoline (*S*)-**2d** (55 mg, 29%) as an amorphous

solid; data as above; er 98:2, determined by CSP-HPLC (major component eluted at 6.2 min); in addition, the carbamate **6** (51 mg, 23%) was isolated as an amorphous solid; data as above; er 81:19, determined by CSP-HPLC; in addition, the ortho substituted product *tert*-Butyl 2-[4-Fluoro-2-(methoxycarbonyl)phenyl]-1,2,3,4-tetrahydroquinoline-1-carboxylate shown below was isolated (63 mg, 28%) as an amorphous solid:

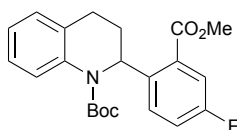

m.p. 64–66 °C;  $R_f$  0.63 [petrol–EtOAc (9:1)]; FT-IR  $\nu_{\max}$  (ATR)/ $\text{cm}^{-1}$  3020, 3005, 2980, 2955, 2930, 1725, 1700, 1585, 1490;  $^1\text{H}$  NMR (400 MHz,  $\text{CDCl}_3$ )  $\delta$  = 7.86 (1H, d,  $J$  = 8.0 Hz, CH), 7.62 (1H, dd,  $J$  = 9.5, 3.0 Hz, CH), 7.36–7.25 (2H, m, 2  $\times$  CH), 7.18–7.11 (2H, m, 2  $\times$  CH), 7.07 (1H, td,  $J$  = 7.5, 1.0 Hz, CH), 6.07 (1H, dd,  $J$  = 10.5, 7.0 Hz, CH), 3.95 (3H, s,  $\text{OCH}_3$ ), 2.81–2.59 (3H, m, 3  $\times$  CH), 1.59–1.47 (1H, m, CH), 1.27 (9H, s, *t*-Bu);  $^{13}\text{C}$  NMR (100 MHz,  $\text{CDCl}_3$ )  $\delta$  = 166.3 (d,  $J$  = 2.5 Hz, C=O), 160.5 (d,  $J$  = 245.5 Hz, C), 153.8 (C=O), 144.8 (d,  $J$  = 4.0 Hz, C), 138.5 (C), 134.0 (C), 129.2 (d,  $J$  = 7.0 Hz, C), 127.9 (d,  $J$  = 7.5 Hz, CH), 127.2 (CH), 126.5 (CH), 124.5 (CH), 123.6 (CH), 119.8 (d,  $J$  = 21.5 Hz, CH), 116.7 (d,  $J$  = 24.0 Hz, CH), 80.8 (C), 56.2 (CH), 52.3 ( $\text{CH}_3$ ), 33.9 ( $\text{CH}_2$ ), 28.0 ( $\text{CH}_3$ ), 27.3 ( $\text{CH}_2$ );  $^{19}\text{F}$  NMR (377 MHz,  $\text{CDCl}_3$ )  $\delta$  = 115.9; HRMS (ES) Found:  $\text{MNa}^+$ , 408.1586.  $\text{C}_{22}\text{H}_{24}\text{FNO}_4\text{Na}$  requires  $\text{MNa}^+$ , 408.1582; er 56:44, determined by CSP-HPLC. Resolution between the enantiomers was achieved using a Beckman system fitted with a Daicel ChiralPak IA column (250 mm  $\times$  460 mm i.d.) as the stationary phase with a mixture of *n*-hexane:isopropanol (99:1 v/v) as the mobile phase at a flow rate of 1  $\text{mL}\cdot\text{min}^{-1}$ ; ambient temperature, detection by UV absorbance at 254 nm. Injection volume was 20

$\mu\text{L}$  of the sample prepared in a  $2 \text{ g}\cdot\text{L}^{-1}$  solution of the eluent. Under these conditions, the components were eluted at 9.2 min and 9.8 min.

These results suggest that coordination of sparteine to the organolithium affects the regioselectivity in the electrophilic quench, since some of the product **6** was formed together with the ortho-substituted product on using methyl cyanoformate.

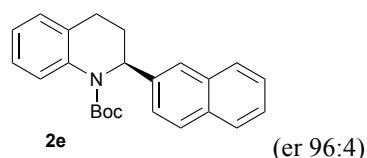

In the same way as above, *n*-BuLi (0.09 mL, 0.23 mmol, 2.5 M in hexanes), (+)-sparteine (90 mg, 0.37 mmol), PhMe (4 mL), tetrahydroquinoline **2e** (100 mg, 0.29 mmol) and methyl chloroformate (0.08 mL, 1.0 mmol) with a reaction time of 90 min gave, after purification by column chromatography on silica gel, eluting with petrol–EtOAc (97:3), recovered tetrahydroquinoline (*S*)-**2e** (40 mg, 39%) as a gum; data as above; er 96:4, determined by CSP-HPLC (major component eluted at 9.1 min);  $[\alpha]_{\text{D}}^{20} -61.8$  (0.1,  $\text{CHCl}_3$ ); in addition, the carbamate **7** (20 mg, ~12%) was isolated as an amorphous solid:

#### **1-*tert*-Butyl 2-Methyl 2-(Naphthalen-2-yl)-1,2,3,4-tetrahydroquinoline-1,2-dicarboxylate **7****

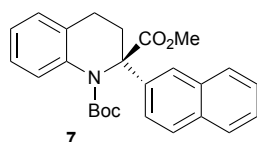

m.p. 47–49 °C;  $R_f$  0.40 [petrol–EtOAc (9:1)]; FT-IR  $\nu_{\text{max}}$  (film)/ $\text{cm}^{-1}$  3065, 2975, 2925, 2850, 1745, 1710;  $^1\text{H}$  NMR (400 MHz,  $\text{CDCl}_3$ )  $\delta = 8.08$  (1H, d,  $J = 1.5$  Hz, CH),

7.99 (1H, d,  $J = 8.0$  Hz, CH), 7.86–7.76 (4H, m,  $4 \times$  CH), 7.51–7.45 (2H, m,  $2 \times$  CH), 7.33–7.27 (1H, m, CH), 7.08 (1H, dd,  $J = 7.5, 1.5$  Hz, CH), 7.03 (1H, td,  $J = 7.5, 1.5$  Hz, CH), 3.84 (3H, s, OCH<sub>3</sub>), 2.84 (1H, ddd,  $J = 14.5, 9.0, 3.0$  Hz, CH), 2.63 (1H, ddd,  $J = 13.5, 8.0, 3.0$  Hz, CH), 2.51 (1H, ddd,  $J = 14.5, 8.0, 3.0$  Hz, CH), 2.36–2.26 (1H, m, CH), 1.29 (9H, s, *t*-Bu); <sup>13</sup>C NMR (100 MHz, CDCl<sub>3</sub>)  $\delta = 173.5$  (C=O), 153.9 (C=O), 139.6 (C), 137.8 (C), 132.8 (C), 132.2 (C), 131.5 (C), 128.4 (CH), 127.6 (CH), 127.3 (CH), 127.3 (CH), 126.5 (CH), 125.9 (CH), 125.9 (CH), 125.4 (CH), 125.3 (CH), 124.4 (CH), 123.5 (CH), 82.2 (C), 68.9 (C), 52.5 (CH<sub>3</sub>), 39.0 (CH<sub>2</sub>), 27.9 (CH<sub>3</sub>), 25.2 (CH<sub>2</sub>); HRMS (ES) Found: MNa<sup>+</sup>, 440.1835. C<sub>26</sub>H<sub>27</sub>NO<sub>4</sub>Na requires MNa<sup>+</sup>, 440.1832; LRMS  $m/z$  (ES) 440 (15%), 318 (100); er 78:22, determined by CSP-HPLC (Lux Cellulose-2 column, major component eluted at 13.1 min);  $[\alpha]_D^{24} +30.5$  (0.6, CHCl<sub>3</sub>).

In addition, a mixture (ratio 2.5:1 or 1:2.5) of the tetrahydroquinolines shown below were isolated (59 mg, 49%):

***tert*-Butyl 2-[1-(Methoxycarbonyl)naphthalen-2-yl]-1,2,3,4-tetrahydroquinoline-1-carboxylate** and ***tert*-Butyl 2-[3-(Methoxycarbonyl)naphthalen-2-yl]-1,2,3,4-tetrahydroquinoline-1-carboxylate**

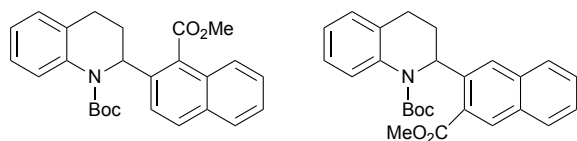

$R_f$  0.26 [petrol–EtOAc (9:1)]; FT-IR  $\nu_{\max}$  (ATR)/cm<sup>-1</sup> 3025, 2970, 2920, 2845, 1700, 1490; <sup>1</sup>H NMR (400 MHz, CDCl<sub>3</sub>)  $\delta = 7.48$ – $7.36$  (1H, m, CH), 7.31–7.05 (7H, m,  $7 \times$  CH), 6.64–6.42 (2H, m,  $2 \times$  CH), 5.21 (0.3H, br s, CH), 4.83 (0.7H, s, CH), 3.60 (2.1H, s, CH<sub>3</sub>), 3.29 (0.9H, s, CH<sub>3</sub>), 3.12–2.70 (4H, m,  $2 \times$  CH<sub>2</sub>), 1.52–1.36 (9H, m, *t*-Bu); <sup>13</sup>C NMR (100 MHz, CDCl<sub>3</sub>, some carbons could not be observed)  $\delta = 171.5$

(C=O), 152.7 (C=O), 139.7 (C), 135.1 (C), 133.0 (C), 131.3 (C), 128.2 (CH), 128.1 (CH), 127.9 (CH), 127.7 (CH), 127.6 (CH), 127.3 (CH), 127.2 (CH), 126.2 (CH), 125.9 (CH), 125.1 (CH), 124.9 (CH), 81.6 (C), 81.2 (C), 52.6 (CH<sub>3</sub>), 52.0 (CH<sub>3</sub>), 47.5 (CH), 29.7 (2 × CH<sub>2</sub>), 28.2 (CH<sub>3</sub>), 28.1 (CH<sub>3</sub>), 27.5 (CH<sub>2</sub>), 27.3 (CH<sub>2</sub>); HRMS (ES) Found: MNa<sup>+</sup>, 440.1840 and 440.1846. C<sub>26</sub>H<sub>27</sub>NO<sub>4</sub>Na requires MNa<sup>+</sup>, 440.1832.

This result indicates that, even with methyl chloroformate then the electrophile can sometimes prefer to react on the aromatic ring rather than at C-2 of the tetrahydroquinoline.

We have observed similar results with MeOCOC<sub>2</sub>H<sub>5</sub> with a lithiated azepane ring.<sup>11</sup> We believe that the results fit best with lithiation at C-2 but with reaction either at C-2 or at the aromatic ring ( $\eta^3$  allyl/benzyl type reactivity). To probe this further, other experiments were conducted, whereby the organolithium generated from the naphthyl compound **2e** was trapped with methyl chloroformate or with iodomethane. This gave only the alpha-substituted product **7** (47% yield) or the alpha-methylated product shown below (73% yield), respectively.

These results support the formation of the 2-lithiated intermediate and that reaction occurs at C-2 with most electrophiles. However, with some electrophiles (particularly cyanoformates – see formation of **4**) or under some conditions (such as in the presence of sparteine – see above) then electrophilic quench can occur on the aromatic ring.

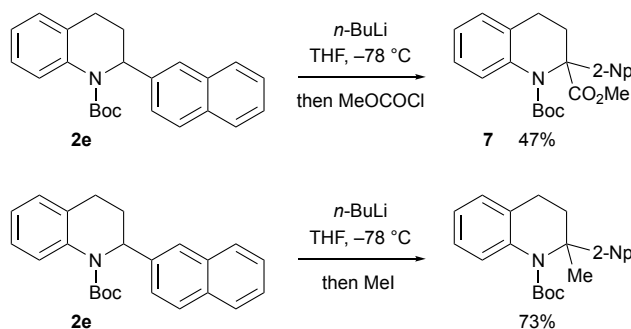



Data for compound **7** are identical to that described above. Data for the methylated compound are given below:

***tert*-Butyl 2-Methyl-2-(naphthalen-2-yl)-1,2,3,4-tetrahydroquinoline-1-carboxylate**

*n*-BuLi (0.13 mL, 0.31 mmol, 2.4 M in hexanes) was added to the carbamate **2e** (91 mg, 0.25 mmol) in THF (2 mL) at  $-78$  °C. After 6 min, iodomethane (0.06 mL, 0.89 mmol) was added and the mixture was allowed to warm to room temperature over 16 h then MeOH (1 mL) was added. Purification by column chromatography on silica gel, eluting with petrol–EtOAc (95:5), gave the carbamate (70 mg, 73%) as an oil;  $R_f$  0.61 [petrol–EtOAc (9:1)]; FT-IR  $\nu_{\max}$  (ATR)/ $\text{cm}^{-1}$  3065, 3055, 2970, 2965, 1695, 1490;  $^1\text{H}$  NMR (400 MHz,  $\text{CDCl}_3$ )  $\delta$  = 7.90–7.80 (4H, m, 4  $\times$  CH), 7.77 (1H, d,  $J$  = 8.0 Hz, CH), 7.60–7.53 (1H, m, CH), 7.53–7.43 (2H, m, 2  $\times$  CH), 7.32–7.24 (1H, m, CH), 7.14 (1H, d,  $J$  = 7.5 Hz, CH), 7.08–7.00 (1H, m, CH), 2.86–2.72 (1H, m, CH), 2.54 (1H, dt,  $J$  = 15.0, 4.5 Hz, CH), 2.17 (3H, s,  $\text{CH}_3$ ), 2.11–2.00 (2H, m,  $\text{CH}_2$ ), 1.15 (9H, s, *t*-Bu);  $^{13}\text{C}$  NMR (100 MHz,  $\text{CDCl}_3$ )  $\delta$  = 154.5 (C=O), 146.8 (C), 139.1 (C), 133.3 (C), 133.0 (C), 131.9 (C), 128.0 (CH), 127.8 (CH), 127.4 (2  $\times$  CH), 126.1 (CH), 126.0 (CH), 125.4 (CH), 124.8 (CH), 123.7 (CH), 123.0 (CH), 122.8 (CH), 80.9 (C), 62.9 (C), 44.4 ( $\text{CH}_2$ ), 27.9 ( $\text{CH}_3$ ), 27.6 ( $\text{CH}_3$ ), 25.1 ( $\text{CH}_2$ ); HRMS (ES) Found:  $\text{MNa}^+$ , 396.1938.  $\text{C}_{25}\text{H}_{27}\text{NO}_2\text{Na}$  requires  $\text{MNa}^+$ , 396.1934; LRMS  $m/z$  (ES) 396 (10%,  $\text{MNa}^+$ ), 318 (100).

### 1.3 Lithiation-trapping of enantioenriched tetrahydroquinolines

*General procedure:*

*n*-BuLi (1.2 equiv., 2.5 M solution in hexanes) was added dropwise to a solution of enantioenriched **2a**, **2c** or **2d** (0.16 mmol) in THF (0.65 mL, 0.25 M) at  $-78$  °C. After 6 min, the electrophile (0.56 mmol, 3.5 equiv.) was added dropwise. The mixture was allowed to warm to room temperature over 16 h then MeOH (1 mL) was added. The solvent was evaporated and the residue was purified by column chromatography on silica gel.

#### **(R)**-1-*tert*-Butyl 2-Methyl 2-Phenyl-3,4-dihydroquinoline-1,2(2*H*)-dicarboxylate **3a**

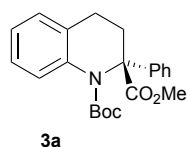

Using the general procedure, tetrahydroquinoline (*R*)-**2a** (50 mg, 0.16 mmol, er 97:3), *n*-BuLi (76  $\mu$ L, 0.19 mmol, 2.5 M in hexanes) and methyl chloroformate (45  $\mu$ L, 0.6 mmol) gave, after purification by column chromatography on silica gel, eluting with petrol–EtOAc (95:5), the carbamate (*R*)-**3a** (53 mg, 90%) as an amorphous solid; m.p. 74–76 °C; er 97:3, determined by CSP HPLC (major component eluted at 17.9 min);  $[\alpha]_D^{24} +94.1$  (2.2, CHCl<sub>3</sub>).

#### **(R)**-1-*tert*-Butyl 2-Ethyl 2-Phenyl-3,4-dihydroquinoline-1,2(2*H*)-dicarboxylate **3b**

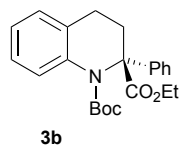

Using the general procedure, tetrahydroquinoline (*R*)-**2a** (50 mg, 0.16 mmol, er 97:3), *n*-BuLi (76  $\mu$ L, 0.19 mmol, 2.5 M in hexanes) and ethyl chloroformate (54  $\mu$ L, 0.6 mmol) gave, after purification by column chromatography on silica gel, eluting with petrol–EtOAc (95:5), the carbamate (*R*)-**3b** (48 mg, 78%) as an oil; er 97:3, determined by CSP HPLC (major component eluted at 11.8 min);  $[\alpha]_D^{23} +93.9$  (0.83, CHCl<sub>3</sub>).

**(*R*)-*tert*-Butyl 2-Methyl-2-phenyl-3,4-dihydroquinoline-1(2*H*)-carboxylate **3e****

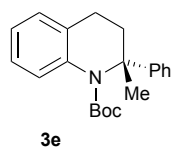

Using the general procedure, tetrahydroquinoline (*R*)-**2a** (50 mg, 0.16 mmol, er 97:3), *n*-BuLi (76  $\mu$ L, 0.19 mmol, 2.5 M in hexanes) and iodomethane (35  $\mu$ L, 0.6 mmol) gave, after purification by column chromatography on silica gel, eluting with petrol–EtOAc (95:5), the carbamate **3e** (48 mg, 91%) as an oil; er 94:6, determined by CSP HPLC (major component eluted at 6.5 min);  $[\alpha]_D^{24} +20.9$  (2.2, CHCl<sub>3</sub>).

**(*R*)-*tert*-Butyl 2-(2-Methoxy-2-oxoethyl)-2-phenyl-1,2,3,4-tetrahydroquinoline-1-carboxylate **3g****

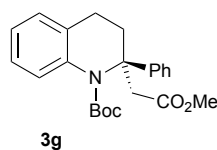

Using the general procedure, tetrahydroquinoline (*S*)-**2a** (30 mg, 0.1 mmol, er 92:8), *n*-BuLi (48  $\mu$ L, 0.11 mmol, 2.4 M in hexanes) and methyl bromoacetate (32  $\mu$ L, 0.33 mmol) gave, after purification by column chromatography on silica gel, eluting with petrol–EtOAc (97:3), the carbamate **3g** (26 mg, 71%) as an amorphous solid; m.p. 96–98  $^{\circ}$ C; er 92:8, determined by CSP HPLC (major component eluted at 18.1 min);  $[\alpha]_{\text{D}}^{25}$  +50.6 (1.7,  $\text{CHCl}_3$ ).

**(*S*)-tert-Butyl 6-Chloro-2-methyl-2-phenyl-1,2,3,4-tetrahydroquinoline-1-carboxylate **8****

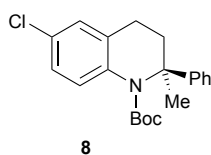

Using the general procedure, tetrahydroquinoline (*S*)-**2c** (34 mg, 0.10 mmol, er 92:8), *n*-BuLi (50  $\mu$ L, 0.12 mmol, 2.4 M in hexanes) and iodomethane (21  $\mu$ L, 0.34 mmol) gave, after purification by column chromatography on silica gel, eluting with petrol–EtOAc (97:3), the carbamate (*S*)-**8** (24 mg, 69%) as an oil; er 87:13, determined by CSP HPLC with a Daicel Chiralpak IA column using *n*-hexane–isopropanol (99:1 v/v) (major component eluted at 9.1 min);  $[\alpha]_{\text{D}}^{25}$  –18.9 (1.1,  $\text{CHCl}_3$ );  $R_f$  0.63 [petrol–EtOAc (94:6)]; FT-IR  $\nu_{\text{max}}$  (film)/ $\text{cm}^{-1}$  3065, 2975, 1700, 1600, 1480;  $^1\text{H}$  NMR (400 MHz,  $\text{CDCl}_3$ )  $\delta$  = 7.66 (1H, d,  $J$  = 9.0 Hz, CH), 7.38–7.31 (4H, m, 4  $\times$  CH), 7.27–7.21 (1H, m, CH), 7.18 (1H, dd,  $J$  = 9.0, 2.5 Hz, CH), 7.09 (1H, d,  $J$  = 2.5 Hz, CH), 2.78–2.64 (1H, m, CH), 2.53–2.41 (1H, m, CH), 2.02 (3H, s,  $\text{CH}_3$ ), 1.99–1.92 (2H, m, 2  $\times$  CH), 1.18 (9H, s, *t*-Bu);  $^{13}\text{C}$  NMR (100 MHz,  $\text{CDCl}_3$ )  $\delta$  = 154.3 (C=O), 148.9 (C), 137.7

(C), 134.5 (C), 128.2 (CH), 127.6 (C), 127.1 (CH), 126.0 (2 × CH), 124.6 (2 × CH), 81.2 (C), 62.8 (C), 44.0 (CH<sub>2</sub>), 27.9 (CH<sub>3</sub>), 27.5 (CH<sub>3</sub>), 24.8 (CH<sub>2</sub>); HRMS (ES) Found MH<sup>+</sup>, 380.1394. C<sub>21</sub>H<sub>24</sub><sup>35</sup>ClNaNO<sub>2</sub> requires MH<sup>+</sup>, 380.1388; Found MH<sup>+</sup>, 382.1369. C<sub>21</sub>H<sub>24</sub><sup>37</sup>ClNaNO<sub>2</sub> requires MH<sup>+</sup>, 382.1366; LRMS *m/z* (ES) 382 (<5%), 380 (5), 304 (30), 302 (100).

**(*S*)-*tert*-Butyl 2-Ethyl-2-(4-fluorophenyl)-1,2,3,4-tetrahydroquinoline-1,2-dicarboxylate **9****

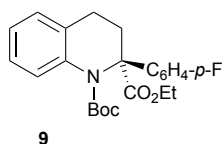

Using the general procedure, tetrahydroquinoline (*S*)-**2d** (25 mg, 0.08 mmol, er 94:6), *n*-BuLi (36 μL, 0.09 mmol, 2.5 M in hexanes) and ethyl chloroformate (25 μL, 0.26 mmol) gave, after purification by column chromatography on silica gel, eluting with petrol–EtOAc (97:3), the carbamate (*S*)-**9** (26 mg, 89%) as an amorphous solid; m.p. 34–36 °C; er 93:7, determined by CSP HPLC with a Lux Cellulose-1 column using *n*-hexane–isopropanol (99.5:0.5 v/v) (major component eluted at 11.0 min); [α]<sub>D</sub><sup>23</sup> –75.3 (1.0, CHCl<sub>3</sub>).

***cis*-3a-(Naphthalen-2-yl)-3-phenyl-3H,4H,5H-[1,3]oxazolo[3,4-a]quinolin-1-one **10a** and *trans*-3a-(Naphthalen-2-yl)-3-phenyl-3H,4H,5H-[1,3]oxazolo[3,4-a]quinolin-1-one **10b****

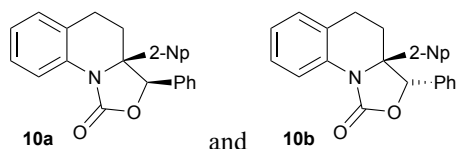

Using the general procedure, tetrahydroquinoline (*S*)-**2e** (35 mg, 0.10 mmol, er 96:4), *n*-BuLi (50  $\mu$ L, 0.12 mmol, 2.4 M in hexanes) and benzaldehyde (20  $\mu$ L, 0.2 mmol), gave, after purification by column chromatography on silica gel, eluting with petrol–EtOAc (95:5), the carbamate (*3R,3aS*)-**10a** (16 mg, 42%) as an amorphous solid and the carbamate (*3S,3aS*)-**10b** (8 mg, 20%) as a gum:

Data for **10a**:

m.p. 172–174 °C; er 95.5:4.5, determined by CSP HPLC (major component eluted at 35 min);  $[\alpha]_D^{24} = -228.9$  (0.6, CHCl<sub>3</sub>);  $R_f$  0.15 [petrol–EtOAc (9:1)]; FT-IR  $\nu_{\max}$  (film)/cm<sup>-1</sup> 3060, 2970, 2885, 2880, 1745, 1575, 1490, 1455; <sup>1</sup>H NMR (400 MHz, CDCl<sub>3</sub>)  $\delta$  = 8.80 (1H, d,  $J$  = 8.5 Hz, CH), 7.73–7.60 (2H, m, 2  $\times$  CH), 7.48–7.31 (5H, m, 5  $\times$  CH), 7.23–7.14 (1H, m, CH), 7.14–7.05 (2H, m, 2  $\times$  CH), 7.05–6.94 (4H, m, 4  $\times$  CH), 6.62 (1H, d,  $J$  = 7.0 Hz, CH), 5.61 (1H, s, CH), 3.06–2.93 (1H, m, CH), 2.91–2.74 (1H, m, CH), 2.52–2.34 (2H, m, 2  $\times$  CH); <sup>13</sup>C NMR (100 MHz, CDCl<sub>3</sub>)  $\delta$  = 153.4 (C=O), 134.9 (C), 133.4 (C), 133.4 (C), 132.7 (C), 132.3 (C), 129.2 (CH), 128.8 (CH), 128.3 (CH), 128.1 (2  $\times$  CH), 127.8 (CH), 127.5 (CH), 127.3 (CH), 126.7 (3  $\times$  CH), 126.4 (CH), 126.2 (CH), 124.5 (C), 123.6 (CH), 123.5 (CH), 118.0 (CH), 86.9 (CH), 68.8 (C), 30.8 (CH<sub>2</sub>), 24.5 (CH<sub>2</sub>); HRMS (ES) Found: MH<sup>+</sup>, 392.1649. C<sub>27</sub>H<sub>22</sub>NO<sub>2</sub> requires MH<sup>+</sup>, 392.1645; LRMS  $m/z$  (ES) 414 (10%), 392 (100).

Resolution between the enantiomers of the carbamate *cis*-**10a** was achieved using a Beckman system fitted with a Daicel ChiralPak IA column (250 mm  $\times$  460 mm i.d.) as the stationary phase with a mixture of *n*-hexane:isopropanol (95:5 v/v) as the mobile phase at a flow rate of 0.7 mL·min<sup>-1</sup>; ambient temperature, detection by UV

absorbance at 254 nm. Injection volume was 20  $\mu\text{L}$  of the sample prepared in a  $2\text{ g}\cdot\text{L}^{-1}$  solution of the eluent. Under these conditions, the components were eluted at 33 min and 50 min.

The stereochemistry of the major isomer was determined on the basis of an X-ray crystal structure of the racemic product, formed by using *n*-BuLi in THF followed by the addition of PhCHO. This gave the same two products, 64% yield, ratio 2:1 and the major isomer had m.p. 160–162  $^{\circ}\text{C}$ . The X-ray data for this compound have been submitted to CCDC 1578268.

Data for **10b**:

er 95.5:4.5, determined by CSP HPLC (major component eluted at 38.7 min);  $[\alpha]_{\text{D}}^{24} = -17.2$  (0.2,  $\text{CHCl}_3$ );  $R_f$  0.14 [petrol–EtOAc (95:5)]; FT-IR  $\nu_{\text{max}}$  (film)/ $\text{cm}^{-1}$  3060, 3035, 2965, 2955, 2930, 2845, 1745, 1600, 1580, 1490;  $^1\text{H}$  NMR (400 MHz,  $\text{CDCl}_3$ ) 8.43 (1H, dd,  $J = 8.5, 1.0$  Hz, CH), 7.93 (1H, d,  $J = 8.5$  Hz, CH), 7.89–7.83 (1H, m, CH), 7.82–7.76 (1H, m, CH), 7.73 (1H, d,  $J = 1.5$  Hz, CH), 7.56–7.44 (6H, m,  $6 \times \text{CH}$ ), 7.42–7.30 (3H, m,  $3 \times \text{CH}$ ), 7.02 (1H, td,  $J = 7.5, 1.0$  Hz CH), 6.93 (1H, d,  $J = 7.5$  Hz, CH), 5.59 (1H, s, CH), 2.72–2.62 (1H, m, CH), 2.47–2.34 (1H, m, CH), 2.12 (1H, ddd,  $J = 13.5, 5.5, 1.5$  Hz, CH), 1.73 (1H, td,  $J = 13.5, 5.5$  Hz, CH);  $^{13}\text{C}$  NMR (100 MHz,  $\text{CDCl}_3$ )  $\delta = 155.2$  (C=O), 138.8 (C), 135.1 (C), 134.8 (C), 133.2 (C), 132.8 (C), 129.7 (CH), 129.1 (CH), 129.0 (CH), 128.7 (CH), 128.3 (CH), 127.6 (CH), 127.2 (CH), 126.7 (CH), 126.7 (CH), 126.5 (CH), 125.4 (C), 125.0 (CH), 124.1 (CH), 122.5 (CH), 120.4 (CH), 85.3 (CH), 67.6 (C), 27.8 ( $\text{CH}_2$ ), 24.3 ( $\text{CH}_2$ ); HRMS (ES) Found:  $\text{MH}^+$ , 392.1657.  $\text{C}_{27}\text{H}_{22}\text{NO}_2$  requires  $\text{MH}^+$ , 392.1645; LRMS  $m/z$  (ES) 414 (5%), 392 (100).

Resolution between the enantiomers of the carbamate *trans*-**10b** was achieved using a Beckman system fitted with a Daicel ChiralPak IA (250 mm  $\times$  460 mm i.d.) as the

stationary phase with a mixture of *n*-hexane:isopropanol (95:5 v/v) as the mobile phase at a flow rate of 0.7 mL·min<sup>-1</sup>; ambient temperature, detection by UV absorbance at 254 nm. Injection volume was 20 μL of the sample prepared in a 2 g·L<sup>-1</sup> solution of the eluent. Under these conditions, the components were eluted at 38 min and 96 min.

#### 1.4 Removal of the Boc group

##### (*S*)-*tert*-Butyl 2-Phenyl-1,2,3,4-tetrahydroquinoline-2-carboxylate **11**

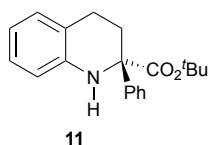

*n*-BuLi (43 μL, 0.10 mmol, 2.4 M in hexanes) was added to the tetrahydroquinoline (*S*)-**2a** (26 mg, 0.09 mmol, er 98:2) in THF (2 mL) at -78 °C. After 6 min, BEt<sub>3</sub> (0.171 mL, 0.171 mmol, 1.0 M in hexanes) was added. The mixture was allowed to warm to room temperature over 16 h and MeOH (1 mL) was added. The solvent was evaporated and the residue was purified by column chromatography on silica gel, eluting with petrol–EtOAc (97:3), to give the amine (*S*)-**11** (19 mg, 71%) as an amorphous white solid; m.p. 78–80 °C; er 98:2, determined by CSP HPLC (major component eluted at 11.8 min); [α]<sub>D</sub><sup>24</sup> = -94.2 (0.4, CHCl<sub>3</sub>); R<sub>f</sub> 0.71 [petrol–EtOAc (9:1)]; FT-IR ν<sub>max</sub> (film)/cm<sup>-1</sup> 3400, 3055, 2980, 2930, 1720, 1480; <sup>1</sup>H NMR (400 MHz, CDCl<sub>3</sub>) δ = 7.60–7.54 (2H, m, 2 × CH), 7.40–7.33 (2H, m, 2 × CH), 7.33–7.27 (1H, m, CH), 7.11–7.05 (1H, m, CH), 6.96 (1H, d, *J* = 7.5 Hz, CH), 6.77–6.72 (1H, m, CH), 6.68 (1H, td,



$J = 7.5, 1.0$  Hz, CH), 4.95 (1H, s, NH), 2.78–2.69 (1H, m, CH), 2.56–2.43 (2H, m, 2 × CH), 2.41–2.31 (1H, m, CH), 1.46 (9H, s, *t*-Bu);  $^{13}\text{C}$  NMR (100 MHz,  $\text{CDCl}_3$ )  $\delta = 172.5$  (C=O), 143.0 (C), 142.7 (C), 129.0 (CH), 128.5 (CH), 127.5 (CH), 127.0 (CH), 125.7 (CH), 120.4 (C), 117.4 (CH), 114.3 (CH), 82.2 (C), 63.5 (C), 31.2 ( $\text{CH}_2$ ), 27.9 ( $\text{CH}_3$ ), 24.0 ( $\text{CH}_2$ ); HRMS (ES) Found:  $\text{MH}^+$ , 310.1800.  $\text{C}_{20}\text{H}_{24}\text{NO}_2$  requires  $\text{MH}^+$ , 310.1802; LRMS  $m/z$  (ES) 310 (100%), 254 (80); Found: C, 77.57; H, 7.65; N, 4.28.  $\text{C}_{20}\text{H}_{23}\text{NO}_2$  requires C, 77.64; H, 7.49; N, 4.53.

Resolution between the enantiomers of the carbamate **11** was achieved using a Beckman system fitted with a Daicel ChiralPak IA column (250 mm × 4.60 mm i.d.) as the stationary phase with a mixture of *n*-hexane:isopropanol (99:1 v/v) as the mobile phase at a flow rate of 1 mL·min<sup>-1</sup>; ambient temperature, detection by UV absorbance at 254 nm. Injection volume was 20  $\mu\text{L}$  of the sample prepared in a 2 g·L<sup>-1</sup> solution of the eluent. Under these conditions, the components were eluted at 10 min and 12 min.

### (*R*)-Methyl 2-(2-Phenyl-1,2,3,4-tetrahydroquinolin-2-yl)acetate **12**

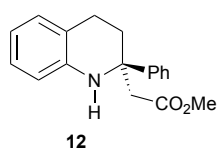

Trifluoroacetic acid (0.03 mL, 0.37 mmol) was added to the tetrahydroquinoline **3g** (14 mg, 0.037 mmol, er 92:8) in  $\text{CH}_2\text{Cl}_2$  (5 mL) at room temperature. After 3 days, the solvent was evaporated and aqueous NaOH (2 mL, 1 M) was added. The mixture was extracted with  $\text{CH}_2\text{Cl}_2$  (2 × 25 mL). The combined organic layers were dried ( $\text{MgSO}_4$ ), filtered, and the solvent was evaporated. The residue was purified by column chromatography on silica gel, eluting with petrol–EtOAc (97:3), to give the amine (*R*)-**12** (7 mg, 69%) as an oil; er 88:12, determined by CSP HPLC (major component

eluted at 24.6 min);  $[\alpha]_{\text{D}}^{20} = -92.8$  (0.3,  $\text{CHCl}_3$ );  $R_f$  0.55 [petrol–EtOAc (9:1)]; FT-IR  $\nu_{\text{max}}$  (film)/ $\text{cm}^{-1}$  3405 (N–H), 3050, 3020, 2955, 2910, 2840, 1715, 1605, 1480;  $^1\text{H}$  NMR (400 MHz,  $\text{CDCl}_3$ )  $\delta = 7.43\text{--}7.37$  (2H, m,  $2 \times \text{CH}$ ), 7.32 (2H, t,  $J = 7.0$  Hz,  $2 \times \text{CH}$ ), 7.27–7.20 (1H, m, CH), 7.09 (1H, t,  $J = 7.5$  Hz, CH), 6.92 (1H, d,  $J = 7.5$  Hz, CH), 6.74 (1H, d,  $J = 8.0$  Hz, CH), 6.69–6.61 (1H, m, CH), 5.64 (1H, s, NH), 3.53 (3H, s,  $\text{OCH}_3$ ), 3.14 (1H, d,  $J = 15.5$  Hz, CH), 2.90 (1H, d,  $J = 15.5$  Hz, CH), 2.61 (1H, dt,  $J = 16.5, 4.5$  Hz, CH), 2.41–2.29 (1H, m, CH), 2.28–2.17 (1H, m, CH), 2.06 (1H, td,  $J = 12.0, 4.5$  Hz, CH);  $^{13}\text{C}$  NMR (100 MHz,  $\text{CDCl}_3$ )  $\delta = 171.9$  (C=O), 145.0 (C), 143.5 (C), 129.1 (CH), 128.4 (CH), 127.2 (CH), 126.7 (CH), 125.7 (CH), 120.2 (C), 116.9 (CH), 114.0 (CH), 56.8 (C), 51.6 ( $\text{CH}_3$ ), 46.3 ( $\text{CH}_2$ ), 35.2 ( $\text{CH}_2$ ), 23.7 ( $\text{CH}_2$ ); HRMS (ES) Found:  $\text{MH}^+$ , 282.1489.  $\text{C}_{18}\text{H}_{20}\text{NO}_2$  requires  $\text{MH}^+$ , 282.1489; LRMS  $m/z$  (ES) 282 (100).

Resolution between the enantiomers of the carbamate **12** was achieved using a Beckman system fitted with a Daicel ChiralCel OJ column (250 mm  $\times$  4.60 mm i.d.) as the stationary phase with a mixture of *n*-hexane:isopropanol (99:1 v/v) as the mobile phase at a flow rate of 1  $\text{mL}\cdot\text{min}^{-1}$ ; ambient temperature, detection by UV absorbance at 254 nm. Injection volume was 20  $\mu\text{L}$  of the sample prepared in a 2  $\text{g}\cdot\text{L}^{-1}$  solution of the eluent. Under these conditions, the components were eluted at 25 min and 36 min.

## 2. ReactIR traces for lithiation of tetrahydroquinoline **2a**

Racemic lithiation:

THF (12 mL) was added to a flask equipped with a stirrer bar and ReactIR probe at room temperature under Ar. After cooling to  $-78\text{ }^{\circ}\text{C}$ , a solution of *N*-Boc-2-phenyltetrahydroquinoline **2a** (619 mg, 2.0 mmol) in THF (2 mL) was added dropwise. The solution was stirred for about 8 min (to verify stability of readout on ReactIR). Then, *n*-BuLi (1.0 mL, 2.5 mmol, 2.5 M in hexane) was added dropwise. The solution was stirred for 30 min.

For *N*-Boc-2-phenyltetrahydroquinoline **2a**, a peak at  $1705\text{ cm}^{-1}$  was observed which was assigned to  $\nu_{\text{C=O}}$  (blue line in 2D plots below). After addition of *n*-BuLi, a new peak at  $1641\text{ cm}^{-1}$  appeared which was assigned to  $\nu_{\text{C=O}}$  of lithiated intermediate (red line in 2D plots below). Complete lithiation of *N*-Boc-2-phenyltetrahydroquinoline **2a** to lithiated intermediate was observed within a few min.

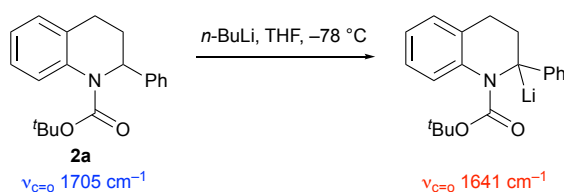

2D plot (time in minutes):

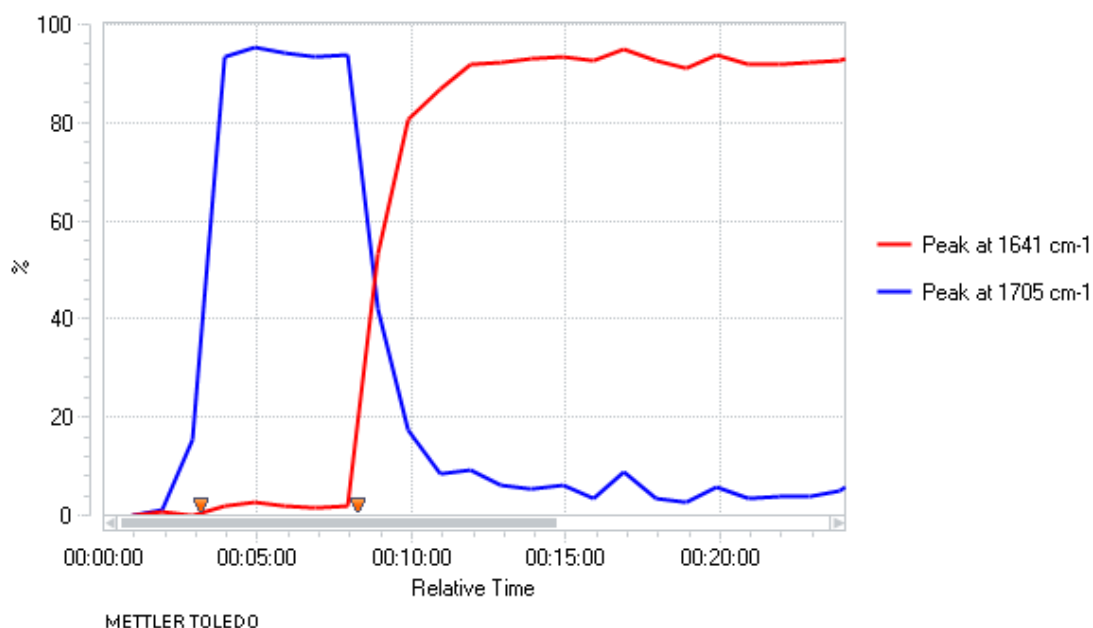

3D plot (time in h:min:sec):

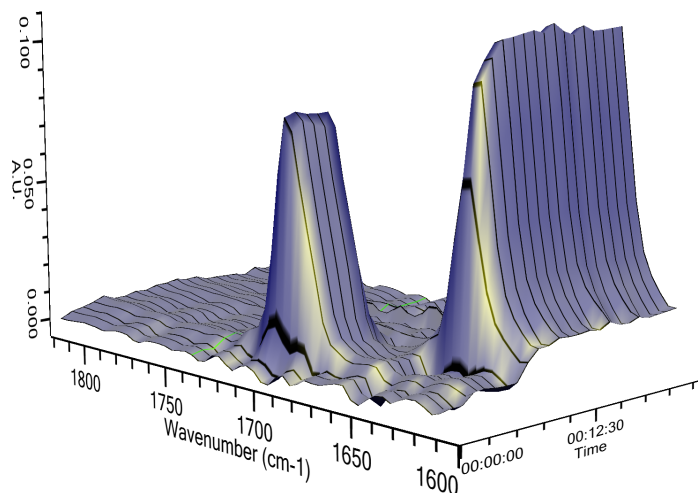

METTLER TOLEDO

Kinetic resolution:

An experiment was run in which 0.7 equiv. of *n*-BuLi/(–)-sparteine was added to the tetrahydroquinoline **2a** in PhMe at –78 °C and the reaction was monitored:

Toluene (12 mL) was added to a flask equipped with a stirrer bar and ReactIR probe at room temperature under Ar. After cooling to –78 °C, a solution of *N*-Boc-2-phenyltetrahydroquinoline **2a** (619 mg, 2.0 mmol) in THF (2 mL) was added dropwise. The solution was stirred for 10 min (to verify stability of readout on ReactIR). Then, a solution of pre-mixed *n*-BuLi/(–)-sparteine (0.58 mL, 1.4 mmol, 2.5 M in hexane for *n*-BuLi; 0.33 g, 1.4 mmol for chiral ligand) in toluene (2 mL) was added dropwise.

The ReactIR plot is shown below (time in h:min:sec):

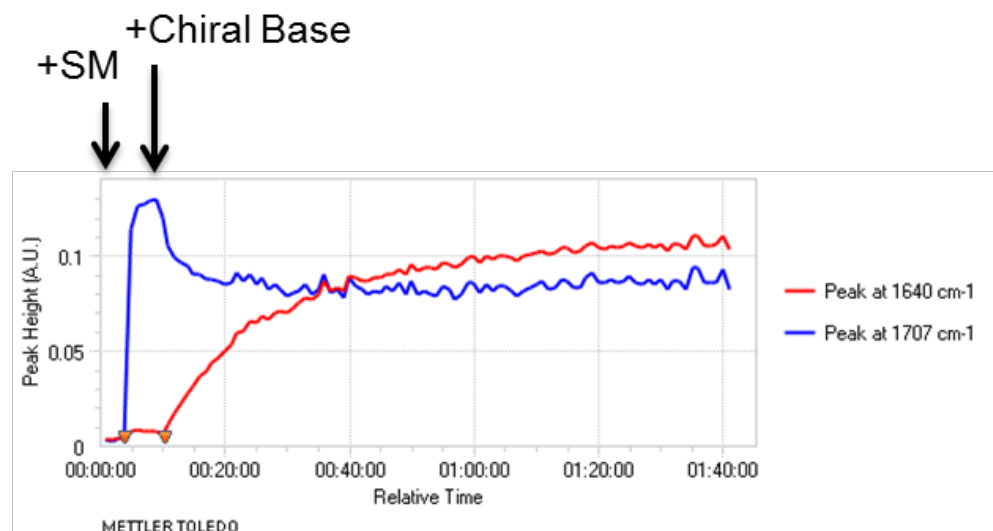

The result shows initial rapid but partial loss of the peak at  $1707\text{ cm}^{-1}$  followed by only slight further slow loss over time and this was complemented by the formation of a peak at  $1640\text{ cm}^{-1}$  (representing the carbonyl of the organolithium intermediate) that was formed rapidly at first and then much more slowly.

On the basis of these *in situ* ReactIR spectroscopic studies, we conducted the lithiation of *rac*-**2a** by using 0.7 equiv. of *n*-BuLi/(–)-sparteine at  $-78\text{ }^{\circ}\text{C}$  in toluene for 1 h followed by quenching with MeOCOCl. However, only 26% yield of 2,2-disubstituted product **3a** (er 92:8) was produced, together with recovered starting material **2a** [er 18:82 (*S*:*R*)] in 67% yield. These results indicate that the kinetic resolution is best performed with more than 0.7 equiv. of the chiral base.

3. X-ray data for compound (*R*)-3a

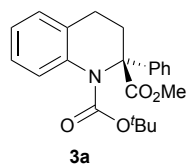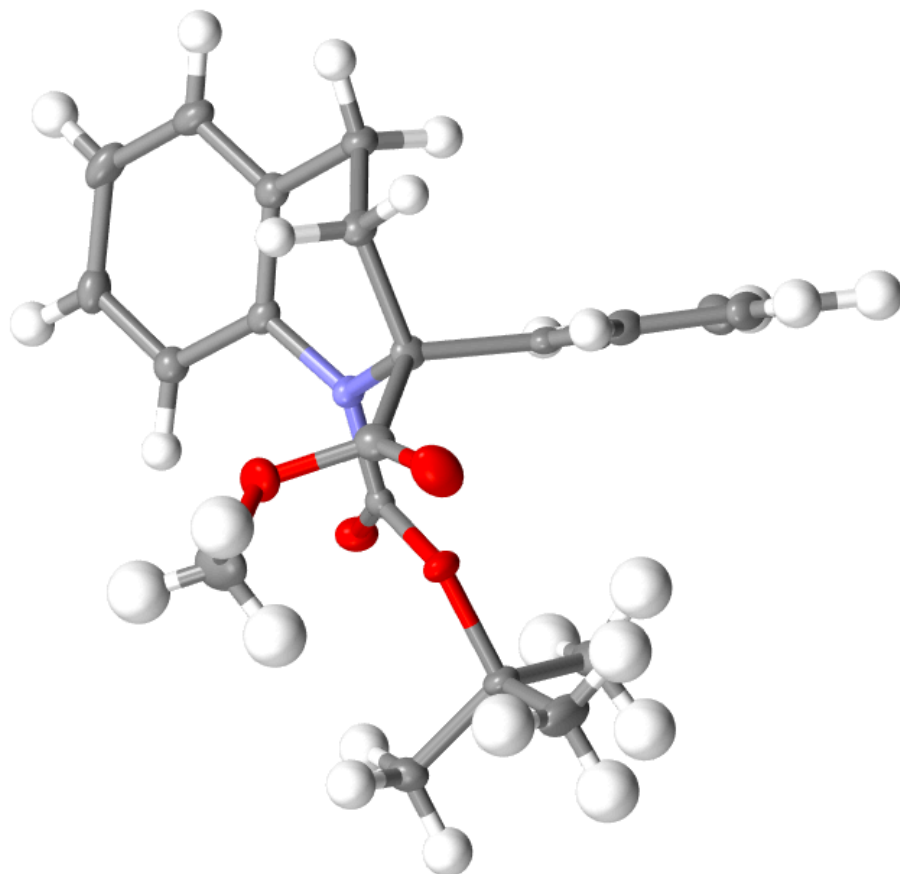

Table S-1. Crystal data and structure refinement for **3a**.

|                                         |                                                                        |                       |
|-----------------------------------------|------------------------------------------------------------------------|-----------------------|
| Identification code                     | carter1_0m                                                             |                       |
| Empirical formula                       | C <sub>22</sub> H <sub>25</sub> N O <sub>4</sub>                       |                       |
| Formula weight                          | 367.43                                                                 |                       |
| Temperature                             | 100(2) K                                                               |                       |
| Wavelength                              | 1.54178 $\approx$                                                      |                       |
| Crystal system                          | Orthorhombic                                                           |                       |
| Space group                             | P2 <sub>1</sub> 2 <sub>1</sub> 2 <sub>1</sub>                          |                       |
| Unit cell dimensions                    | a = 10.3192(3) $\approx$                                               | $\alpha = 90^\circ$ . |
|                                         | b = 11.0867(4) $\approx$                                               | $\beta = 90^\circ$ .  |
|                                         | c = 17.4057(6) $\approx$                                               | $\gamma = 90^\circ$ . |
| Volume                                  | 1991.31(12) $\approx^3$                                                |                       |
| Z                                       | 4                                                                      |                       |
| Density (calculated)                    | 1.226 Mg/m <sup>3</sup>                                                |                       |
| Absorption coefficient                  | 0.680 mm <sup>-1</sup>                                                 |                       |
| F(000)                                  | 784                                                                    |                       |
| Crystal size                            | 0.300 x 0.200 x 0.200 mm <sup>3</sup>                                  |                       |
| Theta range for data collection         | 4.729 to 66.627 $^\circ$ .                                             |                       |
| Index ranges                            | -12 $\leq$ h $\leq$ 12, -13 $\leq$ k $\leq$ 13, -20 $\leq$ l $\leq$ 20 |                       |
| Reflections collected                   | 25795                                                                  |                       |
| Independent reflections                 | 3512 [R(int) = 0.0414]                                                 |                       |
| Completeness to theta = 66.627 $^\circ$ | 99.7 %                                                                 |                       |
| Absorption correction                   | Semi-empirical from equivalents                                        |                       |
| Max. and min. transmission              | 0.89 and 0.79                                                          |                       |
| Refinement method                       | Full-matrix least-squares on F <sup>2</sup>                            |                       |
| Data / restraints / parameters          | 3512 / 0 / 248                                                         |                       |
| Goodness-of-fit on F <sup>2</sup>       | 1.095                                                                  |                       |
| Final R indices [I > 2 $\sigma$ (I)]    | R1 = 0.0280, wR2 = 0.0682                                              |                       |
| R indices (all data)                    | R1 = 0.0296, wR2 = 0.0691                                              |                       |
| Absolute structure parameter            | 0.03(6)                                                                |                       |
| Extinction coefficient                  | n/a                                                                    |                       |
| Largest diff. peak and hole             | 0.138 and -0.193 e. $\approx^3$                                        |                       |

CCDC 1578266

Table S-2. Atomic coordinates ( $\times 10^4$ ) and equivalent isotropic displacement parameters ( $\approx^2 \times 10^3$ ) for **3a**.  $U(\text{eq})$  is defined as one third of the trace of the orthogonalized  $U^{ij}$  tensor.

|       | x       | y        | z        | $U(\text{eq})$ |
|-------|---------|----------|----------|----------------|
| O(1)  | 7820(1) | 73(1)    | 8262(1)  | 16(1)          |
| O(2)  | 9182(1) | 1679(1)  | 8198(1)  | 19(1)          |
| O(3)  | 5014(1) | -639(1)  | 8774(1)  | 31(1)          |
| O(4)  | 5252(1) | 1153(1)  | 8199(1)  | 24(1)          |
| N(1)  | 7366(1) | 1689(1)  | 8968(1)  | 14(1)          |
| C(1)  | 8795(2) | -247(2)  | 6995(1)  | 21(1)          |
| C(2)  | 8645(2) | -743(2)  | 7798(1)  | 19(1)          |
| C(3)  | 8216(2) | 1187(2)  | 8444(1)  | 14(1)          |
| C(4)  | 6424(2) | 886(2)   | 9360(1)  | 15(1)          |
| C(5)  | 7126(2) | -79(2)   | 9841(1)  | 15(1)          |
| C(6)  | 6458(2) | -1064(2) | 10141(1) | 20(1)          |
| C(7)  | 7082(2) | -1904(2) | 10603(1) | 26(1)          |
| C(8)  | 8383(2) | -1769(2) | 10784(1) | 27(1)          |
| C(9)  | 7838(2) | -1890(2) | 7789(1)  | 35(1)          |
| C(10) | 9927(2) | -945(2)  | 8202(1)  | 34(1)          |
| C(11) | 5569(2) | 1642(2)  | 9911(1)  | 18(1)          |
| C(12) | 6418(2) | 2459(2)  | 10403(1) | 19(1)          |
| C(13) | 7059(2) | 3349(2)  | 9870(1)  | 17(1)          |
| C(14) | 7436(2) | 2946(2)  | 9140(1)  | 15(1)          |
| C(15) | 7847(2) | 3779(2)  | 8592(1)  | 18(1)          |
| C(16) | 7977(2) | 4986(2)  | 8785(1)  | 21(1)          |
| C(17) | 7680(2) | 5382(2)  | 9518(1)  | 24(1)          |
| C(18) | 7201(2) | 4566(2)  | 10050(1) | 21(1)          |
| C(19) | 5504(2) | 342(2)   | 8752(1)  | 20(1)          |
| C(20) | 4412(2) | 716(2)   | 7595(1)  | 35(1)          |
| C(21) | 9046(2) | -776(2)  | 10509(1) | 25(1)          |
| C(22) | 8422(2) | 63(2)    | 10044(1) | 19(1)          |



Table S-3. Bond lengths [ $\text{\AA}$ ] and angles [ $^\circ$ ] for **3a**.

---

|             |          |
|-------------|----------|
| O(1)-C(3)   | 1.339(2) |
| O(1)-C(2)   | 1.482(2) |
| O(2)-C(3)   | 1.215(2) |
| O(3)-C(19)  | 1.199(2) |
| O(4)-C(19)  | 1.343(2) |
| O(4)-C(20)  | 1.446(2) |
| N(1)-C(3)   | 1.382(2) |
| N(1)-C(14)  | 1.428(2) |
| N(1)-C(4)   | 1.484(2) |
| C(1)-C(2)   | 1.511(2) |
| C(1)-H(24)  | 0.9800   |
| C(1)-H(1)   | 0.9800   |
| C(1)-H(25)  | 0.9800   |
| C(2)-C(10)  | 1.514(3) |
| C(2)-C(9)   | 1.520(3) |
| C(4)-C(5)   | 1.540(2) |
| C(4)-C(19)  | 1.546(2) |
| C(4)-C(11)  | 1.548(2) |
| C(5)-C(22)  | 1.392(3) |
| C(5)-C(6)   | 1.393(3) |
| C(6)-C(7)   | 1.388(3) |
| C(6)-H(20)  | 0.9500   |
| C(7)-C(8)   | 1.388(3) |
| C(7)-H(21)  | 0.9500   |
| C(8)-C(21)  | 1.381(3) |
| C(8)-H(2)   | 0.9500   |
| C(9)-H(3)   | 0.9800   |
| C(9)-H(5)   | 0.9800   |
| C(9)-H(4)   | 0.9800   |
| C(10)-H(8)  | 0.9800   |
| C(10)-H(6)  | 0.9800   |
| C(10)-H(7)  | 0.9800   |
| C(11)-C(12) | 1.524(3) |
| C(11)-H(16) | 0.9900   |
| C(11)-H(9)  | 0.9900   |
| C(12)-C(13) | 1.506(2) |

|             |          |
|-------------|----------|
| C(12)-H(14) | 0.9900   |
| C(12)-H(15) | 0.9900   |
| C(13)-C(18) | 1.393(3) |
| C(13)-C(14) | 1.402(2) |
| C(14)-C(15) | 1.394(2) |
| C(15)-C(16) | 1.387(3) |
| C(15)-H(13) | 0.9500   |
| C(16)-C(17) | 1.385(3) |
| C(16)-H(10) | 0.9500   |
| C(17)-C(18) | 1.385(3) |
| C(17)-H(12) | 0.9500   |
| C(18)-H(11) | 0.9500   |
| C(20)-H(17) | 0.9800   |
| C(20)-H(19) | 0.9800   |
| C(20)-H(18) | 0.9800   |
| C(21)-C(22) | 1.391(3) |
| C(21)-H(22) | 0.9500   |
| C(22)-H(23) | 0.9500   |

|                  |            |
|------------------|------------|
| C(3)-O(1)-C(2)   | 121.10(13) |
| C(19)-O(4)-C(20) | 114.36(16) |
| C(3)-N(1)-C(14)  | 120.00(14) |
| C(3)-N(1)-C(4)   | 118.52(14) |
| C(14)-N(1)-C(4)  | 121.44(14) |
| C(2)-C(1)-H(24)  | 109.5      |
| C(2)-C(1)-H(1)   | 109.5      |
| H(24)-C(1)-H(1)  | 109.5      |
| C(2)-C(1)-H(25)  | 109.5      |
| H(24)-C(1)-H(25) | 109.5      |
| H(1)-C(1)-H(25)  | 109.5      |
| O(1)-C(2)-C(1)   | 109.96(14) |
| O(1)-C(2)-C(10)  | 109.87(14) |
| C(1)-C(2)-C(10)  | 113.17(17) |
| O(1)-C(2)-C(9)   | 101.61(15) |
| C(1)-C(2)-C(9)   | 110.52(16) |
| C(10)-C(2)-C(9)  | 111.10(18) |
| O(2)-C(3)-O(1)   | 125.56(16) |
| O(2)-C(3)-N(1)   | 124.92(16) |

|                   |            |
|-------------------|------------|
| O(1)-C(3)-N(1)    | 109.51(14) |
| N(1)-C(4)-C(5)    | 111.07(14) |
| N(1)-C(4)-C(19)   | 108.73(14) |
| C(5)-C(4)-C(19)   | 112.94(14) |
| N(1)-C(4)-C(11)   | 109.51(14) |
| C(5)-C(4)-C(11)   | 107.90(13) |
| C(19)-C(4)-C(11)  | 106.55(14) |
| C(22)-C(5)-C(6)   | 118.02(17) |
| C(22)-C(5)-C(4)   | 120.69(16) |
| C(6)-C(5)-C(4)    | 121.07(16) |
| C(7)-C(6)-C(5)    | 120.87(18) |
| C(7)-C(6)-H(20)   | 119.6      |
| C(5)-C(6)-H(20)   | 119.6      |
| C(8)-C(7)-C(6)    | 120.54(19) |
| C(8)-C(7)-H(21)   | 119.7      |
| C(6)-C(7)-H(21)   | 119.7      |
| C(21)-C(8)-C(7)   | 119.07(19) |
| C(21)-C(8)-H(2)   | 120.5      |
| C(7)-C(8)-H(2)    | 120.5      |
| C(2)-C(9)-H(3)    | 109.5      |
| C(2)-C(9)-H(5)    | 109.5      |
| H(3)-C(9)-H(5)    | 109.5      |
| C(2)-C(9)-H(4)    | 109.5      |
| H(3)-C(9)-H(4)    | 109.5      |
| H(5)-C(9)-H(4)    | 109.5      |
| C(2)-C(10)-H(8)   | 109.5      |
| C(2)-C(10)-H(6)   | 109.5      |
| H(8)-C(10)-H(6)   | 109.5      |
| C(2)-C(10)-H(7)   | 109.5      |
| H(8)-C(10)-H(7)   | 109.5      |
| H(6)-C(10)-H(7)   | 109.5      |
| C(12)-C(11)-C(4)  | 109.97(14) |
| C(12)-C(11)-H(16) | 109.7      |
| C(4)-C(11)-H(16)  | 109.7      |
| C(12)-C(11)-H(9)  | 109.7      |
| C(4)-C(11)-H(9)   | 109.7      |
| H(16)-C(11)-H(9)  | 108.2      |
| C(13)-C(12)-C(11) | 107.22(15) |

|                   |            |
|-------------------|------------|
| C(13)-C(12)-H(14) | 110.3      |
| C(11)-C(12)-H(14) | 110.3      |
| C(13)-C(12)-H(15) | 110.3      |
| C(11)-C(12)-H(15) | 110.3      |
| H(14)-C(12)-H(15) | 108.5      |
| C(18)-C(13)-C(14) | 118.86(16) |
| C(18)-C(13)-C(12) | 122.85(16) |
| C(14)-C(13)-C(12) | 118.11(16) |
| C(15)-C(14)-C(13) | 119.64(16) |
| C(15)-C(14)-N(1)  | 121.18(15) |
| C(13)-C(14)-N(1)  | 119.17(15) |
| C(16)-C(15)-C(14) | 120.18(17) |
| C(16)-C(15)-H(13) | 119.9      |
| C(14)-C(15)-H(13) | 119.9      |
| C(15)-C(16)-C(17) | 120.53(18) |
| C(15)-C(16)-H(10) | 119.7      |
| C(17)-C(16)-H(10) | 119.7      |
| C(18)-C(17)-C(16) | 119.19(17) |
| C(18)-C(17)-H(12) | 120.4      |
| C(16)-C(17)-H(12) | 120.4      |
| C(17)-C(18)-C(13) | 121.37(17) |
| C(17)-C(18)-H(11) | 119.3      |
| C(13)-C(18)-H(11) | 119.3      |
| O(3)-C(19)-O(4)   | 123.27(17) |
| O(3)-C(19)-C(4)   | 126.24(17) |
| O(4)-C(19)-C(4)   | 110.39(15) |
| O(4)-C(20)-H(17)  | 109.5      |
| O(4)-C(20)-H(19)  | 109.5      |
| H(17)-C(20)-H(19) | 109.5      |
| O(4)-C(20)-H(18)  | 109.5      |
| H(17)-C(20)-H(18) | 109.5      |
| H(19)-C(20)-H(18) | 109.5      |
| C(8)-C(21)-C(22)  | 120.41(19) |
| C(8)-C(21)-H(22)  | 119.8      |
| C(22)-C(21)-H(22) | 119.8      |
| C(5)-C(22)-C(21)  | 121.04(18) |
| C(5)-C(22)-H(23)  | 119.5      |
| C(21)-C(22)-H(23) | 119.5      |

Table S-4. Anisotropic displacement parameters ( $\approx 2 \times 10^3$ ) for **3a**. The anisotropic displacement factor exponent takes the form:  $-2\pi^2 [ h^2 a^{*2} U^{11} + \dots + 2 h k a^* b^* U^{12} ]$

|       | U <sup>11</sup> | U <sup>22</sup> | U <sup>33</sup> | U <sup>23</sup> | U <sup>13</sup> | U <sup>12</sup> |
|-------|-----------------|-----------------|-----------------|-----------------|-----------------|-----------------|
| O(1)  | 19(1)           | 13(1)           | 17(1)           | -2(1)           | 4(1)            | 1(1)            |
| O(2)  | 17(1)           | 21(1)           | 18(1)           | -2(1)           | 4(1)            | -3(1)           |
| O(3)  | 34(1)           | 30(1)           | 30(1)           | 1(1)            | -6(1)           | -16(1)          |
| O(4)  | 23(1)           | 27(1)           | 24(1)           | -1(1)           | -8(1)           | 3(1)            |
| N(1)  | 15(1)           | 12(1)           | 15(1)           | 1(1)            | 3(1)            | 0(1)            |
| C(1)  | 24(1)           | 24(1)           | 17(1)           | -3(1)           | 0(1)            | 2(1)            |
| C(2)  | 25(1)           | 17(1)           | 17(1)           | -3(1)           | 4(1)            | 6(1)            |
| C(3)  | 16(1)           | 14(1)           | 12(1)           | 1(1)            | -1(1)           | 2(1)            |
| C(4)  | 14(1)           | 15(1)           | 17(1)           | 1(1)            | 3(1)            | -3(1)           |
| C(5)  | 19(1)           | 15(1)           | 12(1)           | -2(1)           | 4(1)            | 2(1)            |
| C(6)  | 24(1)           | 17(1)           | 20(1)           | -2(1)           | 4(1)            | -1(1)           |
| C(7)  | 39(1)           | 17(1)           | 21(1)           | 2(1)            | 8(1)            | 0(1)            |
| C(8)  | 36(1)           | 24(1)           | 21(1)           | 5(1)            | 3(1)            | 13(1)           |
| C(9)  | 52(1)           | 17(1)           | 35(1)           | -4(1)           | 15(1)           | -1(1)           |
| C(10) | 39(1)           | 42(1)           | 20(1)           | -4(1)           | -3(1)           | 24(1)           |
| C(11) | 16(1)           | 18(1)           | 19(1)           | 1(1)            | 5(1)            | 2(1)            |
| C(12) | 21(1)           | 19(1)           | 17(1)           | -1(1)           | 4(1)            | 4(1)            |
| C(13) | 14(1)           | 18(1)           | 18(1)           | 0(1)            | 0(1)            | 2(1)            |
| C(14) | 11(1)           | 14(1)           | 19(1)           | -1(1)           | -1(1)           | 0(1)            |
| C(15) | 16(1)           | 18(1)           | 19(1)           | 1(1)            | 1(1)            | 1(1)            |
| C(16) | 19(1)           | 16(1)           | 29(1)           | 5(1)            | 1(1)            | 1(1)            |
| C(17) | 20(1)           | 14(1)           | 37(1)           | -5(1)           | -1(1)           | 1(1)            |
| C(18) | 18(1)           | 20(1)           | 24(1)           | -6(1)           | -1(1)           | 4(1)            |
| C(19) | 16(1)           | 24(1)           | 20(1)           | -1(1)           | 2(1)            | 0(1)            |
| C(20) | 31(1)           | 44(1)           | 29(1)           | -5(1)           | -14(1)          | 4(1)            |
| C(21) | 22(1)           | 34(1)           | 20(1)           | 2(1)            | 2(1)            | 9(1)            |
| C(22) | 21(1)           | 21(1)           | 16(1)           | 2(1)            | 3(1)            | 0(1)            |

Table S-5. Hydrogen coordinates ( $\times 10^4$ ) and isotropic displacement parameters ( $\approx^2 \times 10^{-3}$ ) for **3a**.

|       | x     | y     | z     | U(eq) |
|-------|-------|-------|-------|-------|
| H(24) | 7937  | -125  | 6766  | 32    |
| H(1)  | 9289  | -820  | 6681  | 32    |
| H(25) | 9257  | 524   | 7015  | 32    |
| H(20) | 5563  | -1162 | 10028 | 24    |
| H(21) | 6614  | -2578 | 10795 | 31    |
| H(2)  | 8813  | -2350 | 11094 | 32    |
| H(3)  | 7703  | -2171 | 8317  | 52    |
| H(5)  | 8292  | -2514 | 7495  | 52    |
| H(4)  | 6997  | -1724 | 7550  | 52    |
| H(8)  | 10461 | -217  | 8158  | 50    |
| H(6)  | 10380 | -1625 | 7962  | 50    |
| H(7)  | 9771  | -1124 | 8745  | 50    |
| H(16) | 4955  | 2137  | 9609  | 21    |
| H(9)  | 5061  | 1097  | 10246 | 21    |
| H(14) | 5884  | 2888  | 10788 | 23    |
| H(15) | 7081  | 1977  | 10677 | 23    |
| H(13) | 8038  | 3518  | 8084  | 21    |
| H(10) | 8273  | 5546  | 8411  | 26    |
| H(12) | 7802  | 6204  | 9656  | 28    |
| H(11) | 6965  | 4842  | 10547 | 25    |
| H(17) | 4791  | -9    | 7364  | 52    |
| H(19) | 4315  | 1340  | 7201  | 52    |
| H(18) | 3560  | 520   | 7811  | 52    |
| H(22) | 9932  | -665  | 10639 | 30    |
| H(23) | 8889  | 744   | 9861  | 23    |

Table S-6. Hydrogen bonds for **3a** [ $\approx$  and  $\infty$ ].

| D-H...A           | d(D-H) | d(H...A) | d(D...A) | $\angle$ (DHA) |
|-------------------|--------|----------|----------|----------------|
| C(1)-H(25)...O(2) | 0.98   | 2.42     | 3.018(2) | 118.5          |
| C(10)-H(8)...O(2) | 0.98   | 2.48     | 3.009(3) | 113.4          |

4. X-ray data for compound (*R*)-3g

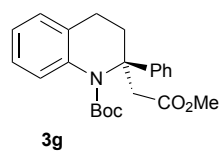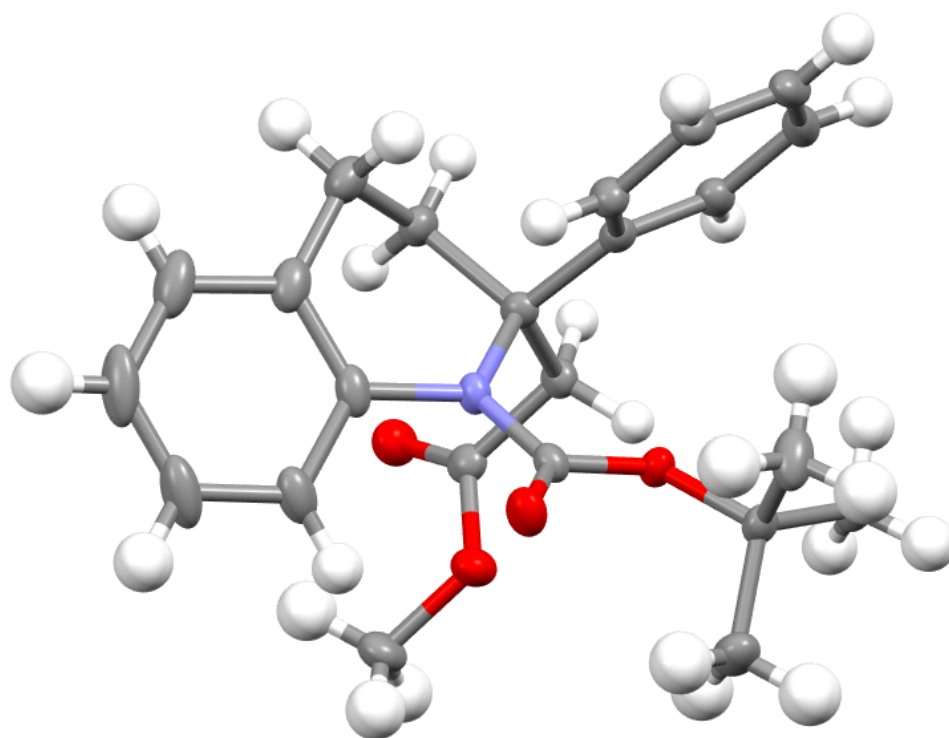



Table S-7. Crystal data and structure refinement for (*R*)-**3g**.

|                                         |                                                                       |                             |
|-----------------------------------------|-----------------------------------------------------------------------|-----------------------------|
| Identification code                     | CARTERN2_0m                                                           |                             |
| Empirical formula                       | C <sub>23</sub> H <sub>27</sub> N O <sub>4</sub>                      |                             |
| Formula weight                          | 381.45                                                                |                             |
| Temperature                             | 97(2) K                                                               |                             |
| Wavelength                              | 1.54178 $\approx$                                                     |                             |
| Crystal system                          | Monoclinic                                                            |                             |
| Space group                             | P2 <sub>1</sub>                                                       |                             |
| Unit cell dimensions                    | a = 9.4950(3) $\approx$                                               | $\alpha = 90^\circ$ .       |
|                                         | b = 8.8357(3) $\approx$                                               | $\beta = 90.258(2)^\circ$ . |
|                                         | c = 12.0617(4) $\approx$                                              | $\gamma = 90^\circ$ .       |
| Volume                                  | 1011.91(6) $\approx^3$                                                |                             |
| Z                                       | 2                                                                     |                             |
| Density (calculated)                    | 1.252 Mg/m <sup>3</sup>                                               |                             |
| Absorption coefficient                  | 0.687 mm <sup>-1</sup>                                                |                             |
| F(000)                                  | 408                                                                   |                             |
| Crystal size                            | 0.320 x 0.120 x 0.090 mm <sup>3</sup>                                 |                             |
| Theta range for data collection         | 3.664 to 66.614 $^\circ$ .                                            |                             |
| Index ranges                            | -11 $\leq$ h $\leq$ 11, -10 $\leq$ k $\leq$ 9, -14 $\leq$ l $\leq$ 14 |                             |
| Reflections collected                   | 14554                                                                 |                             |
| Independent reflections                 | 3491 [R(int) = 0.0511]                                                |                             |
| Completeness to theta = 66.614 $^\circ$ | 99.7 %                                                                |                             |
| Absorption correction                   | Semi-empirical from equivalents                                       |                             |
| Max. and min. transmission              | 0.91 and 0.87                                                         |                             |
| Refinement method                       | Full-matrix least-squares on F <sup>2</sup>                           |                             |
| Data / restraints / parameters          | 3491 / 1 / 258                                                        |                             |
| Goodness-of-fit on F <sup>2</sup>       | 1.016                                                                 |                             |
| Final R indices [I > 2 $\sigma$ (I)]    | R1 = 0.0337, wR2 = 0.0753                                             |                             |
| R indices (all data)                    | R1 = 0.0418, wR2 = 0.0786                                             |                             |
| Absolute structure parameter            | 0.11(12)                                                              |                             |
| Extinction coefficient                  | 0.0107(11)                                                            |                             |
| Largest diff. peak and hole             | 0.161 and -0.141 e. $\approx^3$                                       |                             |

CCDC 1578267

Table S-8. Atomic coordinates ( $\times 10^4$ ) and equivalent isotropic displacement parameters ( $\approx^2 \times 10^3$ ) for (R)-**3g**. U(eq) is defined as one third of the trace of the orthogonalized  $U^{ij}$  tensor.

|       | x       | y       | z       | U(eq) |
|-------|---------|---------|---------|-------|
| O(1)  | 4203(2) | 4513(2) | 7710(1) | 21(1) |
| O(2)  | 1078(2) | 4009(2) | 6578(2) | 27(1) |
| O(3)  | 3201(2) | 5368(2) | 9292(1) | 26(1) |
| O(4)  | 423(2)  | 5412(2) | 5114(1) | 30(1) |
| N(1)  | 2693(2) | 6449(2) | 7602(2) | 20(1) |
| C(1)  | 4335(3) | 2281(4) | 8933(2) | 36(1) |
| C(2)  | 5165(2) | 3421(3) | 8261(2) | 22(1) |
| C(3)  | 3357(2) | 5426(3) | 8297(2) | 19(1) |
| C(4)  | 3232(2) | 6734(3) | 6460(2) | 19(1) |
| C(5)  | 4808(3) | 7055(3) | 6515(2) | 21(1) |
| C(6)  | 5355(3) | 7883(3) | 7403(2) | 25(1) |
| C(7)  | 6766(3) | 8258(3) | 7463(2) | 30(1) |
| C(8)  | 7678(3) | 7794(3) | 6643(2) | 31(1) |
| C(9)  | -388(3) | 3625(3) | 6758(2) | 33(1) |
| C(10) | 1327(3) | 4959(3) | 5733(2) | 22(1) |
| C(11) | 2860(2) | 5392(3) | 5678(2) | 21(1) |
| C(12) | 6250(3) | 4257(4) | 8944(3) | 37(1) |
| C(13) | 5849(3) | 2663(3) | 7268(2) | 28(1) |
| C(14) | 1612(3) | 7385(3) | 8058(2) | 24(1) |
| C(15) | 1516(3) | 8897(3) | 7749(2) | 28(1) |
| C(16) | 2397(3) | 9454(3) | 6808(2) | 32(1) |
| C(17) | 2502(3) | 8164(3) | 5982(2) | 25(1) |
| C(18) | 494(3)  | 9802(4) | 8252(3) | 38(1) |
| C(19) | -418(3) | 9218(4) | 9031(2) | 45(1) |
| C(20) | -364(3) | 7693(4) | 9284(2) | 41(1) |
| C(21) | 634(3)  | 6764(4) | 8788(2) | 30(1) |
| C(22) | 7164(3) | 6955(3) | 5757(2) | 29(1) |
| C(23) | 5739(3) | 6603(3) | 5690(2) | 24(1) |

Table S-9. Bond lengths [ $\approx$ ] and angles [ $\infty$ ] for (*R*)-**3g**.

---

|             |          |
|-------------|----------|
| O(1)-C(3)   | 1.343(3) |
| O(1)-C(2)   | 1.483(3) |
| O(2)-C(10)  | 1.342(3) |
| O(2)-C(9)   | 1.450(3) |
| O(3)-C(3)   | 1.211(3) |
| O(4)-C(10)  | 1.204(3) |
| N(1)-C(3)   | 1.382(3) |
| N(1)-C(14)  | 1.430(3) |
| N(1)-C(4)   | 1.493(3) |
| C(1)-C(2)   | 1.517(4) |
| C(1)-H(10)  | 0.9800   |
| C(1)-H(1)   | 0.9800   |
| C(1)-H(9)   | 0.9800   |
| C(2)-C(12)  | 1.510(4) |
| C(2)-C(13)  | 1.520(3) |
| C(4)-C(5)   | 1.524(3) |
| C(4)-C(17)  | 1.551(3) |
| C(4)-C(11)  | 1.555(3) |
| C(5)-C(23)  | 1.393(4) |
| C(5)-C(6)   | 1.396(4) |
| C(6)-C(7)   | 1.382(4) |
| C(6)-H(25)  | 0.9500   |
| C(7)-C(8)   | 1.380(4) |
| C(7)-H(22)  | 0.9500   |
| C(8)-C(22)  | 1.387(4) |
| C(8)-H(2)   | 0.9500   |
| C(9)-H(3)   | 0.9800   |
| C(9)-H(4)   | 0.9800   |
| C(9)-H(5)   | 0.9800   |
| C(10)-C(11) | 1.507(3) |
| C(11)-H(27) | 0.9900   |
| C(11)-H(26) | 0.9900   |
| C(12)-H(6)  | 0.9800   |
| C(12)-H(8)  | 0.9800   |
| C(12)-H(7)  | 0.9800   |
| C(13)-H(12) | 0.9800   |

|             |          |
|-------------|----------|
| C(13)-H(11) | 0.9800   |
| C(13)-H(13) | 0.9800   |
| C(14)-C(15) | 1.390(4) |
| C(14)-C(21) | 1.395(4) |
| C(15)-C(18) | 1.398(4) |
| C(15)-C(16) | 1.496(4) |
| C(16)-C(17) | 1.518(4) |
| C(16)-H(17) | 0.9900   |
| C(16)-H(16) | 0.9900   |
| C(17)-H(15) | 0.9900   |
| C(17)-H(14) | 0.9900   |
| C(18)-C(19) | 1.380(5) |
| C(18)-H(18) | 0.9500   |
| C(19)-C(20) | 1.383(5) |
| C(19)-H(21) | 0.9500   |
| C(20)-C(21) | 1.390(4) |
| C(20)-H(20) | 0.9500   |
| C(21)-H(19) | 0.9500   |
| C(22)-C(23) | 1.390(4) |
| C(22)-H(24) | 0.9500   |
| C(23)-H(23) | 0.9500   |

|                  |            |
|------------------|------------|
| C(3)-O(1)-C(2)   | 121.59(18) |
| C(10)-O(2)-C(9)  | 115.6(2)   |
| C(3)-N(1)-C(14)  | 118.09(19) |
| C(3)-N(1)-C(4)   | 120.85(18) |
| C(14)-N(1)-C(4)  | 120.4(2)   |
| C(2)-C(1)-H(10)  | 109.5      |
| C(2)-C(1)-H(1)   | 109.5      |
| H(10)-C(1)-H(1)  | 109.5      |
| C(2)-C(1)-H(9)   | 109.5      |
| H(10)-C(1)-H(9)  | 109.5      |
| H(1)-C(1)-H(9)   | 109.5      |
| O(1)-C(2)-C(12)  | 110.1(2)   |
| O(1)-C(2)-C(1)   | 110.5(2)   |
| C(12)-C(2)-C(1)  | 112.8(2)   |
| O(1)-C(2)-C(13)  | 101.47(19) |
| C(12)-C(2)-C(13) | 110.7(2)   |

|                   |            |
|-------------------|------------|
| C(1)-C(2)-C(13)   | 110.7(2)   |
| O(3)-C(3)-O(1)    | 125.0(2)   |
| O(3)-C(3)-N(1)    | 124.8(2)   |
| O(1)-C(3)-N(1)    | 110.2(2)   |
| N(1)-C(4)-C(5)    | 109.38(19) |
| N(1)-C(4)-C(17)   | 109.06(19) |
| C(5)-C(4)-C(17)   | 107.5(2)   |
| N(1)-C(4)-C(11)   | 110.68(19) |
| C(5)-C(4)-C(11)   | 112.9(2)   |
| C(17)-C(4)-C(11)  | 107.2(2)   |
| C(23)-C(5)-C(6)   | 117.6(2)   |
| C(23)-C(5)-C(4)   | 122.8(2)   |
| C(6)-C(5)-C(4)    | 119.5(2)   |
| C(7)-C(6)-C(5)    | 121.5(2)   |
| C(7)-C(6)-H(25)   | 119.2      |
| C(5)-C(6)-H(25)   | 119.2      |
| C(8)-C(7)-C(6)    | 120.2(3)   |
| C(8)-C(7)-H(22)   | 119.9      |
| C(6)-C(7)-H(22)   | 119.9      |
| C(7)-C(8)-C(22)   | 119.4(2)   |
| C(7)-C(8)-H(2)    | 120.3      |
| C(22)-C(8)-H(2)   | 120.3      |
| O(2)-C(9)-H(3)    | 109.5      |
| O(2)-C(9)-H(4)    | 109.5      |
| H(3)-C(9)-H(4)    | 109.5      |
| O(2)-C(9)-H(5)    | 109.5      |
| H(3)-C(9)-H(5)    | 109.5      |
| H(4)-C(9)-H(5)    | 109.5      |
| O(4)-C(10)-O(2)   | 123.5(2)   |
| O(4)-C(10)-C(11)  | 125.1(2)   |
| O(2)-C(10)-C(11)  | 111.4(2)   |
| C(10)-C(11)-C(4)  | 112.54(19) |
| C(10)-C(11)-H(27) | 109.1      |
| C(4)-C(11)-H(27)  | 109.1      |
| C(10)-C(11)-H(26) | 109.1      |
| C(4)-C(11)-H(26)  | 109.1      |
| H(27)-C(11)-H(26) | 107.8      |
| C(2)-C(12)-H(6)   | 109.5      |

|                   |          |
|-------------------|----------|
| C(2)-C(12)-H(8)   | 109.5    |
| H(6)-C(12)-H(8)   | 109.5    |
| C(2)-C(12)-H(7)   | 109.5    |
| H(6)-C(12)-H(7)   | 109.5    |
| H(8)-C(12)-H(7)   | 109.5    |
| C(2)-C(13)-H(12)  | 109.5    |
| C(2)-C(13)-H(11)  | 109.5    |
| H(12)-C(13)-H(11) | 109.5    |
| C(2)-C(13)-H(13)  | 109.5    |
| H(12)-C(13)-H(13) | 109.5    |
| H(11)-C(13)-H(13) | 109.5    |
| C(15)-C(14)-C(21) | 120.3(2) |
| C(15)-C(14)-N(1)  | 119.9(2) |
| C(21)-C(14)-N(1)  | 119.8(3) |
| C(14)-C(15)-C(18) | 118.6(3) |
| C(14)-C(15)-C(16) | 118.9(2) |
| C(18)-C(15)-C(16) | 122.2(3) |
| C(15)-C(16)-C(17) | 106.8(2) |
| C(15)-C(16)-H(17) | 110.4    |
| C(17)-C(16)-H(17) | 110.4    |
| C(15)-C(16)-H(16) | 110.4    |
| C(17)-C(16)-H(16) | 110.4    |
| H(17)-C(16)-H(16) | 108.6    |
| C(16)-C(17)-C(4)  | 113.4(2) |
| C(16)-C(17)-H(15) | 108.9    |
| C(4)-C(17)-H(15)  | 108.9    |
| C(16)-C(17)-H(14) | 108.9    |
| C(4)-C(17)-H(14)  | 108.9    |
| H(15)-C(17)-H(14) | 107.7    |
| C(19)-C(18)-C(15) | 121.3(3) |
| C(19)-C(18)-H(18) | 119.3    |
| C(15)-C(18)-H(18) | 119.3    |
| C(18)-C(19)-C(20) | 119.5(3) |
| C(18)-C(19)-H(21) | 120.3    |
| C(20)-C(19)-H(21) | 120.3    |
| C(19)-C(20)-C(21) | 120.3(3) |
| C(19)-C(20)-H(20) | 119.8    |
| C(21)-C(20)-H(20) | 119.8    |

|                   |          |
|-------------------|----------|
| C(20)-C(21)-C(14) | 119.7(3) |
| C(20)-C(21)-H(19) | 120.1    |
| C(14)-C(21)-H(19) | 120.1    |
| C(8)-C(22)-C(23)  | 120.3(3) |
| C(8)-C(22)-H(24)  | 119.9    |
| C(23)-C(22)-H(24) | 119.9    |
| C(22)-C(23)-C(5)  | 121.0(3) |
| C(22)-C(23)-H(23) | 119.5    |
| C(5)-C(23)-H(23)  | 119.5    |

---

Table S-10. Anisotropic displacement parameters ( $\approx 2 \times 10^3$ ) for (R)-**3g**. The anisotropic displacement factor exponent takes the form:  $-2\pi^2 [ h^2 a^{*2}U^{11} + \dots + 2 h k a^* b^* U^{12} ]$

|       | U <sup>11</sup> | U <sup>22</sup> | U <sup>33</sup> | U <sup>23</sup> | U <sup>13</sup> | U <sup>12</sup> |
|-------|-----------------|-----------------|-----------------|-----------------|-----------------|-----------------|
| O(1)  | 23(1)           | 20(1)           | 19(1)           | 2(1)            | 2(1)            | 5(1)            |
| O(2)  | 24(1)           | 27(1)           | 30(1)           | 5(1)            | -1(1)           | -4(1)           |
| O(3)  | 26(1)           | 36(1)           | 17(1)           | 1(1)            | 2(1)            | 5(1)            |
| O(4)  | 24(1)           | 34(1)           | 30(1)           | 5(1)            | -4(1)           | 0(1)            |
| N(1)  | 18(1)           | 23(1)           | 18(1)           | -1(1)           | 1(1)            | 4(1)            |
| C(1)  | 42(2)           | 29(2)           | 37(2)           | 11(1)           | 10(1)           | 5(1)            |
| C(2)  | 22(1)           | 21(2)           | 22(1)           | 5(1)            | -1(1)           | 5(1)            |
| C(3)  | 16(1)           | 23(1)           | 19(1)           | -3(1)           | 1(1)            | -1(1)           |
| C(4)  | 22(1)           | 20(1)           | 15(1)           | 1(1)            | 2(1)            | 0(1)            |
| C(5)  | 21(1)           | 18(1)           | 24(1)           | 4(1)            | 0(1)            | 2(1)            |
| C(6)  | 24(1)           | 22(2)           | 29(2)           | -1(1)           | 2(1)            | 0(1)            |
| C(7)  | 25(1)           | 23(2)           | 40(2)           | 1(1)            | -4(1)           | -4(1)           |
| C(8)  | 19(1)           | 27(2)           | 46(2)           | 12(1)           | 1(1)            | -1(1)           |
| C(9)  | 25(1)           | 34(2)           | 40(2)           | 6(1)            | 3(1)            | -7(1)           |
| C(10) | 25(1)           | 20(2)           | 20(1)           | -2(1)           | 2(1)            | 1(1)            |
| C(11) | 22(1)           | 21(1)           | 19(1)           | -2(1)           | 2(1)            | 2(1)            |
| C(12) | 30(2)           | 39(2)           | 42(2)           | -15(1)          | -10(1)          | 10(1)           |
| C(13) | 30(2)           | 25(2)           | 28(2)           | 1(1)            | 3(1)            | 7(1)            |
| C(14) | 18(1)           | 36(2)           | 18(1)           | -7(1)           | -3(1)           | 5(1)            |
| C(15) | 26(1)           | 30(2)           | 30(2)           | -9(1)           | -9(1)           | 6(1)            |
| C(16) | 31(2)           | 24(2)           | 40(2)           | 1(1)            | -6(1)           | 5(1)            |
| C(17) | 24(1)           | 22(2)           | 27(2)           | 3(1)            | 0(1)            | 3(1)            |
| C(18) | 36(2)           | 40(2)           | 37(2)           | -17(1)          | -13(1)          | 16(1)           |
| C(19) | 34(2)           | 72(3)           | 29(2)           | -24(2)          | -7(1)           | 25(2)           |
| C(20) | 26(2)           | 75(3)           | 21(2)           | -9(2)           | 0(1)            | 15(2)           |
| C(21) | 21(1)           | 49(2)           | 19(1)           | 0(1)            | -2(1)           | 7(1)            |
| C(22) | 23(1)           | 31(2)           | 32(2)           | 11(1)           | 6(1)            | 6(1)            |
| C(23) | 23(1)           | 24(2)           | 24(1)           | 6(1)            | 3(1)            | 2(1)            |



Table S-11. Hydrogen coordinates (  $\times 10^4$ ) and isotropic displacement parameters ( $\approx \times 10^{-3}$ ) for (*R*)-**3g**.

|       | x     | y     | z    | U(eq) |
|-------|-------|-------|------|-------|
| H(10) | 3978  | 2767  | 9605 | 54    |
| H(1)  | 4948  | 1433  | 9138 | 54    |
| H(9)  | 3542  | 1904  | 8489 | 54    |
| H(25) | 4743  | 8196  | 7980 | 30    |
| H(22) | 7110  | 8837  | 8070 | 35    |
| H(2)  | 8649  | 8046  | 6684 | 37    |
| H(3)  | -975  | 4523  | 6635 | 49    |
| H(4)  | -510  | 3267  | 7520 | 49    |
| H(5)  | -671  | 2826  | 6239 | 49    |
| H(27) | 3094  | 5674  | 4906 | 25    |
| H(26) | 3442  | 4505  | 5883 | 25    |
| H(6)  | 6737  | 4995  | 8476 | 55    |
| H(8)  | 6934  | 3534  | 9246 | 55    |
| H(7)  | 5782  | 4785  | 9555 | 55    |
| H(12) | 5121  | 2183  | 6810 | 42    |
| H(11) | 6517  | 1894  | 7527 | 42    |
| H(13) | 6348  | 3424  | 6829 | 42    |
| H(17) | 3346  | 9745  | 7077 | 38    |
| H(16) | 1953  | 10348 | 6458 | 38    |
| H(15) | 3035  | 8516  | 5327 | 30    |
| H(14) | 1542  | 7889  | 5729 | 30    |
| H(18) | 425   | 10839 | 8053 | 45    |
| H(21) | -1077 | 9859  | 9390 | 54    |
| H(20) | -1012 | 7277  | 9798 | 49    |
| H(19) | 650   | 5711  | 8947 | 36    |
| H(24) | 7787  | 6620  | 5195 | 34    |
| H(23) | 5396  | 6045  | 5072 | 28    |

Table S-12. Hydrogen bonds for (*R*)-**3g** [ $\approx$  and  $\infty$ ].

| D-H...A            | d(D-H) | d(H...A) | d(D...A) | <(DHA) |
|--------------------|--------|----------|----------|--------|
| C(1)-H(10)...O(3)  | 0.98   | 2.44     | 2.965(4) | 113.0  |
| C(11)-H(26)...O(1) | 0.99   | 2.32     | 2.866(3) | 114.0  |
| C(12)-H(7)...O(3)  | 0.98   | 2.52     | 3.087(3) | 116.5  |
| C(17)-H(14)...O(4) | 0.99   | 2.54     | 3.300(3) | 133.2  |

5. X-ray data for compound ( $\pm$ )-**10a**

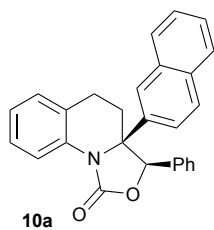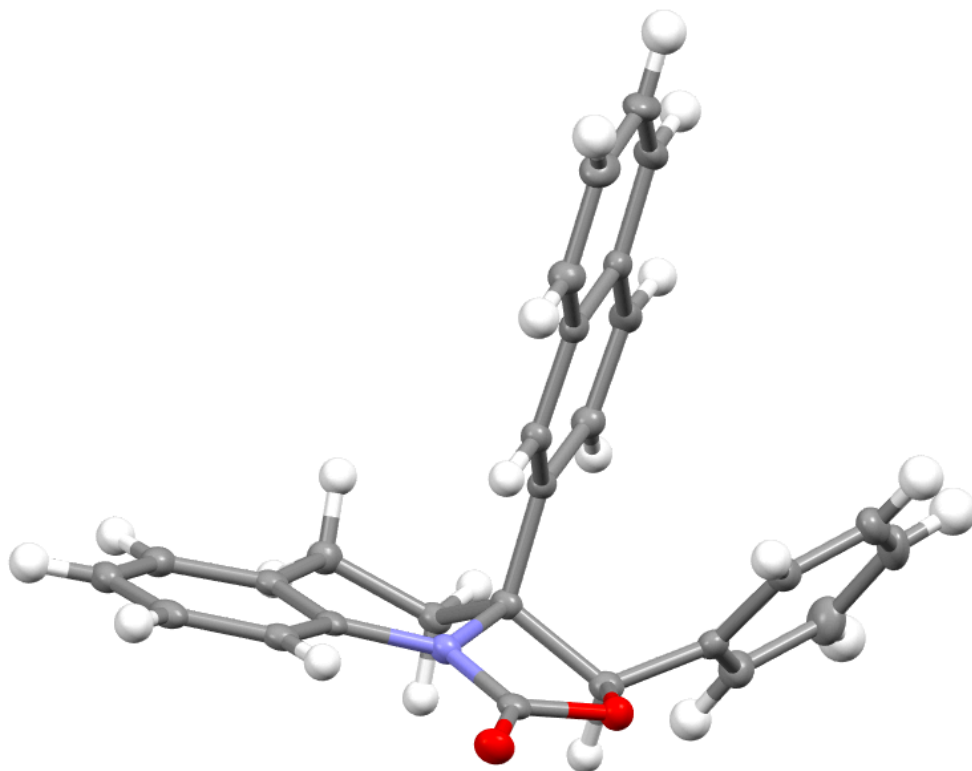

Table S-13. Crystal data and structure refinement for **10a**.

|                                           |                                                                      |            |
|-------------------------------------------|----------------------------------------------------------------------|------------|
| Identification code                       | OIC276v_0m                                                           |            |
| Empirical formula                         | C <sub>27</sub> H <sub>21</sub> N O <sub>2</sub>                     |            |
| Formula weight                            | 391.45                                                               |            |
| Temperature                               | 100(2) K                                                             |            |
| Wavelength                                | 1.54178 $\approx$                                                    |            |
| Crystal system                            | Triclinic                                                            |            |
| Space group                               | P-1                                                                  |            |
| Unit cell dimensions                      | a = 7.9717(3) $\approx$                                              | $\alpha =$ |
| 95.3798(16) $^\circ$ .                    | b = 9.2791(4) $\approx$                                              | $\beta =$  |
| 105.3362(17) $^\circ$ .                   | c = 14.2492(6) $\approx$                                             | $\gamma =$ |
| 98.2795(16) $^\circ$ .                    |                                                                      |            |
| Volume                                    | 996.24(7) $\approx^3$                                                |            |
| Z                                         | 2                                                                    |            |
| Density (calculated)                      | 1.305 Mg/m <sup>3</sup>                                              |            |
| Absorption coefficient                    | 0.647 mm <sup>-1</sup>                                               |            |
| F(000)                                    | 412                                                                  |            |
| Crystal size                              | 0.180 x 0.080 x 0.050 mm <sup>3</sup>                                |            |
| Theta range for data collection           | 3.247 to 66.736 $^\circ$ .                                           |            |
| Index ranges                              | -9 $\leq$ h $\leq$ 9, -11 $\leq$ k $\leq$ 11, -16 $\leq$ l $\leq$ 16 |            |
| Reflections collected                     | 29236                                                                |            |
| Independent reflections                   | 3496 [R(int) = 0.0356]                                               |            |
| Completeness to theta = 66.736 $^\circ$   | 99.1 %                                                               |            |
| Absorption correction                     | Semi-empirical from equivalents                                      |            |
| Max. and min. transmission                | 0.7528 and 0.6965                                                    |            |
| Refinement method                         | Full-matrix least-squares on F <sup>2</sup>                          |            |
| Data / restraints / parameters            | 3496 / 0 / 272                                                       |            |
| Goodness-of-fit on F <sup>2</sup>         | 1.038                                                                |            |
| Final R indices [I $\geq$ 2 $\sigma$ (I)] | R1 = 0.0321, wR2 = 0.0768                                            |            |
| R indices (all data)                      | R1 = 0.0387, wR2 = 0.0805                                            |            |
| Extinction coefficient                    | 0.0114(8)                                                            |            |
| Largest diff. peak and hole               | 0.250 and -0.186 e. $\approx^3$                                      |            |

CCDC 1578268

Table S-14. Atomic coordinates ( $\times 10^4$ ) and equivalent isotropic displacement parameters ( $\approx^2 \times 10^3$ ) for **10a**. U(eq) is defined as one third of the trace of the orthogonalized  $U^{ij}$  tensor.

|       | x        | y        | z       | U(eq) |
|-------|----------|----------|---------|-------|
| C(1)  | 2014(2)  | -617(1)  | 1187(1) | 16(1) |
| C(2)  | 3547(2)  | -786(1)  | 916(1)  | 18(1) |
| C(3)  | 3937(2)  | -2181(1) | 747(1)  | 20(1) |
| C(4)  | 2814(2)  | -3415(1) | 842(1)  | 21(1) |
| C(5)  | 1317(2)  | -3235(1) | 1128(1) | 20(1) |
| C(6)  | 896(2)   | -1849(1) | 1318(1) | 16(1) |
| C(7)  | -689(2)  | -1706(1) | 1691(1) | 19(1) |
| C(8)  | -1310(2) | -241(1)  | 1542(1) | 17(1) |
| C(9)  | 265(1)   | 1021(1)  | 1896(1) | 16(1) |
| C(10) | -199(2)  | 2493(1)  | 1542(1) | 16(1) |
| C(11) | 2247(2)  | 2082(1)  | 1094(1) | 16(1) |
| C(12) | 1153(2)  | 1199(1)  | 3001(1) | 15(1) |
| C(13) | 2953(2)  | 1413(1)  | 3384(1) | 16(1) |
| C(14) | 3773(2)  | 1642(1)  | 4413(1) | 18(1) |
| C(15) | 5629(2)  | 1839(1)  | 4814(1) | 21(1) |
| C(16) | 6367(2)  | 1997(1)  | 5809(1) | 25(1) |
| C(17) | 5294(2)  | 1972(1)  | 6453(1) | 26(1) |
| C(18) | 3503(2)  | 1801(1)  | 6088(1) | 23(1) |
| C(19) | 2693(2)  | 1637(1)  | 5062(1) | 19(1) |
| C(20) | 838(2)   | 1454(1)  | 4651(1) | 19(1) |
| C(21) | 90(2)    | 1230(1)  | 3660(1) | 18(1) |
| C(22) | -792(2)  | 3489(1)  | 2228(1) | 18(1) |
| C(23) | -2601(2) | 3402(1)  | 2088(1) | 23(1) |
| C(24) | -3230(2) | 4154(2)  | 2773(1) | 29(1) |
| C(25) | -2055(2) | 4999(1)  | 3601(1) | 29(1) |
| C(26) | -254(2)  | 5141(1)  | 3720(1) | 26(1) |
| C(27) | 387(2)   | 4400(1)  | 3039(1) | 21(1) |
| N(1)  | 1539(1)  | 788(1)   | 1339(1) | 15(1) |
| O(1)  | 1423(1)  | 3171(1)  | 1361(1) | 18(1) |
| O(2)  | 3420(1)  | 2315(1)  | 706(1)  | 21(1) |

Table S-15. Bond lengths [ $\approx$ ] and angles [ $\infty$ ] for **10a**.

---

|             |            |
|-------------|------------|
| C(1)-C(2)   | 1.4001(16) |
| C(1)-C(6)   | 1.4043(17) |
| C(1)-N(1)   | 1.4222(15) |
| C(2)-C(3)   | 1.3881(17) |
| C(2)-H(2)   | 0.9500     |
| C(3)-C(4)   | 1.3888(18) |
| C(3)-H(3)   | 0.9500     |
| C(4)-C(5)   | 1.3856(17) |
| C(4)-H(4)   | 0.9500     |
| C(5)-C(6)   | 1.3953(16) |
| C(5)-H(5)   | 0.9500     |
| C(6)-C(7)   | 1.5120(16) |
| C(7)-C(8)   | 1.5261(16) |
| C(7)-H(7A)  | 0.9900     |
| C(7)-H(7B)  | 0.9900     |
| C(8)-C(9)   | 1.5278(16) |
| C(8)-H(8A)  | 0.9900     |
| C(8)-H(8B)  | 0.9900     |
| C(9)-N(1)   | 1.4717(14) |
| C(9)-C(12)  | 1.5290(15) |
| C(9)-C(10)  | 1.5589(15) |
| C(10)-O(1)  | 1.4519(14) |
| C(10)-C(22) | 1.4941(16) |
| C(10)-H(10) | 1.0000     |
| C(11)-O(2)  | 1.2090(14) |
| C(11)-O(1)  | 1.3598(14) |
| C(11)-N(1)  | 1.3678(15) |
| C(12)-C(13) | 1.3711(16) |
| C(12)-C(21) | 1.4223(16) |
| C(13)-C(14) | 1.4202(16) |
| C(13)-H(13) | 0.9500     |
| C(14)-C(15) | 1.4156(17) |
| C(14)-C(19) | 1.4204(17) |
| C(15)-C(16) | 1.3678(17) |
| C(15)-H(15) | 0.9500     |
| C(16)-C(17) | 1.4096(19) |

|             |            |
|-------------|------------|
| C(16)-H(16) | 0.9500     |
| C(17)-C(18) | 1.3641(18) |
| C(17)-H(17) | 0.9500     |
| C(18)-C(19) | 1.4174(16) |
| C(18)-H(18) | 0.9500     |
| C(19)-C(20) | 1.4175(17) |
| C(20)-C(21) | 1.3620(16) |
| C(20)-H(20) | 0.9500     |
| C(21)-H(21) | 0.9500     |
| C(22)-C(23) | 1.3920(17) |
| C(22)-C(27) | 1.3951(17) |
| C(23)-C(24) | 1.3863(18) |
| C(23)-H(23) | 0.9500     |
| C(24)-C(25) | 1.3835(19) |
| C(24)-H(24) | 0.9500     |
| C(25)-C(26) | 1.3855(19) |
| C(25)-H(25) | 0.9500     |
| C(26)-C(27) | 1.3837(18) |
| C(26)-H(26) | 0.9500     |
| C(27)-H(27) | 0.9500     |

|                |            |
|----------------|------------|
| C(2)-C(1)-C(6) | 120.24(11) |
| C(2)-C(1)-N(1) | 121.76(10) |
| C(6)-C(1)-N(1) | 118.00(10) |
| C(3)-C(2)-C(1) | 119.95(11) |
| C(3)-C(2)-H(2) | 120.0      |
| C(1)-C(2)-H(2) | 120.0      |
| C(2)-C(3)-C(4) | 120.48(11) |
| C(2)-C(3)-H(3) | 119.8      |
| C(4)-C(3)-H(3) | 119.8      |
| C(5)-C(4)-C(3) | 119.19(11) |
| C(5)-C(4)-H(4) | 120.4      |
| C(3)-C(4)-H(4) | 120.4      |
| C(4)-C(5)-C(6) | 121.92(11) |
| C(4)-C(5)-H(5) | 119.0      |
| C(6)-C(5)-H(5) | 119.0      |
| C(5)-C(6)-C(1) | 118.17(10) |
| C(5)-C(6)-C(7) | 119.81(10) |

|                   |            |
|-------------------|------------|
| C(1)-C(6)-C(7)    | 121.99(10) |
| C(6)-C(7)-C(8)    | 112.53(9)  |
| C(6)-C(7)-H(7A)   | 109.1      |
| C(8)-C(7)-H(7A)   | 109.1      |
| C(6)-C(7)-H(7B)   | 109.1      |
| C(8)-C(7)-H(7B)   | 109.1      |
| H(7A)-C(7)-H(7B)  | 107.8      |
| C(7)-C(8)-C(9)    | 109.98(9)  |
| C(7)-C(8)-H(8A)   | 109.7      |
| C(9)-C(8)-H(8A)   | 109.7      |
| C(7)-C(8)-H(8B)   | 109.7      |
| C(9)-C(8)-H(8B)   | 109.7      |
| H(8A)-C(8)-H(8B)  | 108.2      |
| N(1)-C(9)-C(8)    | 108.54(9)  |
| N(1)-C(9)-C(12)   | 110.81(9)  |
| C(8)-C(9)-C(12)   | 113.42(9)  |
| N(1)-C(9)-C(10)   | 98.36(8)   |
| C(8)-C(9)-C(10)   | 112.32(9)  |
| C(12)-C(9)-C(10)  | 112.34(9)  |
| O(1)-C(10)-C(22)  | 111.99(9)  |
| O(1)-C(10)-C(9)   | 102.77(8)  |
| C(22)-C(10)-C(9)  | 116.48(9)  |
| O(1)-C(10)-H(10)  | 108.4      |
| C(22)-C(10)-H(10) | 108.4      |
| C(9)-C(10)-H(10)  | 108.4      |
| O(2)-C(11)-O(1)   | 121.86(10) |
| O(2)-C(11)-N(1)   | 128.90(11) |
| O(1)-C(11)-N(1)   | 109.24(9)  |
| C(13)-C(12)-C(21) | 118.62(10) |
| C(13)-C(12)-C(9)  | 122.12(10) |
| C(21)-C(12)-C(9)  | 119.16(10) |
| C(12)-C(13)-C(14) | 121.83(10) |
| C(12)-C(13)-H(13) | 119.1      |
| C(14)-C(13)-H(13) | 119.1      |
| C(15)-C(14)-C(13) | 122.25(11) |
| C(15)-C(14)-C(19) | 118.82(11) |
| C(13)-C(14)-C(19) | 118.91(11) |
| C(16)-C(15)-C(14) | 120.59(12) |



|                   |            |
|-------------------|------------|
| C(16)-C(15)-H(15) | 119.7      |
| C(14)-C(15)-H(15) | 119.7      |
| C(15)-C(16)-C(17) | 120.64(12) |
| C(15)-C(16)-H(16) | 119.7      |
| C(17)-C(16)-H(16) | 119.7      |
| C(18)-C(17)-C(16) | 120.08(11) |
| C(18)-C(17)-H(17) | 120.0      |
| C(16)-C(17)-H(17) | 120.0      |
| C(17)-C(18)-C(19) | 120.83(12) |
| C(17)-C(18)-H(18) | 119.6      |
| C(19)-C(18)-H(18) | 119.6      |
| C(18)-C(19)-C(20) | 122.68(11) |
| C(18)-C(19)-C(14) | 119.02(11) |
| C(20)-C(19)-C(14) | 118.29(11) |
| C(21)-C(20)-C(19) | 121.38(11) |
| C(21)-C(20)-H(20) | 119.3      |
| C(19)-C(20)-H(20) | 119.3      |
| C(20)-C(21)-C(12) | 120.92(11) |
| C(20)-C(21)-H(21) | 119.5      |
| C(12)-C(21)-H(21) | 119.5      |
| C(23)-C(22)-C(27) | 119.34(11) |
| C(23)-C(22)-C(10) | 117.85(10) |
| C(27)-C(22)-C(10) | 122.59(11) |
| C(24)-C(23)-C(22) | 120.46(12) |
| C(24)-C(23)-H(23) | 119.8      |
| C(22)-C(23)-H(23) | 119.8      |
| C(25)-C(24)-C(23) | 119.93(12) |
| C(25)-C(24)-H(24) | 120.0      |
| C(23)-C(24)-H(24) | 120.0      |
| C(24)-C(25)-C(26) | 119.74(12) |
| C(24)-C(25)-H(25) | 120.1      |
| C(26)-C(25)-H(25) | 120.1      |
| C(27)-C(26)-C(25) | 120.73(12) |
| C(27)-C(26)-H(26) | 119.6      |
| C(25)-C(26)-H(26) | 119.6      |
| C(26)-C(27)-C(22) | 119.67(12) |
| C(26)-C(27)-H(27) | 120.2      |
| C(22)-C(27)-H(27) | 120.2      |

|                  |           |
|------------------|-----------|
| C(11)-N(1)-C(1)  | 127.59(9) |
| C(11)-N(1)-C(9)  | 111.19(9) |
| C(1)-N(1)-C(9)   | 120.98(9) |
| C(11)-O(1)-C(10) | 108.12(9) |

---

Table S-16. Anisotropic displacement parameters ( $\approx 2 \times 10^3$ ) for **10a**. The anisotropic displacement factor exponent takes the form:  $-2\pi^2 [ h^2 a^{*2}U^{11} + \dots + 2 h k a^* b^* U^{12} ]$

|       | U <sup>11</sup> | U <sup>22</sup> | U <sup>33</sup> | U <sup>23</sup> | U <sup>13</sup> | U <sup>12</sup> |
|-------|-----------------|-----------------|-----------------|-----------------|-----------------|-----------------|
| C(1)  | 16(1)           | 19(1)           | 9(1)            | 1(1)            | 0(1)            | 4(1)            |
| C(2)  | 17(1)           | 23(1)           | 12(1)           | 3(1)            | 2(1)            | 3(1)            |
| C(3)  | 18(1)           | 29(1)           | 13(1)           | 3(1)            | 3(1)            | 8(1)            |
| C(4)  | 25(1)           | 22(1)           | 15(1)           | 2(1)            | 3(1)            | 9(1)            |
| C(5)  | 22(1)           | 20(1)           | 15(1)           | 3(1)            | 2(1)            | 3(1)            |
| C(6)  | 17(1)           | 20(1)           | 10(1)           | 2(1)            | 1(1)            | 3(1)            |
| C(7)  | 18(1)           | 18(1)           | 18(1)           | 3(1)            | 5(1)            | 0(1)            |
| C(8)  | 15(1)           | 20(1)           | 15(1)           | 1(1)            | 4(1)            | 2(1)            |
| C(9)  | 16(1)           | 18(1)           | 14(1)           | 2(1)            | 5(1)            | 3(1)            |
| C(10) | 15(1)           | 19(1)           | 15(1)           | 3(1)            | 3(1)            | 1(1)            |
| C(11) | 17(1)           | 19(1)           | 10(1)           | 1(1)            | 0(1)            | 1(1)            |
| C(12) | 18(1)           | 13(1)           | 14(1)           | 2(1)            | 4(1)            | 2(1)            |
| C(13) | 20(1)           | 15(1)           | 15(1)           | 2(1)            | 6(1)            | 2(1)            |
| C(14) | 22(1)           | 13(1)           | 16(1)           | 2(1)            | 3(1)            | 3(1)            |
| C(15) | 22(1)           | 21(1)           | 19(1)           | 3(1)            | 3(1)            | 2(1)            |
| C(16) | 24(1)           | 23(1)           | 23(1)           | 3(1)            | -3(1)           | 1(1)            |
| C(17) | 36(1)           | 22(1)           | 14(1)           | 2(1)            | -2(1)           | 5(1)            |
| C(18) | 33(1)           | 20(1)           | 15(1)           | 2(1)            | 6(1)            | 6(1)            |
| C(19) | 26(1)           | 13(1)           | 16(1)           | 2(1)            | 5(1)            | 4(1)            |
| C(20) | 26(1)           | 18(1)           | 17(1)           | 4(1)            | 10(1)           | 5(1)            |
| C(21) | 18(1)           | 18(1)           | 18(1)           | 4(1)            | 5(1)            | 4(1)            |
| C(22) | 22(1)           | 16(1)           | 16(1)           | 5(1)            | 5(1)            | 4(1)            |
| C(23) | 23(1)           | 21(1)           | 23(1)           | 2(1)            | 4(1)            | 5(1)            |
| C(24) | 27(1)           | 27(1)           | 38(1)           | 4(1)            | 14(1)           | 9(1)            |
| C(25) | 42(1)           | 21(1)           | 30(1)           | 2(1)            | 19(1)           | 9(1)            |
| C(26) | 37(1)           | 18(1)           | 20(1)           | 0(1)            | 7(1)            | 1(1)            |
| C(27) | 24(1)           | 18(1)           | 19(1)           | 3(1)            | 4(1)            | 2(1)            |
| N(1)  | 16(1)           | 16(1)           | 14(1)           | 2(1)            | 5(1)            | 2(1)            |
| O(1)  | 20(1)           | 17(1)           | 18(1)           | 3(1)            | 7(1)            | 2(1)            |
| O(2)  | 21(1)           | 24(1)           | 19(1)           | 4(1)            | 9(1)            | 1(1)            |

Table S-17. Hydrogen coordinates (  $\times 10^4$ ) and isotropic displacement parameters ( $\approx \times 10^{-3}$ ) for **10a**.

|       | x     | y     | z    | U(eq) |
|-------|-------|-------|------|-------|
| H(2)  | 4320  | 52    | 848  | 21    |
| H(3)  | 4979  | -2293 | 565  | 24    |
| H(4)  | 3069  | -4371 | 713  | 25    |
| H(5)  | 554   | -4080 | 1197 | 23    |
| H(7A) | -381  | -1801 | 2400 | 22    |
| H(7B) | -1669 | -2519 | 1343 | 22    |
| H(8A) | -2177 | -108  | 1914 | 20    |
| H(8B) | -1898 | -241  | 837  | 20    |
| H(10) | -1145 | 2257  | 902  | 20    |
| H(13) | 3672  | 1409  | 2948 | 20    |
| H(15) | 6368  | 1862  | 4389 | 26    |
| H(16) | 7614  | 2126  | 6068 | 30    |
| H(17) | 5820  | 2074  | 7142 | 31    |
| H(18) | 2790  | 1793  | 6527 | 27    |
| H(20) | 100   | 1487  | 5076 | 23    |
| H(21) | -1159 | 1093  | 3406 | 22    |
| H(23) | -3410 | 2824  | 1520 | 27    |
| H(24) | -4466 | 4089  | 2674 | 35    |
| H(25) | -2482 | 5481  | 4086 | 35    |
| H(26) | 549   | 5753  | 4276 | 31    |
| H(27) | 1623  | 4512  | 3123 | 25    |

Table S-18. Hydrogen bonds for **10a** [ $\approx$  and  $\infty$ ].

| D-H...A          | d(D-H) | d(H...A) | d(D...A)   | $\angle$ (DHA) |
|------------------|--------|----------|------------|----------------|
| C(2)-H(2)...O(2) | 0.95   | 2.32     | 2.9346(15) | 121.5          |

6. X-ray data for compound (*S*)-11

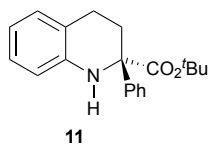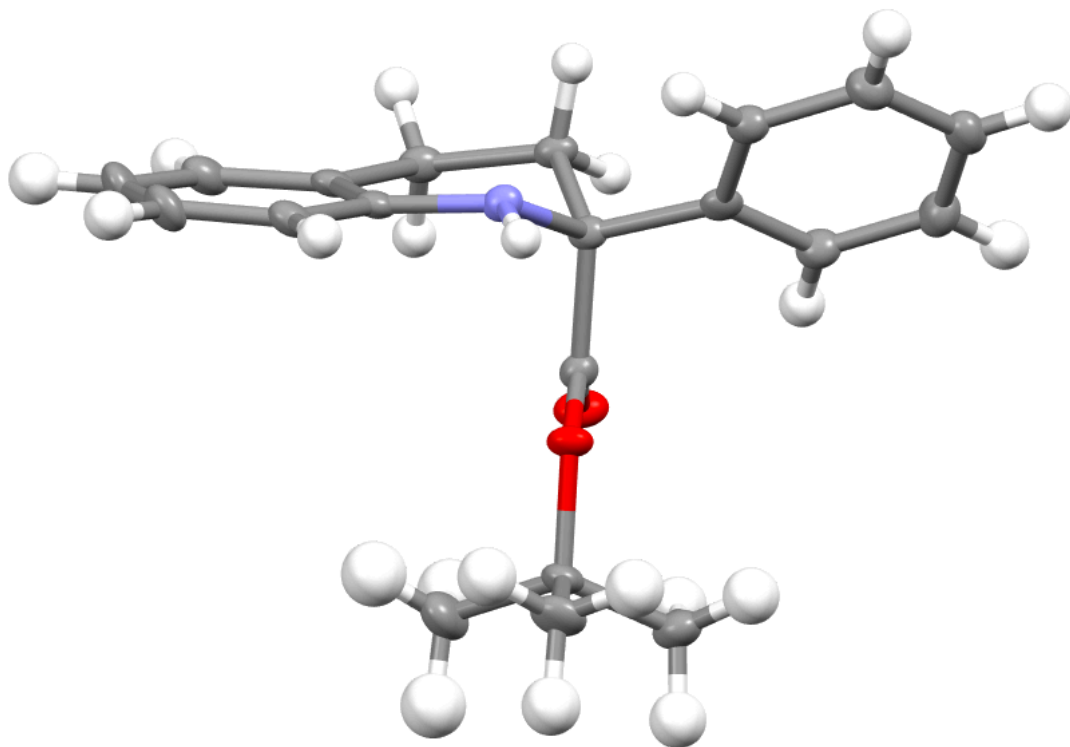

Table S-19. Crystal data and structure refinement for (S)-11.

|                                         |                                                                                 |                                                                        |
|-----------------------------------------|---------------------------------------------------------------------------------|------------------------------------------------------------------------|
| Identification code                     | OIC270A                                                                         |                                                                        |
| Empirical formula                       | C <sub>20</sub> H <sub>23</sub> N O <sub>2</sub>                                |                                                                        |
| Formula weight                          | 309.39                                                                          |                                                                        |
| Temperature                             | 100(2) K                                                                        |                                                                        |
| Wavelength                              | 1.54178 $\approx$                                                               |                                                                        |
| Crystal system                          | Orthorhombic                                                                    |                                                                        |
| Space group                             | P2 <sub>1</sub> 2 <sub>1</sub> 2 <sub>1</sub>                                   |                                                                        |
| Unit cell dimensions                    | a = 6.1094(3) $\approx$<br>b = 14.2823(6) $\approx$<br>c = 19.8409(8) $\approx$ | $\alpha = 90^\circ$ .<br>$\beta = 90^\circ$ .<br>$\gamma = 90^\circ$ . |
| Volume                                  | 1731.24(13) $\approx^3$                                                         |                                                                        |
| Z                                       | 4                                                                               |                                                                        |
| Density (calculated)                    | 1.187 Mg/m <sup>3</sup>                                                         |                                                                        |
| Absorption coefficient                  | 0.599 mm <sup>-1</sup>                                                          |                                                                        |
| F(000)                                  | 664                                                                             |                                                                        |
| Crystal size                            | 0.200 x 0.200 x 0.180 mm <sup>3</sup>                                           |                                                                        |
| Theta range for data collection         | 3.813 to 66.624 $^\circ$ .                                                      |                                                                        |
| Index ranges                            | -6 $\leq$ h $\leq$ 7, -17 $\leq$ k $\leq$ 15, -23 $\leq$ l $\leq$ 21            |                                                                        |
| Reflections collected                   | 11998                                                                           |                                                                        |
| Independent reflections                 | 3043 [R(int) = 0.0313]                                                          |                                                                        |
| Completeness to theta = 66.624 $^\circ$ | 99.4 %                                                                          |                                                                        |
| Absorption correction                   | Semi-empirical from equivalents                                                 |                                                                        |
| Max. and min. transmission              | 0.92 and 0.82                                                                   |                                                                        |
| Refinement method                       | Full-matrix least-squares on F <sup>2</sup>                                     |                                                                        |
| Data / restraints / parameters          | 3043 / 0 / 211                                                                  |                                                                        |
| Goodness-of-fit on F <sup>2</sup>       | 1.091                                                                           |                                                                        |
| Final R indices [I > 2 $\sigma$ (I)]    | R1 = 0.0285, wR2 = 0.0687                                                       |                                                                        |
| R indices (all data)                    | R1 = 0.0303, wR2 = 0.0698                                                       |                                                                        |
| Absolute structure parameter            | 0.08(7)                                                                         |                                                                        |
| Extinction coefficient                  | n/a                                                                             |                                                                        |
| Largest diff. peak and hole             | 0.152 and -0.169 e. $\approx^3$                                                 |                                                                        |

CCDC 1578269

Table S-20. Atomic coordinates ( $\times 10^4$ ) and equivalent isotropic displacement parameters ( $\approx^2 \times 10^3$ ) for (S)-**11**. U(eq) is defined as one third of the trace of the orthogonalized  $U^{ij}$  tensor.

|       | x        | y       | z       | U(eq) |
|-------|----------|---------|---------|-------|
| O(1)  | 7516(2)  | 5874(1) | 4361(1) | 18(1) |
| O(2)  | 4309(2)  | 5207(1) | 4663(1) | 24(1) |
| N(1)  | 9681(2)  | 4304(1) | 4728(1) | 16(1) |
| C(1)  | 5041(3)  | 7229(1) | 4350(1) | 27(1) |
| C(2)  | 6521(3)  | 6613(1) | 3932(1) | 20(1) |
| C(3)  | 6281(3)  | 5248(1) | 4683(1) | 17(1) |
| C(4)  | 7740(3)  | 4579(1) | 5103(1) | 16(1) |
| C(5)  | 9418(3)  | 3718(1) | 4167(1) | 16(1) |
| C(6)  | 11036(3) | 3694(1) | 3668(1) | 21(1) |
| C(7)  | 10914(3) | 3053(1) | 3148(1) | 26(1) |
| C(8)  | 9149(3)  | 2440(2) | 3102(1) | 29(1) |
| C(9)  | 5353(4)  | 6166(2) | 3338(1) | 35(1) |
| C(10) | 8522(3)  | 7152(1) | 3703(1) | 29(1) |
| C(11) | 6450(3)  | 3687(1) | 5280(1) | 17(1) |
| C(12) | 5878(3)  | 3100(1) | 4662(1) | 20(1) |
| C(13) | 7622(3)  | 3107(1) | 4125(1) | 18(1) |
| C(14) | 7523(3)  | 2484(1) | 3586(1) | 24(1) |
| C(15) | 8359(3)  | 5062(1) | 5762(1) | 17(1) |
| C(16) | 10432(3) | 4961(1) | 6043(1) | 20(1) |
| C(17) | 10877(3) | 5319(1) | 6680(1) | 24(1) |
| C(18) | 9274(3)  | 5787(1) | 7041(1) | 24(1) |
| C(19) | 7218(3)  | 5901(1) | 6758(1) | 25(1) |
| C(20) | 6765(3)  | 5543(1) | 6127(1) | 22(1) |



Table S-21. Bond lengths [ $\text{\AA}$ ] and angles [ $^\circ$ ] for (S)-**11**.

---

|             |          |
|-------------|----------|
| O(1)-C(3)   | 1.334(2) |
| O(1)-C(2)   | 1.485(2) |
| O(2)-C(3)   | 1.207(2) |
| N(1)-C(5)   | 1.401(2) |
| N(1)-C(4)   | 1.454(2) |
| N(1)-H(1N)  | 0.9023   |
| C(1)-C(2)   | 1.510(3) |
| C(1)-H(5)   | 0.9800   |
| C(1)-H(1)   | 0.9800   |
| C(1)-H(6)   | 0.9800   |
| C(2)-C(10)  | 1.515(3) |
| C(2)-C(9)   | 1.518(3) |
| C(3)-C(4)   | 1.549(2) |
| C(4)-C(15)  | 1.527(2) |
| C(4)-C(11)  | 1.538(2) |
| C(5)-C(6)   | 1.400(2) |
| C(5)-C(13)  | 1.404(2) |
| C(6)-C(7)   | 1.380(3) |
| C(6)-H(14)  | 0.9500   |
| C(7)-C(8)   | 1.392(3) |
| C(7)-H(15)  | 0.9500   |
| C(8)-C(14)  | 1.383(3) |
| C(8)-H(2)   | 0.9500   |
| C(9)-H(24)  | 0.9800   |
| C(9)-H(4)   | 0.9800   |
| C(9)-H(3)   | 0.9800   |
| C(10)-H(9)  | 0.9800   |
| C(10)-H(7)  | 0.9800   |
| C(10)-H(8)  | 0.9800   |
| C(11)-C(12) | 1.525(2) |
| C(11)-H(17) | 0.9900   |
| C(11)-H(18) | 0.9900   |
| C(12)-C(13) | 1.508(2) |
| C(12)-H(16) | 0.9900   |
| C(12)-H(10) | 0.9900   |
| C(13)-C(14) | 1.392(3) |

|             |          |
|-------------|----------|
| C(14)-H(11) | 0.9500   |
| C(15)-C(16) | 1.391(2) |
| C(15)-C(20) | 1.394(2) |
| C(16)-C(17) | 1.390(3) |
| C(16)-H(23) | 0.9500   |
| C(17)-C(18) | 1.385(3) |
| C(17)-H(22) | 0.9500   |
| C(18)-C(19) | 1.386(3) |
| C(18)-H(19) | 0.9500   |
| C(19)-C(20) | 1.380(3) |
| C(19)-H(21) | 0.9500   |
| C(20)-H(20) | 0.9500   |

|                  |            |
|------------------|------------|
| C(3)-O(1)-C(2)   | 121.31(13) |
| C(5)-N(1)-C(4)   | 118.28(13) |
| C(5)-N(1)-H(1N)  | 112.6      |
| C(4)-N(1)-H(1N)  | 114.6      |
| C(2)-C(1)-H(5)   | 109.5      |
| C(2)-C(1)-H(1)   | 109.5      |
| H(5)-C(1)-H(1)   | 109.5      |
| C(2)-C(1)-H(6)   | 109.5      |
| H(5)-C(1)-H(6)   | 109.5      |
| H(1)-C(1)-H(6)   | 109.5      |
| O(1)-C(2)-C(1)   | 110.14(13) |
| O(1)-C(2)-C(10)  | 101.72(14) |
| C(1)-C(2)-C(10)  | 110.62(15) |
| O(1)-C(2)-C(9)   | 109.77(15) |
| C(1)-C(2)-C(9)   | 112.95(17) |
| C(10)-C(2)-C(9)  | 111.08(16) |
| O(2)-C(3)-O(1)   | 125.53(16) |
| O(2)-C(3)-C(4)   | 124.21(15) |
| O(1)-C(3)-C(4)   | 110.26(13) |
| N(1)-C(4)-C(15)  | 111.00(13) |
| N(1)-C(4)-C(11)  | 108.16(13) |
| C(15)-C(4)-C(11) | 107.78(13) |
| N(1)-C(4)-C(3)   | 111.15(13) |
| C(15)-C(4)-C(3)  | 108.87(13) |
| C(11)-C(4)-C(3)  | 109.81(13) |

|                   |            |
|-------------------|------------|
| C(6)-C(5)-N(1)    | 119.70(15) |
| C(6)-C(5)-C(13)   | 119.58(16) |
| N(1)-C(5)-C(13)   | 120.57(15) |
| C(7)-C(6)-C(5)    | 120.46(16) |
| C(7)-C(6)-H(14)   | 119.8      |
| C(5)-C(6)-H(14)   | 119.8      |
| C(6)-C(7)-C(8)    | 120.52(17) |
| C(6)-C(7)-H(15)   | 119.7      |
| C(8)-C(7)-H(15)   | 119.7      |
| C(14)-C(8)-C(7)   | 118.82(17) |
| C(14)-C(8)-H(2)   | 120.6      |
| C(7)-C(8)-H(2)    | 120.6      |
| C(2)-C(9)-H(24)   | 109.5      |
| C(2)-C(9)-H(4)    | 109.5      |
| H(24)-C(9)-H(4)   | 109.5      |
| C(2)-C(9)-H(3)    | 109.5      |
| H(24)-C(9)-H(3)   | 109.5      |
| H(4)-C(9)-H(3)    | 109.5      |
| C(2)-C(10)-H(9)   | 109.5      |
| C(2)-C(10)-H(7)   | 109.5      |
| H(9)-C(10)-H(7)   | 109.5      |
| C(2)-C(10)-H(8)   | 109.5      |
| H(9)-C(10)-H(8)   | 109.5      |
| H(7)-C(10)-H(8)   | 109.5      |
| C(12)-C(11)-C(4)  | 112.90(14) |
| C(12)-C(11)-H(17) | 109.0      |
| C(4)-C(11)-H(17)  | 109.0      |
| C(12)-C(11)-H(18) | 109.0      |
| C(4)-C(11)-H(18)  | 109.0      |
| H(17)-C(11)-H(18) | 107.8      |
| C(13)-C(12)-C(11) | 113.75(14) |
| C(13)-C(12)-H(16) | 108.8      |
| C(11)-C(12)-H(16) | 108.8      |
| C(13)-C(12)-H(10) | 108.8      |
| C(11)-C(12)-H(10) | 108.8      |
| H(16)-C(12)-H(10) | 107.7      |
| C(14)-C(13)-C(5)  | 118.51(17) |
| C(14)-C(13)-C(12) | 120.54(15) |

|                   |            |
|-------------------|------------|
| C(5)-C(13)-C(12)  | 120.91(15) |
| C(8)-C(14)-C(13)  | 122.07(17) |
| C(8)-C(14)-H(11)  | 119.0      |
| C(13)-C(14)-H(11) | 119.0      |
| C(16)-C(15)-C(20) | 118.60(16) |
| C(16)-C(15)-C(4)  | 121.48(15) |
| C(20)-C(15)-C(4)  | 119.64(15) |
| C(17)-C(16)-C(15) | 120.29(17) |
| C(17)-C(16)-H(23) | 119.9      |
| C(15)-C(16)-H(23) | 119.9      |
| C(18)-C(17)-C(16) | 120.64(17) |
| C(18)-C(17)-H(22) | 119.7      |
| C(16)-C(17)-H(22) | 119.7      |
| C(17)-C(18)-C(19) | 119.14(17) |
| C(17)-C(18)-H(19) | 120.4      |
| C(19)-C(18)-H(19) | 120.4      |
| C(20)-C(19)-C(18) | 120.43(17) |
| C(20)-C(19)-H(21) | 119.8      |
| C(18)-C(19)-H(21) | 119.8      |
| C(19)-C(20)-C(15) | 120.89(17) |
| C(19)-C(20)-H(20) | 119.6      |
| C(15)-C(20)-H(20) | 119.6      |

---

Table S-22. Anisotropic displacement parameters ( $\approx 2 \times 10^3$ ) for (S)-**11**. The anisotropic displacement factor exponent takes the form:  $-2\pi^2 [ h^2 a^{*2} U^{11} + \dots + 2 h k a^* b^* U^{12} ]$

|       | U <sup>11</sup> | U <sup>22</sup> | U <sup>33</sup> | U <sup>23</sup> | U <sup>13</sup> | U <sup>12</sup> |
|-------|-----------------|-----------------|-----------------|-----------------|-----------------|-----------------|
| O(1)  | 16(1)           | 17(1)           | 22(1)           | 7(1)            | 0(1)            | 0(1)            |
| O(2)  | 13(1)           | 23(1)           | 35(1)           | 7(1)            | -2(1)           | -1(1)           |
| N(1)  | 12(1)           | 16(1)           | 21(1)           | 2(1)            | 2(1)            | -2(1)           |
| C(1)  | 30(1)           | 21(1)           | 31(1)           | 4(1)            | 3(1)            | 5(1)            |
| C(2)  | 23(1)           | 19(1)           | 17(1)           | 6(1)            | -2(1)           | 1(1)            |
| C(3)  | 16(1)           | 15(1)           | 20(1)           | 1(1)            | 1(1)            | -1(1)           |
| C(4)  | 12(1)           | 16(1)           | 20(1)           | 2(1)            | 1(1)            | 0(1)            |
| C(5)  | 16(1)           | 16(1)           | 17(1)           | 5(1)            | -3(1)           | 1(1)            |
| C(6)  | 18(1)           | 25(1)           | 18(1)           | 6(1)            | -4(1)           | -2(1)           |
| C(7)  | 29(1)           | 35(1)           | 14(1)           | 2(1)            | 2(1)            | -2(1)           |
| C(8)  | 39(1)           | 32(1)           | 15(1)           | -1(1)           | -4(1)           | -4(1)           |
| C(9)  | 48(1)           | 34(1)           | 24(1)           | 1(1)            | -11(1)          | -4(1)           |
| C(10) | 30(1)           | 30(1)           | 27(1)           | 13(1)           | 2(1)            | -3(1)           |
| C(11) | 13(1)           | 15(1)           | 24(1)           | 5(1)            | 1(1)            | -1(1)           |
| C(12) | 16(1)           | 18(1)           | 25(1)           | 4(1)            | -2(1)           | -3(1)           |
| C(13) | 20(1)           | 17(1)           | 18(1)           | 7(1)            | -5(1)           | 0(1)            |
| C(14) | 27(1)           | 25(1)           | 21(1)           | 5(1)            | -7(1)           | -6(1)           |
| C(15) | 17(1)           | 13(1)           | 22(1)           | 6(1)            | 3(1)            | -2(1)           |
| C(16) | 18(1)           | 20(1)           | 23(1)           | 2(1)            | 2(1)            | 1(1)            |
| C(17) | 20(1)           | 28(1)           | 25(1)           | 4(1)            | -2(1)           | -2(1)           |
| C(18) | 29(1)           | 22(1)           | 20(1)           | 2(1)            | 1(1)            | -4(1)           |
| C(19) | 25(1)           | 24(1)           | 26(1)           | -2(1)           | 6(1)            | 1(1)            |
| C(20) | 16(1)           | 22(1)           | 26(1)           | 2(1)            | 1(1)            | 2(1)            |

Table S-23. Hydrogen coordinates (  $\times 10^4$ ) and isotropic displacement parameters ( $\approx \times 10^{-3}$ ) for (*S*)-**11**.

|       | x     | y    | z    | U(eq) |
|-------|-------|------|------|-------|
| H(1N) | 10642 | 4772 | 4651 | 20    |
| H(5)  | 3752  | 6870 | 4491 | 40    |
| H(1)  | 4576  | 7769 | 4082 | 40    |
| H(6)  | 5835  | 7447 | 4750 | 40    |
| H(14) | 12226 | 4121 | 3687 | 25    |
| H(15) | 12043 | 3031 | 2820 | 31    |
| H(2)  | 9063  | 1999 | 2745 | 34    |
| H(24) | 6346  | 5729 | 3112 | 53    |
| H(4)  | 4899  | 6654 | 3021 | 53    |
| H(3)  | 4061  | 5827 | 3500 | 53    |
| H(9)  | 9271  | 7417 | 4096 | 43    |
| H(7)  | 8071  | 7660 | 3400 | 43    |
| H(8)  | 9518  | 6730 | 3463 | 43    |
| H(17) | 7329  | 3303 | 5595 | 21    |
| H(18) | 5082  | 3867 | 5514 | 21    |
| H(16) | 5624  | 2445 | 4807 | 24    |
| H(10) | 4496  | 3337 | 4466 | 24    |
| H(11) | 6300  | 2077 | 3550 | 29    |
| H(23) | 11548 | 4647 | 5798 | 24    |
| H(22) | 12293 | 5242 | 6869 | 29    |
| H(19) | 9581  | 6026 | 7478 | 29    |
| H(21) | 6114  | 6229 | 6999 | 30    |
| H(20) | 5348  | 5625 | 5939 | 26    |

Table S-24. Hydrogen bonds for (*S*)-**11** [ $\approx$  and  $\infty$ ].

| D-H...A             | d(D-H) | d(H...A) | d(D...A)   | <(DHA) |
|---------------------|--------|----------|------------|--------|
| C(9)-H(3)...O(2)    | 0.98   | 2.48     | 3.032(2)   | 115.5  |
| C(1)-H(5)...O(2)    | 0.98   | 2.42     | 2.987(2)   | 116.1  |
| C(9)-H(3)...O(2)    | 0.98   | 2.48     | 3.032(2)   | 115.5  |
| C(1)-H(5)...O(2)    | 0.98   | 2.42     | 2.987(2)   | 116.1  |
| N(1)-H(1N)...O(2)#1 | 0.90   | 2.33     | 3.1104(18) | 145.4  |
| N(1)-H(1N)...O(2)#1 | 0.90   | 2.33     | 3.1104(18) | 145.4  |
| C(1)-H(5)...O(2)    | 0.98   | 2.42     | 2.987(2)   | 116.1  |
| C(9)-H(3)...O(2)    | 0.98   | 2.48     | 3.032(2)   | 115.5  |

Symmetry transformations used to generate equivalent atoms:

#1  $x+1,y,z$

## 7. Variable temperature NMR spectra for tetrahydroquinoline **2a**

Tetrahydroquinoline **2a** (40 mg, 0.13 mmol) in  $d_8$ -THF (0.7 mL) was placed in an NMR tube in an NMR spectrometer and was warmed gradually from  $-78$  °C. Warming allowed coalescence of several signals; for example, for the *t*-butyl protons at about 1.4 ppm, which occurred at approximately  $-38$  °C as shown below.

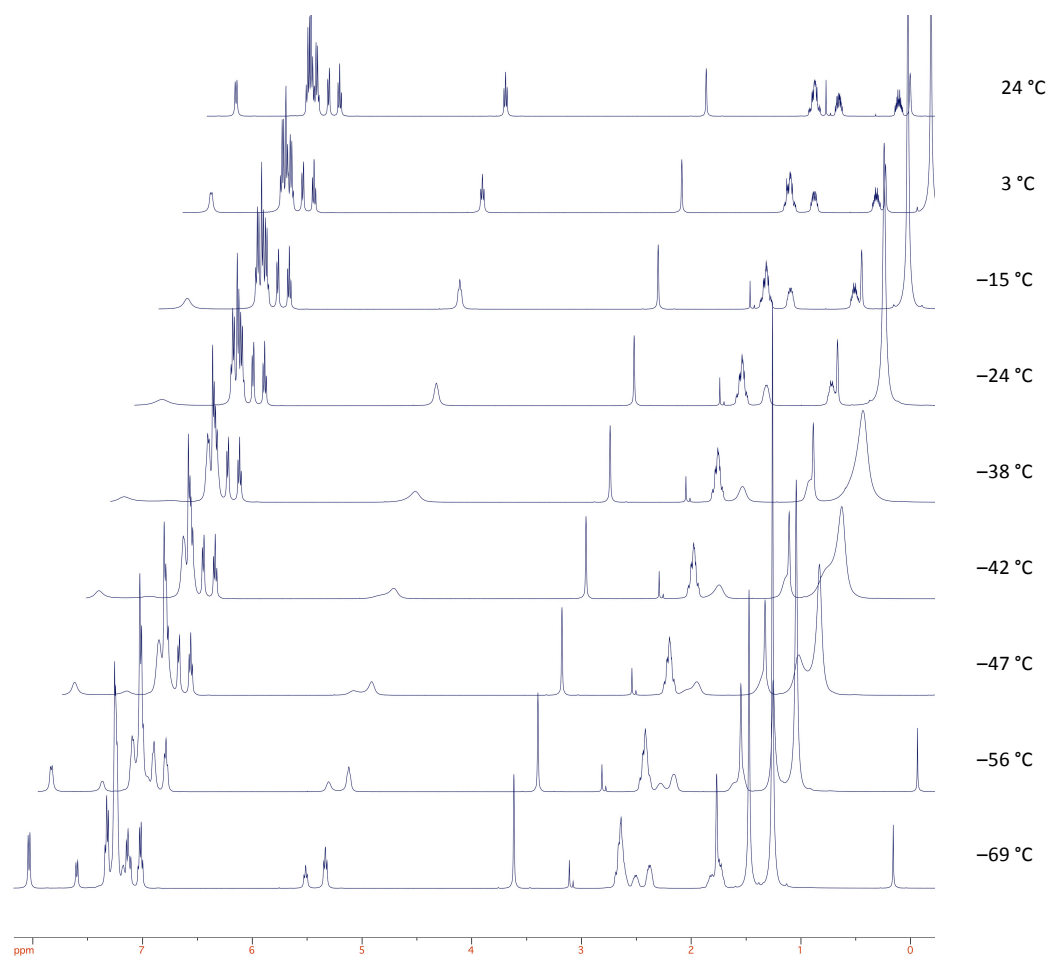

Using line shape analysis to determine  $\Delta H^\ddagger$  and  $\Delta S^\ddagger$ :

Rate constant at temperatures pre-coalescence:  $k = [(\Delta\nu_{AB}^0)^2 - (\Delta\nu_{AB})^2]^{1/2} \pi / \sqrt{2}$

and at coalescence ( $\sim 231$  K):  $k = (\Delta\nu_{AB}^0) \pi / \sqrt{2}$

and post-coalescence:  $k = (\Delta\nu_{AB}^0)^2 \pi / 2(\Delta\nu_{1/2} - \Delta\nu_{1/2}^0)$

These equations gave the following data:

Table S-25. Parameters for the line shape analysis.



| T/K   | 1/T      | $\Delta v_{AB}^{\circ}$ | $\Delta v_{AB}$ | $\Delta v_{1/2}$ | $k$       | $\ln(k/T)$ |
|-------|----------|-------------------------|-----------------|------------------|-----------|------------|
| 204.5 | 0.004890 | 107                     | 107             |                  | –         | –          |
| 213   | 0.004695 | 107                     | 105.86          |                  | 34.605    | -1.81731   |
| 217.4 | 0.004600 | 107                     | 104.29          |                  | 53.157    | -1.40849   |
| 223   | 0.004484 | 107                     | 98.9            |                  | 90.720    | -0.89939   |
| 226.3 | 0.004419 | 107                     | 84.22           |                  | 146.615   | -0.43405   |
| 231   | 0.004329 | 107                     | 50.2            |                  | 209.911   | 0.02857    |
| 235   | 0.004255 | 107                     |                 |                  | 237.694   | 0.33643    |
| 240   | 0.004167 | 107                     |                 | 35.45            | 542.096   | 0.81480    |
| 249   | 0.004016 | 107                     |                 | 15.224           | 1388.836  | 1.71877    |
| 257.9 | 0.003877 | 107                     |                 | 8.028            | 3126.027  | 2.49495    |
| 267   | 0.003745 | 107                     |                 | 5.08             | 6411.420  | 3.17859    |
| 276   | 0.003623 | 107                     |                 | 3.687            | 12736.567 | 3.83183    |

$\Delta v_{1/2}^{\circ}$  (width of baseline peak 2.275 Hz)

An Eyring plot of  $1/T$  against  $\ln(k/T)$  can be drawn for these data from which the enthalpy and entropy can be obtained. However, these values assume an equal proportion (1:1) of each rotamer and therefore the values obtained would only be approximate. The calculated  $\Delta G^{\ddagger} \approx 45$  kJ/mol at  $-78$  °C from this line shape analysis approach, which equates to  $k = 2.8$  s $^{-1}$ ,  $t_{1/2} = 0.25$  s does tally with a fast rate of rotation (and lithiation) at low temperature.

A better approach is to carry out dynamic NMR studies and to determine rate constants from best fit spectra. This was carried out using the software iNMR. The major:minor rotamers from integration are 1.8:1 ratio. The major rotamer was assigned a rate constant  $k_1$  (determined from DNMR) as it converts to the minor rotamer and the reverse rate constant  $k_{-1}$  ( $1.8 \times k_1$ ) according to the following equation and data:

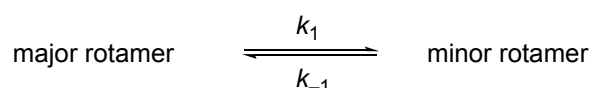

| T/K   | 1/T      | $k_1$ | $\ln(k_1/T)$ |  | $k_{-1}$ | $\ln(k_{-1}/T)$ |
|-------|----------|-------|--------------|--|----------|-----------------|
| 213   | 0.004695 | 10    | -3.058707073 |  | 18       | -2.47092        |
| 217.4 | 0.004600 | 22    | -2.290696521 |  | 39.6     | -1.70291        |
| 223   | 0.004484 | 50    | -1.495148766 |  | 90       | -0.90736        |
| 226.3 | 0.004419 | 83    | -1.003020945 |  | 149.4    | -0.41523        |
| 231   | 0.004329 | 133   | -0.552068582 |  | 239.4    | 0.03572         |
| 235   | 0.004255 | 223   | -0.052413743 |  | 401.4    | 0.53537         |
| 240   | 0.004167 | 356   | 0.394291808  |  | 640.8    | 0.98208         |
| 249   | 0.004016 | 941   | 1.329490243  |  | 1693.8   | 1.91728         |
| 257.9 | 0.003877 | 3034  | 2.465065247  |  | 5461.2   | 3.05285         |

Eyring plots of  $1/T$  against  $\ln(k/T)$  for each of the forward and backward processes are shown below (with error bars for  $\pm 4$  °C assuming variability of the temperature in the probe):

Forward direction ( $k_1$ ):

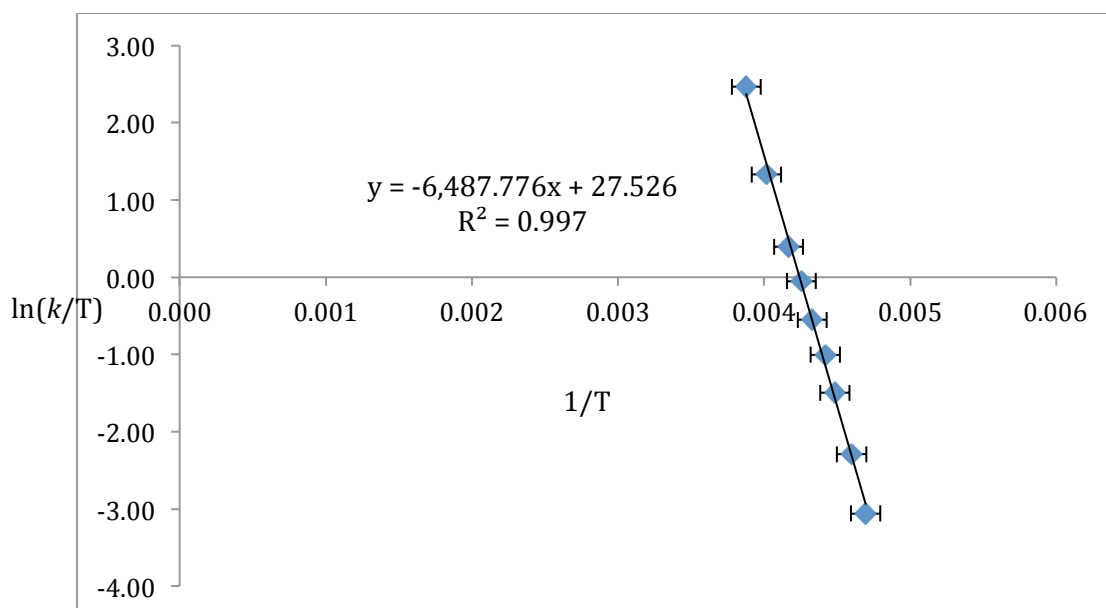

Reverse direction ( $k_{-1}$ ):

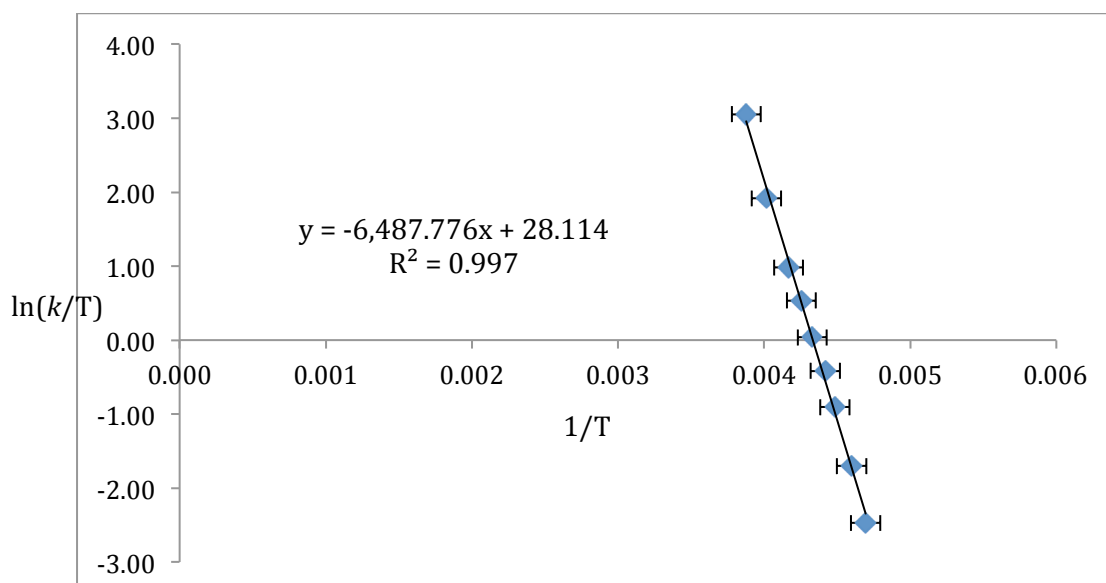

From these Eyring plots:

Forward direction  $\Delta H^\ddagger \approx 54 \text{ kJ/mol}$  and  $\Delta S^\ddagger \approx 31 \text{ J/K}\cdot\text{mol}$

$\Delta G^\ddagger \approx 47.8 \text{ kJ/mol}$  at  $-78 \text{ }^\circ\text{C}$ , that equates to  $k = 0.6 \text{ s}^{-1}$ ,  $t_{1/2} = 1.1 \text{ s}$

Reverse direction  $\Delta H^\ddagger \approx 54 \text{ kJ/mol}$  and  $\Delta S^\ddagger \approx 36 \text{ J/K}\cdot\text{mol}$

$\Delta G^\ddagger \approx 46.9 \text{ kJ/mol}$  at  $-78 \text{ }^\circ\text{C}$ , that equates to  $k = 1.1 \text{ s}^{-1}$ ,  $t_{1/2} = 0.6 \text{ s}$

## 8. CSP-HPLC traces

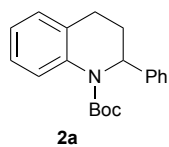

Cellulose-2 column:

|   | R <sub>t</sub> /min | Area/ mV.s | Area/% |
|---|---------------------|------------|--------|
| 1 | 5.270               | 6339.820   | 50.0   |
| 2 | 6.227               | 6336.386   | 50.0   |
|   | total               | 12676.206  | 100.0  |

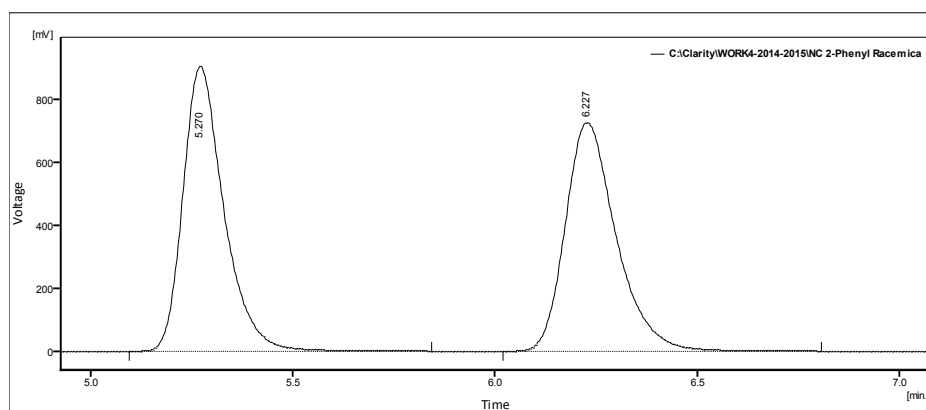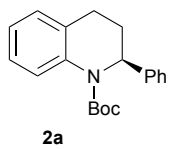

|   | R <sub>t</sub> /min | Area/ mV.s | Area/% |
|---|---------------------|------------|--------|
| 1 | 5.220               | 104.217    | 1.6    |
| 2 | 6.123               | 6285.032   | 98.4   |
|   | total               | 6389.349   | 100.0  |

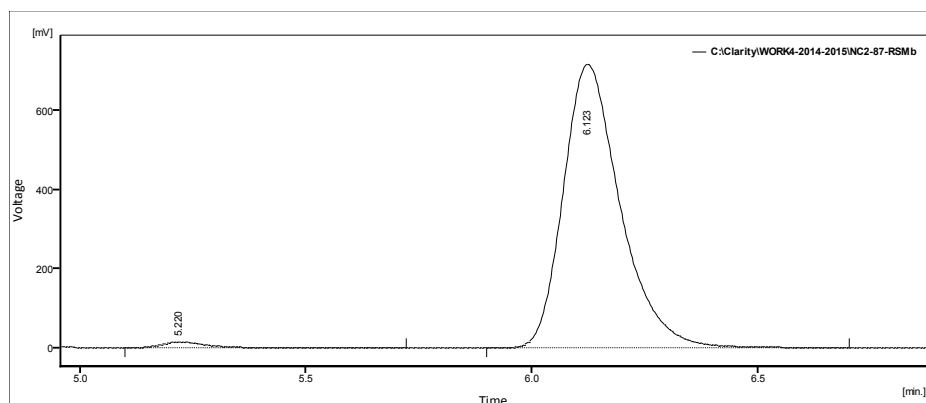

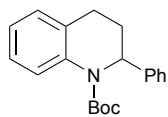

**2a**

Cellulose-1 column:

|   | R <sub>t</sub> /min | Area/ mV.s | Area/% |
|---|---------------------|------------|--------|
| 1 | 6.903               | 5158.494   | 48.8   |
| 2 | 12.637              | 5412.822   | 51.2   |
|   | total               | 11736.328  | 100.0  |

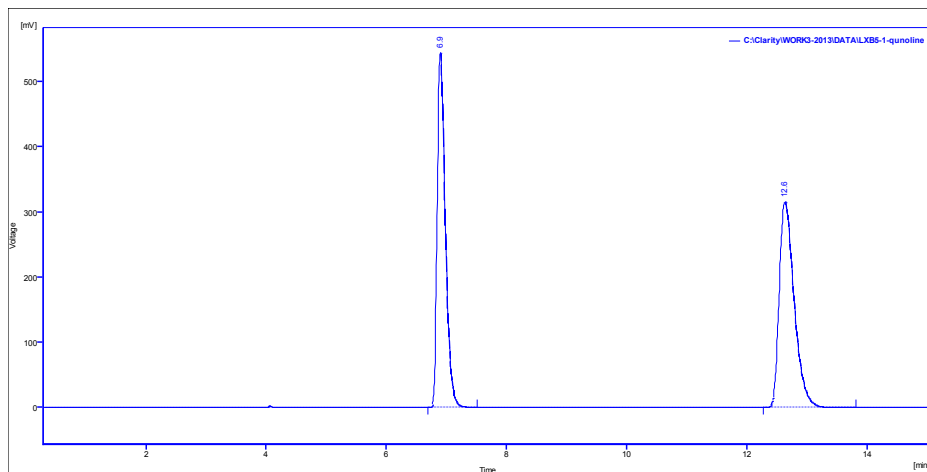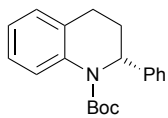

**2a**

(er 97:3)

|   | R <sub>t</sub> /min | Area/ mV.s | Area/% |
|---|---------------------|------------|--------|
| 1 | 6.890               | 376.487    | 3.2    |
| 2 | 12.837              | 11359.841  | 96.8   |
|   | total               | 11736.328  | 100.0  |

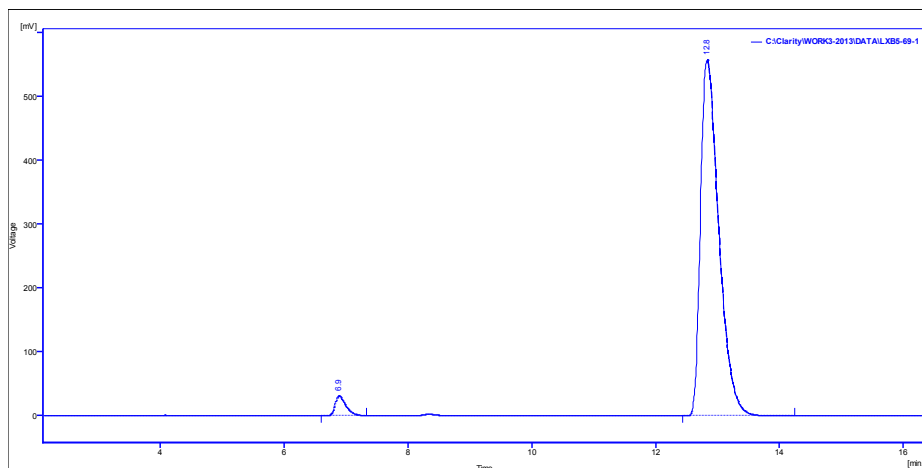

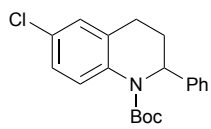

**2c**

Cellulose-2 column:

|   | R <sub>t</sub> /min | Area/ mV.s | Area/% |
|---|---------------------|------------|--------|
| 1 | 4.643               | 7182.967   | 50.0   |
| 2 | 5.583               | 7184.082   | 50.0   |
|   | total               | 14367.049  | 100.0  |

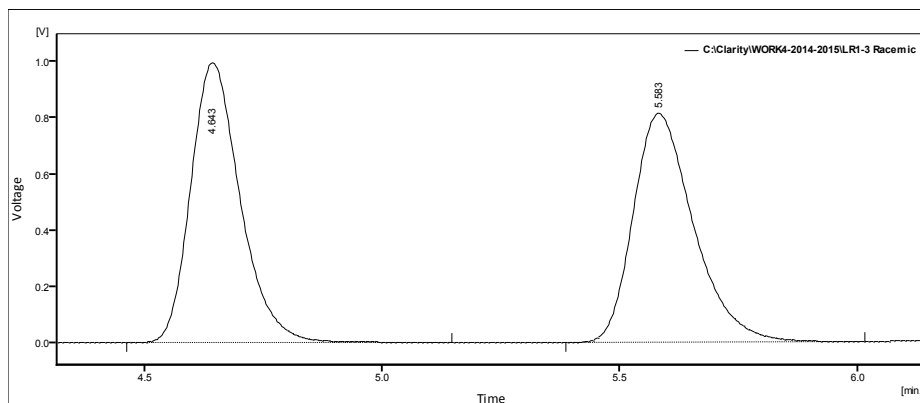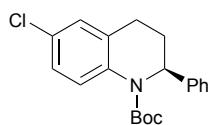

**2c**

(er 92:8)

|   | R <sub>t</sub> /min | Area/ mV.s | Area/% |
|---|---------------------|------------|--------|
| 1 | 4.557               | 617.958    | 8.0    |
| 2 | 5.443               | 7068.310   | 92.0   |
|   | total               | 7686.268   | 100.0  |

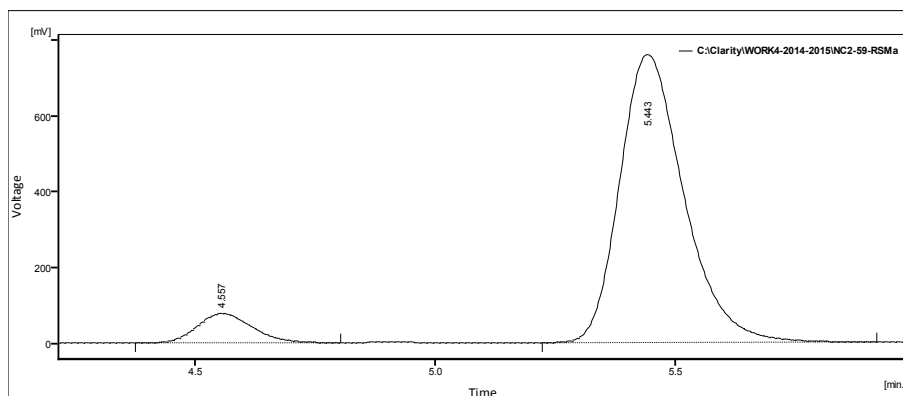

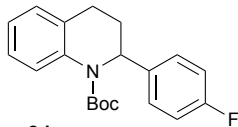

**2d**

Cellulose-2 column:

|   | R <sub>t</sub> /min | Area/ mV.s | Area/% |
|---|---------------------|------------|--------|
| 1 | 4.877               | 1816.571   | 50.0   |
| 2 | 5.843               | 1814.579   | 50.0   |
|   | total               | 3631.150   | 100.0  |

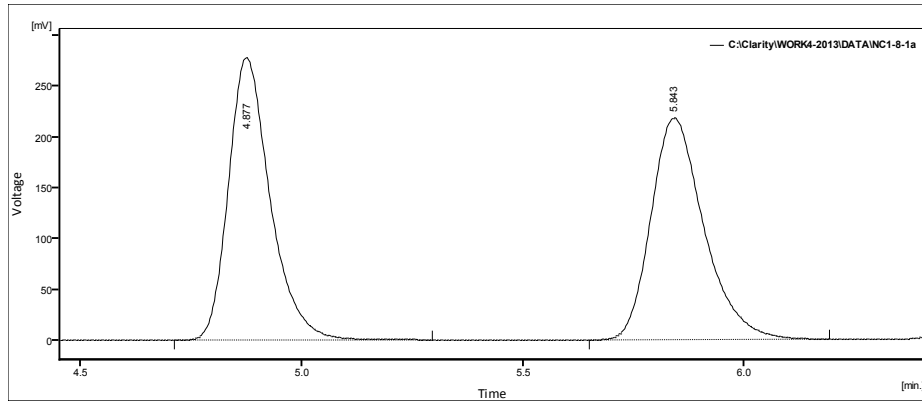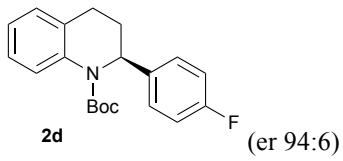

**2d**

(er 94:6)

|   | R <sub>t</sub> /min | Area/ mV.s | Area/% |
|---|---------------------|------------|--------|
| 1 | 4.987               | 650.361    | 5.8    |
| 2 | 6.163               | 10519.737  | 94.2   |
|   | total               | 11170.098  | 100.0  |

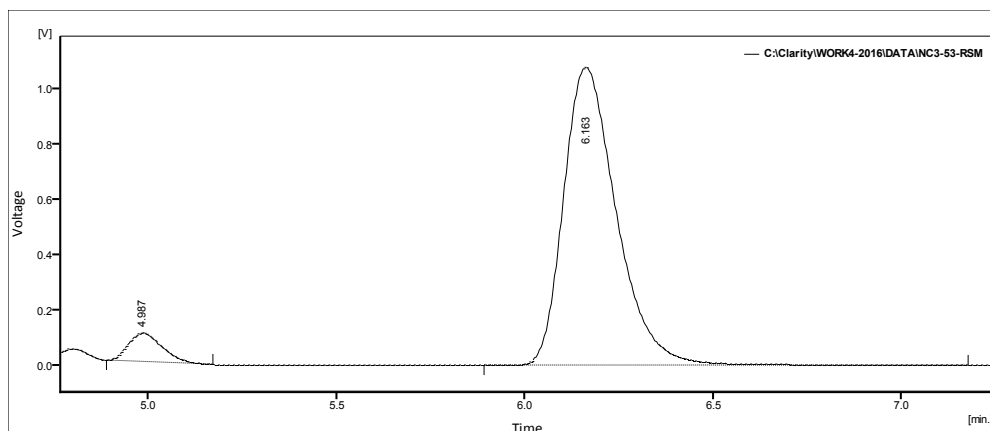

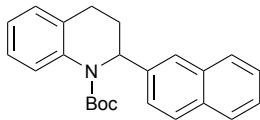

**2e**

Cellulose-2 column:

|   | R <sub>t</sub> /min | Area/ mV.s | Area/% |
|---|---------------------|------------|--------|
| 1 | 5.767               | 3967.360   | 49.8   |
| 2 | 8.803               | 3996.123   | 50.2   |
|   | total               | 7963.483   | 100.0  |

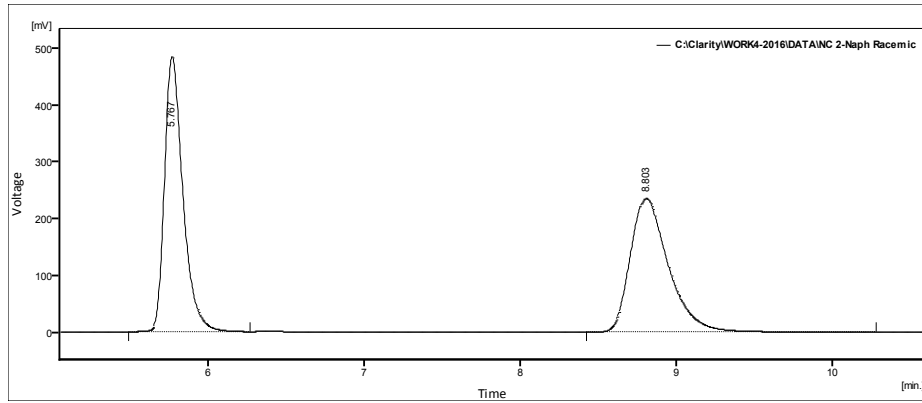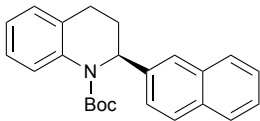

**2e**

(er 96:4)

|   | R <sub>t</sub> /min | Area/ mV.s | Area/% |
|---|---------------------|------------|--------|
| 1 | 6.083               | 36.225     | 4.3    |
| 2 | 9.073               | 805.644    | 95.7   |
|   | total               | 841.869    | 100.0  |

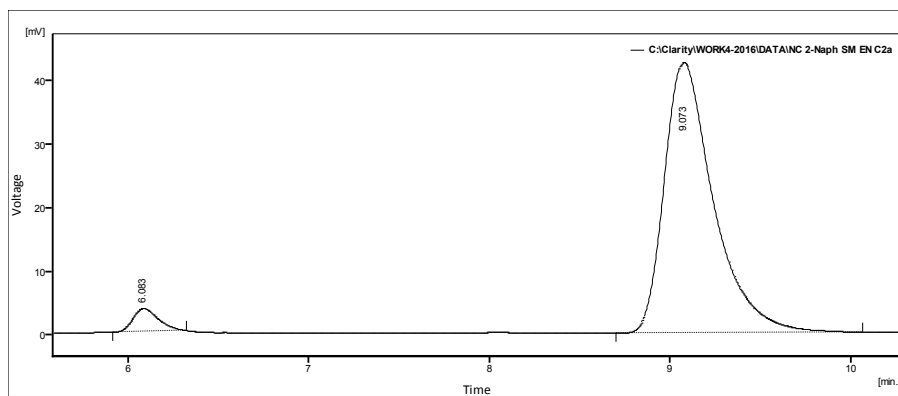

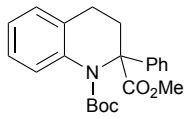

**3a**

Chiralpak IA column:

|   | R <sub>t</sub> /min | Area/ mV.s | Area/% |
|---|---------------------|------------|--------|
| 1 | 13.520              | 1580.772   | 50.0   |
| 2 | 20.883              | 1580.230   | 50.0   |
|   | total               | 3161.002   | 100.0  |

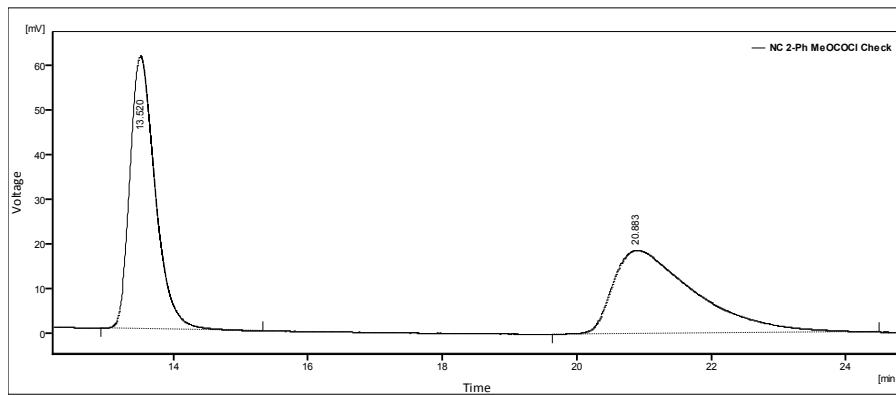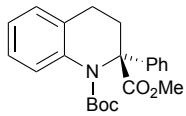

**3a**

(er 93:7)

|   | R <sub>t</sub> /min | Area/ mV.s | Area/% |
|---|---------------------|------------|--------|
| 1 | 14.400              | 655.600    | 7.4    |
| 2 | 22.510              | 8206.801   | 92.6   |
|   | total               | 8862.401   | 100.0  |

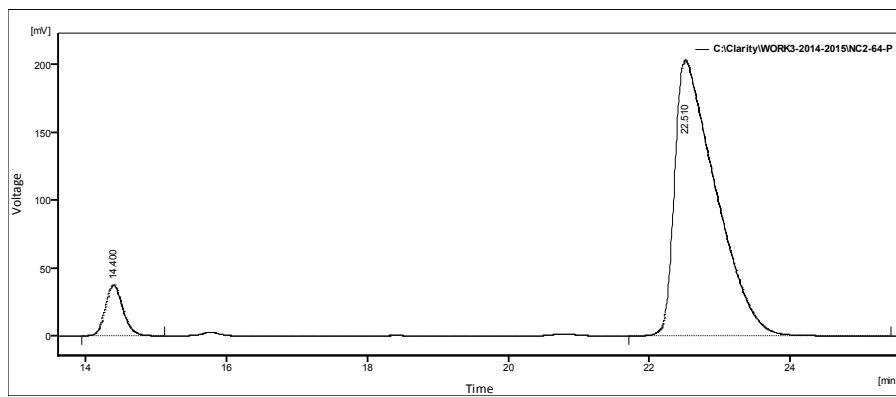



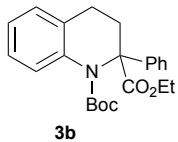

Cellulose-1 column:

|   | R <sub>t</sub> /min | Area/ mV.s | Area/% |
|---|---------------------|------------|--------|
| 1 | 11.337              | 4417.325   | 50.4   |
| 2 | 12.200              | 4340.606   | 49.6   |
|   | total               | 8757.931   | 100.0  |

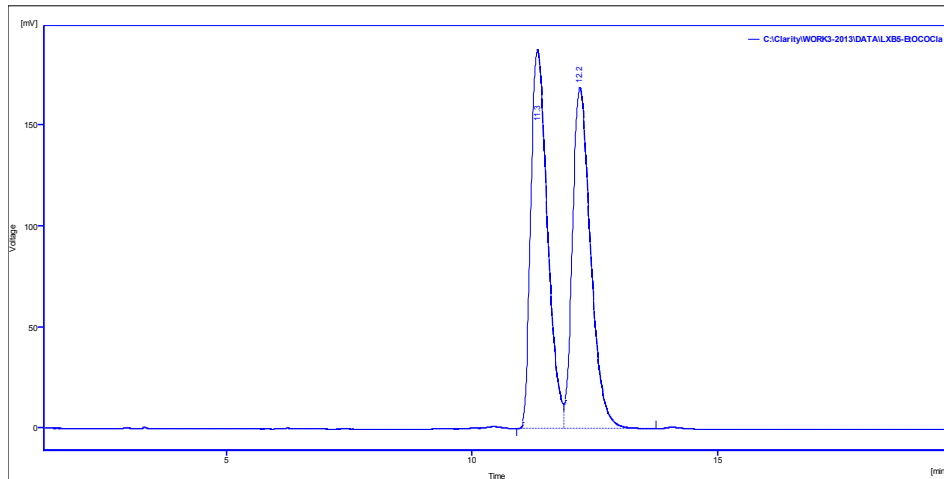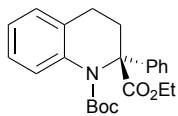

(er 97:3)

|   | R <sub>t</sub> /min | Area/ mV.s | Area/% |
|---|---------------------|------------|--------|
| 1 | 11.773              | 10375.284  | 96.6   |
| 2 | 12.850              | 362.833    | 3.4    |
|   | total               | 10738.118  | 100.0  |

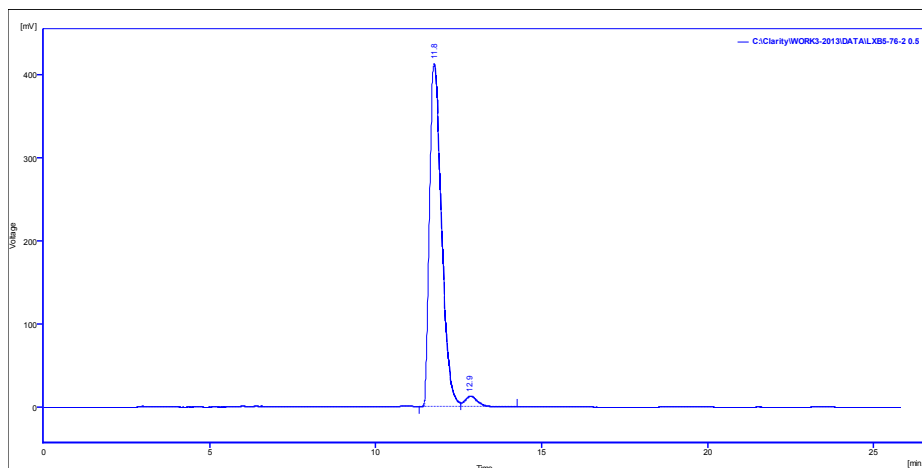

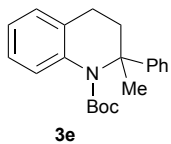

Cellulose-1 column:

|   | R <sub>t</sub> /min | Area/ mV.s | Area/% |
|---|---------------------|------------|--------|
| 1 | 5.550               | 6210.511   | 50.6   |
| 2 | 6.083               | 6062.368   | 49.4   |
|   | total               | 12272.879  | 100.0  |

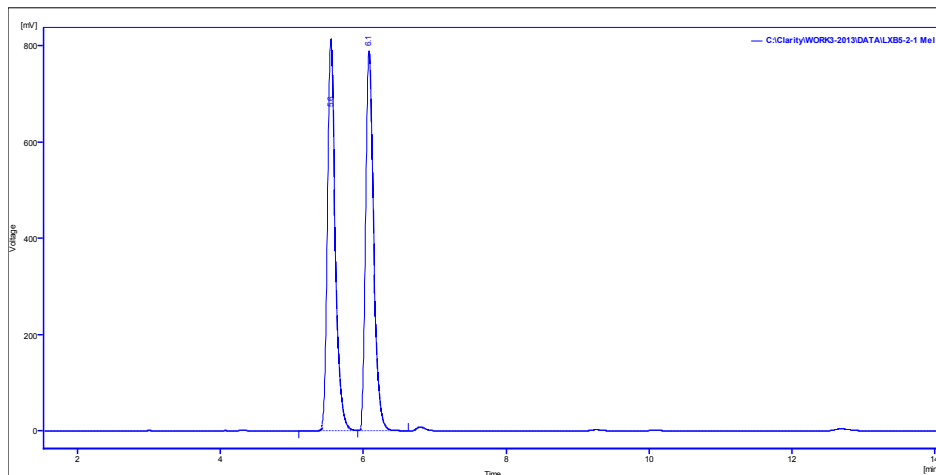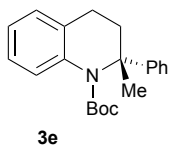

|   | R <sub>t</sub> /min | Area/ mV.s | Area/% |
|---|---------------------|------------|--------|
| 1 | 5.600               | 562.256    | 6.4    |
| 2 | 6.540               | 8281.183   | 93.6   |
|   | total               | 8843.438   | 100.0  |

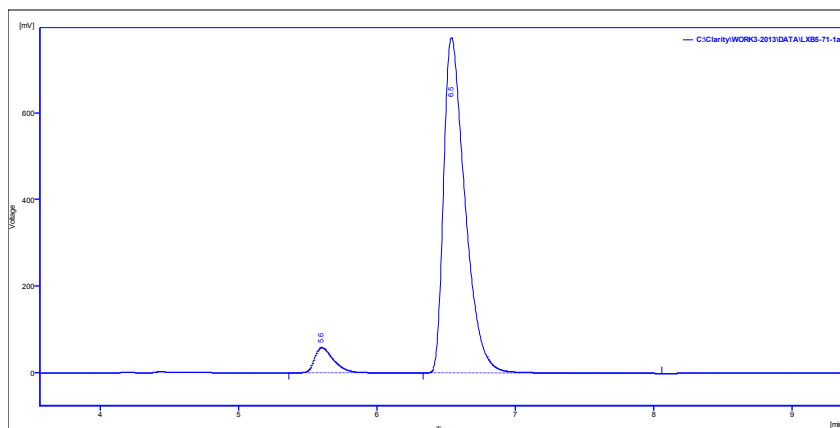

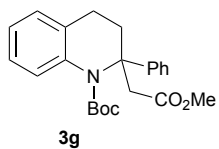

Cellulose-2 column:

|   | R <sub>t</sub> /min | Area/ mV.s | Area/% |
|---|---------------------|------------|--------|
| 1 | 18.623              | 2395.425   | 49.5   |
| 2 | 20.630              | 2441.602   | 50.5   |
|   | total               | 4837.026   | 100.0  |

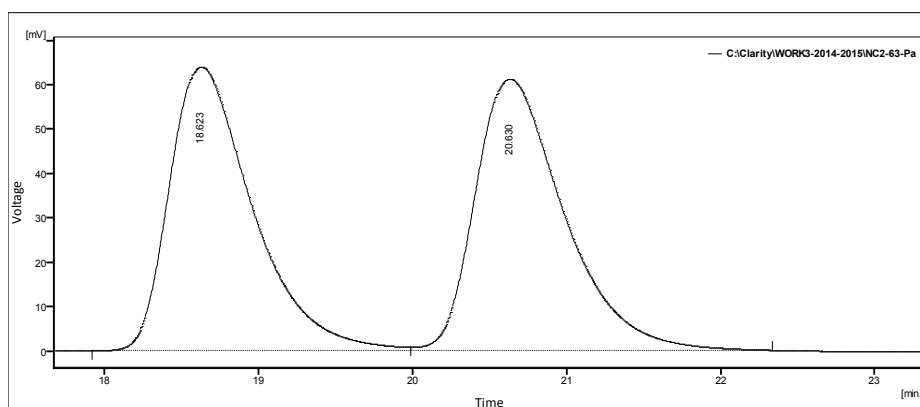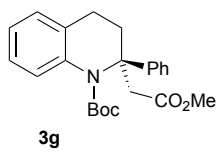

|   | R <sub>t</sub> /min | Area/ mV.s | Area/% |
|---|---------------------|------------|--------|
| 1 | 18.053              | 2011.905   | 91.7   |
| 2 | 20.107              | 182.430    | 8.3    |
|   | total               | 2194.335   | 100.0  |

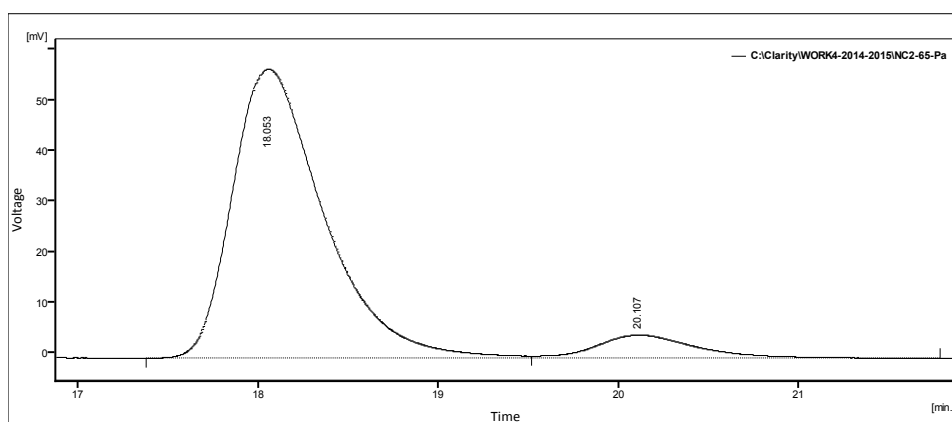

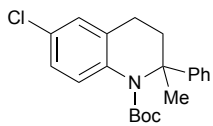

8

Chiralpak IA column:

|   | R <sub>t</sub> /min | Area/ mV.s | Area/% |
|---|---------------------|------------|--------|
| 1 | 7.220               | 4517.211   | 50.0   |
| 2 | 9.070               | 4517.369   | 50.0   |
|   | total               | 9034.579   | 100.0  |

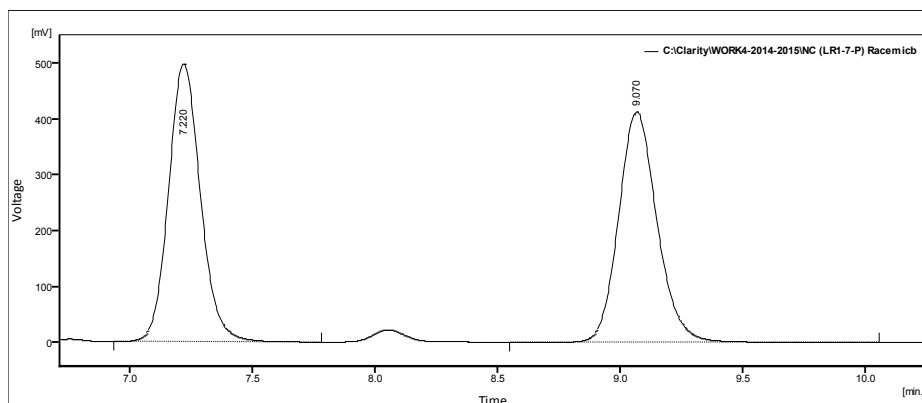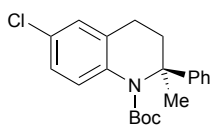

8

(er 87:13)

|   | R <sub>t</sub> /min | Area/ mV.s | Area/% |
|---|---------------------|------------|--------|
| 1 | 7.220               | 4517.211   | 50.0   |
| 2 | 9.070               | 4517.369   | 50.0   |
|   | total               | 9034.579   | 100.0  |

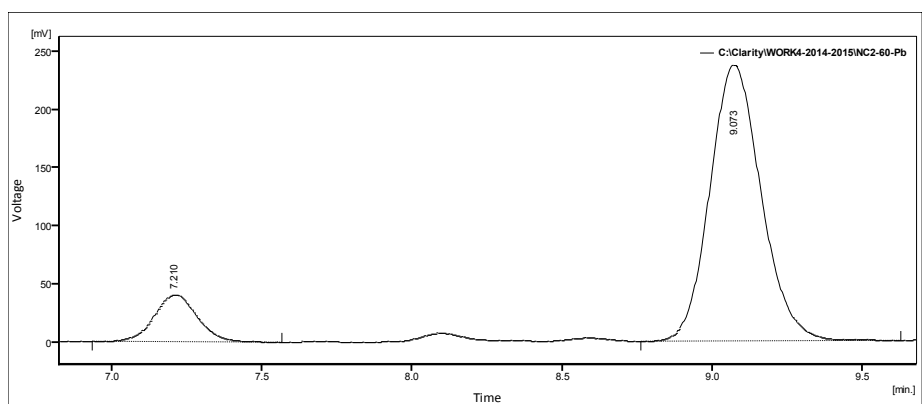

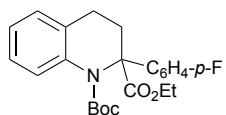

9

Cellulose-1 column:

|   | R <sub>t</sub> /min | Area/ mV.s | Area/% |
|---|---------------------|------------|--------|
| 1 | 9.460               | 3773.802   | 50.0   |
| 2 | 11.073              | 3778.984   | 50.0   |
|   | total               | 7552.786   | 100.0  |

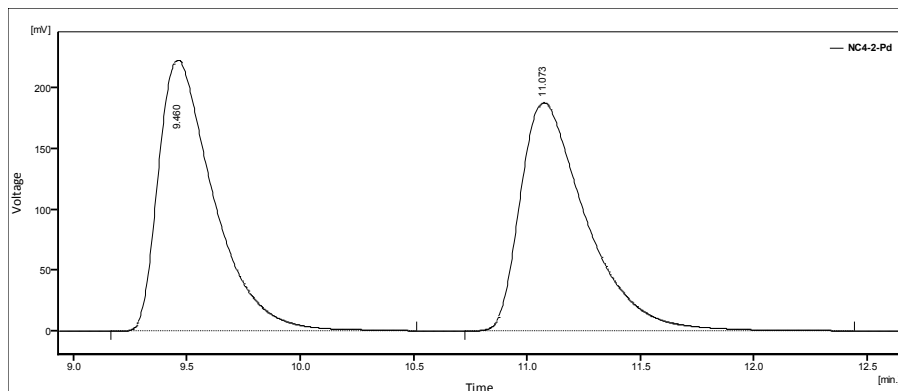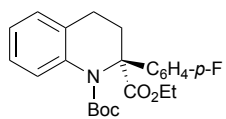

9

(er 93.5:6.5)

|   | R <sub>t</sub> /min | Area/ mV.s | Area/% |
|---|---------------------|------------|--------|
| 1 | 9.443               | 164.690    | 6.6    |
| 2 | 11.017              | 2330.459   | 93.4   |
|   | total               | 2495.150   | 100.0  |

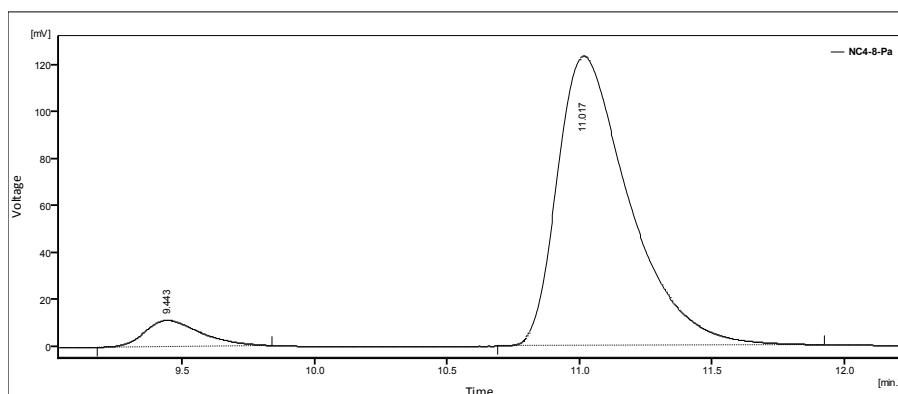

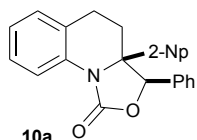

**10a** (cis)

Daicel ChiralPak IA column:

|   | R <sub>t</sub> /min | Area/ mV.s | Area/% |
|---|---------------------|------------|--------|
| 1 | 32.517              | 4074.749   | 50.0   |
| 2 | 49.890              | 4073.760   | 50.0   |
|   | total               | 8148.509   | 100.0  |

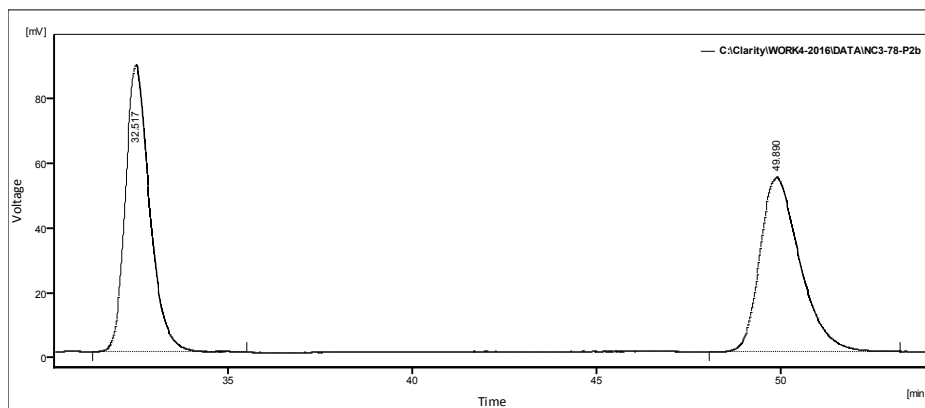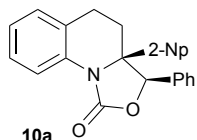

**10a** (er 95.5:4.5)

|   | R <sub>t</sub> /min | Area/ mV.s | Area/% |
|---|---------------------|------------|--------|
| 1 | 35.630              | 10875.569  | 95.4   |
| 2 | 54.043              | 529.066    | 4.6    |
|   | total               | 11404.635  | 100.0  |

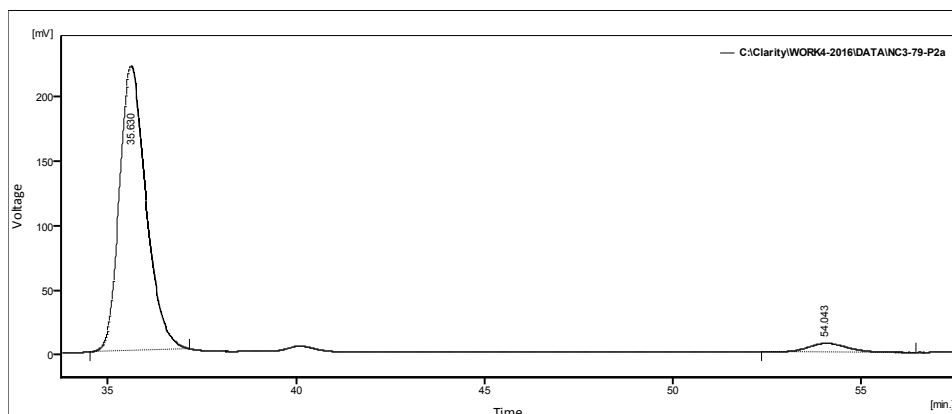

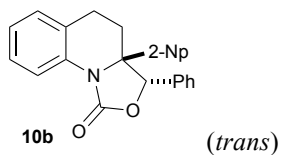

Daicel ChiralPak IA column:

|   | R <sub>t</sub> /min | Area/ mV.s | Area/% |
|---|---------------------|------------|--------|
| 1 | 37.390              | 3203.117   | 50.0   |
| 2 | 95.793              | 3199.154   | 50.0   |
|   | total               | 6402.271   | 100.0  |

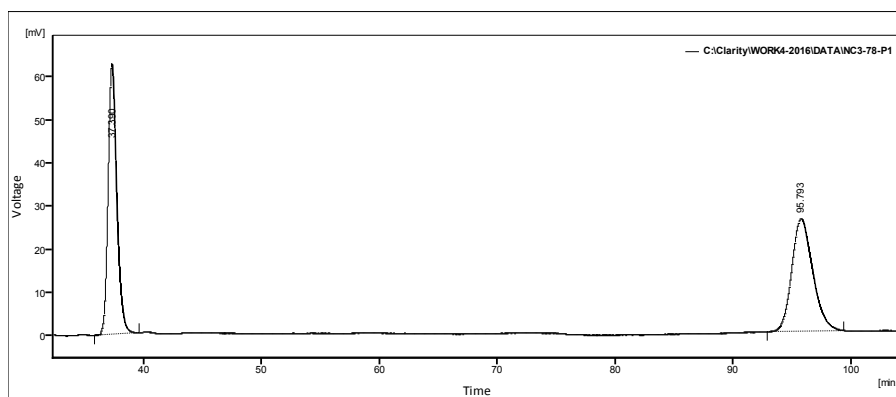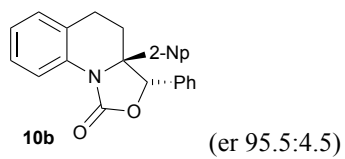

|   | R <sub>t</sub> /min | Area/ mV.s | Area/% |
|---|---------------------|------------|--------|
| 1 | 38.710              | 4307.014   | 95.6   |
| 2 | 99.580              | 196.538    | 4.4    |
|   | total               | 4503.553   | 100.0  |

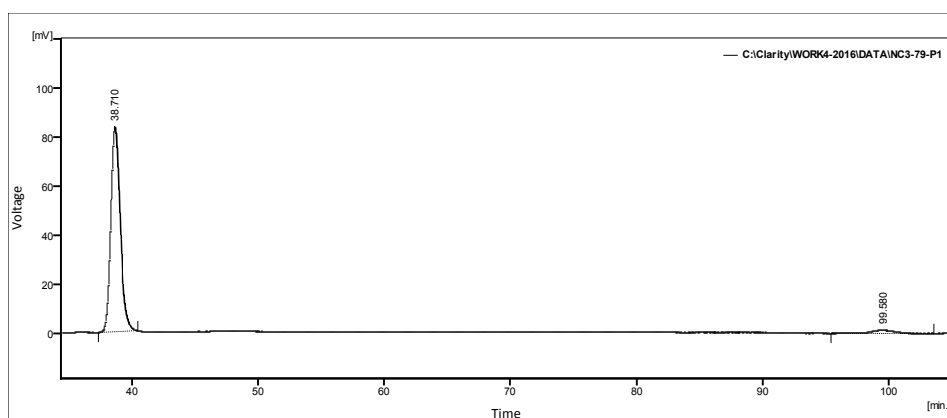

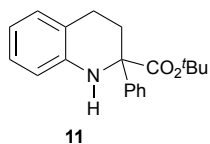

Daicel ChiralPak IA column:

|   | R <sub>t</sub> /min | Area/ mV.s | Area/% |
|---|---------------------|------------|--------|
| 1 | 10.250              | 3740.048   | 50.1   |
| 2 | 12.157              | 3726.581   | 49.9   |
|   | total               | 7466.628   | 100.0  |

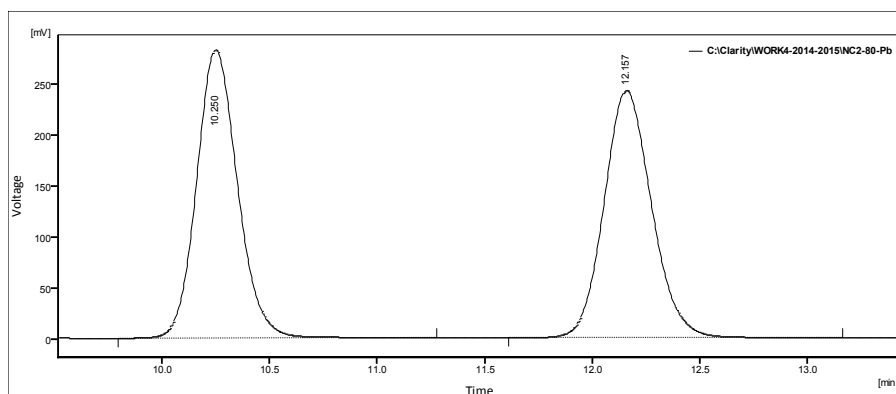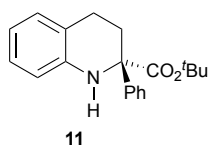

|   | R <sub>t</sub> /min | Area/ mV.s | Area/% |
|---|---------------------|------------|--------|
| 1 | 10.237              | 592.441    | 1.7    |
| 2 | 11.833              | 34053.421  | 98.3   |
|   | total               | 34645.862  | 100.0  |

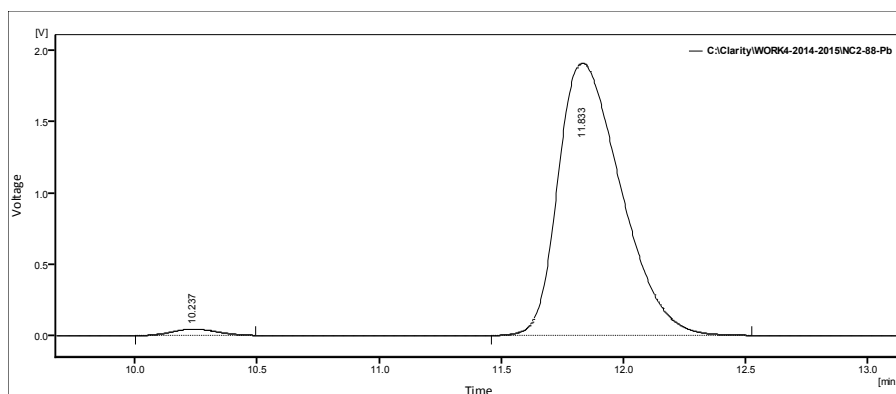



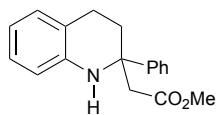

12

Daicel ChiralCel OJ column:

|   | R <sub>t</sub> /min | Area/ mV.s | Area/% |
|---|---------------------|------------|--------|
| 1 | 24.810              | 8661.403   | 50.0   |
| 2 | 36.357              | 8669.377   | 50.0   |
|   | total               | 17330.780  | 100.0  |

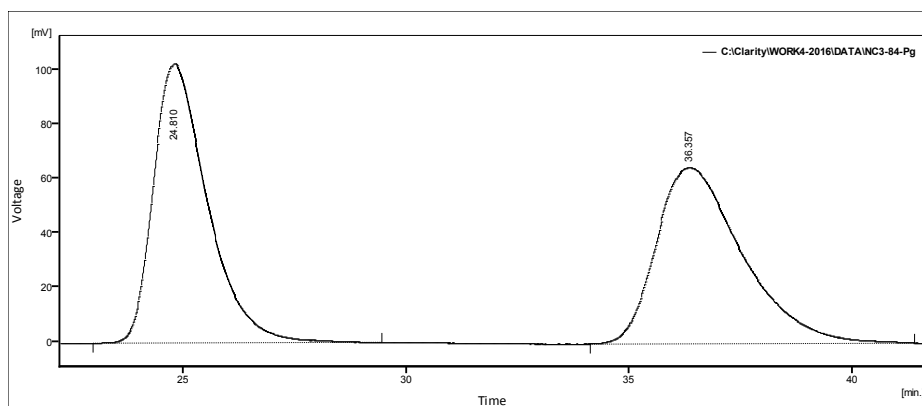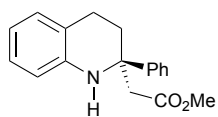

12

(er 88:12)

|   | R <sub>t</sub> /min | Area/ mV.s | Area/% |
|---|---------------------|------------|--------|
| 1 | 24.587              | 11195.814  | 88.3   |
| 2 | 36.810              | 1486.358   | 11.7   |
|   | total               | 12682.171  | 100.0  |

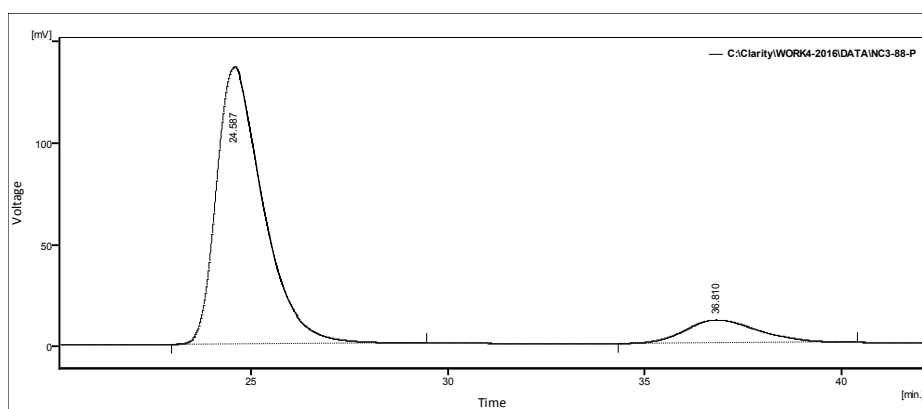

9.  $^1\text{H}$  and  $^{13}\text{C}$  NMR spectra

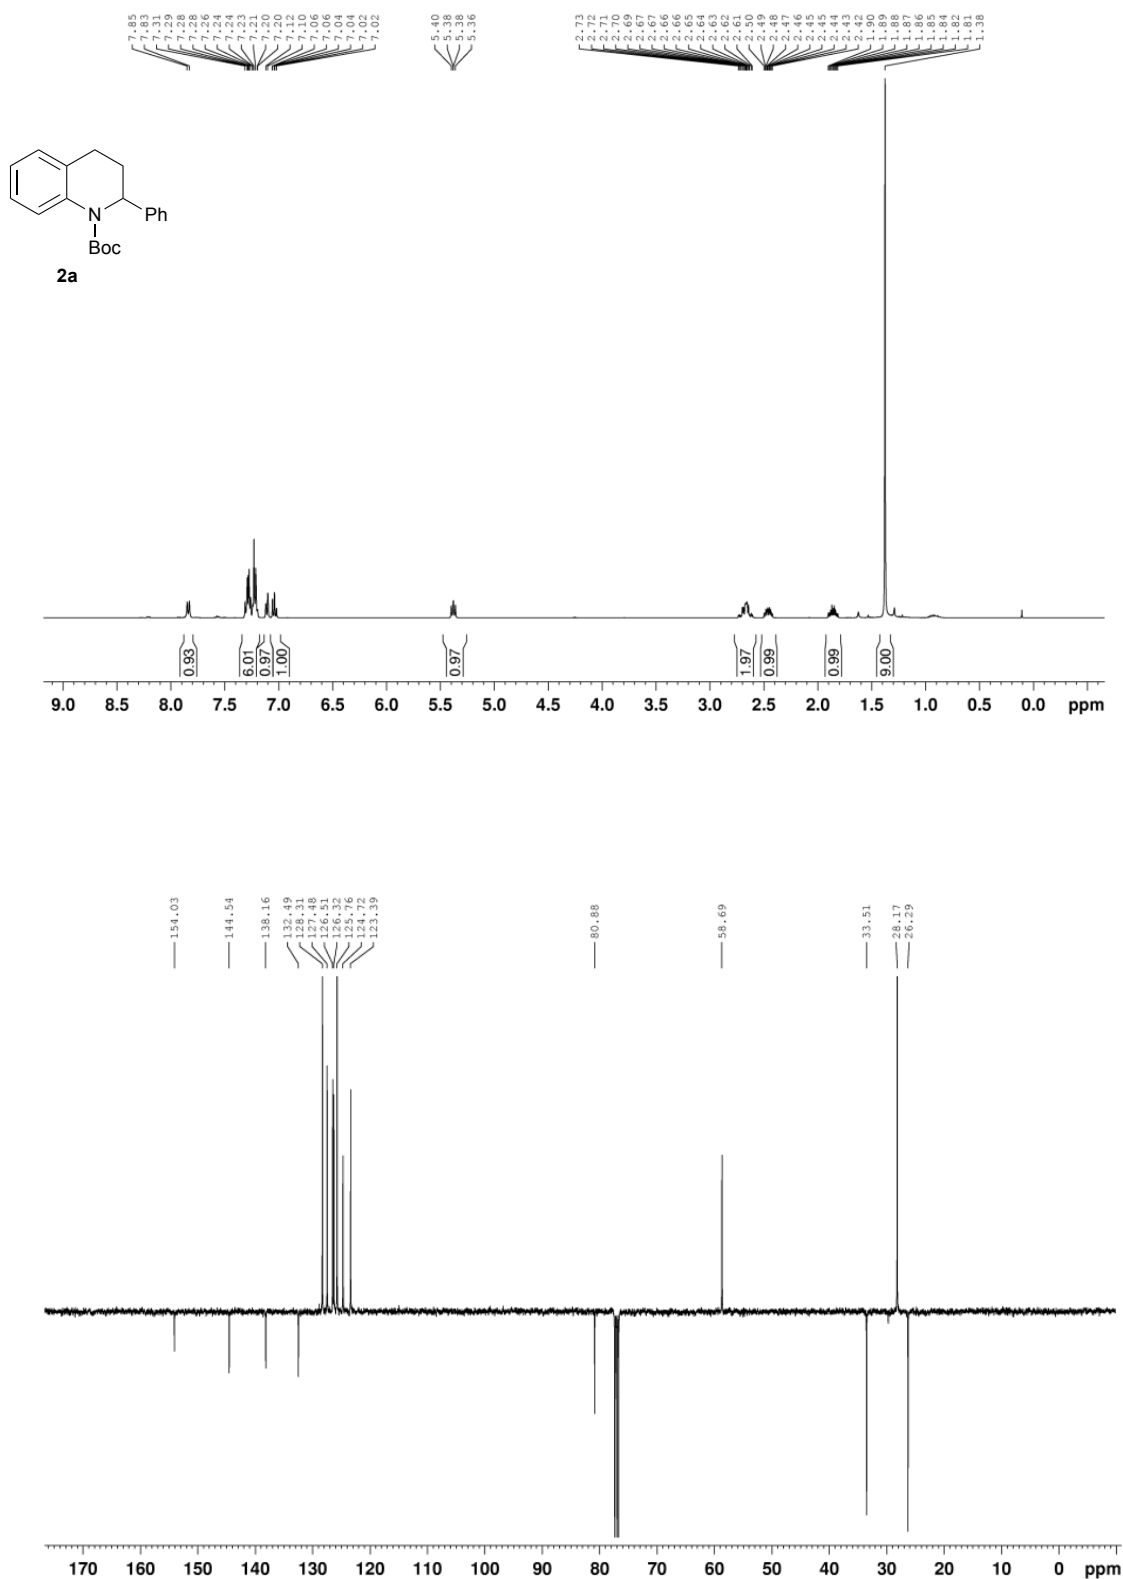

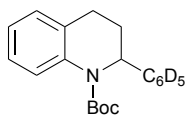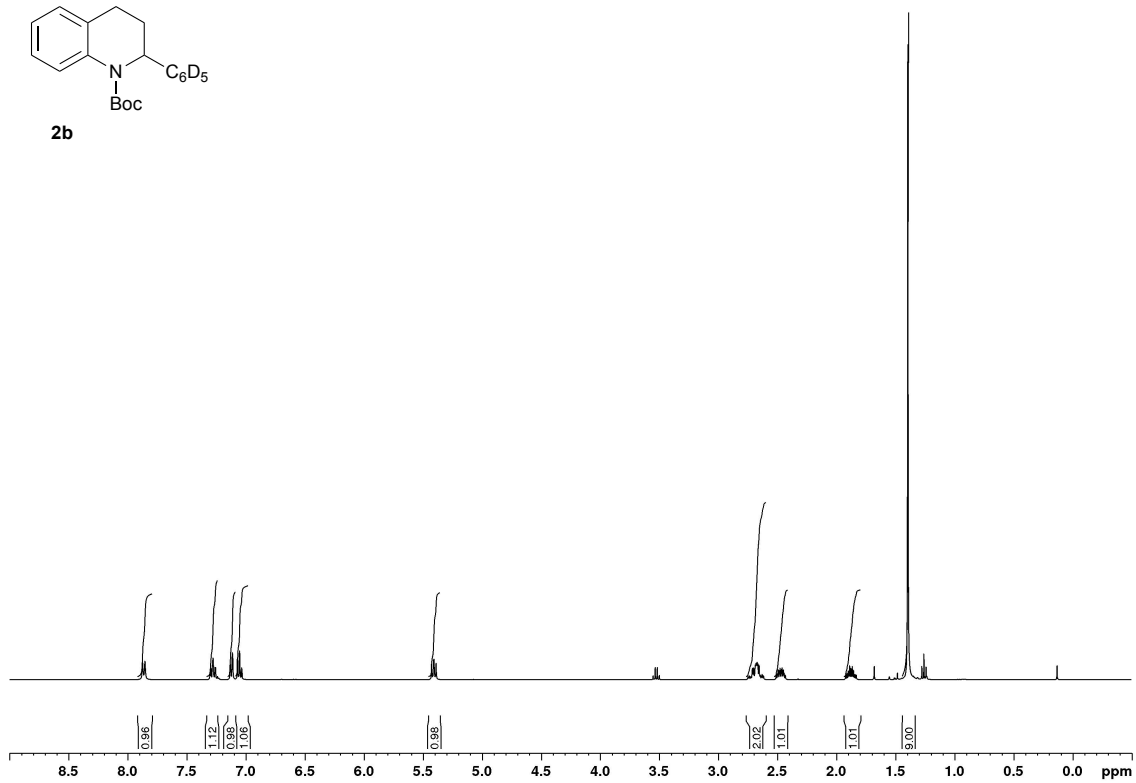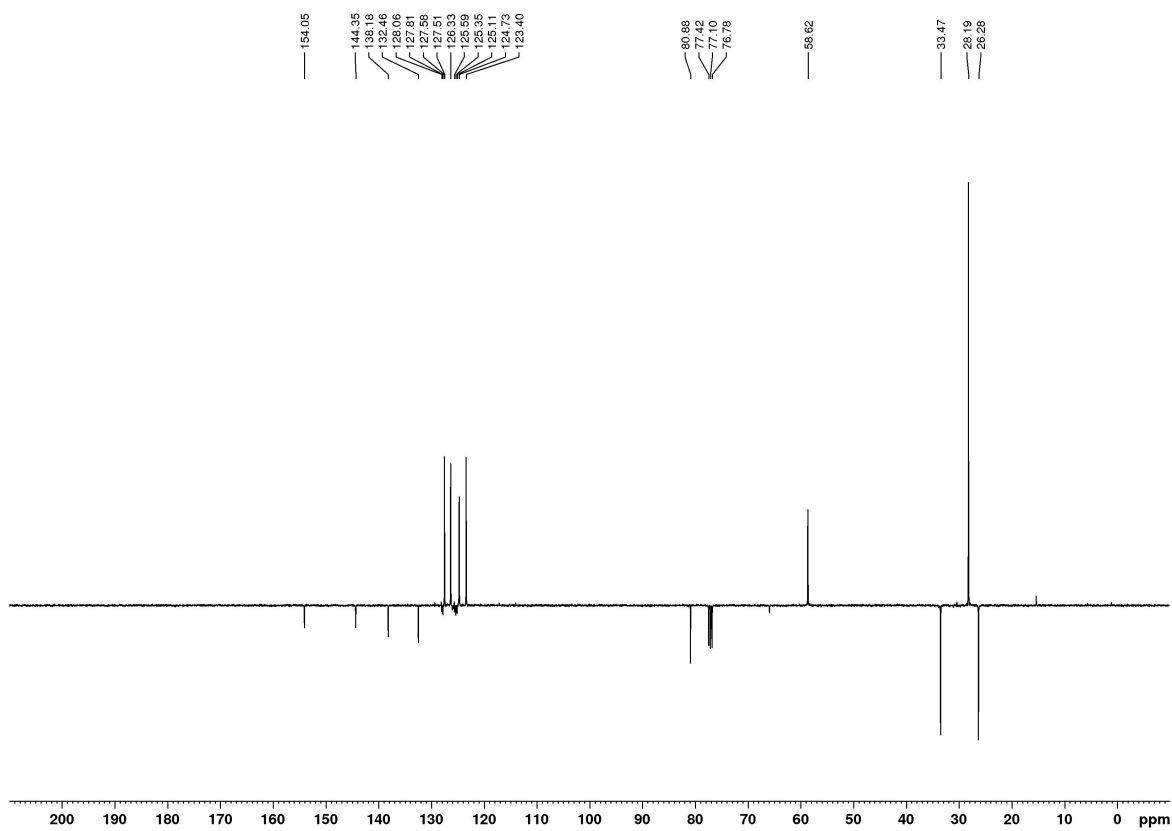

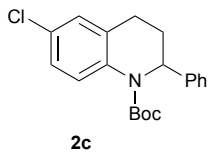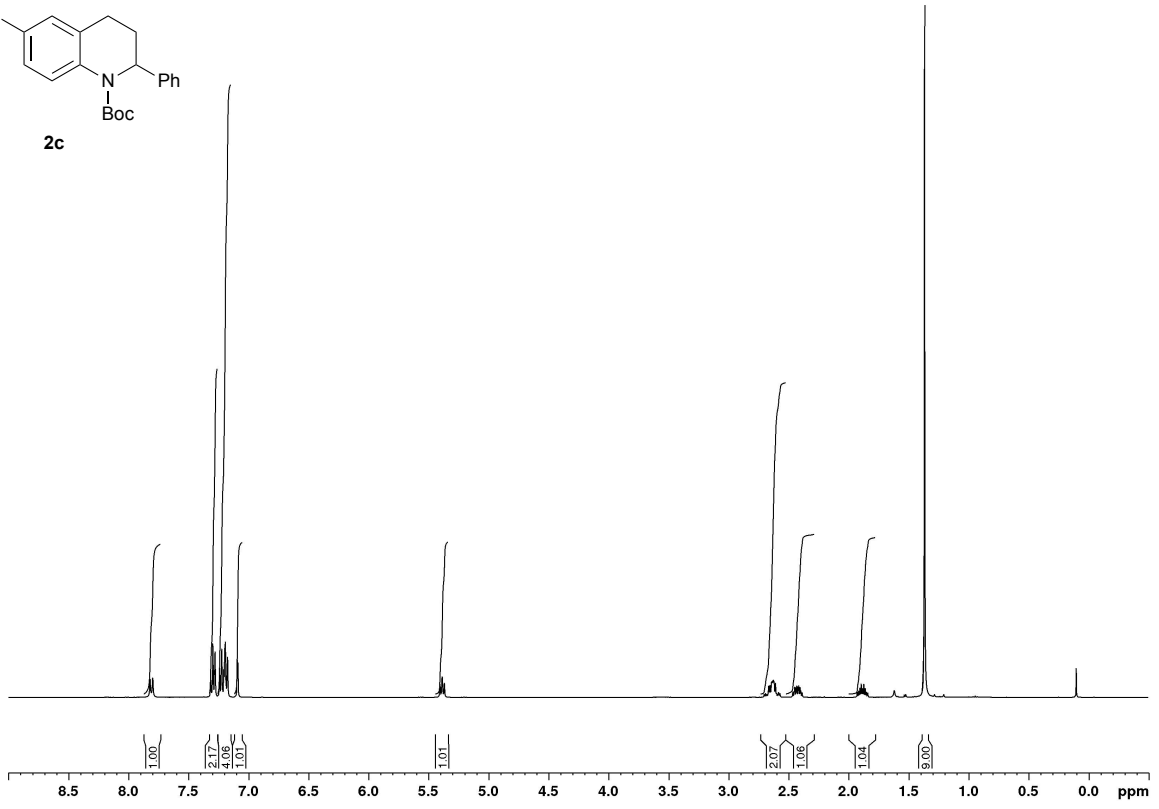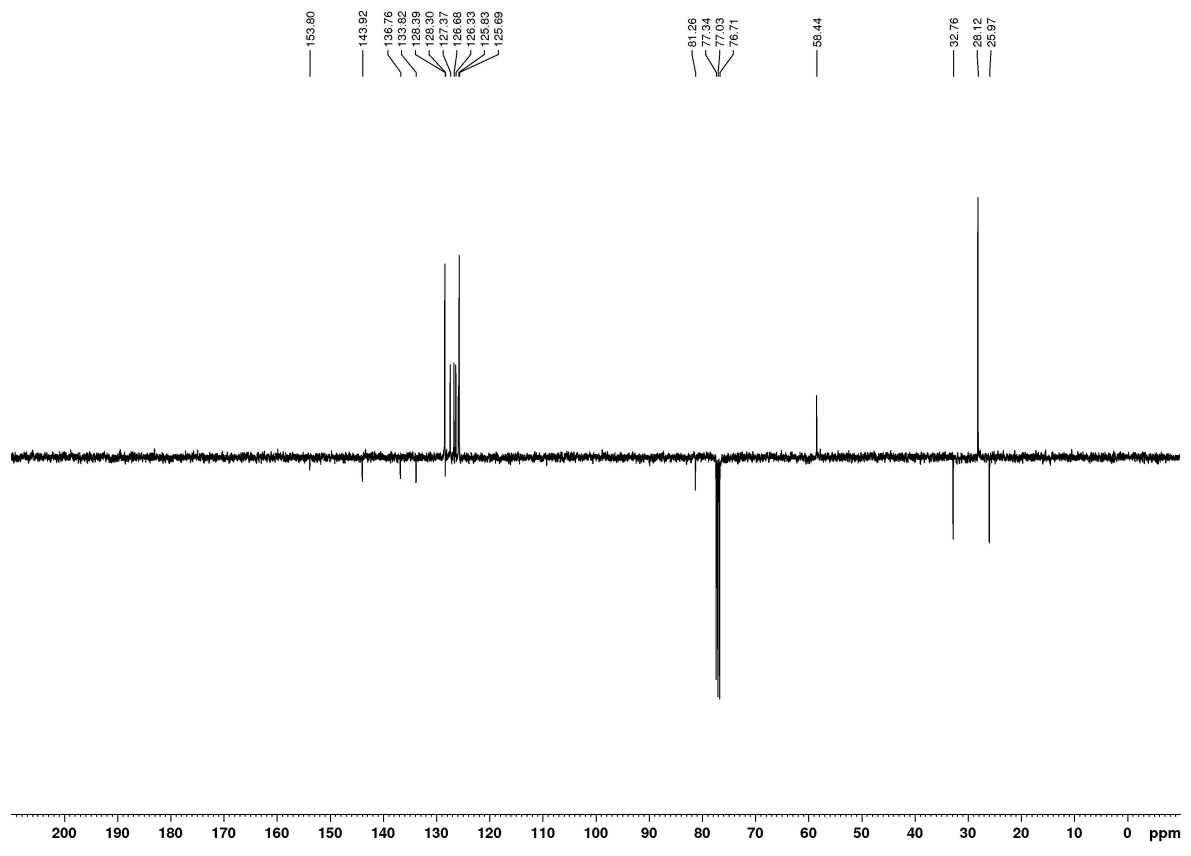

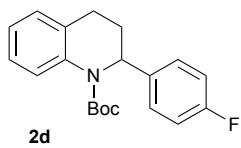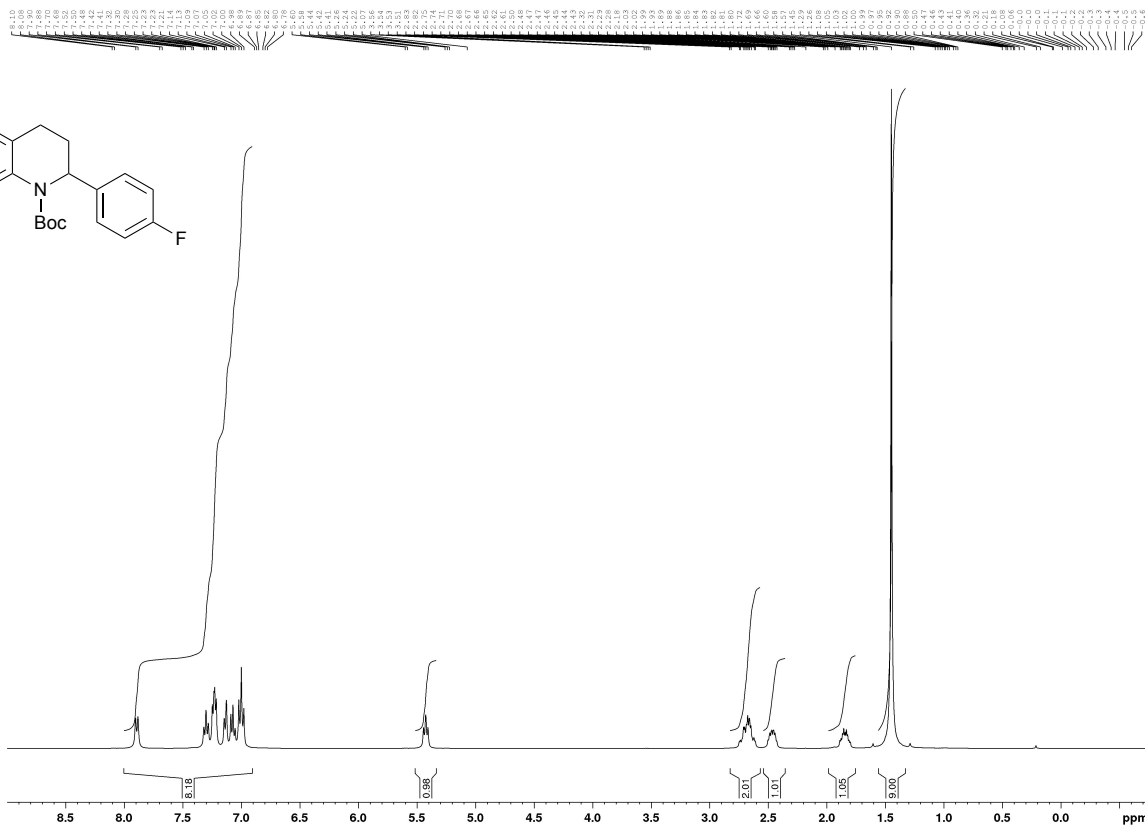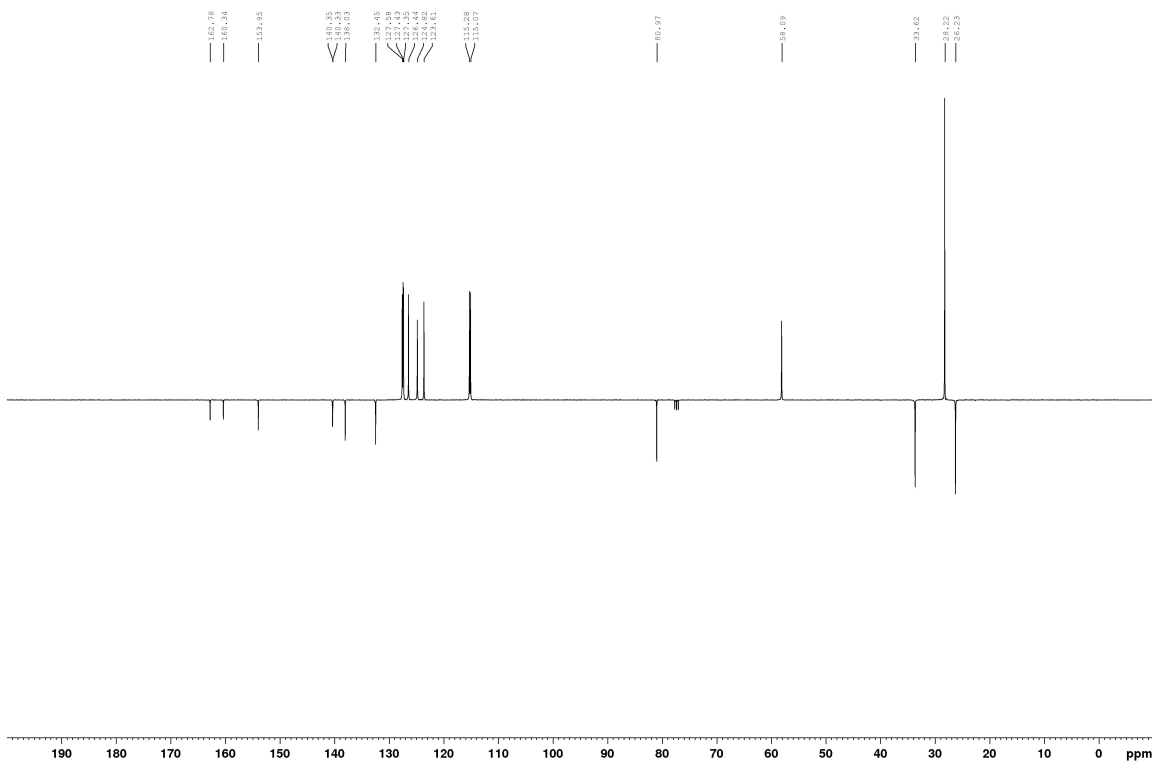

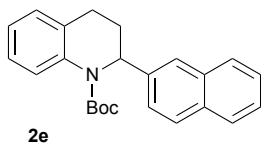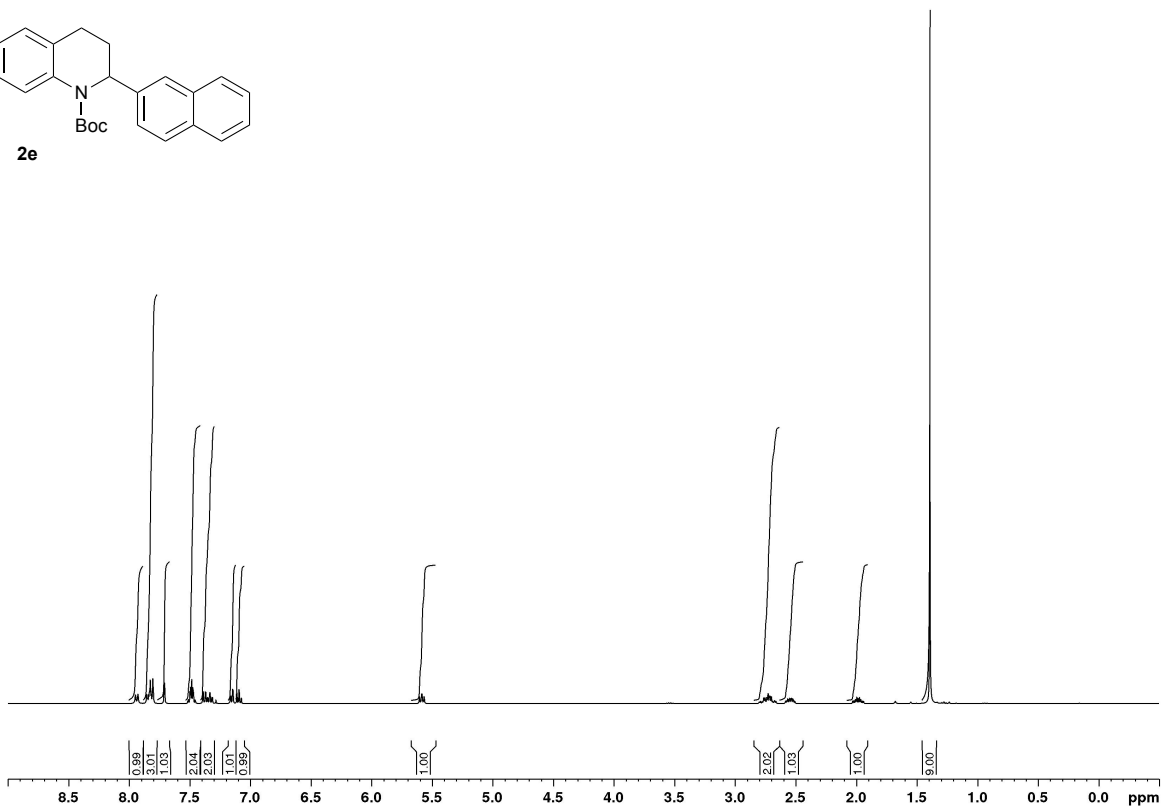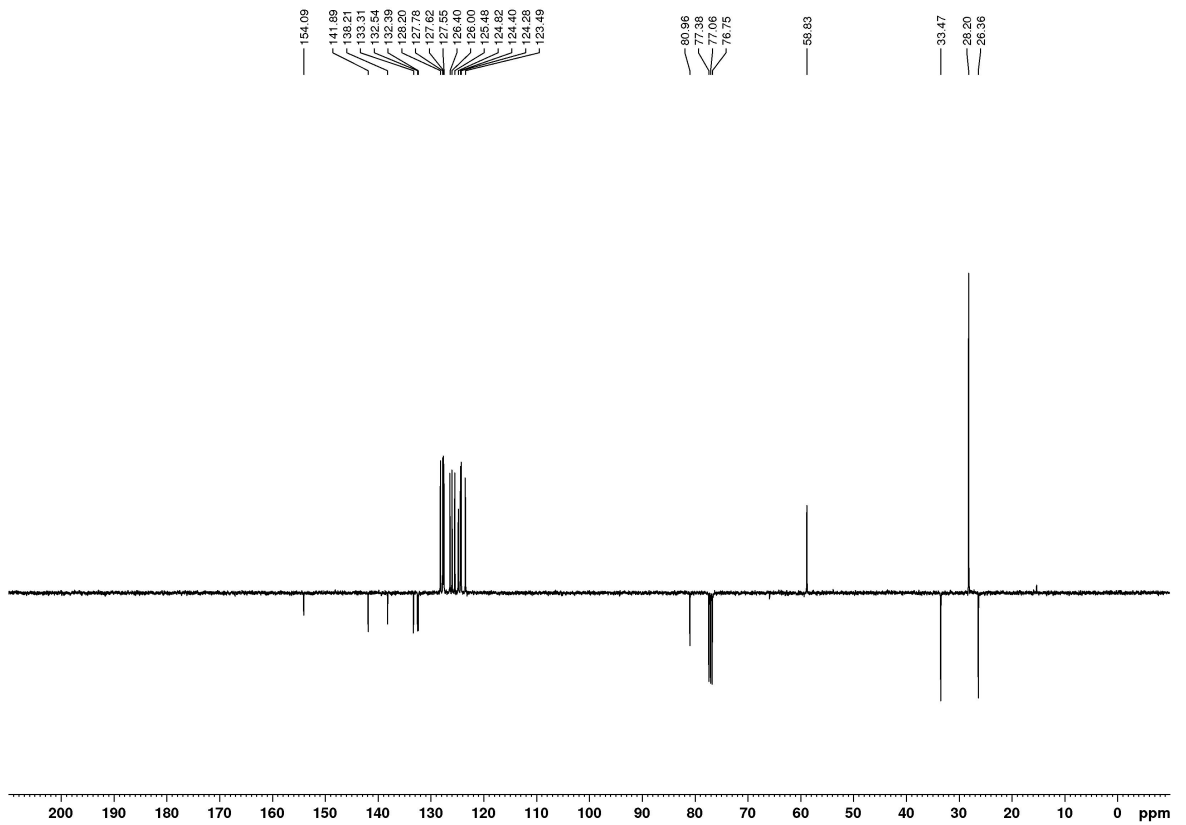

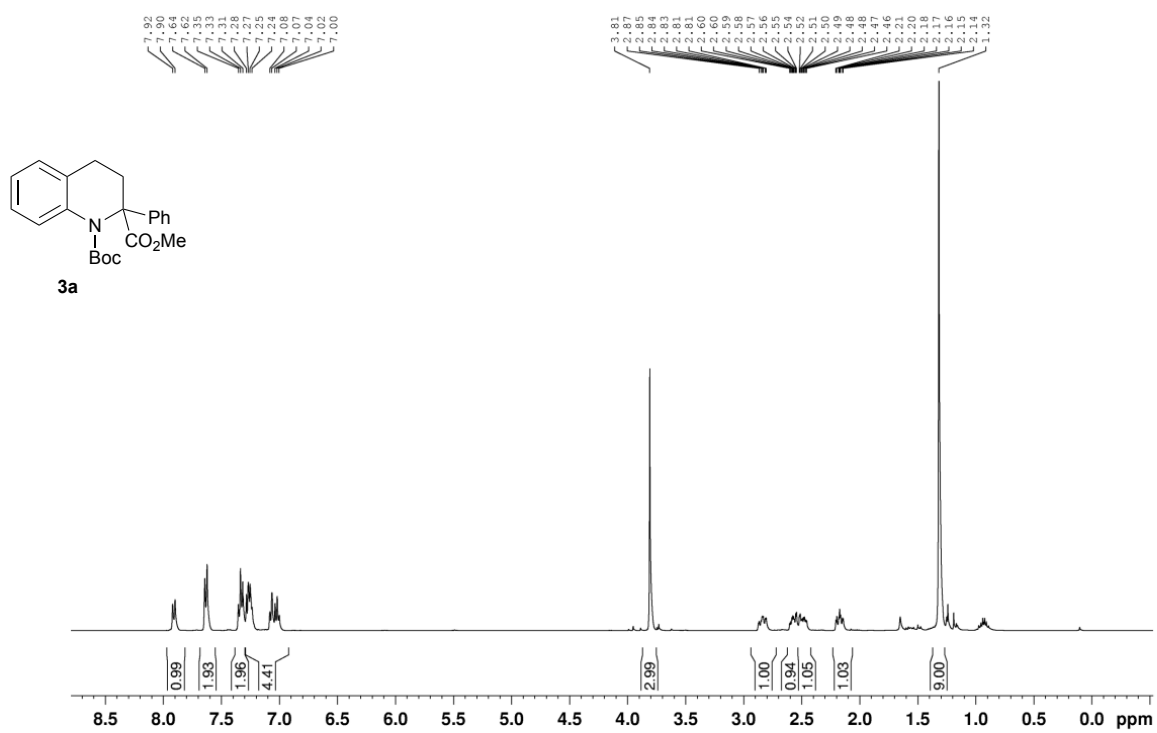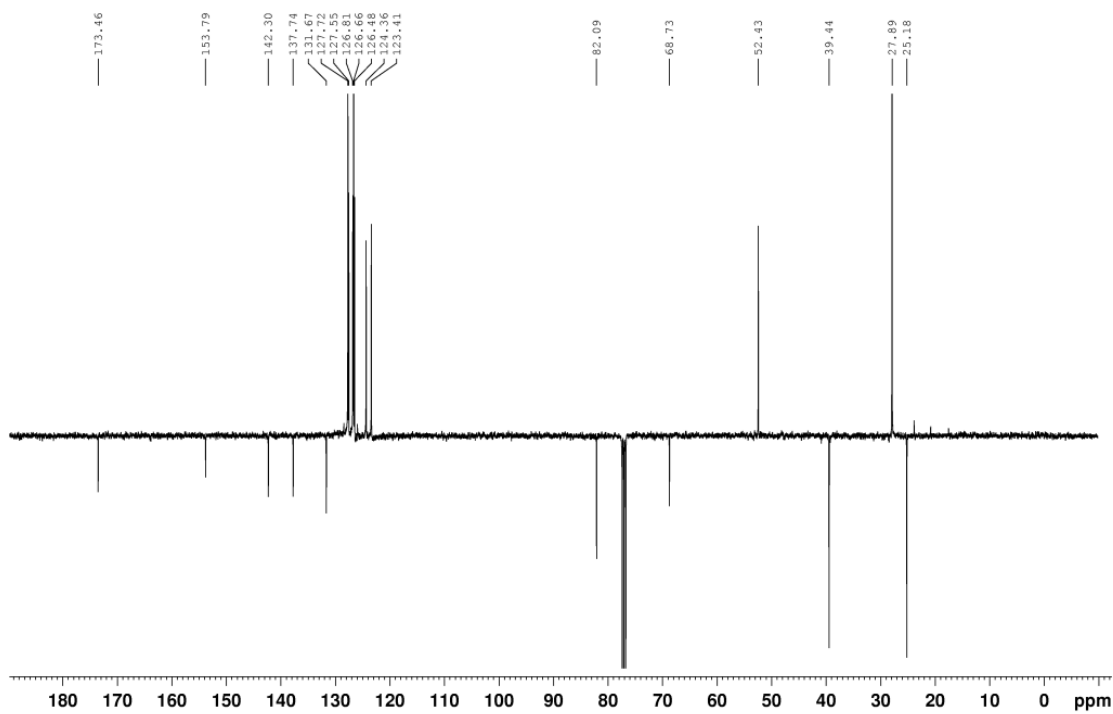

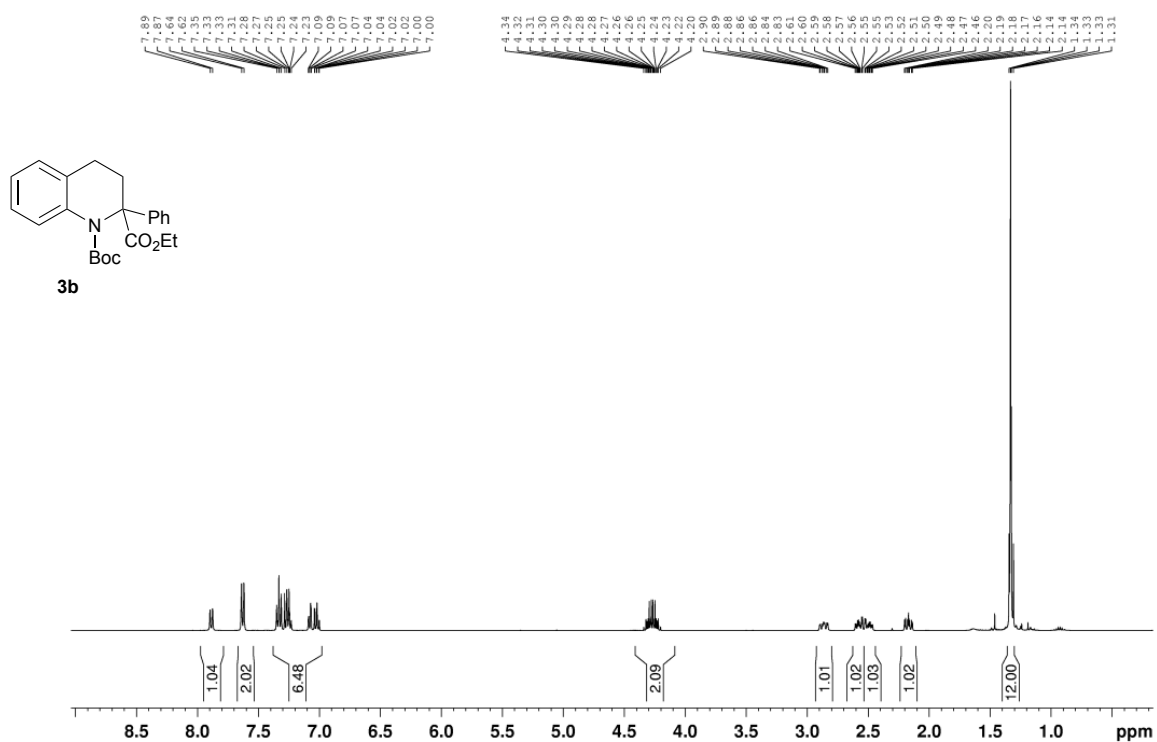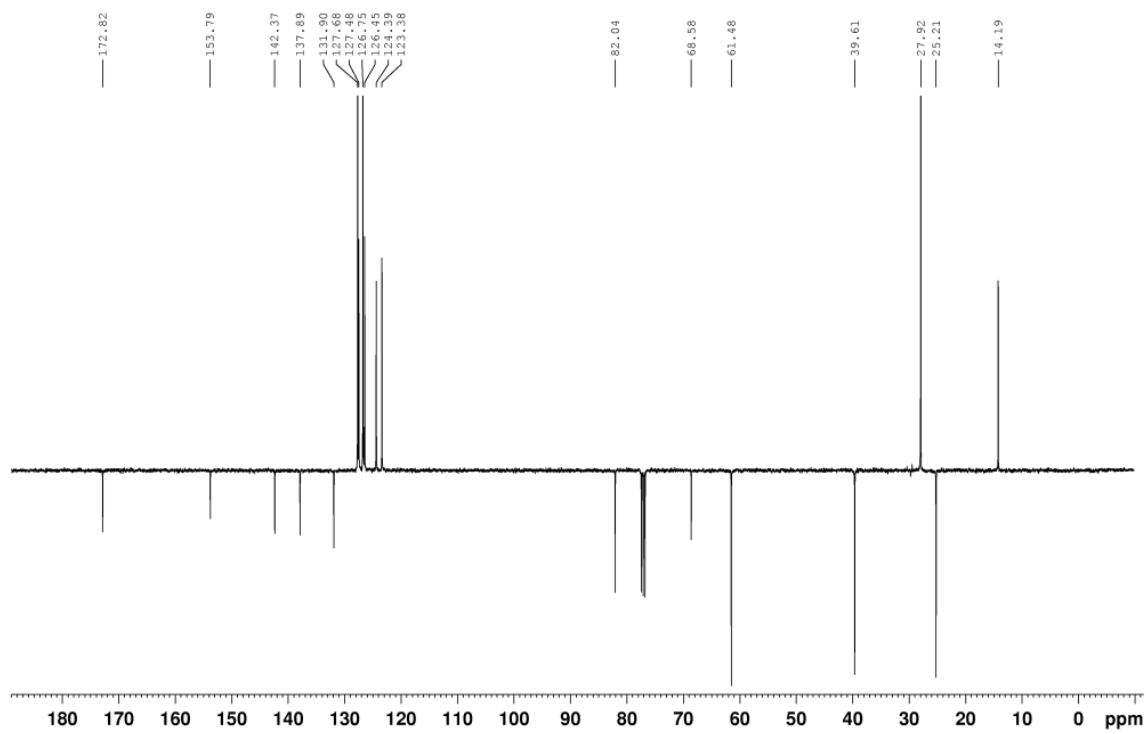



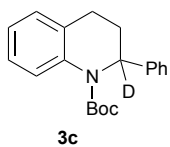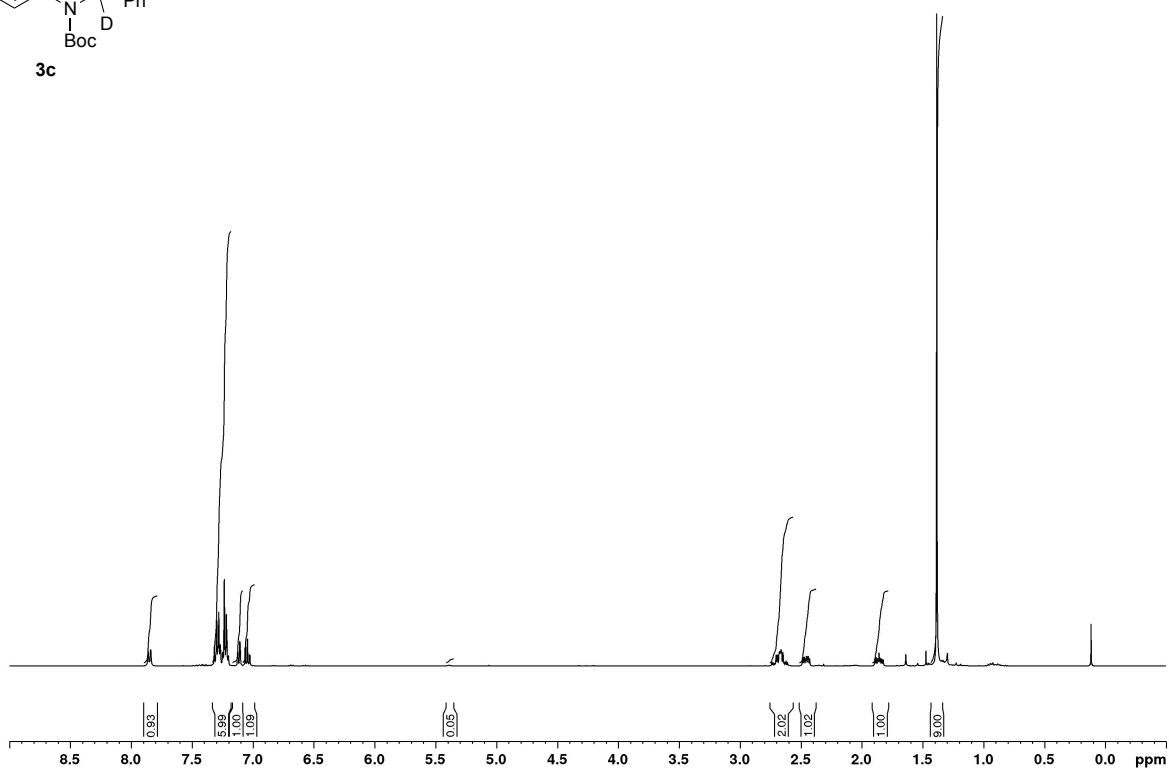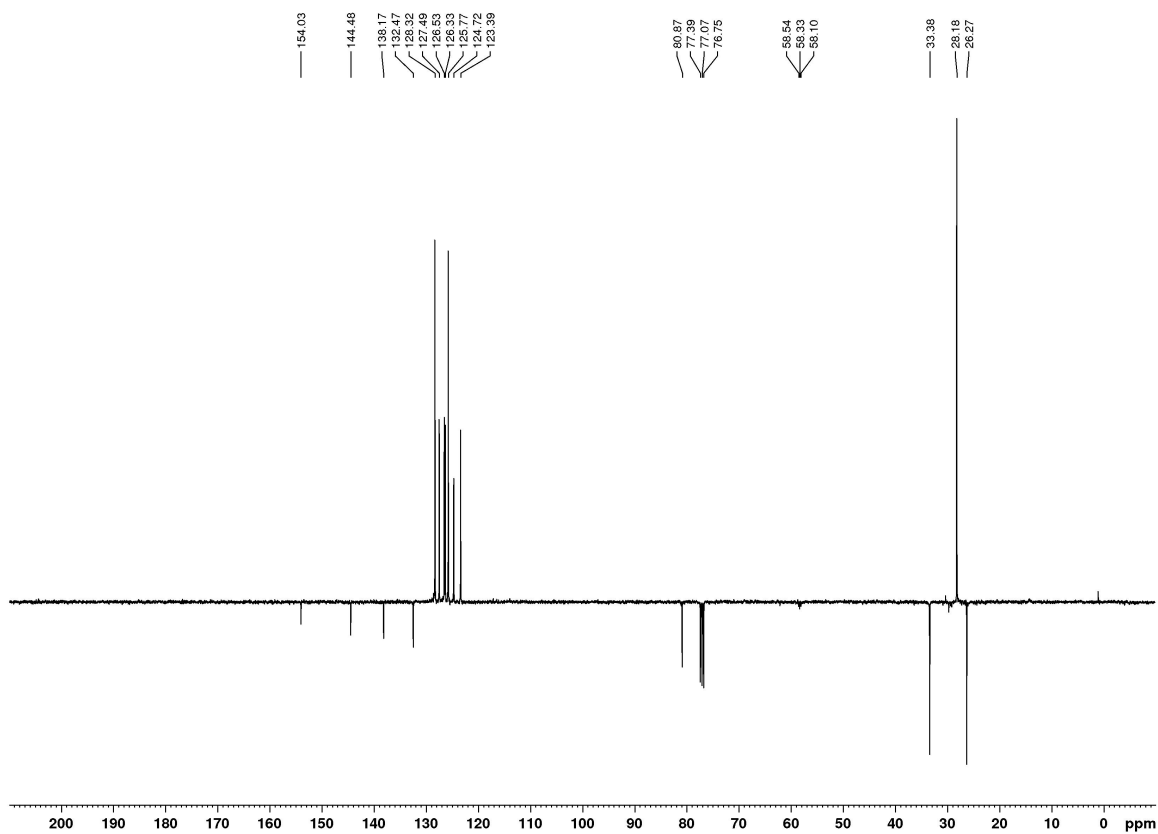

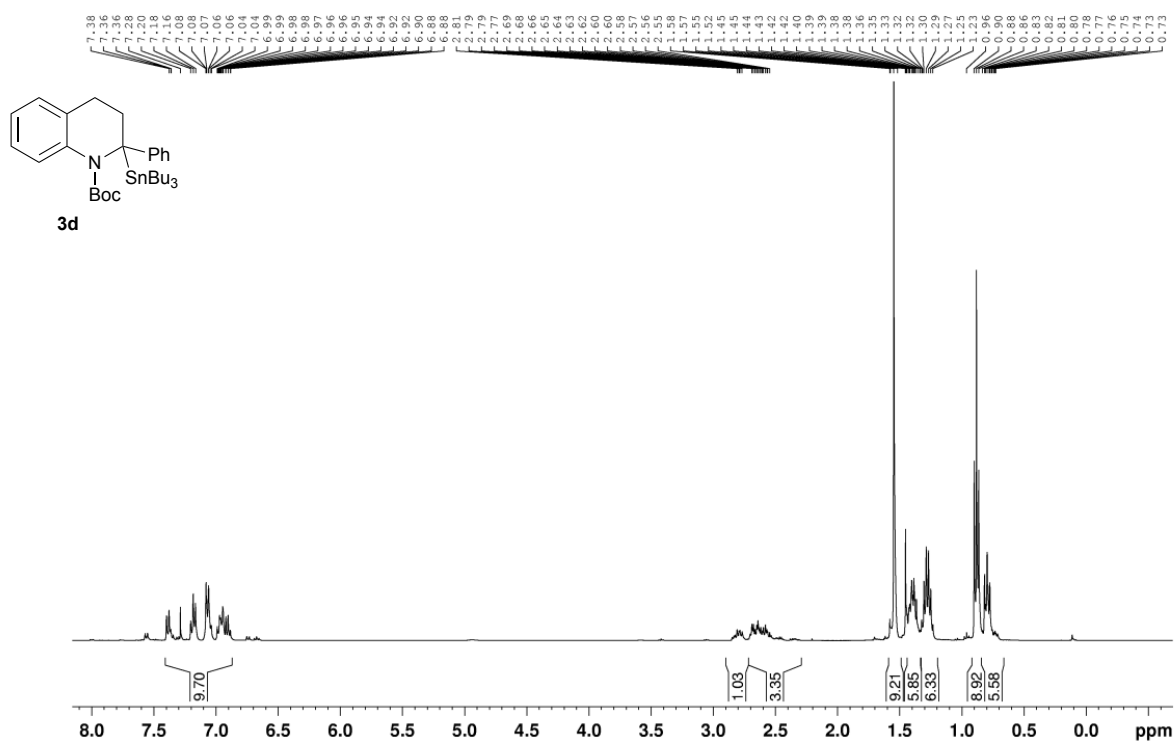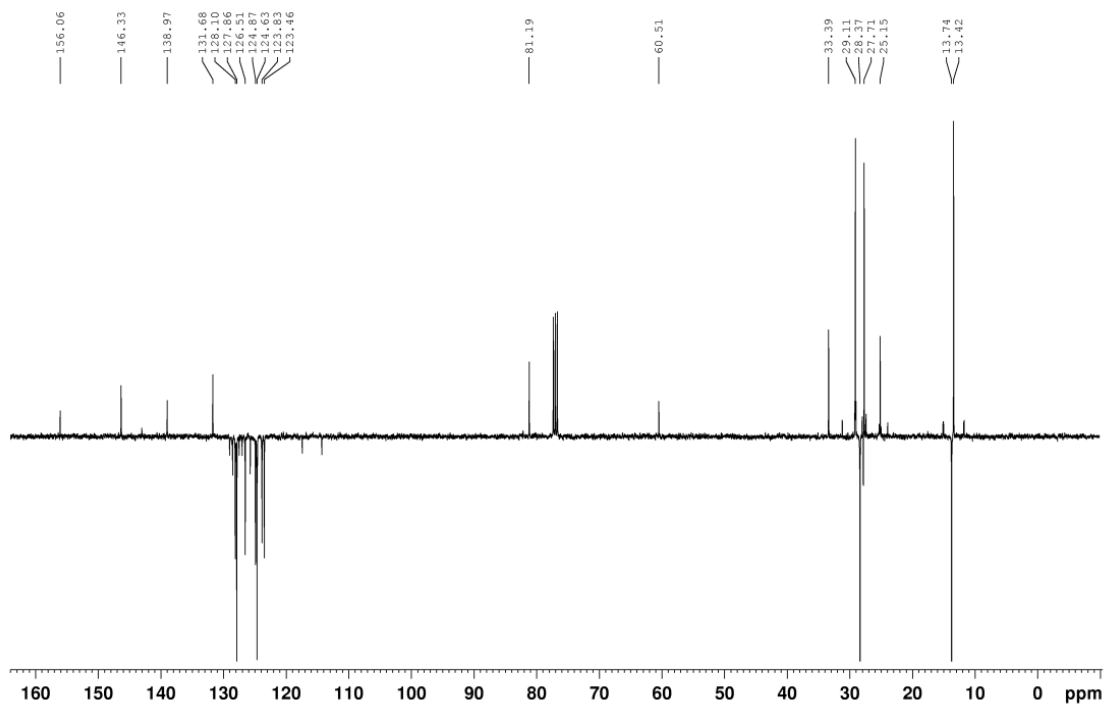

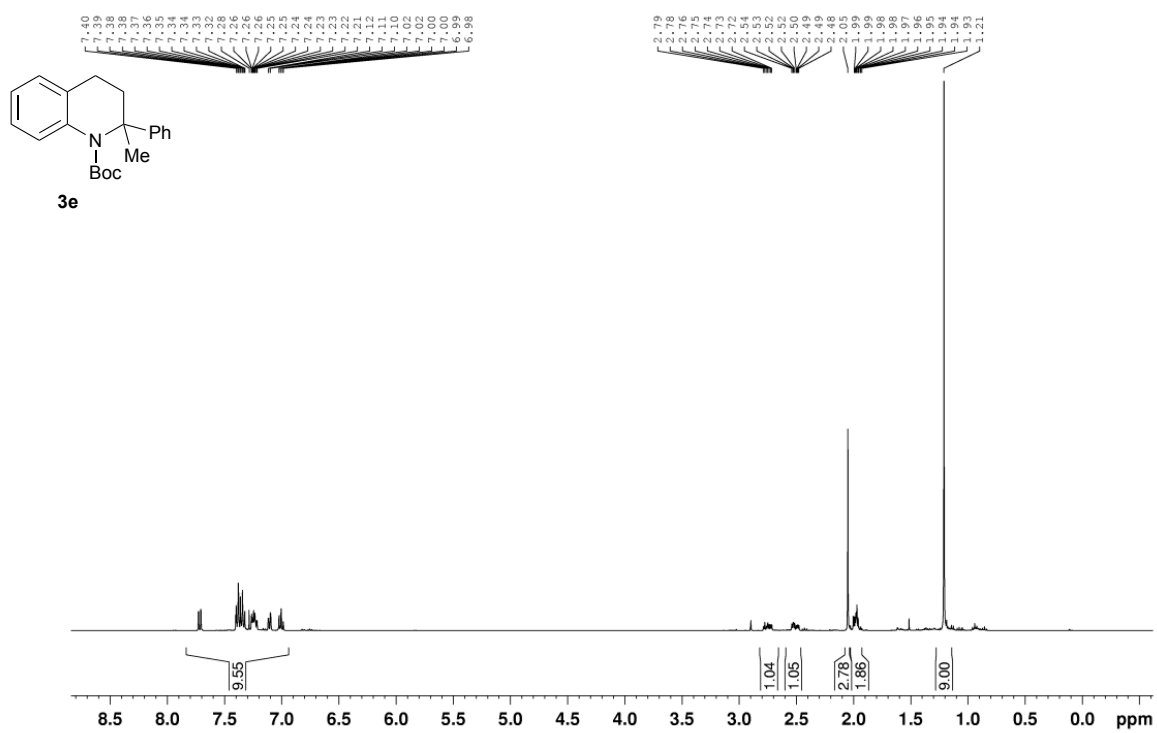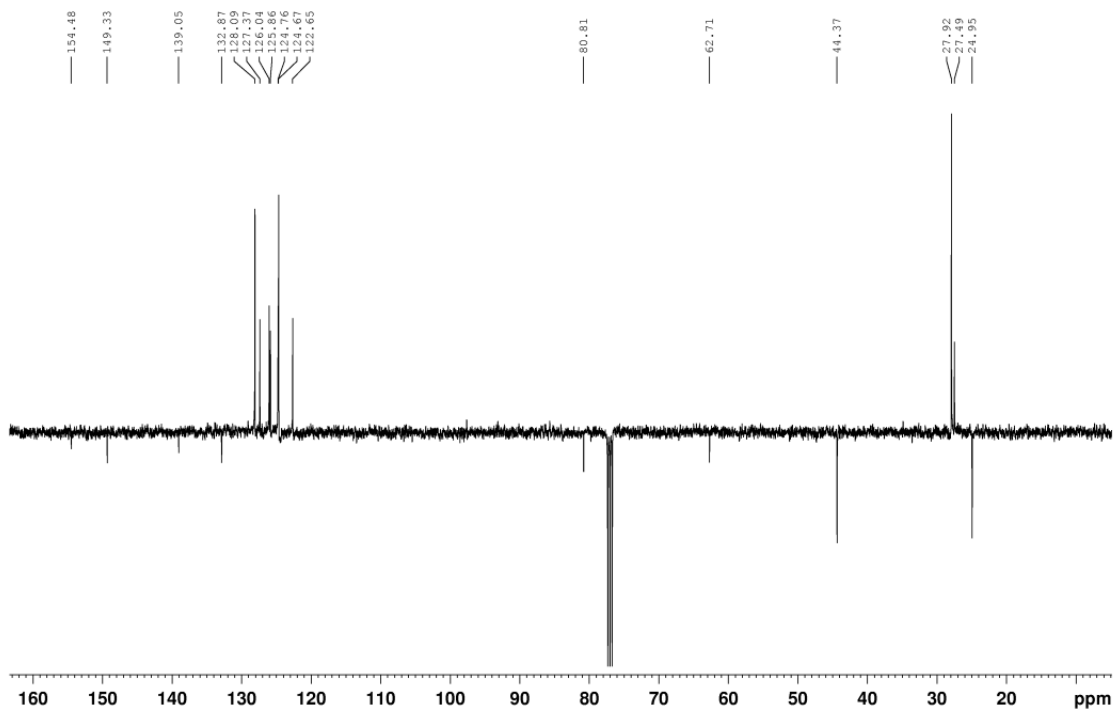

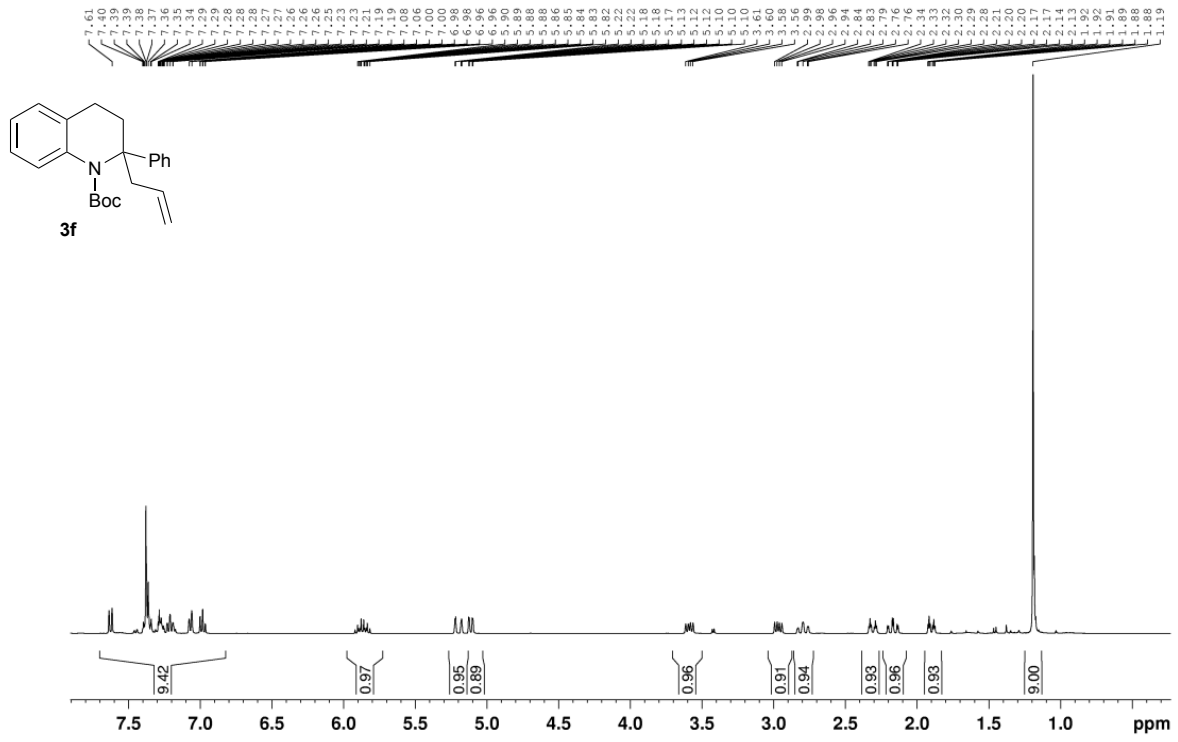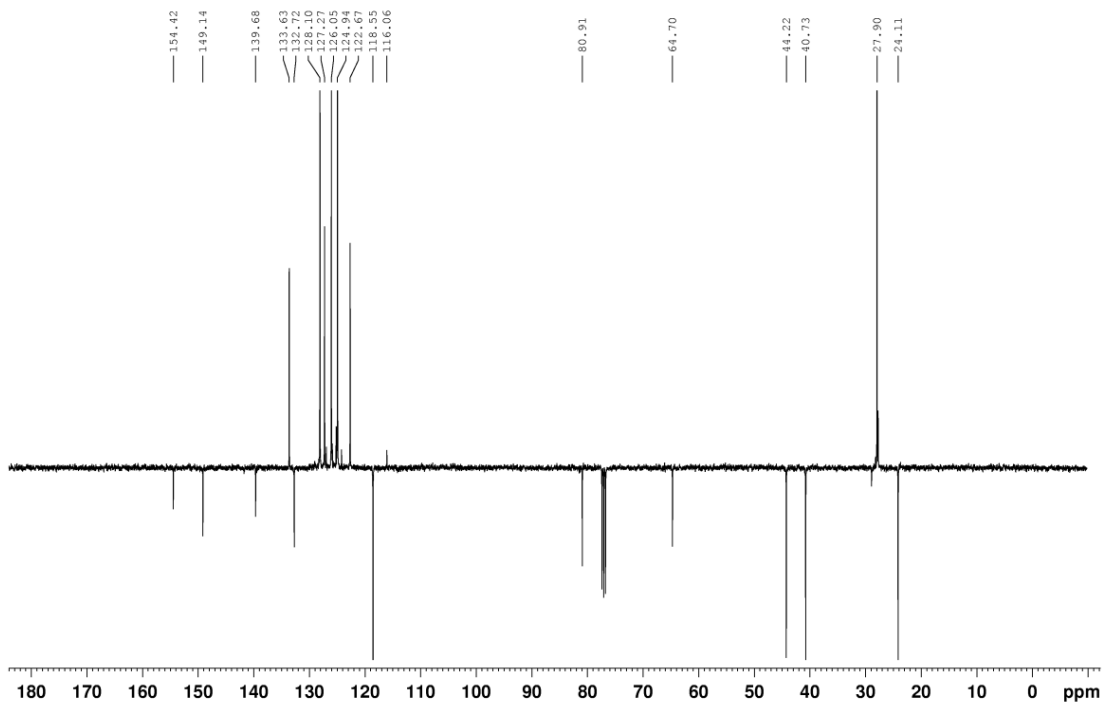

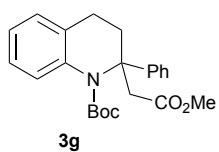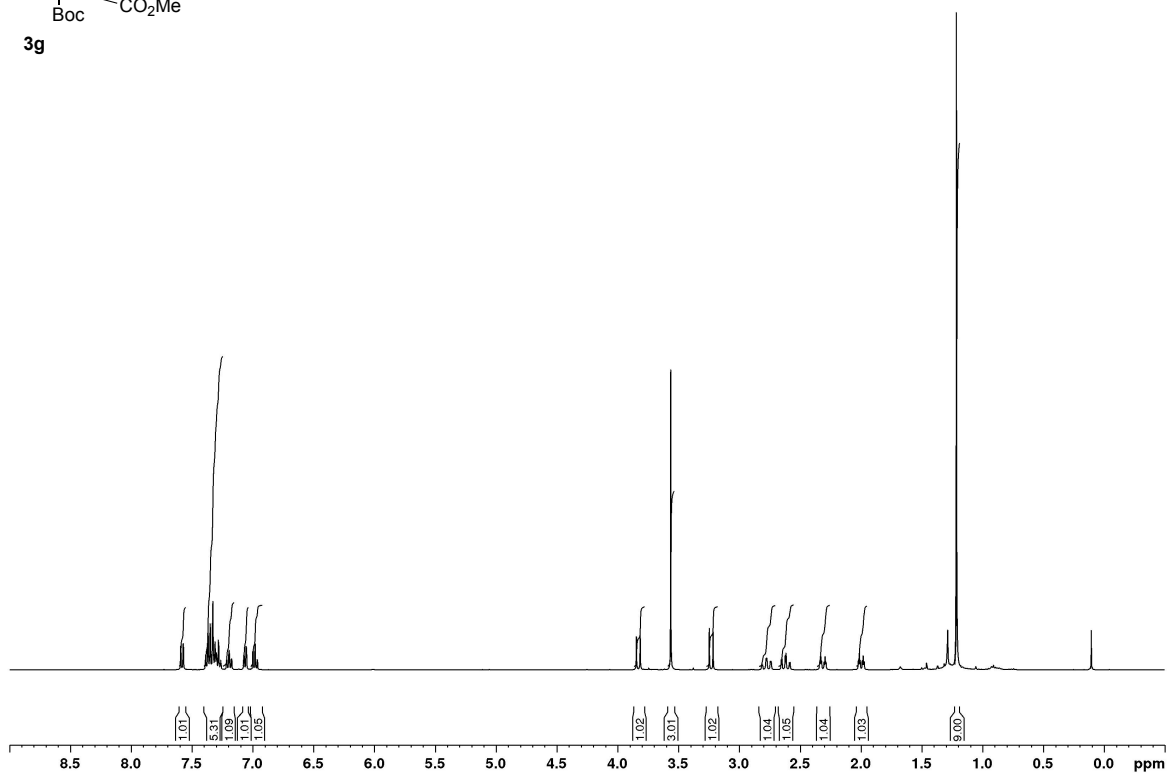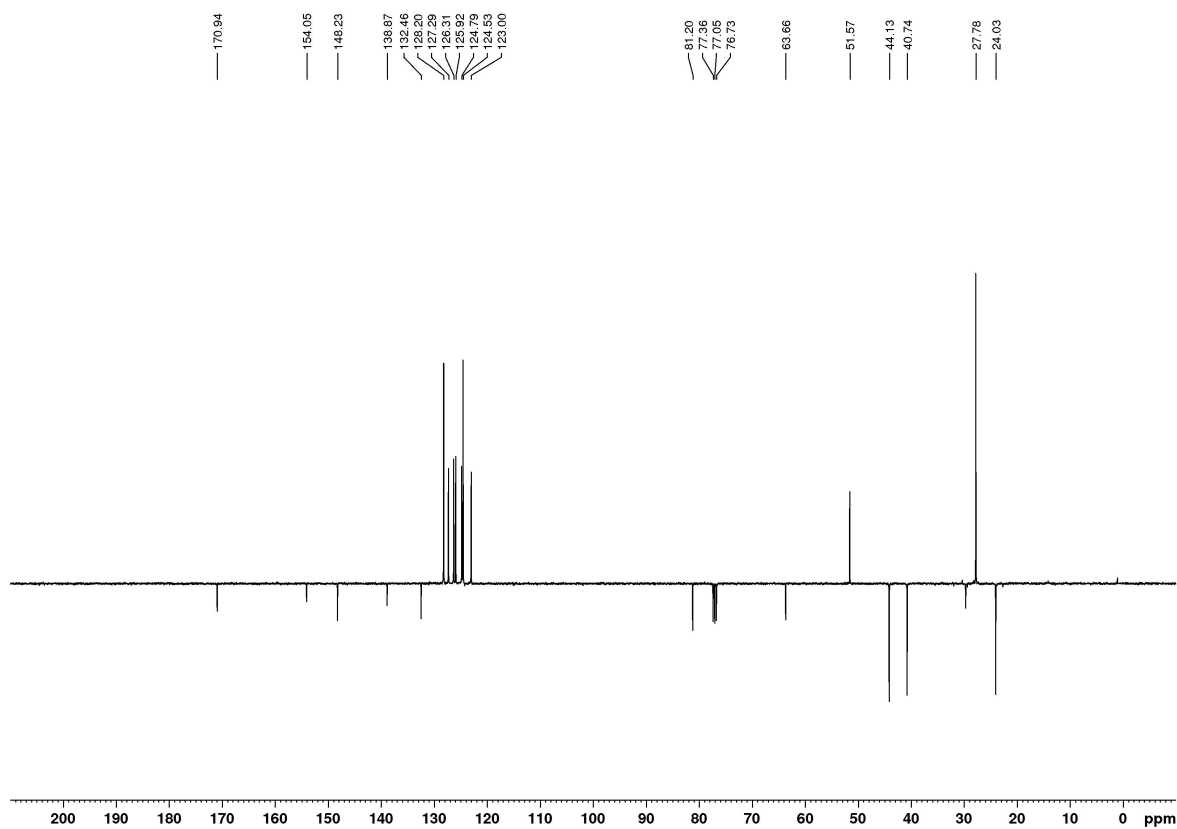

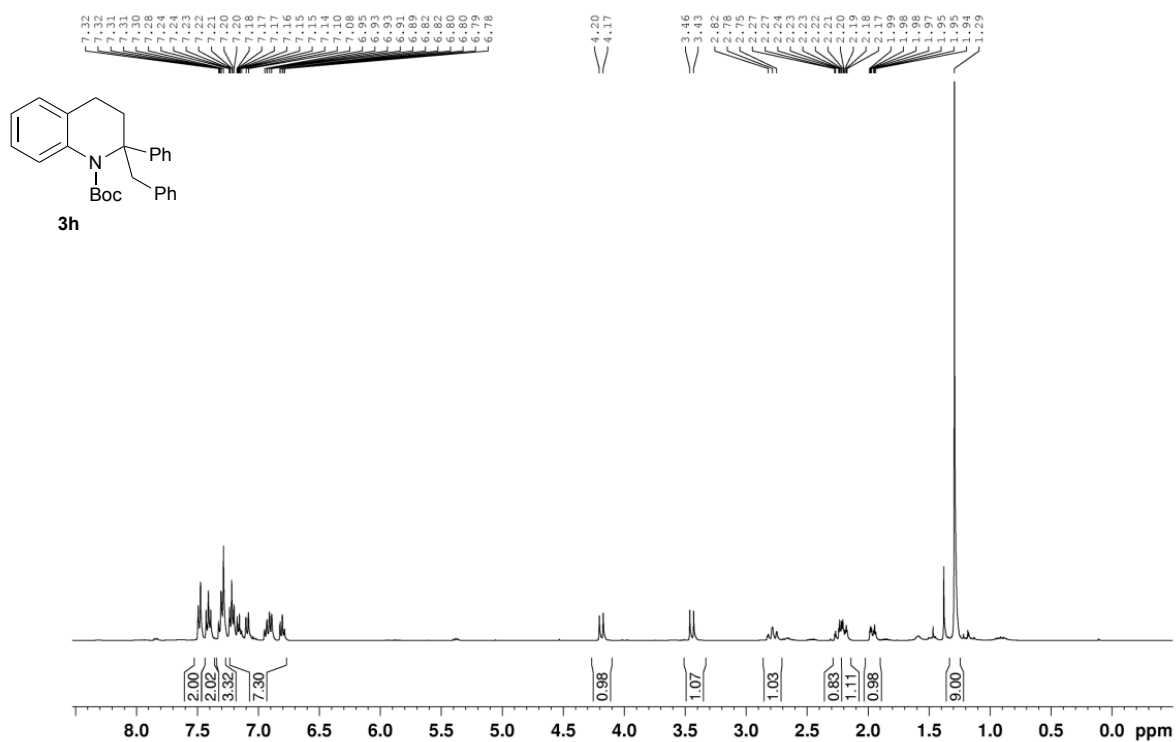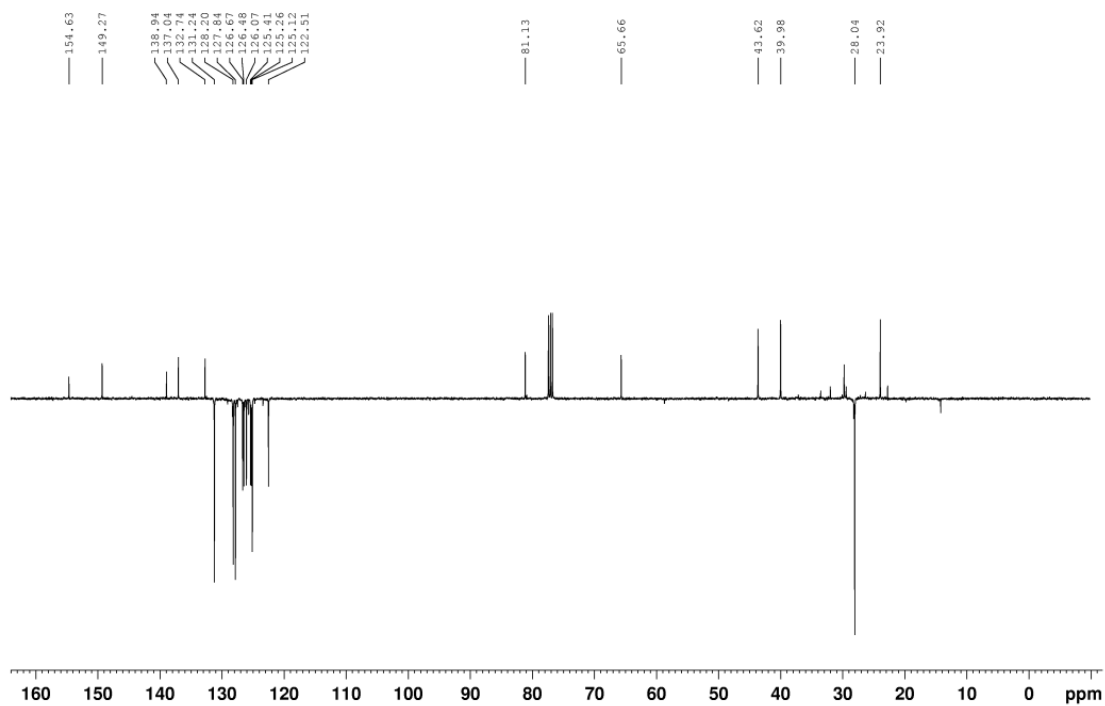

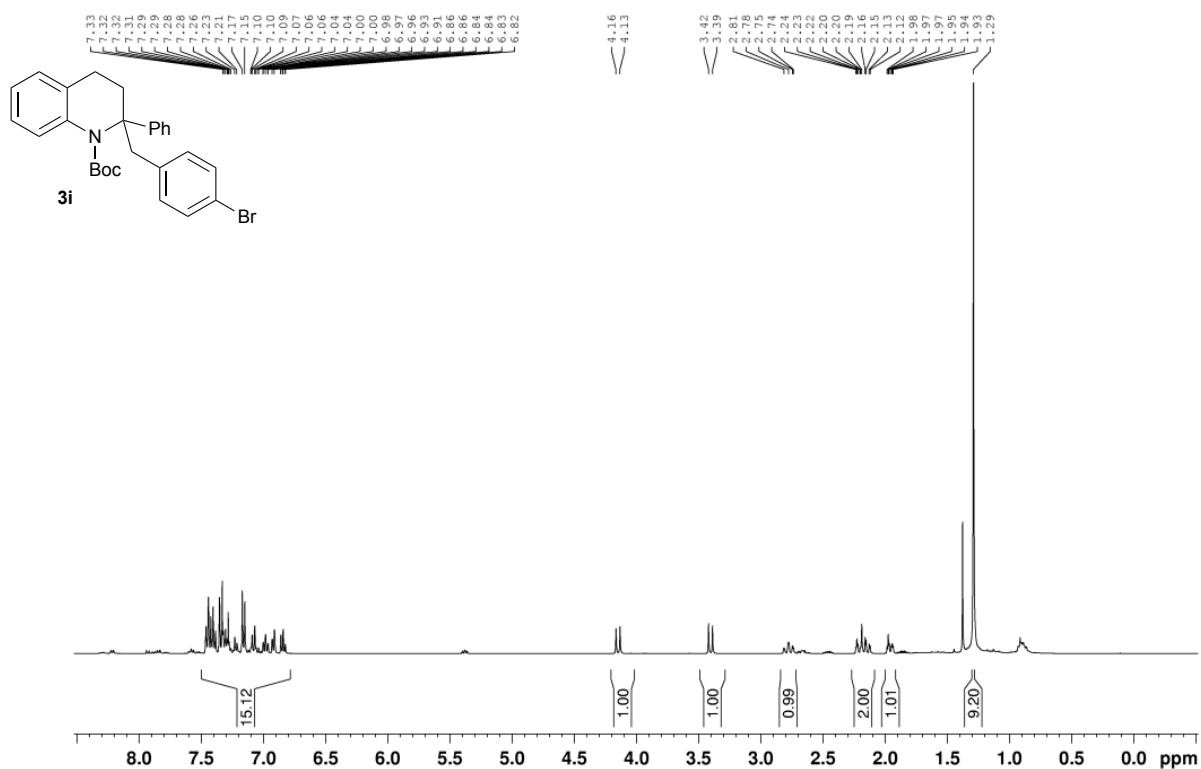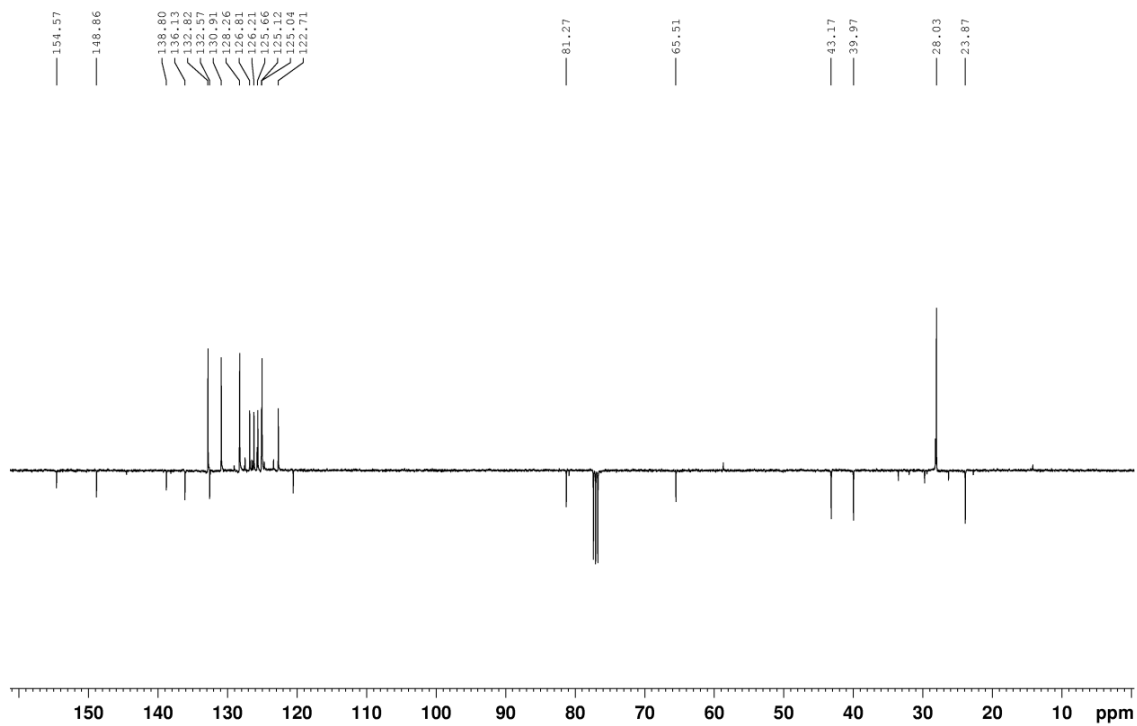

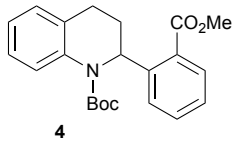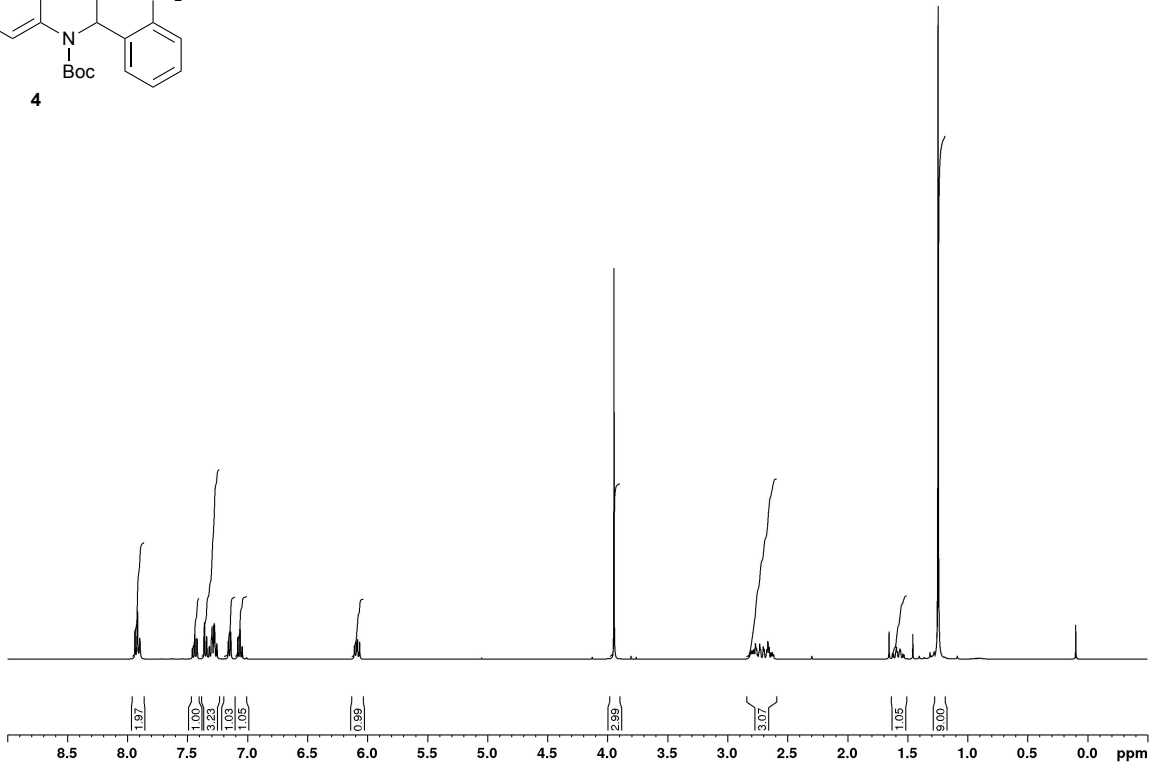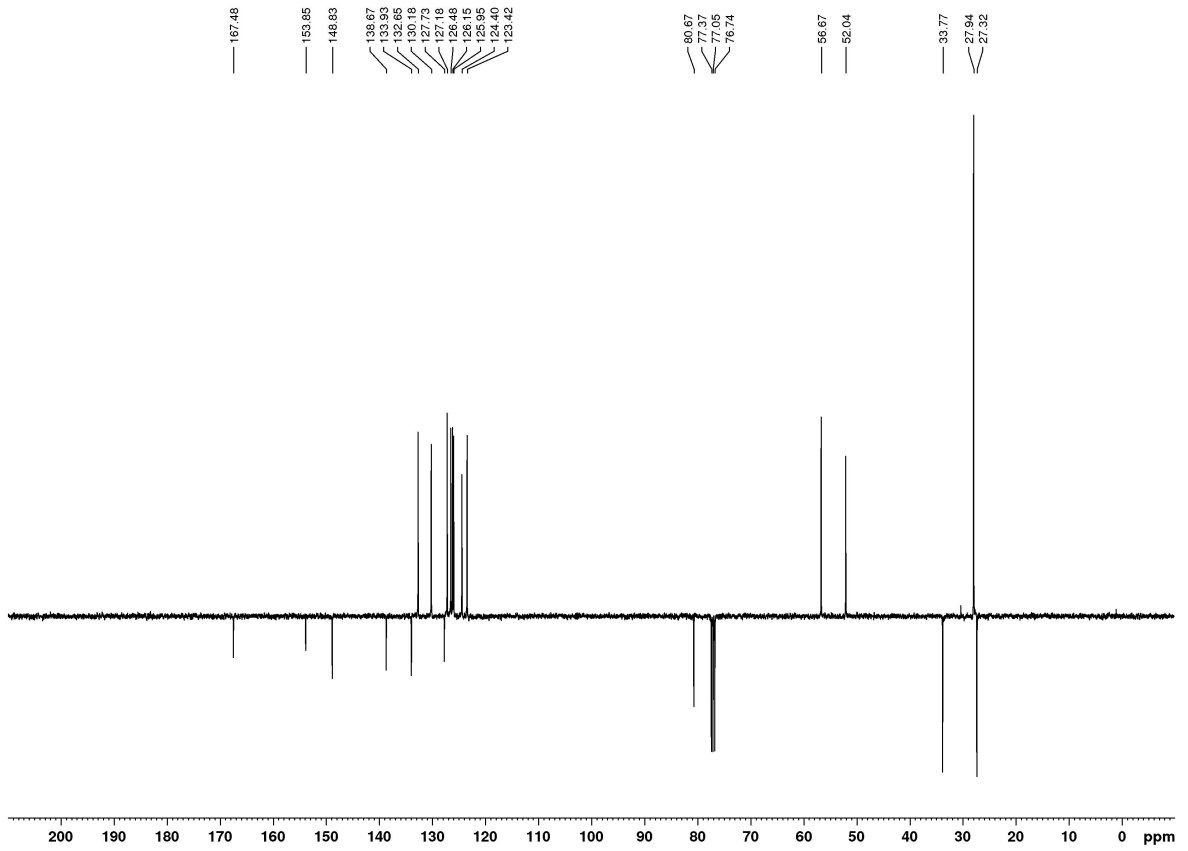



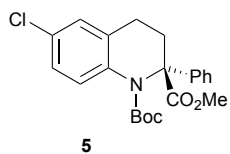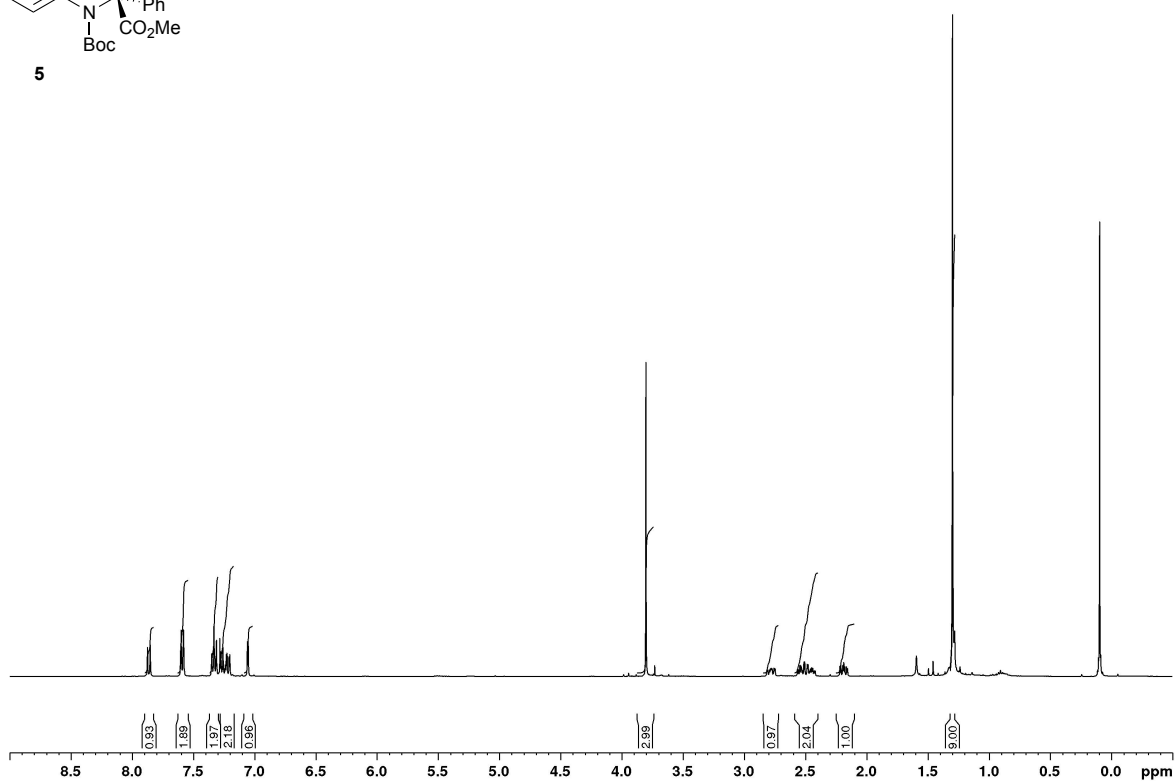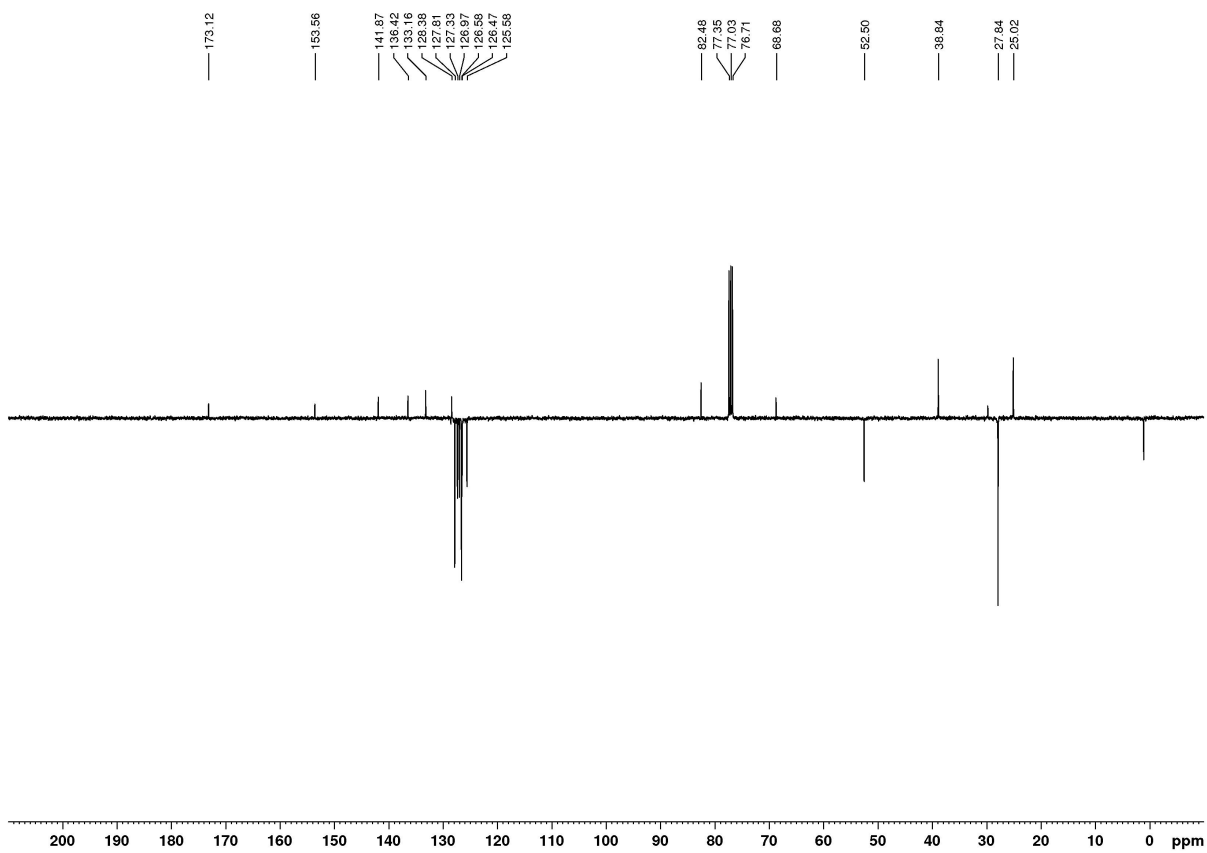

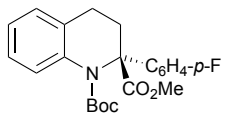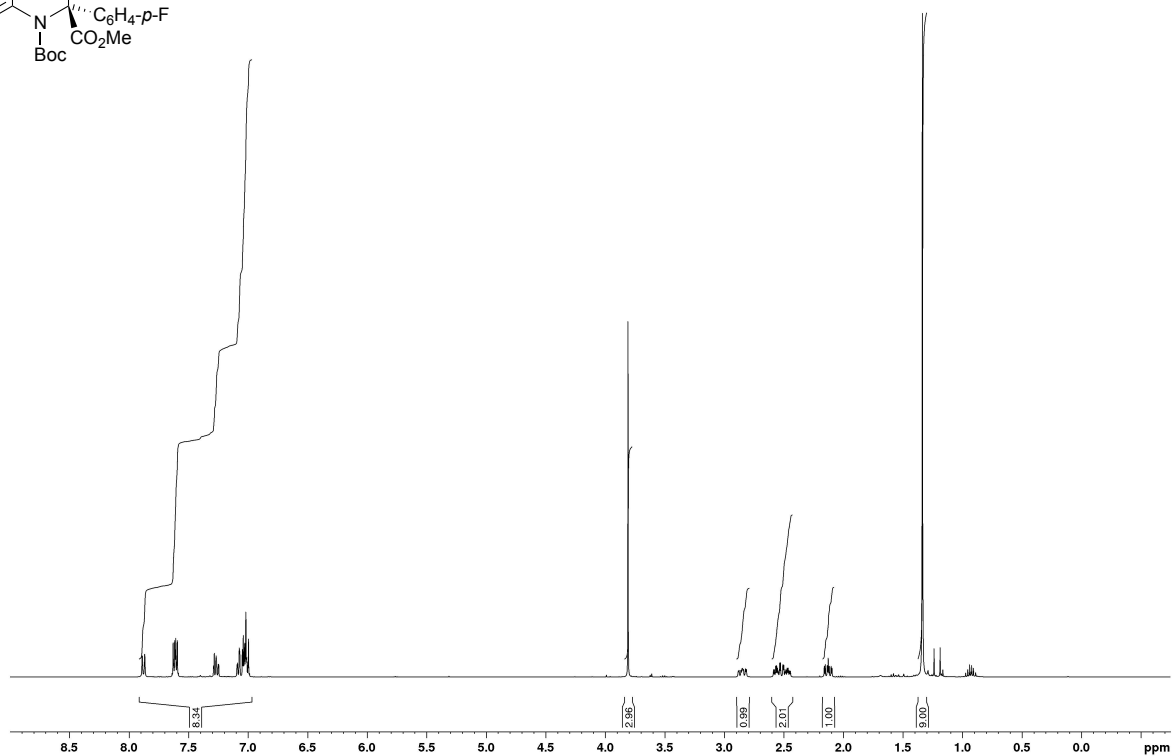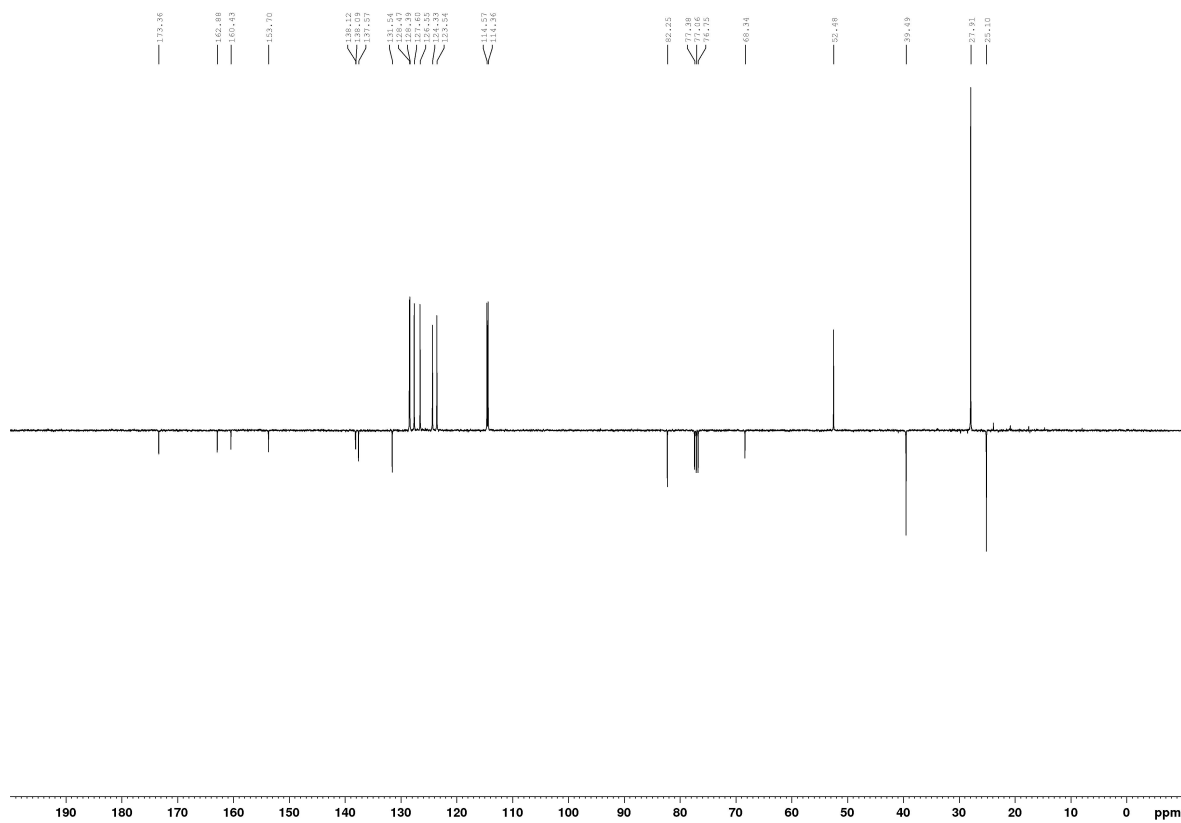

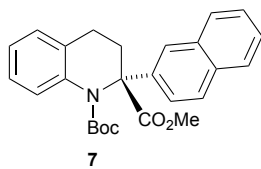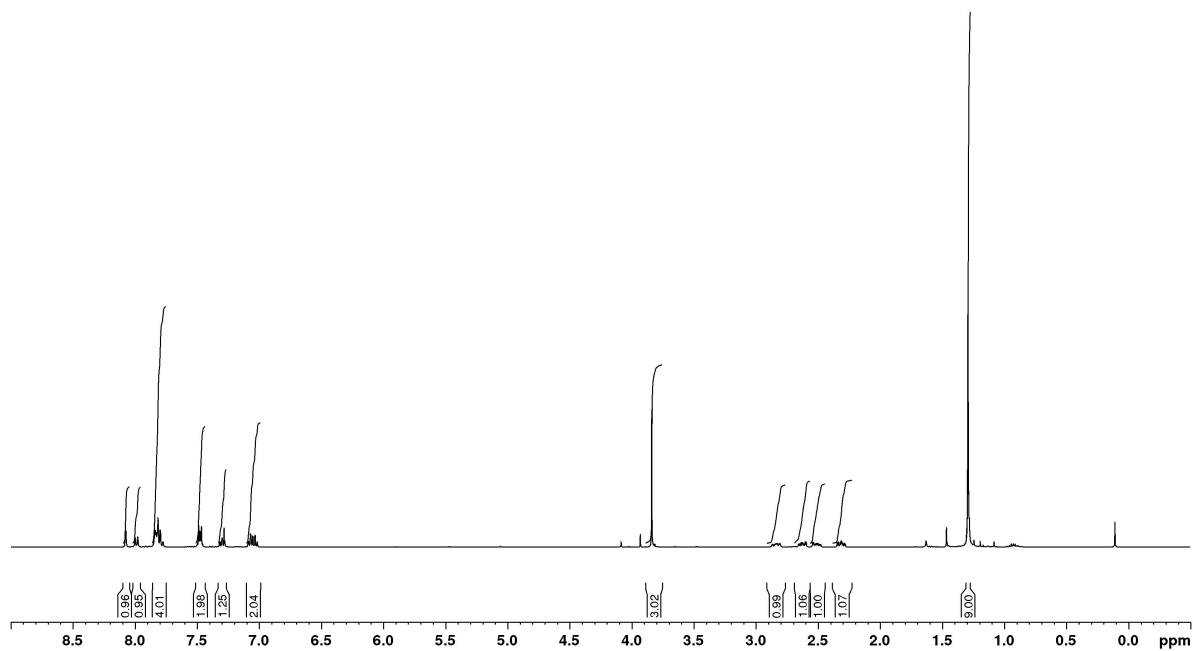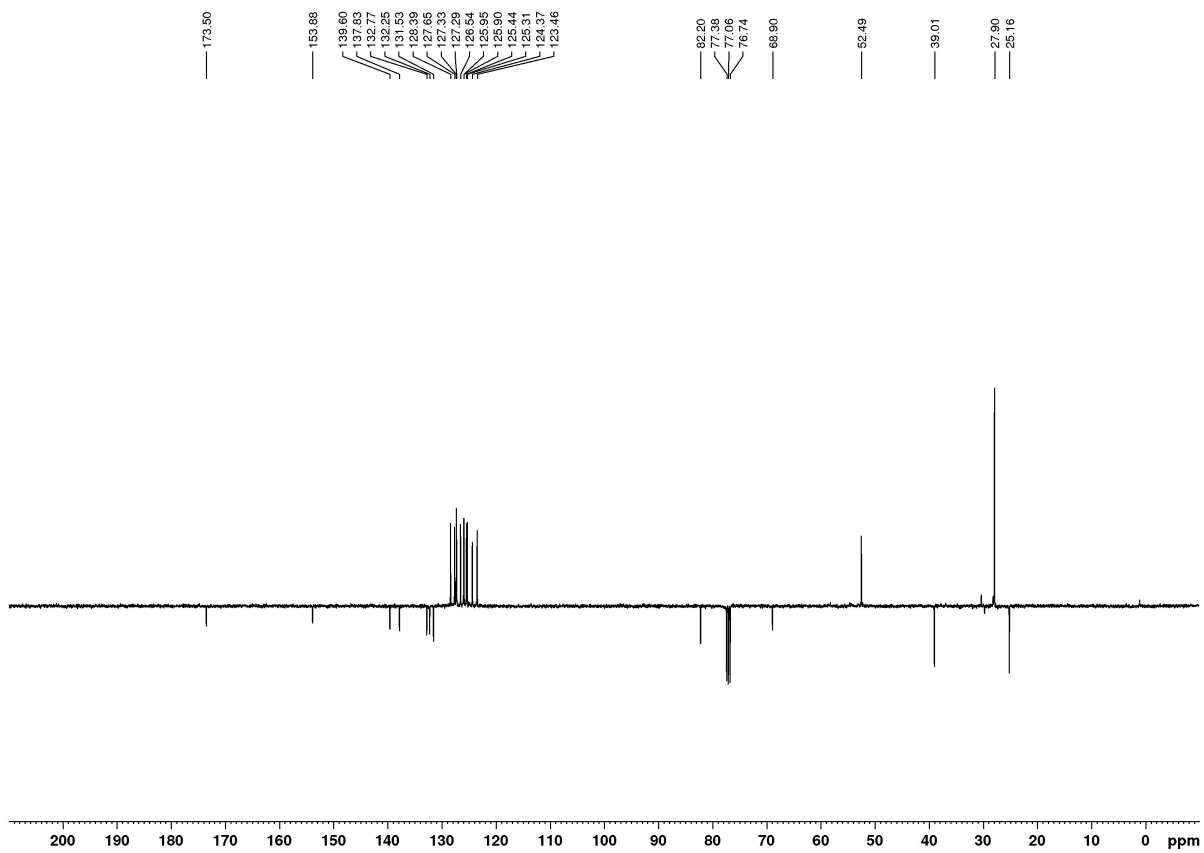

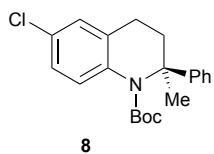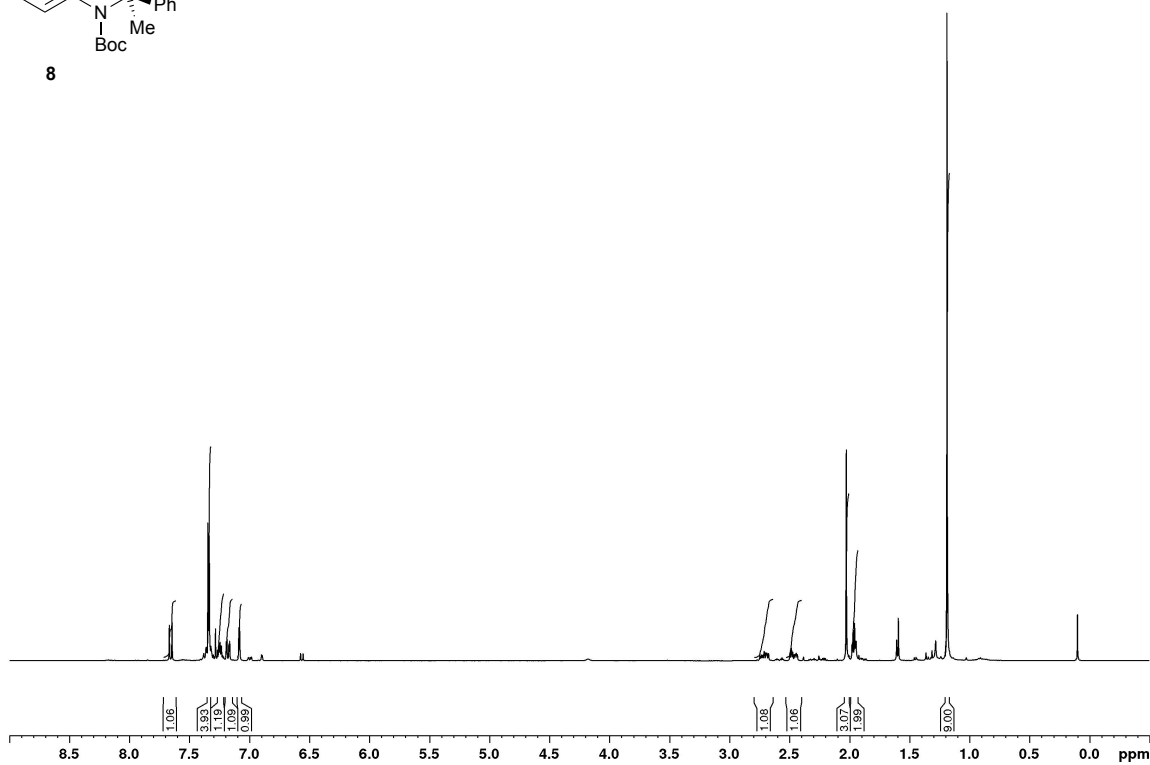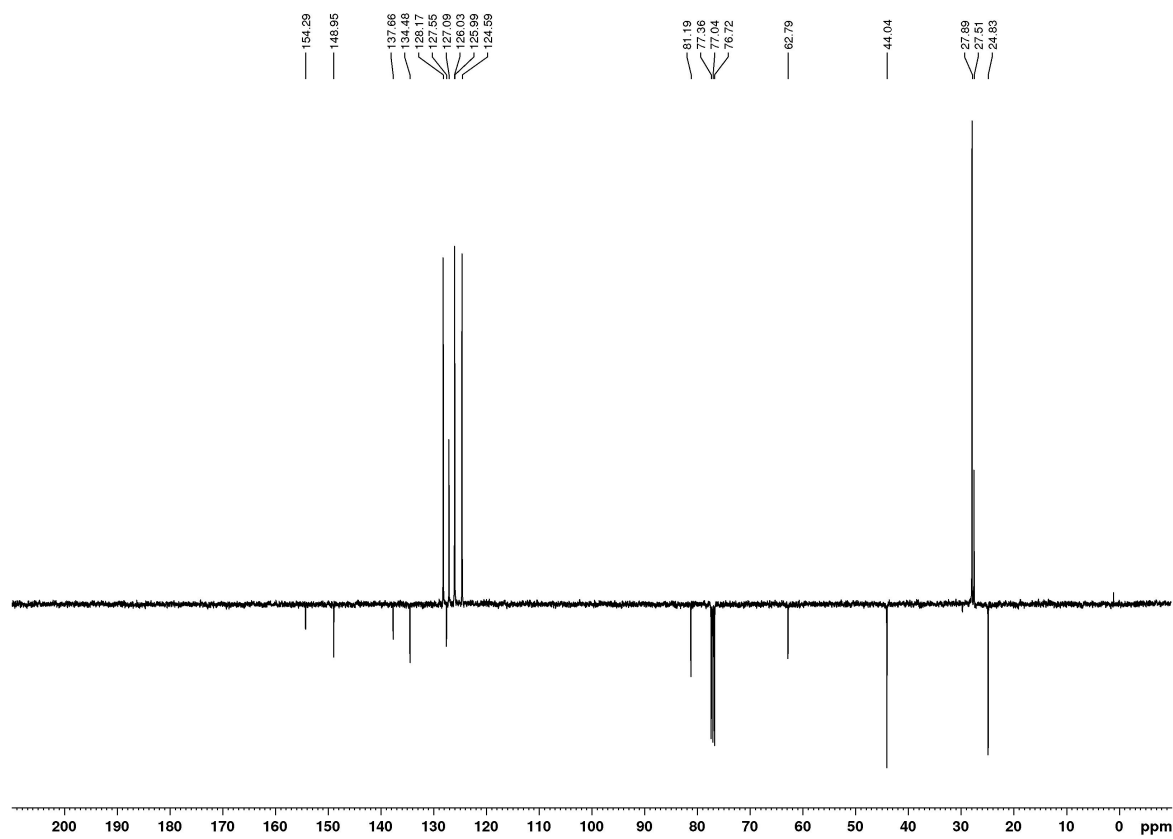

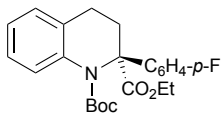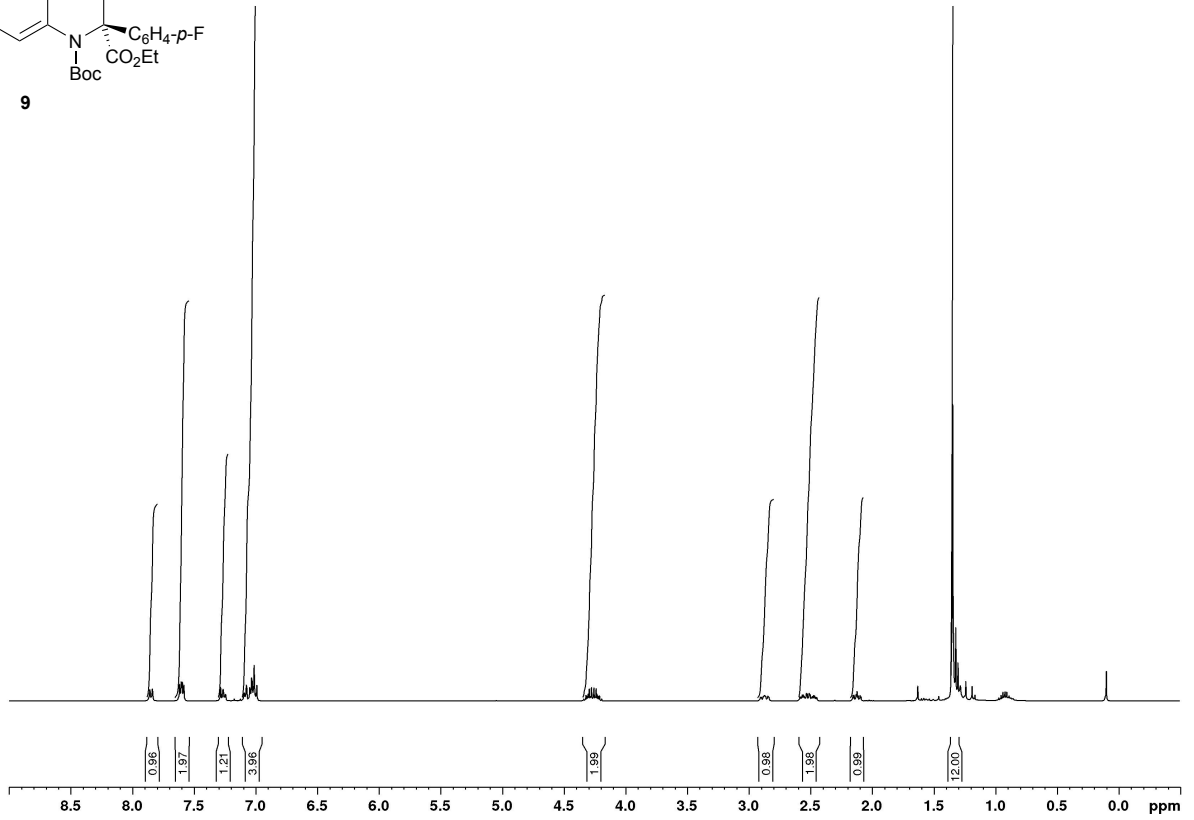

172.75  
 162.85  
 160.41  
 153.71  
 138.13  
 138.10  
 137.88  
 131.80  
 128.95  
 128.85  
 127.54  
 126.52  
 124.37  
 123.52  
 114.54  
 114.33  
 82.22  
 77.37  
 77.05  
 76.73  
 68.16  
 61.61  
 39.63  
 27.94  
 26.12  
 14.17

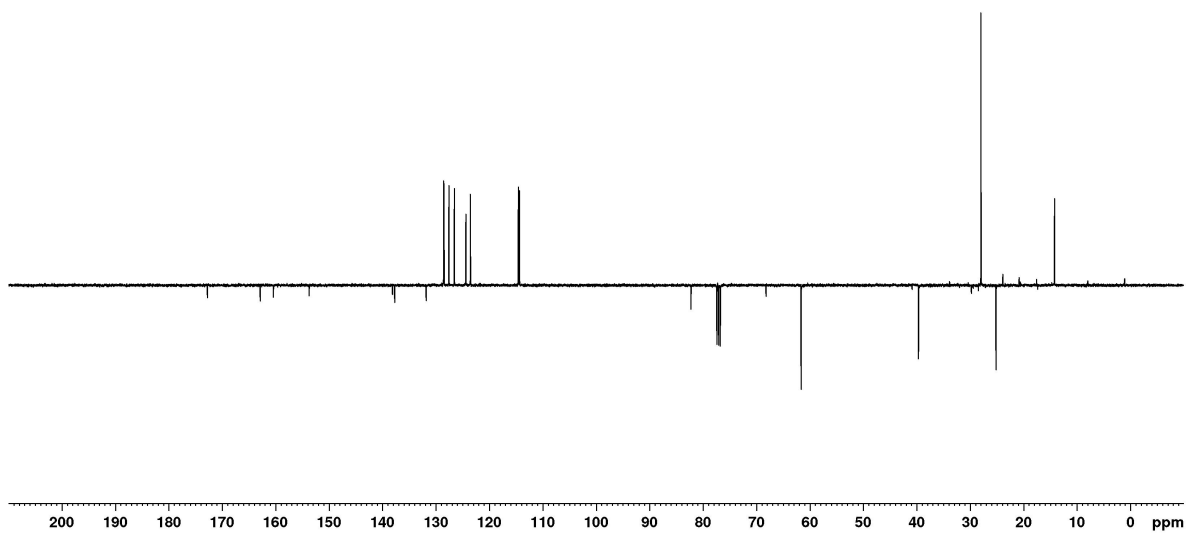

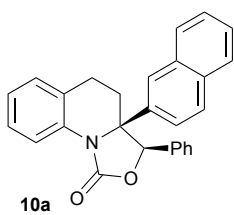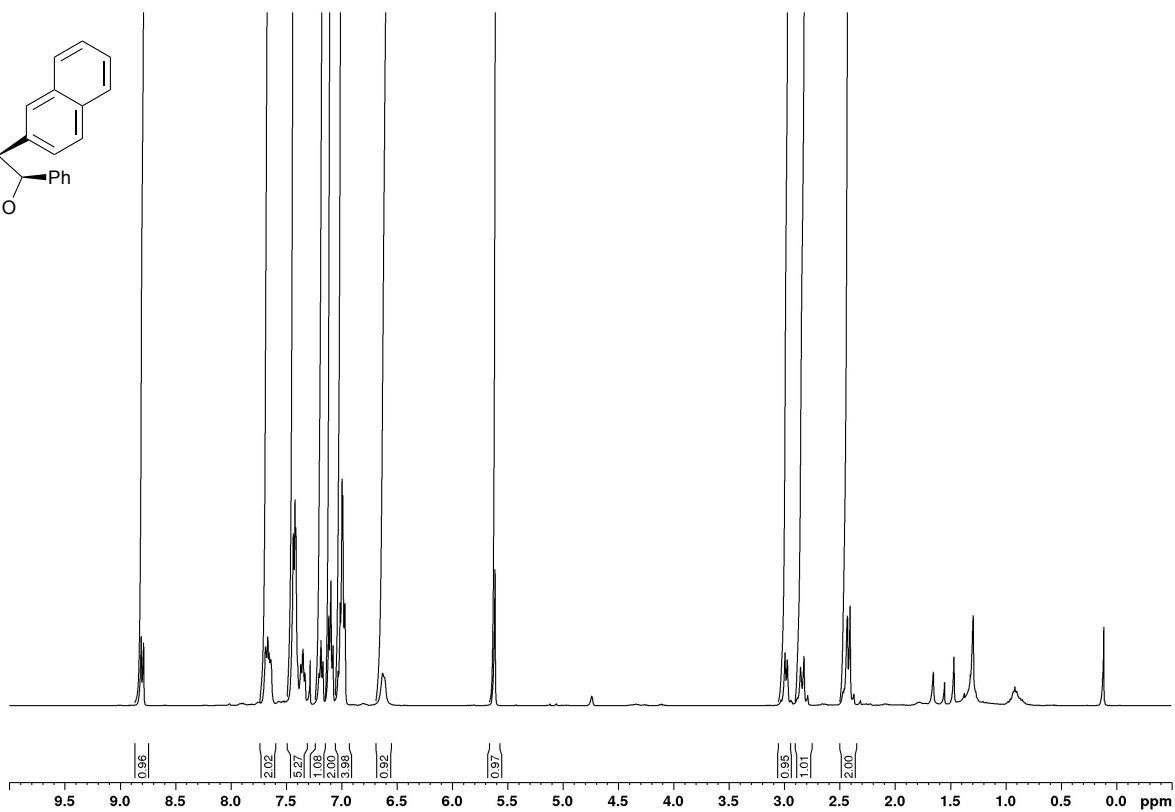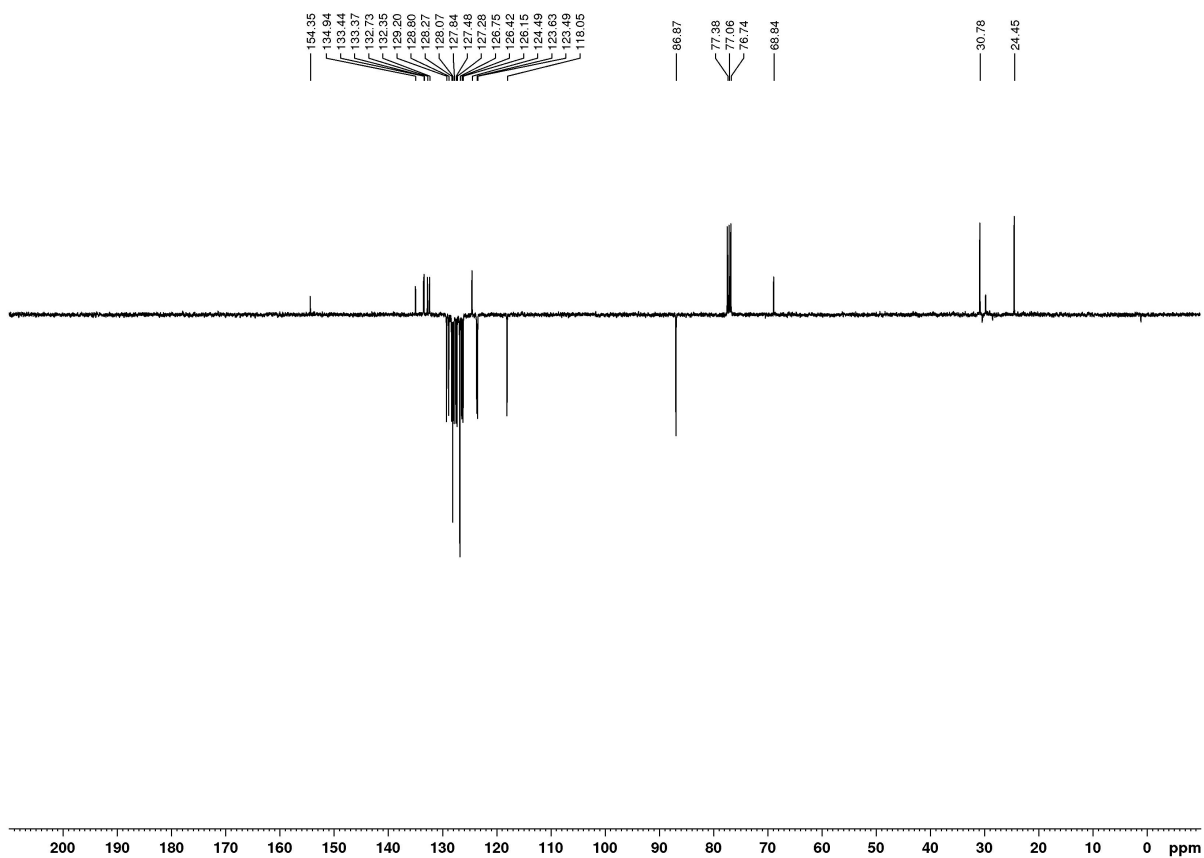

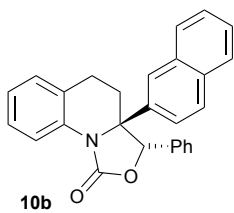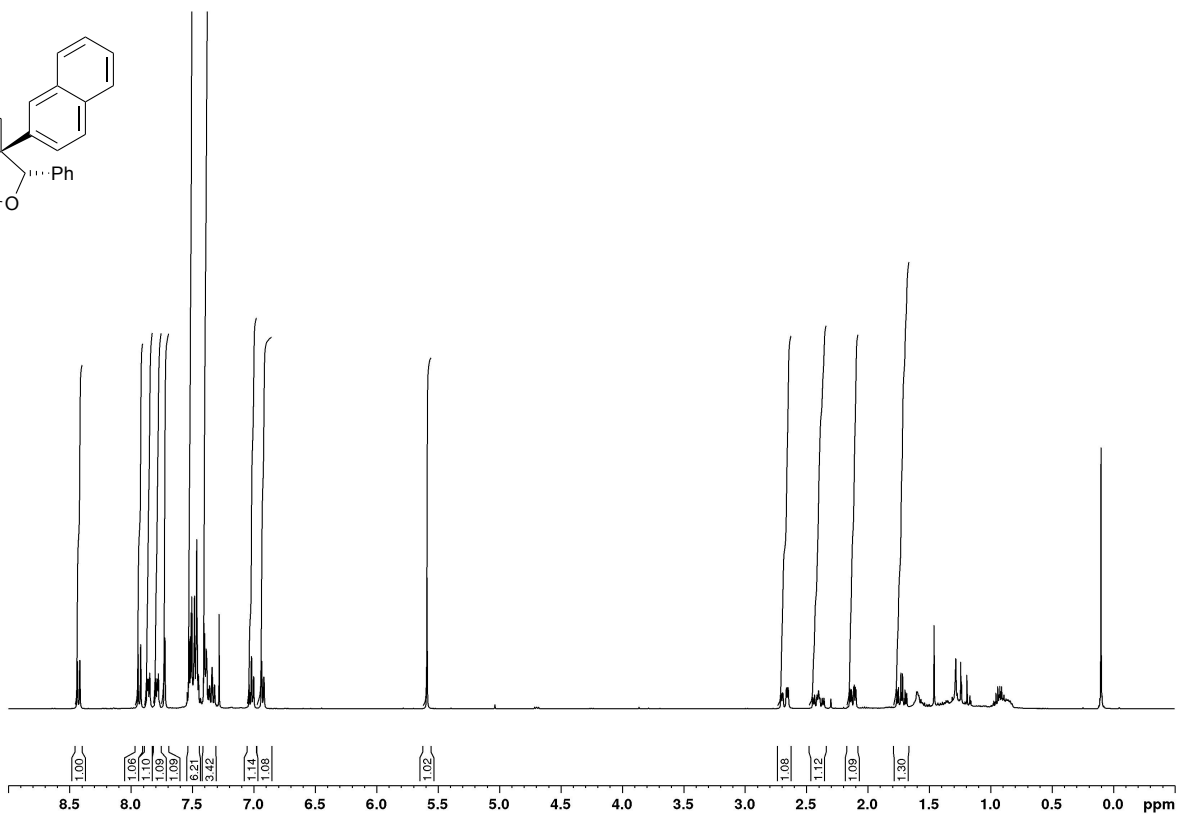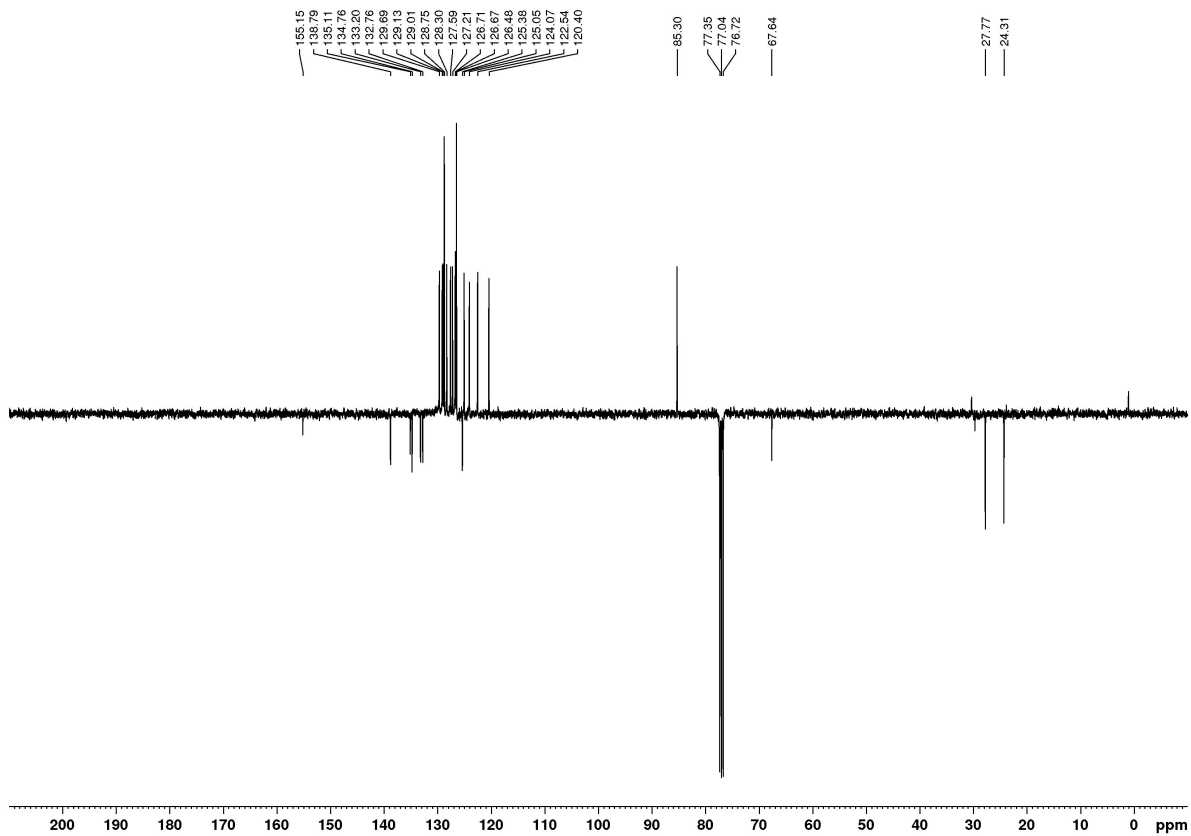

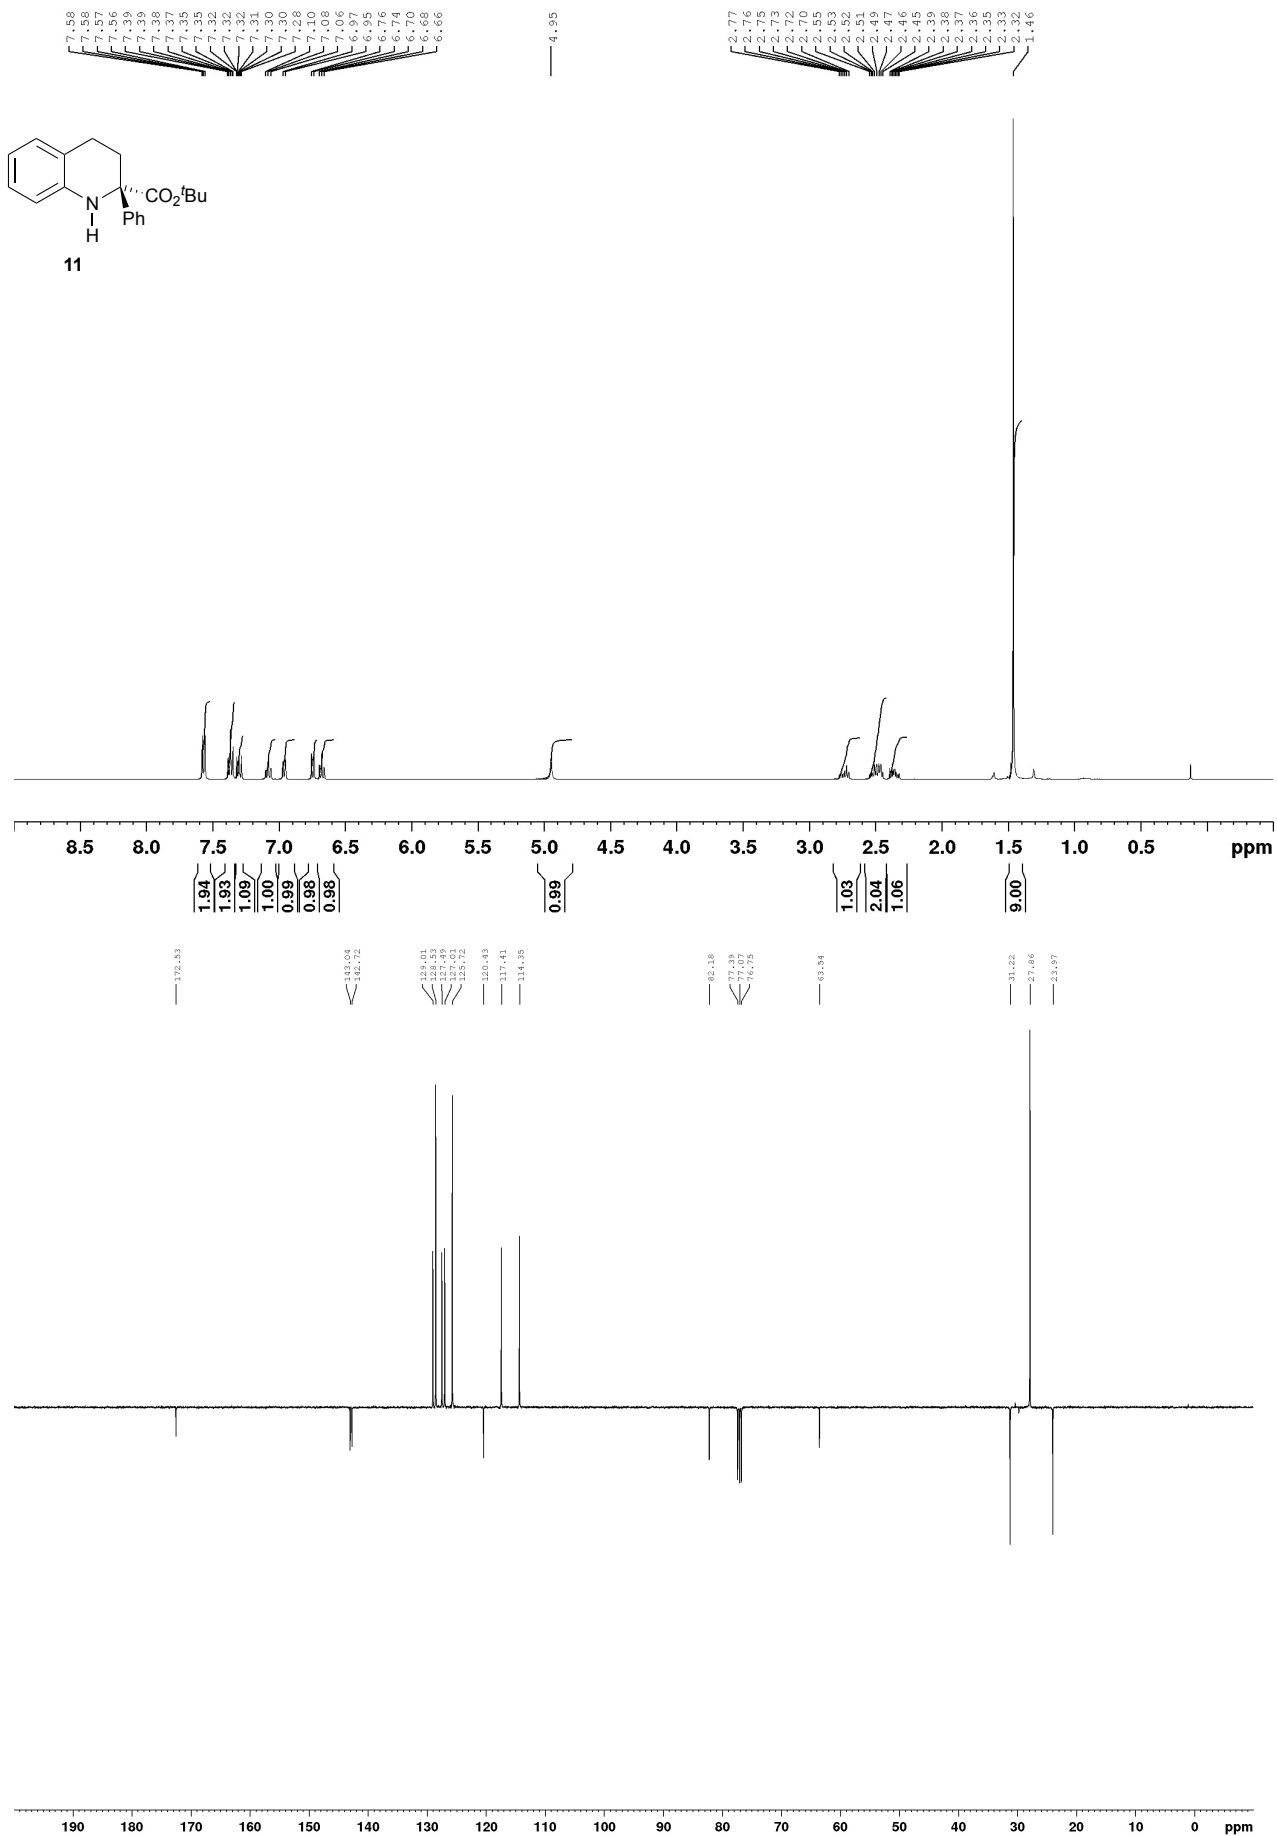



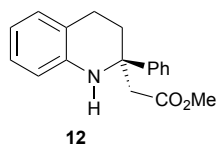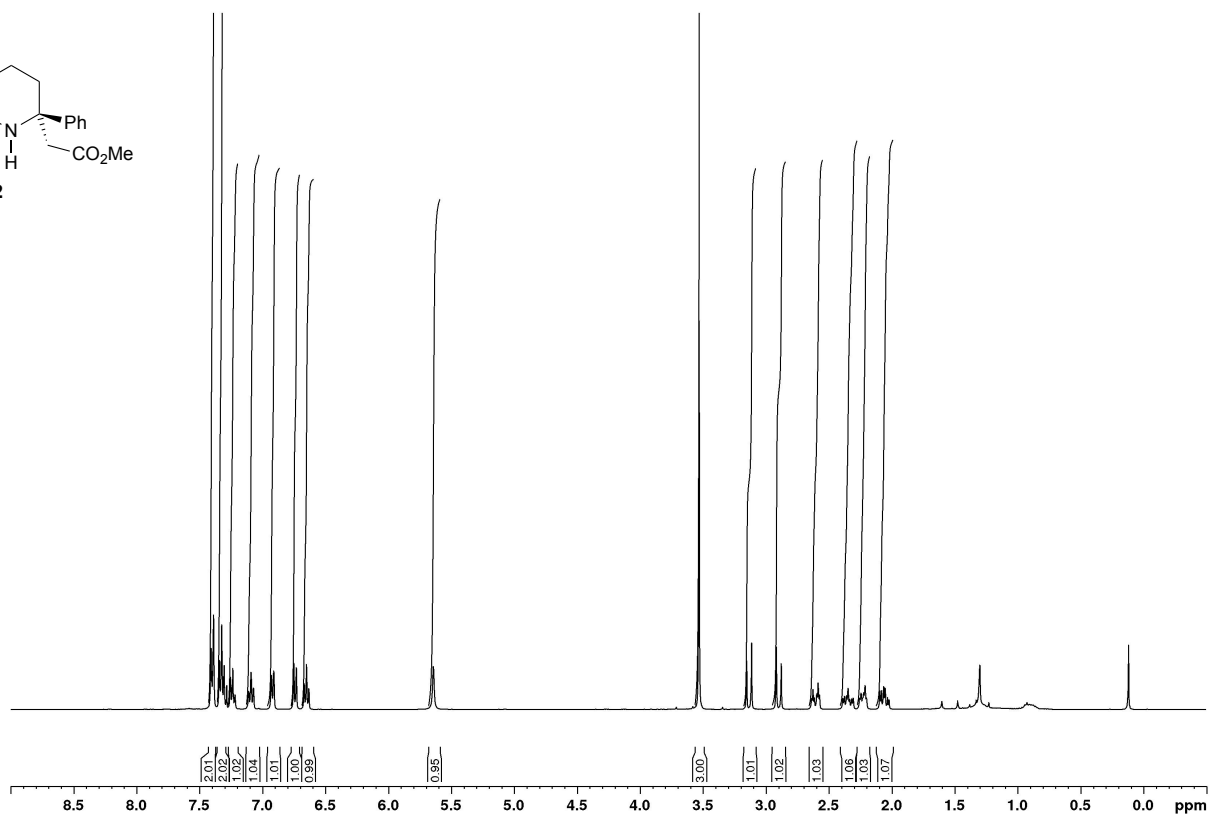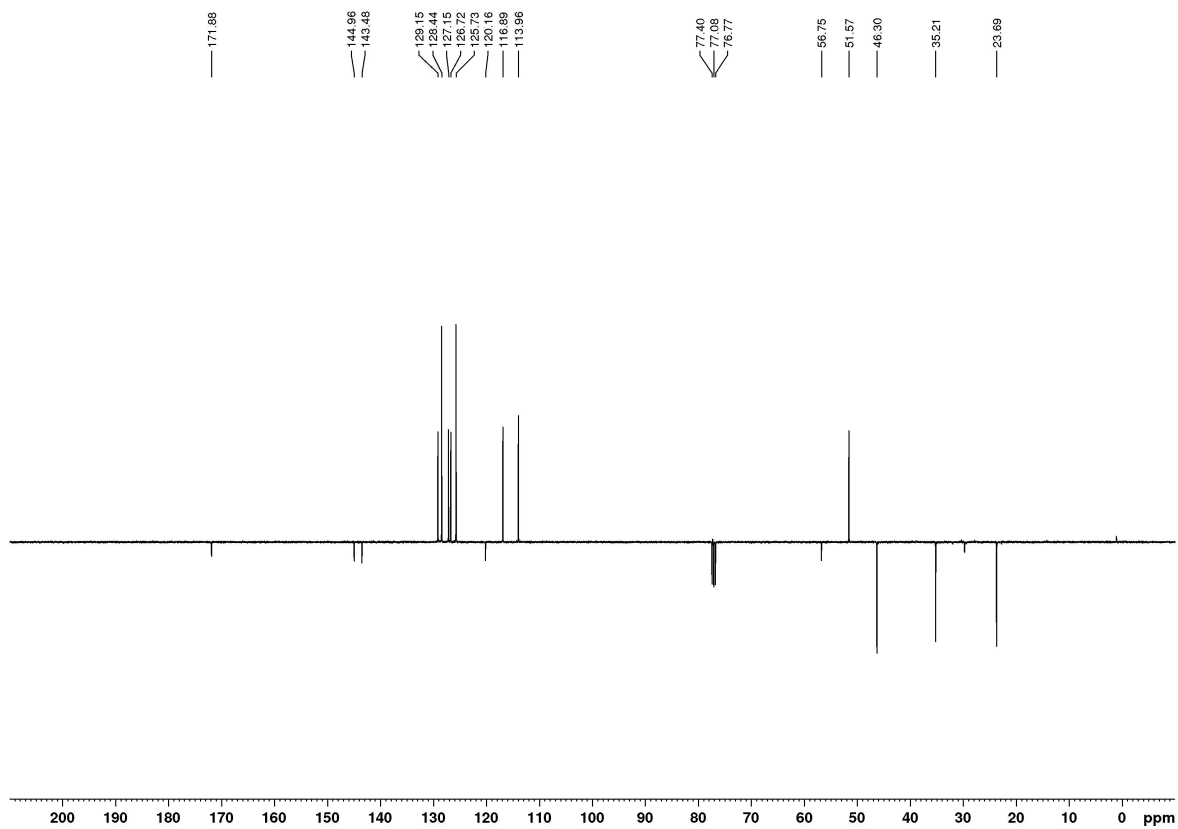

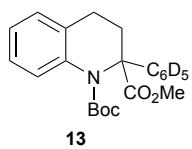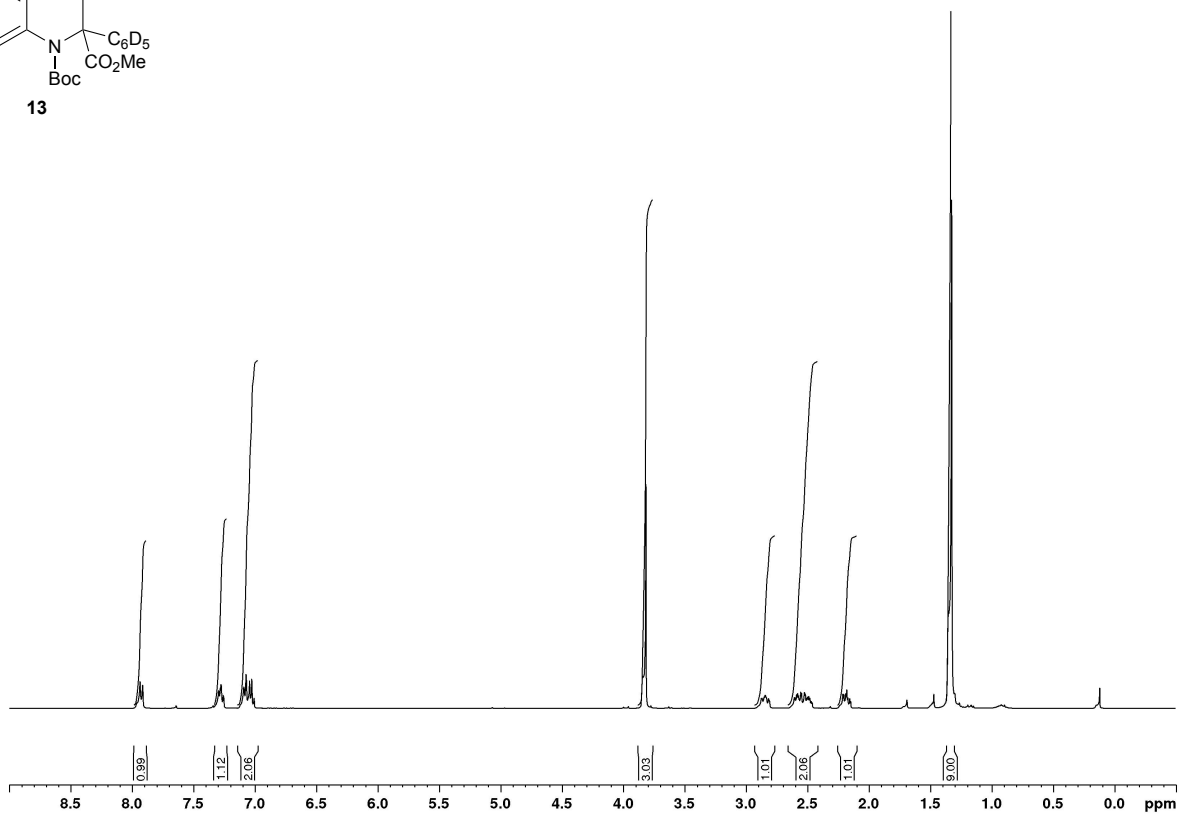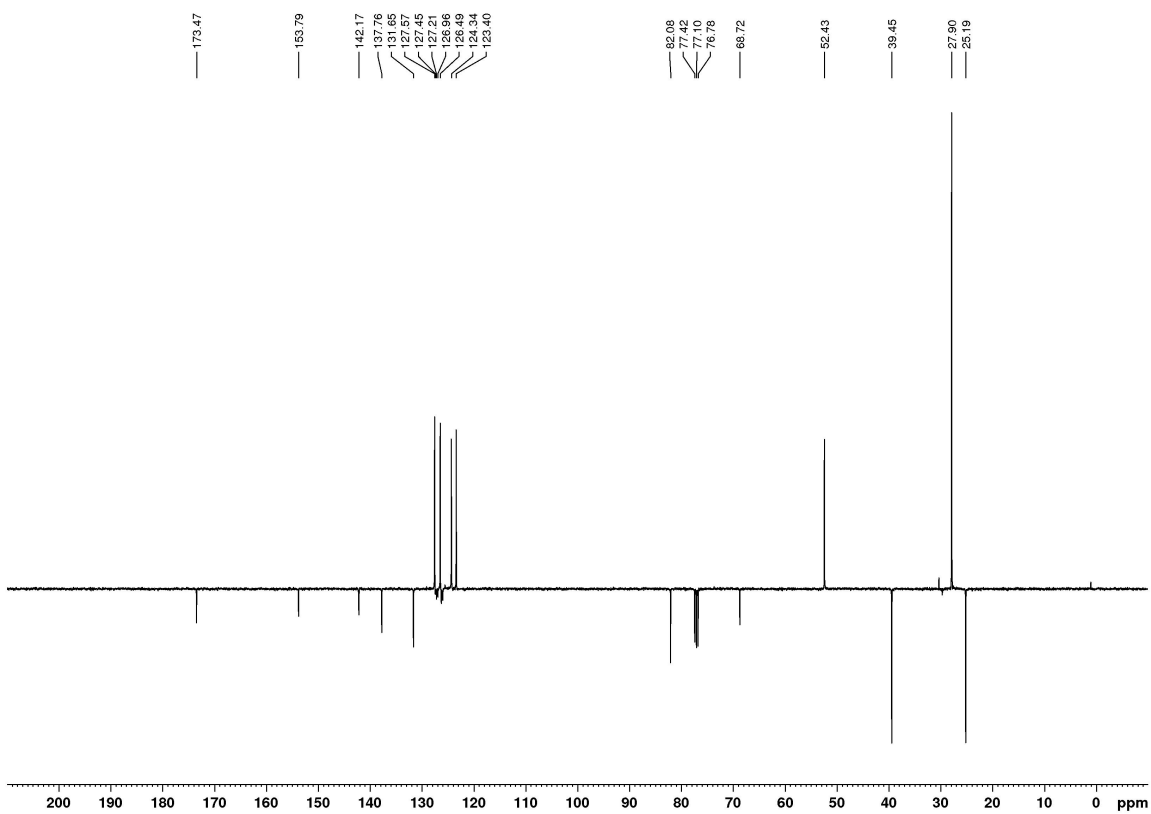

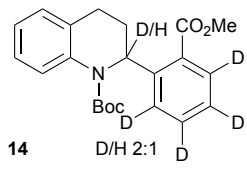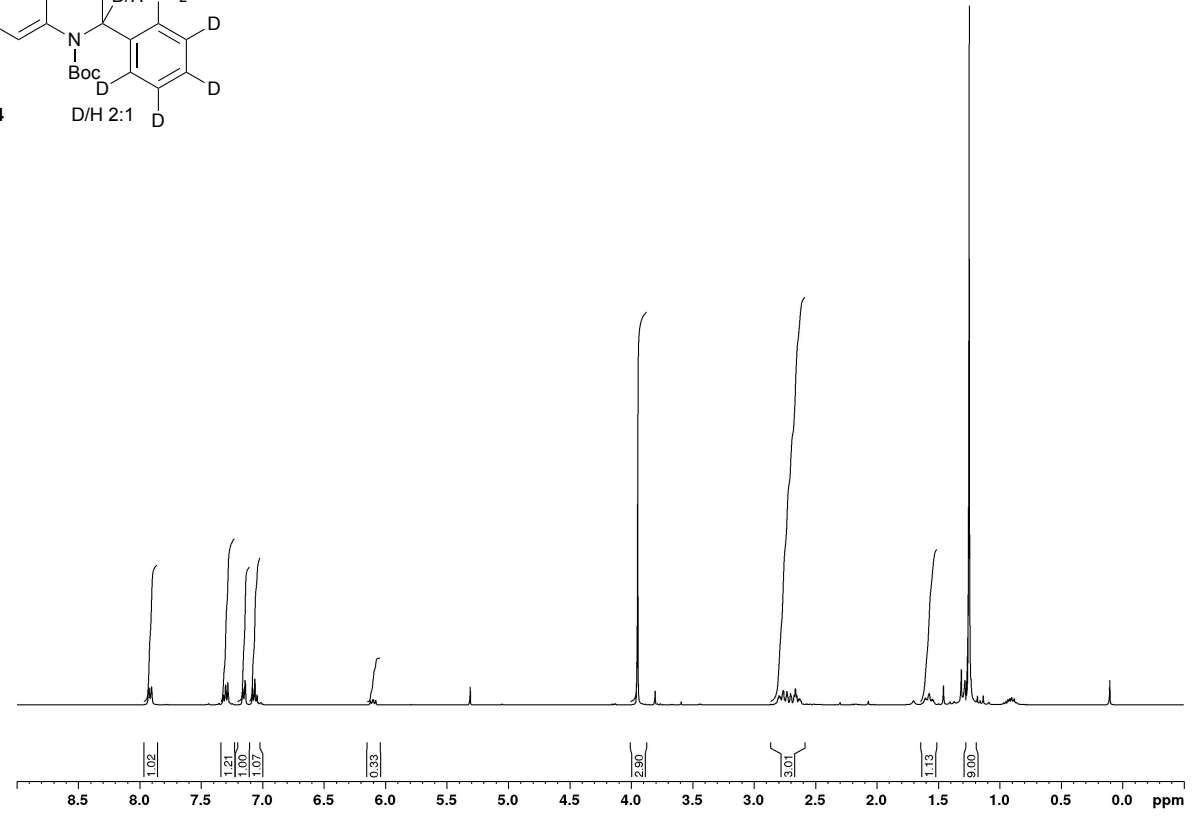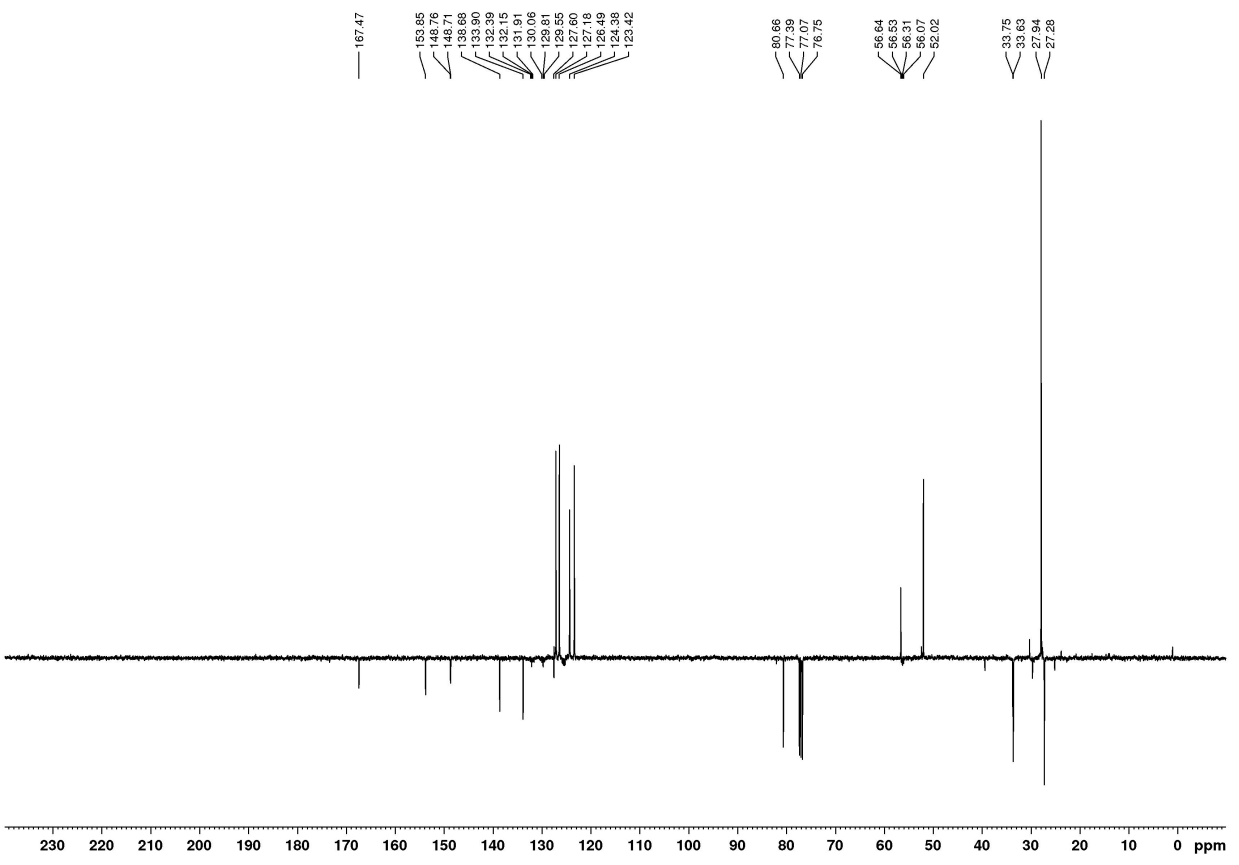

## 10. References

1. Z. Zhang, A. M. Olland, Y. Zhu, J. Cohen, T. Berrodin, S. Chippari, C. Appavu, S. Li, J. Wilhem, R. Chopra, A. Fensome, P. Zhang, J. Wrobel, R. J. Unwalla, C. R. Lyttle and R. C. Winneker, *J. Biol. Chem.*, 2005, **280**, 28468.
2. N. T. Patil and V. S. Raut, *J. Org. Chem.*, 2010, **75**, 6961.
3. A. D. Lackner, A. V. Samant and F. D. Toste, *J. Am. Chem. Soc.*, 2013, **135**, 14090.
4. M. Rueping, A. P. Antonchick and T. Theissmann, *Angew. Chem., Int. Ed.*, 2006, **45**, 3683.
5. Y. K. Liu, S. J. Lou, D. Q. Xu and Z. Y. Xu, *Chem. Eur. J.*, 2010, **16**, 13590.
6. X. Ji, H. Huang, Y. Li, H. Chen and H. Jiang, *Angew. Chem., Int. Ed.*, 2012, **51**, 7292.
7. B. Bortolotti, R. Leardini, D. Nanni and G. Zanardi, *Tetrahedron*, 1993, **49**, 10157.
8. Z-Y. Han, H. Xiao, X.-H. Chen and L.-Z. Gong, *J. Am. Chem. Soc.*, 2009, **131**, 9182.
9. C. S. Cho, B. T. Kim, H.-J. Choi, T.-J. Kim and S. C. Shim, *Tetrahedron*, 2003, **59**, 7997.
10. M. Tobisu, I. Hyodo and N. Chatani, *J. Am. Chem. Soc.*, 2009, **131**, 12070.
11. T. Aeyad, J. D. Williams, A. J. H. M. Meyer and I. Coldham, *Synlett*, 2017, **28**, 2765.

## 11. DFT data

**Synthesis and Kinetic Resolution of Substituted Tetrahydroquinolines by Lithiation  
then Electrophilic Quench  
Supplementary information  
DFT Calculations**

Nicholas Carter,<sup>1</sup> Xiabing Li,<sup>1</sup> Lewis Reavey,<sup>1</sup> Anthony J. H. M. Meijer,<sup>1</sup> and Iain Coldham<sup>1</sup>

<sup>1</sup>*University of Sheffield, Department of Chemistry, Sheffield S3 7HF, United Kingdom*

(Dated: November 30, 2017)

In this section of the supporting information we provide information about the calculations we performed using the methodology outlined in the main paper. The first three sections describe the different rotamers for **2a**. The next four sections describe the different stereo isomers for the lithiated species with a single electrophile [either MeOC(O)Cl or MeOC(O)CN] and a single solvent molecule. The final three sections describe the lithiated species with two coordinated molecules of electrophile [either MeOC(O)Cl or MeOC(O)CN] or solvent, respectively.

## CONTENTS

|                                                                                                              |       |
|--------------------------------------------------------------------------------------------------------------|-------|
| S11.1. <b>2a</b> , Boc group pointing away from Phenyl                                                       | S-139 |
| S11.1.1. Cartesian Co-ordinates (XYZ format)                                                                 | S-139 |
| S11.1.2. Frequencies                                                                                         | S-140 |
| S11.2. <b>2a</b> , TS between Boc group away and to Phenyl                                                   | S-143 |
| S11.2.1. Cartesian Co-ordinates (XYZ format)                                                                 | S-143 |
| S11.2.2. Frequencies                                                                                         | S-144 |
| S11.3. <b>2a</b> , Boc group pointing to Phenyl                                                              | S-147 |
| S11.3.1. Cartesian Co-ordinates (XYZ format)                                                                 | S-147 |
| S11.3.2. Frequencies                                                                                         | S-148 |
| S11.4. Lithiated intermediate from <b>2a</b> with coordinated Chloroformate and THF (1 <sup>st</sup> isomer) | S-151 |
| S11.4.1. Cartesian Co-ordinates (XYZ format)                                                                 | S-151 |
| S11.4.2. Frequencies                                                                                         | S-153 |
| S11.5. Lithiated intermediate from <b>2a</b> with coordinated Chloroformate and THF (2 <sup>nd</sup> isomer) | S-157 |
| S11.5.1. Cartesian Co-ordinates (XYZ format)                                                                 | S-157 |
| S11.5.2. Frequencies                                                                                         | S-159 |
| S11.6. Lithiated intermediate from <b>2a</b> with coordinated Cyanoformate and THF (1 <sup>st</sup> isomer)  | S-163 |
| S11.6.1. Cartesian Co-ordinates (XYZ format)                                                                 | S-163 |
| S11.6.2. Frequencies                                                                                         | S-165 |
| S11.7. Lithiated intermediate from <b>2a</b> with coordinated Cyanoformate and THF (2 <sup>nd</sup> isomer)  | S-169 |
| S11.7.1. Cartesian Co-ordinates (XYZ format)                                                                 | S-169 |
| S11.7.2. Frequencies                                                                                         | S-171 |
| S11.8. Lithiated intermediate from <b>2a</b> with coordinated Chloroformate                                  | S-175 |
| S11.8.1. Cartesian Co-ordinates (XYZ format)                                                                 | S-175 |
| S11.8.2. Frequencies                                                                                         | S-177 |
| S11.9. Lithiated intermediate from <b>2a</b> with coordinated Cyanoformate                                   | S-180 |
| S11.9.1. Cartesian Co-ordinates (XYZ format)                                                                 | S-180 |
| S11.9.2. Frequencies                                                                                         | S-182 |
| S11.10. Lithiated intermediate from <b>2a</b> with coordinated THF                                           | S-185 |
| S11.10.1. Cartesian Co-ordinates (XYZ format)                                                                | S-185 |
| S11.10.2. Frequencies                                                                                        | S-187 |

## S11.1. 2a, BOC GROUP POINTING AWAY FROM PHENYL

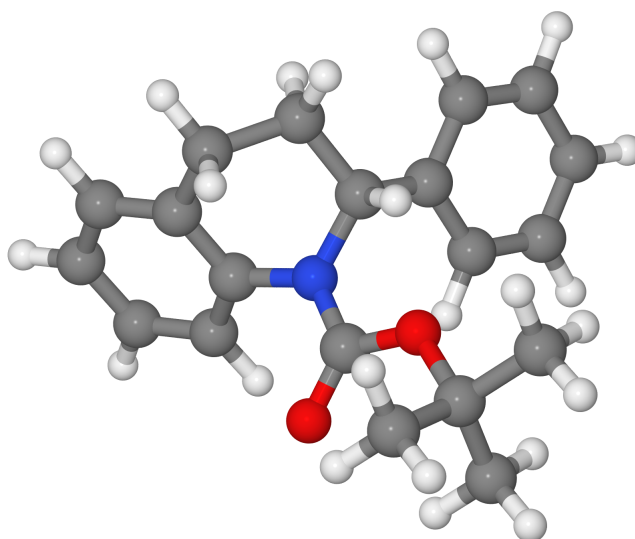

```

Route : # opt freq b3lyp/6-311g(d,p) scrf=(solvent=thf)
       geom=connectivity empiricaldispersion=gd3bj int=ultrafine
       pop=(regular,mk)
SMILES : CC(C)(C)OC(=O)N1c2ccccc2CCC1c3ccccc3
Formula : C20H23NO2
Charge : 0
Multiplicity : 1
Dipole : 9.1910 Debye
Energy : -981.57965409 a.u.
Gibbs Energy : -981.24190500 a.u.
Number of imaginary frequencies : 0

```

## S11.1.1. Cartesian Co-ordinates (XYZ format)

46

```

C 1.58104396 3.88230610 1.34155297
C 1.93761206 2.62221694 1.81536400
C 1.45609903 1.47163904 1.19717205
C 0.62616903 1.57740402 0.07710600
C 0.25035501 2.84446597 -0.39835599
C 0.72743303 3.98355603 0.24577300
N 0.11251300 0.43614501 -0.60411602
C -1.26039696 0.45425200 -1.18224502
C -1.83911097 1.87672198 -1.19658506
C -0.74404699 2.89496994 -1.52427006
C 0.88705099 -0.69609499 -0.76883000
O 2.00706410 -0.84740400 -0.31876501
O 0.22460000 -1.59950304 -1.51247501
C 0.67816401 -2.99999499 -1.61281800
C 0.75435603 -3.61177802 -0.21512000
C 2.00771189 -3.06875110 -2.36068010
C -0.44068700 -3.64721107 -2.42399096
C -2.18244004 -0.50479603 -0.45317999
C -2.11920094 -0.64981902 0.93395799

```

C -2.98685694 -1.51720905 1.59300697  
 C -3.93340302 -2.24471211 0.87251502  
 C -4.00563097 -2.09829807 -0.51143497  
 C -3.13208890 -1.23416400 -1.16809201  
 H 1.95323098 4.77658892 1.82714105  
 H 2.58743310 2.52778411 2.67759800  
 H 1.73646605 0.49745199 1.56524599  
 H 0.42212701 4.95820904 -0.11955200  
 H -2.26777911 2.11715698 -0.21990199  
 H -2.65317512 1.89723396 -1.92391801  
 H -1.15595198 3.90021396 -1.62797403  
 H -0.26969299 2.63297200 -2.47796702  
 H 0.95640397 -4.68194008 -0.29989299  
 H -0.19861300 -3.48014307 0.30262700  
 H 1.54648602 -3.15206909 0.37327799  
 H 2.26788497 -4.11469507 -2.54110003  
 H 1.92109799 -2.56604600 -3.32693791  
 H 2.80280209 -2.59803796 -1.78656006  
 H -0.22428299 -4.70698500 -2.57386804  
 H -0.52907097 -3.16821408 -3.40144205  
 H -1.39338899 -3.55006289 -1.90088201  
 H -1.37983704 -0.09348100 1.49821699  
 H -2.92296004 -1.62671304 2.66957808  
 H -4.60608101 -2.92225003 1.38522100  
 H -4.73385715 -2.66436291 -1.08092403  
 H -3.17558408 -1.13787198 -2.24770498  
 H -1.16899204 0.12253500 -2.21630192

### S11.1.2. Frequencies

| Mode | IR frequency | IR intensity | Raman intensity |
|------|--------------|--------------|-----------------|
| 1    | 20.74870000  | 0.33460000   | 0.00000000      |
| 2    | 23.68350000  | 0.02710000   | 0.00000000      |
| 3    | 34.21480000  | 1.35250000   | 0.00000000      |
| 4    | 45.12910000  | 0.55480000   | 0.00000000      |
| 5    | 67.08520000  | 1.64340000   | 0.00000000      |
| 6    | 90.95160000  | 1.15710000   | 0.00000000      |
| 7    | 101.23510000 | 1.62680000   | 0.00000000      |
| 8    | 126.92380000 | 0.45430000   | 0.00000000      |
| 9    | 166.04180000 | 0.32150000   | 0.00000000      |
| 10   | 168.80240000 | 4.10410000   | 0.00000000      |
| 11   | 209.57470000 | 0.35240000   | 0.00000000      |
| 12   | 215.47030000 | 3.53170000   | 0.00000000      |
| 13   | 237.23740000 | 4.26530000   | 0.00000000      |
| 14   | 251.07900000 | 0.28650000   | 0.00000000      |
| 15   | 256.60170000 | 1.00270000   | 0.00000000      |
| 16   | 274.24180000 | 0.25840000   | 0.00000000      |
| 17   | 277.84850000 | 0.21760000   | 0.00000000      |
| 18   | 297.36340000 | 3.43250000   | 0.00000000      |
| 19   | 332.70360000 | 12.88520000  | 0.00000000      |
| 20   | 348.52120000 | 7.07700000   | 0.00000000      |
| 21   | 357.17720000 | 3.22120000   | 0.00000000      |
| 22   | 397.37980000 | 4.93640000   | 0.00000000      |
| 23   | 414.01440000 | 0.16260000   | 0.00000000      |
| 24   | 416.25060000 | 0.22670000   | 0.00000000      |
| 25   | 431.46630000 | 2.90010000   | 0.00000000      |
| 26   | 459.43650000 | 6.55250000   | 0.00000000      |
| 27   | 472.66170000 | 3.81170000   | 0.00000000      |
| 28   | 477.05970000 | 7.90930000   | 0.00000000      |
| 29   | 501.29520000 | 6.88470000   | 0.00000000      |
| 30   | 539.64710000 | 9.32130000   | 0.00000000      |
| 31   | 556.91710000 | 1.42300000   | 0.00000000      |



|    |               |              |            |
|----|---------------|--------------|------------|
| 32 | 578.21650000  | 10.29290000  | 0.00000000 |
| 33 | 613.45780000  | 10.79260000  | 0.00000000 |
| 34 | 635.78100000  | 0.32200000   | 0.00000000 |
| 35 | 647.09240000  | 1.64410000   | 0.00000000 |
| 36 | 703.81660000  | 11.56030000  | 0.00000000 |
| 37 | 715.85320000  | 69.12920000  | 0.00000000 |
| 38 | 745.62140000  | 7.78110000   | 0.00000000 |
| 39 | 750.68200000  | 36.49150000  | 0.00000000 |
| 40 | 768.63530000  | 11.84760000  | 0.00000000 |
| 41 | 771.48170000  | 34.44190000  | 0.00000000 |
| 42 | 780.40420000  | 59.88660000  | 0.00000000 |
| 43 | 796.04570000  | 19.52880000  | 0.00000000 |
| 44 | 823.94910000  | 3.85490000   | 0.00000000 |
| 45 | 841.21460000  | 29.90230000  | 0.00000000 |
| 46 | 859.23650000  | 0.50050000   | 0.00000000 |
| 47 | 862.57010000  | 19.95500000  | 0.00000000 |
| 48 | 876.54090000  | 0.61570000   | 0.00000000 |
| 49 | 917.53200000  | 12.22810000  | 0.00000000 |
| 50 | 928.42870000  | 2.01190000   | 0.00000000 |
| 51 | 929.24290000  | 0.29720000   | 0.00000000 |
| 52 | 933.37990000  | 4.07600000   | 0.00000000 |
| 53 | 950.24520000  | 20.95450000  | 0.00000000 |
| 54 | 953.96310000  | 2.02700000   | 0.00000000 |
| 55 | 972.40410000  | 0.20930000   | 0.00000000 |
| 56 | 985.80120000  | 0.14030000   | 0.00000000 |
| 57 | 988.35670000  | 0.05790000   | 0.00000000 |
| 58 | 1004.43980000 | 0.19020000   | 0.00000000 |
| 59 | 1019.88560000 | 4.11280000   | 0.00000000 |
| 60 | 1023.62970000 | 46.13460000  | 0.00000000 |
| 61 | 1046.98410000 | 59.45930000  | 0.00000000 |
| 62 | 1050.70560000 | 6.50190000   | 0.00000000 |
| 63 | 1052.27440000 | 0.95990000   | 0.00000000 |
| 64 | 1059.47360000 | 15.54830000  | 0.00000000 |
| 65 | 1069.03650000 | 40.29220000  | 0.00000000 |
| 66 | 1073.91150000 | 0.10880000   | 0.00000000 |
| 67 | 1104.07570000 | 33.62840000  | 0.00000000 |
| 68 | 1134.51060000 | 26.25680000  | 0.00000000 |
| 69 | 1153.12380000 | 283.09810000 | 0.00000000 |
| 70 | 1176.78600000 | 13.96590000  | 0.00000000 |
| 71 | 1180.29880000 | 2.94290000   | 0.00000000 |
| 72 | 1181.76610000 | 458.31670000 | 0.00000000 |
| 73 | 1195.34430000 | 73.88500000  | 0.00000000 |
| 74 | 1199.36360000 | 21.92880000  | 0.00000000 |
| 75 | 1213.57740000 | 1.25360000   | 0.00000000 |
| 76 | 1222.84460000 | 4.64170000   | 0.00000000 |
| 77 | 1234.90420000 | 18.53430000  | 0.00000000 |
| 78 | 1260.33030000 | 106.00190000 | 0.00000000 |
| 79 | 1270.11040000 | 20.09890000  | 0.00000000 |
| 80 | 1282.75270000 | 40.31240000  | 0.00000000 |
| 81 | 1305.19520000 | 4.18810000   | 0.00000000 |
| 82 | 1318.74150000 | 4.94750000   | 0.00000000 |
| 83 | 1336.83940000 | 33.70720000  | 0.00000000 |
| 84 | 1341.64930000 | 77.23350000  | 0.00000000 |
| 85 | 1352.53360000 | 620.19080000 | 0.00000000 |
| 86 | 1354.15300000 | 6.36850000   | 0.00000000 |
| 87 | 1361.80150000 | 2.68770000   | 0.00000000 |
| 88 | 1386.42310000 | 137.40740000 | 0.00000000 |
| 89 | 1394.56500000 | 30.30930000  | 0.00000000 |
| 90 | 1398.27160000 | 48.88870000  | 0.00000000 |
| 91 | 1407.47470000 | 39.97870000  | 0.00000000 |
| 92 | 1421.28490000 | 23.12640000  | 0.00000000 |
| 93 | 1466.92820000 | 0.38720000   | 0.00000000 |
| 94 | 1478.30800000 | 13.11620000  | 0.00000000 |
| 95 | 1484.72210000 | 4.14990000   | 0.00000000 |

|     |               |              |            |
|-----|---------------|--------------|------------|
| 96  | 1485.80300000 | 15.20780000  | 0.00000000 |
| 97  | 1487.20770000 | 6.56180000   | 0.00000000 |
| 98  | 1489.25600000 | 15.25660000  | 0.00000000 |
| 99  | 1491.96040000 | 7.39910000   | 0.00000000 |
| 100 | 1493.10490000 | 20.31650000  | 0.00000000 |
| 101 | 1499.11100000 | 2.25410000   | 0.00000000 |
| 102 | 1519.61800000 | 22.46330000  | 0.00000000 |
| 103 | 1524.36390000 | 124.73600000 | 0.00000000 |
| 104 | 1528.20270000 | 16.13520000  | 0.00000000 |
| 105 | 1623.68560000 | 8.19890000   | 0.00000000 |
| 106 | 1629.02810000 | 0.88250000   | 0.00000000 |
| 107 | 1644.56440000 | 17.64780000  | 0.00000000 |
| 108 | 1646.75610000 | 10.84950000  | 0.00000000 |
| 109 | 1735.43250000 | 550.73700000 | 0.00000000 |
| 110 | 3012.23150000 | 40.98450000  | 0.00000000 |
| 111 | 3036.87570000 | 12.53510000  | 0.00000000 |
| 112 | 3038.64890000 | 37.20660000  | 0.00000000 |
| 113 | 3044.33430000 | 29.95430000  | 0.00000000 |
| 114 | 3045.29920000 | 24.53960000  | 0.00000000 |
| 115 | 3076.09340000 | 4.24760000   | 0.00000000 |
| 116 | 3086.94150000 | 43.55050000  | 0.00000000 |
| 117 | 3095.74570000 | 61.52550000  | 0.00000000 |
| 118 | 3099.27760000 | 15.83420000  | 0.00000000 |
| 119 | 3104.56200000 | 20.29920000  | 0.00000000 |
| 120 | 3110.37140000 | 60.80610000  | 0.00000000 |
| 121 | 3118.95800000 | 44.30770000  | 0.00000000 |
| 122 | 3138.41960000 | 10.85490000  | 0.00000000 |
| 123 | 3146.43500000 | 18.06820000  | 0.00000000 |
| 124 | 3158.88380000 | 8.40560000   | 0.00000000 |
| 125 | 3161.30500000 | 8.86490000   | 0.00000000 |
| 126 | 3165.59110000 | 0.21040000   | 0.00000000 |
| 127 | 3172.36420000 | 23.10880000  | 0.00000000 |
| 128 | 3174.16130000 | 20.12280000  | 0.00000000 |
| 129 | 3181.64860000 | 41.05600000  | 0.00000000 |
| 130 | 3188.61240000 | 40.89790000  | 0.00000000 |
| 131 | 3191.16490000 | 23.68940000  | 0.00000000 |
| 132 | 3236.97300000 | 2.05350000   | 0.00000000 |

## S11.2. 2a, TS BETWEEN BOC GROUP AWAY AND TO PHENYL

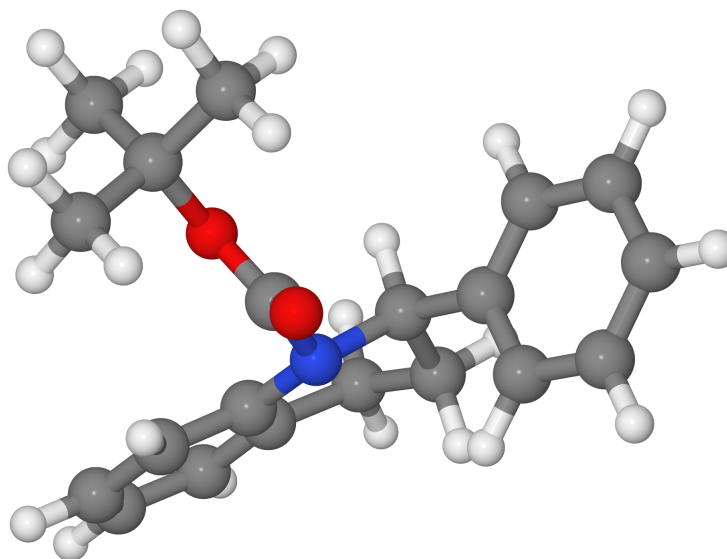

```

Route : # opt=(calcfc,qst3) freq b3lyp/6-311g(d,p) scrf=(solvent=thf)
      geom=connectivity empiricaldispersion=gd3bj int=ultrafine
      pop=(regular,mk)
SMILES : CC(C)(C)OC(=O)N1c2ccccc2CCC1c3ccccc3
Formula : C20H23NO2
Charge : 0
Multiplicity : 1
Dipole : 7.5805 Debye
Energy : -981.56168593 a.u.
Gibbs Energy : -981.22334300 a.u.
Number of imaginary frequencies : 1

```

## S11.2.1. Cartesian Co-ordinates (XYZ format)

46

```

C 2.33552194 3.93180394 0.48271501
C 2.74672389 2.68653297 0.95692998
C 1.92991197 1.57572103 0.79894698
C 0.69394702 1.67927694 0.14129600
C 0.26942599 2.93201303 -0.33316901
C 1.09880495 4.03925323 -0.14416599
N -0.11972400 0.52800697 0.02959000
C -1.37445104 0.59254402 -0.75887001
C -2.02104497 1.96635604 -0.56586403
C -1.06919897 3.06974506 -1.01720703
C 0.56685799 -0.71815097 -0.13731100
O 0.41398299 -1.66380799 0.59297299
O 1.34507704 -0.67348599 -1.21999002
C 2.20999408 -1.81601405 -1.61403501
C 1.33507299 -3.01963592 -1.95349002
C 3.21054506 -2.10679293 -0.49871799
C 2.91349196 -1.27736104 -2.85454988
C -2.31787801 -0.52668703 -0.37234199

```

C -2.67171407 -0.73607302 0.96325701  
 C -3.57960010 -1.73242497 1.30263603  
 C -4.14411783 -2.53568697 0.31009099  
 C -3.79164100 -2.33666801 -1.02152801  
 C -2.88008094 -1.33587003 -1.35850596  
 H 2.96304107 4.80542517 0.61077899  
 H 3.69893789 2.57953691 1.46339297  
 H 2.24304104 0.61859399 1.19913101  
 H 0.75913101 5.00469780 -0.50541300  
 H -2.27863908 2.09364700 0.48965800  
 H -2.95061707 1.99012804 -1.13769603  
 H -1.49469900 4.05309391 -0.80215001  
 H -0.93997598 3.01667309 -2.10501003  
 H 1.96209598 -3.81542397 -2.36224508  
 H 0.59320098 -2.74613595 -2.70731807  
 H 0.82119697 -3.39506292 -1.07076001  
 H 3.92605090 -2.85506105 -0.84666300  
 H 3.76264691 -1.20023704 -0.24076800  
 H 2.71342492 -2.48839808 0.39120999  
 H 3.59251809 -2.03370690 -3.25312710  
 H 3.48996401 -0.38367000 -2.60814500  
 H 2.18481708 -1.02127099 -3.62622190  
 H -2.21396804 -0.12847300 1.73423004  
 H -3.84441710 -1.88918602 2.34199095  
 H -4.84891701 -3.31474495 0.57652301  
 H -4.21919298 -2.96094894 -1.79758000  
 H -2.60060310 -1.18477201 -2.39581800  
 H -1.13058102 0.48141199 -1.82468903

### S11.2.2. Frequencies

| Mode | IR frequency | IR intensity | Raman intensity |
|------|--------------|--------------|-----------------|
| 1    | -26.89060000 | 1.43020000   | 0.00000000      |
| 2    | 22.29020000  | 0.32750000   | 0.00000000      |
| 3    | 33.45220000  | 0.18200000   | 0.00000000      |
| 4    | 44.15500000  | 0.69710000   | 0.00000000      |
| 5    | 50.98530000  | 1.38770000   | 0.00000000      |
| 6    | 71.31290000  | 0.79360000   | 0.00000000      |
| 7    | 109.26020000 | 2.13690000   | 0.00000000      |
| 8    | 136.38180000 | 1.60400000   | 0.00000000      |
| 9    | 153.25360000 | 1.34910000   | 0.00000000      |
| 10   | 175.53900000 | 4.75380000   | 0.00000000      |
| 11   | 187.21900000 | 2.02820000   | 0.00000000      |
| 12   | 204.24170000 | 0.26760000   | 0.00000000      |
| 13   | 226.10770000 | 4.23140000   | 0.00000000      |
| 14   | 247.32390000 | 0.54360000   | 0.00000000      |
| 15   | 253.55030000 | 0.15110000   | 0.00000000      |
| 16   | 267.40770000 | 2.16380000   | 0.00000000      |
| 17   | 269.68280000 | 0.10680000   | 0.00000000      |
| 18   | 288.83710000 | 1.19260000   | 0.00000000      |
| 19   | 321.65320000 | 8.46620000   | 0.00000000      |
| 20   | 354.49900000 | 2.28340000   | 0.00000000      |
| 21   | 358.14600000 | 3.87650000   | 0.00000000      |
| 22   | 387.18360000 | 1.93950000   | 0.00000000      |
| 23   | 403.19590000 | 5.81520000   | 0.00000000      |
| 24   | 416.14900000 | 0.40890000   | 0.00000000      |
| 25   | 433.96230000 | 1.40290000   | 0.00000000      |
| 26   | 462.05240000 | 14.22680000  | 0.00000000      |
| 27   | 469.81600000 | 7.35540000   | 0.00000000      |
| 28   | 486.52620000 | 1.14660000   | 0.00000000      |
| 29   | 500.33860000 | 14.95930000  | 0.00000000      |
| 30   | 537.32140000 | 9.19330000   | 0.00000000      |

|    |               |              |            |
|----|---------------|--------------|------------|
| 31 | 554.1870000   | 9.77820000   | 0.00000000 |
| 32 | 565.10950000  | 0.61940000   | 0.00000000 |
| 33 | 614.70950000  | 1.84760000   | 0.00000000 |
| 34 | 635.81910000  | 0.75620000   | 0.00000000 |
| 35 | 650.05510000  | 8.73460000   | 0.00000000 |
| 36 | 677.84860000  | 4.41140000   | 0.00000000 |
| 37 | 714.26300000  | 62.41720000  | 0.00000000 |
| 38 | 732.89810000  | 14.94910000  | 0.00000000 |
| 39 | 758.50720000  | 68.18770000  | 0.00000000 |
| 40 | 760.26690000  | 15.63470000  | 0.00000000 |
| 41 | 775.40890000  | 44.63900000  | 0.00000000 |
| 42 | 783.38530000  | 15.15730000  | 0.00000000 |
| 43 | 803.10310000  | 3.75430000   | 0.00000000 |
| 44 | 827.59350000  | 14.85260000  | 0.00000000 |
| 45 | 854.02120000  | 34.14730000  | 0.00000000 |
| 46 | 855.75280000  | 32.00790000  | 0.00000000 |
| 47 | 858.77770000  | 5.45720000   | 0.00000000 |
| 48 | 868.07420000  | 0.75310000   | 0.00000000 |
| 49 | 907.42890000  | 2.77570000   | 0.00000000 |
| 50 | 929.08040000  | 6.67810000   | 0.00000000 |
| 51 | 931.16500000  | 0.26700000   | 0.00000000 |
| 52 | 932.79710000  | 0.16250000   | 0.00000000 |
| 53 | 949.68130000  | 3.07920000   | 0.00000000 |
| 54 | 963.34790000  | 5.82550000   | 0.00000000 |
| 55 | 972.22950000  | 0.19540000   | 0.00000000 |
| 56 | 981.53220000  | 0.07900000   | 0.00000000 |
| 57 | 986.47330000  | 0.15940000   | 0.00000000 |
| 58 | 1006.80770000 | 1.95470000   | 0.00000000 |
| 59 | 1016.08340000 | 36.65940000  | 0.00000000 |
| 60 | 1021.47820000 | 6.27740000   | 0.00000000 |
| 61 | 1038.92300000 | 11.80990000  | 0.00000000 |
| 62 | 1049.57290000 | 7.13620000   | 0.00000000 |
| 63 | 1051.79010000 | 0.78590000   | 0.00000000 |
| 64 | 1059.06710000 | 0.86960000   | 0.00000000 |
| 65 | 1068.23020000 | 19.09850000  | 0.00000000 |
| 66 | 1077.18450000 | 11.39500000  | 0.00000000 |
| 67 | 1104.02600000 | 18.86920000  | 0.00000000 |
| 68 | 1119.74620000 | 66.86910000  | 0.00000000 |
| 69 | 1140.34410000 | 297.26020000 | 0.00000000 |
| 70 | 1164.01170000 | 570.49840000 | 0.00000000 |
| 71 | 1176.81300000 | 0.39090000   | 0.00000000 |
| 72 | 1182.16480000 | 21.88560000  | 0.00000000 |
| 73 | 1193.43020000 | 15.23020000  | 0.00000000 |
| 74 | 1197.27980000 | 9.67960000   | 0.00000000 |
| 75 | 1217.17030000 | 1.20530000   | 0.00000000 |
| 76 | 1225.32650000 | 4.27110000   | 0.00000000 |
| 77 | 1240.43090000 | 74.08130000  | 0.00000000 |
| 78 | 1248.49310000 | 194.08910000 | 0.00000000 |
| 79 | 1271.89250000 | 32.83100000  | 0.00000000 |
| 80 | 1284.69740000 | 16.54940000  | 0.00000000 |
| 81 | 1295.78110000 | 195.24400000 | 0.00000000 |
| 82 | 1309.48220000 | 97.42370000  | 0.00000000 |
| 83 | 1320.18980000 | 20.96950000  | 0.00000000 |
| 84 | 1338.99530000 | 66.26380000  | 0.00000000 |
| 85 | 1347.04320000 | 7.34010000   | 0.00000000 |
| 86 | 1350.82040000 | 2.79050000   | 0.00000000 |
| 87 | 1374.48190000 | 11.13860000  | 0.00000000 |
| 88 | 1382.07920000 | 5.13830000   | 0.00000000 |
| 89 | 1397.18290000 | 27.01670000  | 0.00000000 |
| 90 | 1399.72820000 | 21.18910000  | 0.00000000 |
| 91 | 1401.14900000 | 29.90330000  | 0.00000000 |
| 92 | 1422.36030000 | 20.01150000  | 0.00000000 |
| 93 | 1467.52680000 | 0.41850000   | 0.00000000 |
| 94 | 1475.07400000 | 13.07250000  | 0.00000000 |

|     |               |              |            |
|-----|---------------|--------------|------------|
| 95  | 1482.41690000 | 12.05630000  | 0.00000000 |
| 96  | 1485.22250000 | 1.95630000   | 0.00000000 |
| 97  | 1485.32360000 | 1.61220000   | 0.00000000 |
| 98  | 1486.98850000 | 36.80970000  | 0.00000000 |
| 99  | 1489.15820000 | 24.68290000  | 0.00000000 |
| 100 | 1491.10870000 | 9.05100000   | 0.00000000 |
| 101 | 1498.83910000 | 1.90220000   | 0.00000000 |
| 102 | 1519.56740000 | 21.57640000  | 0.00000000 |
| 103 | 1527.44540000 | 36.27140000  | 0.00000000 |
| 104 | 1528.34820000 | 120.50750000 | 0.00000000 |
| 105 | 1619.62560000 | 65.21390000  | 0.00000000 |
| 106 | 1629.88570000 | 1.11350000   | 0.00000000 |
| 107 | 1646.48670000 | 49.84060000  | 0.00000000 |
| 108 | 1647.74390000 | 5.87480000   | 0.00000000 |
| 109 | 1780.38830000 | 544.09140000 | 0.00000000 |
| 110 | 2976.58000000 | 46.07240000  | 0.00000000 |
| 111 | 3009.74480000 | 44.13780000  | 0.00000000 |
| 112 | 3038.56510000 | 13.77420000  | 0.00000000 |
| 113 | 3041.40170000 | 33.28090000  | 0.00000000 |
| 114 | 3043.26990000 | 30.49710000  | 0.00000000 |
| 115 | 3047.25660000 | 15.89190000  | 0.00000000 |
| 116 | 3067.55890000 | 48.99490000  | 0.00000000 |
| 117 | 3093.85990000 | 40.57400000  | 0.00000000 |
| 118 | 3103.73560000 | 10.54510000  | 0.00000000 |
| 119 | 3106.03100000 | 20.18890000  | 0.00000000 |
| 120 | 3112.13820000 | 45.01950000  | 0.00000000 |
| 121 | 3116.54130000 | 62.61980000  | 0.00000000 |
| 122 | 3140.01600000 | 5.30450000   | 0.00000000 |
| 123 | 3143.94430000 | 21.24220000  | 0.00000000 |
| 124 | 3155.78840000 | 18.17590000  | 0.00000000 |
| 125 | 3158.51530000 | 9.55950000   | 0.00000000 |
| 126 | 3166.46210000 | 0.42430000   | 0.00000000 |
| 127 | 3167.44180000 | 7.75240000   | 0.00000000 |
| 128 | 3175.89490000 | 29.59680000  | 0.00000000 |
| 129 | 3179.53520000 | 33.02180000  | 0.00000000 |
| 130 | 3185.64250000 | 43.88140000  | 0.00000000 |
| 131 | 3191.68990000 | 30.48990000  | 0.00000000 |
| 132 | 3192.76850000 | 14.43210000  | 0.00000000 |

## S11.3. 2a, BOC GROUP POINTING TO PHENYL

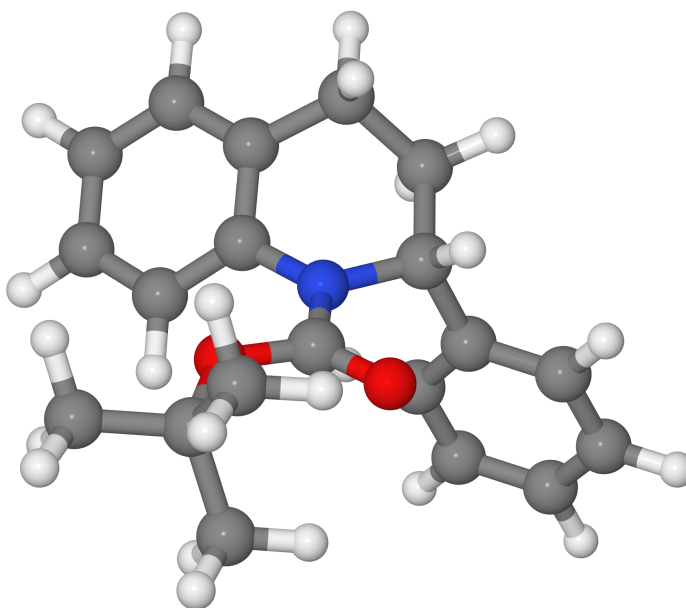

```

Route                : # opt freq b3lyp/6-311g(d,p) scrf=(solvent=thf)
                    : geom=connectivity empiricaldispersion=gd3bj int=ultrafine
                    : pop=(regular,mk)
SMILES               : CC(C)(C)OC(=O)N1c2ccccc2CCC1c3ccccc3
Formula              : C20H23NO2
Charge               : 0
Multiplicity         : 1
Dipole               : 4.8944                                     Debye
Energy               : -981.57837288                             a.u.
Gibbs Energy         : -981.24209400                             a.u.
Number of imaginary frequencies : 0

```

## S11.3.1. Cartesian Co-ordinates (XYZ format)

46

```

C  1.44592595  3.84447098  1.39000905
C  1.66128397  2.61798096  2.01641893
C  1.19952095  1.44068301  1.43597901
C  0.54170901  1.48535097  0.20494799
C  0.30520299  2.71642208 -0.42461699
C  0.75604302  3.88761497  0.18073399
N  0.04188000  0.32038099 -0.44322500
C -1.29048204  0.34786901 -1.10160506
C -1.73722994  1.79296100 -1.38767099
C -0.52670902  2.68932390 -1.67636895
C  0.75011498 -0.85074699 -0.60641903
O  0.28426600 -1.82422805 -1.17194700
O  1.98832202 -0.76325798 -0.09778700
C  2.91651893 -1.91096199 -0.13307200
C  3.23844790 -2.27500892 -1.58126998
C  2.32652903 -3.08322191  0.64854598
C  4.14882898 -1.35289502  0.57312399

```

C -2.32401490 -0.40746701 -0.28893200  
 C -2.45650101 -0.17926200 1.08380997  
 C -3.42860603 -0.84974301 1.82037497  
 C -4.28567314 -1.75320005 1.19167399  
 C -4.15898085 -1.98467898 -0.17594700  
 C -3.17945504 -1.31696606 -0.90927100  
 H 1.80068803 4.76077414 1.84673703  
 H 2.18045998 2.57532191 2.96672702  
 H 1.35896802 0.49031401 1.92388701  
 H 0.56223601 4.83886909 -0.30306399  
 H -2.27369499 2.19613004 -0.52486002  
 H -2.43899012 1.77001500 -2.22385693  
 H -0.83981901 3.69681692 -1.95523500  
 H 0.04652100 2.27636099 -2.51520300  
 H 4.02524805 -3.03301692 -1.59716904  
 H 3.59978604 -1.39474106 -2.11822796  
 H 2.36023593 -2.66649508 -2.09037495  
 H 3.07260203 -3.87778902 0.72378498  
 H 2.06117392 -2.76630712 1.65999699  
 H 1.44006395 -3.47677994 0.15557501  
 H 4.93203306 -2.11283493 0.60900402  
 H 3.90301609 -1.05603099 1.59465301  
 H 4.53136110 -0.48039100 0.04003600  
 H -1.79163599 0.51960301 1.57848501  
 H -3.51834393 -0.66796798 2.88532090  
 H -5.04232693 -2.27563095 1.76538002  
 H -4.81499100 -2.69166899 -0.67080498  
 H -3.06935191 -1.51179695 -1.97046304  
 H -1.16180301 -0.16777600 -2.05295300

### S11.3.2. Frequencies

| Mode | IR frequency | IR intensity | Raman intensity |
|------|--------------|--------------|-----------------|
| 1    | 11.58310000  | 0.20930000   | 0.00000000      |
| 2    | 18.68490000  | 0.57000000   | 0.00000000      |
| 3    | 26.22490000  | 0.20780000   | 0.00000000      |
| 4    | 35.57710000  | 0.57800000   | 0.00000000      |
| 5    | 66.28910000  | 2.01350000   | 0.00000000      |
| 6    | 80.26720000  | 0.52330000   | 0.00000000      |
| 7    | 107.69510000 | 1.41270000   | 0.00000000      |
| 8    | 131.76650000 | 1.24050000   | 0.00000000      |
| 9    | 163.75600000 | 1.51100000   | 0.00000000      |
| 10   | 167.75530000 | 2.93100000   | 0.00000000      |
| 11   | 207.21260000 | 0.33940000   | 0.00000000      |
| 12   | 215.16890000 | 0.85470000   | 0.00000000      |
| 13   | 227.33460000 | 6.56570000   | 0.00000000      |
| 14   | 240.39490000 | 1.30660000   | 0.00000000      |
| 15   | 247.37610000 | 0.17750000   | 0.00000000      |
| 16   | 271.31590000 | 0.09970000   | 0.00000000      |
| 17   | 279.74030000 | 0.18360000   | 0.00000000      |
| 18   | 313.15810000 | 4.84980000   | 0.00000000      |
| 19   | 328.68970000 | 11.31270000  | 0.00000000      |
| 20   | 351.02460000 | 2.42180000   | 0.00000000      |
| 21   | 366.26170000 | 2.65900000   | 0.00000000      |
| 22   | 391.60920000 | 8.06820000   | 0.00000000      |
| 23   | 411.31010000 | 1.61340000   | 0.00000000      |
| 24   | 413.70560000 | 0.47000000   | 0.00000000      |
| 25   | 430.32450000 | 3.48960000   | 0.00000000      |
| 26   | 458.54710000 | 4.28960000   | 0.00000000      |
| 27   | 472.16970000 | 3.06320000   | 0.00000000      |
| 28   | 477.78600000 | 12.96580000  | 0.00000000      |
| 29   | 504.98440000 | 9.78230000   | 0.00000000      |



|    |               |              |            |
|----|---------------|--------------|------------|
| 30 | 546.05590000  | 19.15740000  | 0.00000000 |
| 31 | 556.02220000  | 0.68850000   | 0.00000000 |
| 32 | 570.74920000  | 7.71530000   | 0.00000000 |
| 33 | 625.31120000  | 4.95890000   | 0.00000000 |
| 34 | 638.04810000  | 1.91520000   | 0.00000000 |
| 35 | 647.34240000  | 4.74240000   | 0.00000000 |
| 36 | 693.68390000  | 7.35140000   | 0.00000000 |
| 37 | 714.90240000  | 64.07870000  | 0.00000000 |
| 38 | 752.13200000  | 57.89880000  | 0.00000000 |
| 39 | 757.46950000  | 6.75190000   | 0.00000000 |
| 40 | 770.12620000  | 16.79070000  | 0.00000000 |
| 41 | 772.50580000  | 37.46440000  | 0.00000000 |
| 42 | 782.67130000  | 44.32070000  | 0.00000000 |
| 43 | 794.13310000  | 7.68010000   | 0.00000000 |
| 44 | 821.33780000  | 6.61540000   | 0.00000000 |
| 45 | 841.92320000  | 2.88740000   | 0.00000000 |
| 46 | 857.15820000  | 0.22690000   | 0.00000000 |
| 47 | 869.19500000  | 67.42940000  | 0.00000000 |
| 48 | 879.29570000  | 2.27210000   | 0.00000000 |
| 49 | 911.15200000  | 12.75190000  | 0.00000000 |
| 50 | 928.35120000  | 0.18330000   | 0.00000000 |
| 51 | 929.06000000  | 3.98300000   | 0.00000000 |
| 52 | 930.92710000  | 0.20930000   | 0.00000000 |
| 53 | 945.32630000  | 11.33710000  | 0.00000000 |
| 54 | 957.33520000  | 3.00240000   | 0.00000000 |
| 55 | 971.57040000  | 0.23430000   | 0.00000000 |
| 56 | 983.57670000  | 0.14280000   | 0.00000000 |
| 57 | 989.98300000  | 0.00470000   | 0.00000000 |
| 58 | 1004.18410000 | 0.35570000   | 0.00000000 |
| 59 | 1019.56490000 | 0.18250000   | 0.00000000 |
| 60 | 1025.99040000 | 9.40710000   | 0.00000000 |
| 61 | 1041.97780000 | 83.53590000  | 0.00000000 |
| 62 | 1050.78110000 | 9.14730000   | 0.00000000 |
| 63 | 1052.56870000 | 0.54480000   | 0.00000000 |
| 64 | 1057.78930000 | 4.82150000   | 0.00000000 |
| 65 | 1066.27060000 | 9.56140000   | 0.00000000 |
| 66 | 1069.25130000 | 48.18410000  | 0.00000000 |
| 67 | 1105.00520000 | 16.86470000  | 0.00000000 |
| 68 | 1135.97250000 | 56.45240000  | 0.00000000 |
| 69 | 1143.76430000 | 101.68400000 | 0.00000000 |
| 70 | 1176.94680000 | 0.91850000   | 0.00000000 |
| 71 | 1179.49230000 | 1.51930000   | 0.00000000 |
| 72 | 1186.49170000 | 458.10130000 | 0.00000000 |
| 73 | 1193.95710000 | 50.40380000  | 0.00000000 |
| 74 | 1199.78670000 | 6.50130000   | 0.00000000 |
| 75 | 1213.80960000 | 5.72580000   | 0.00000000 |
| 76 | 1222.56830000 | 7.26170000   | 0.00000000 |
| 77 | 1234.84400000 | 20.80580000  | 0.00000000 |
| 78 | 1268.97400000 | 23.22830000  | 0.00000000 |
| 79 | 1276.23100000 | 197.88090000 | 0.00000000 |
| 80 | 1283.68970000 | 29.26000000  | 0.00000000 |
| 81 | 1302.07260000 | 3.05790000   | 0.00000000 |
| 82 | 1316.65250000 | 79.33130000  | 0.00000000 |
| 83 | 1337.27250000 | 14.90990000  | 0.00000000 |
| 84 | 1341.18290000 | 88.51140000  | 0.00000000 |
| 85 | 1354.26530000 | 44.01240000  | 0.00000000 |
| 86 | 1358.85700000 | 508.93480000 | 0.00000000 |
| 87 | 1360.47710000 | 6.65800000   | 0.00000000 |
| 88 | 1384.24770000 | 67.53290000  | 0.00000000 |
| 89 | 1394.83130000 | 31.23290000  | 0.00000000 |
| 90 | 1398.00290000 | 56.45610000  | 0.00000000 |
| 91 | 1417.39030000 | 32.62130000  | 0.00000000 |
| 92 | 1420.89580000 | 13.08740000  | 0.00000000 |
| 93 | 1466.92810000 | 0.45030000   | 0.00000000 |

|     |               |              |            |
|-----|---------------|--------------|------------|
| 94  | 1478.29110000 | 10.96050000  | 0.00000000 |
| 95  | 1484.45670000 | 2.63280000   | 0.00000000 |
| 96  | 1485.58860000 | 0.17260000   | 0.00000000 |
| 97  | 1487.15300000 | 4.80410000   | 0.00000000 |
| 98  | 1488.19890000 | 42.09070000  | 0.00000000 |
| 99  | 1494.06580000 | 13.99930000  | 0.00000000 |
| 100 | 1494.64130000 | 15.73290000  | 0.00000000 |
| 101 | 1499.16870000 | 1.79290000   | 0.00000000 |
| 102 | 1518.93770000 | 21.74520000  | 0.00000000 |
| 103 | 1523.30890000 | 135.78700000 | 0.00000000 |
| 104 | 1528.49860000 | 20.10550000  | 0.00000000 |
| 105 | 1622.73020000 | 29.76510000  | 0.00000000 |
| 106 | 1628.93400000 | 1.97750000   | 0.00000000 |
| 107 | 1646.49860000 | 25.18730000  | 0.00000000 |
| 108 | 1646.85400000 | 13.01160000  | 0.00000000 |
| 109 | 1724.70250000 | 667.69180000 | 0.00000000 |
| 110 | 3014.31070000 | 40.02440000  | 0.00000000 |
| 111 | 3037.32770000 | 15.88130000  | 0.00000000 |
| 112 | 3038.15180000 | 34.60350000  | 0.00000000 |
| 113 | 3045.42930000 | 26.34620000  | 0.00000000 |
| 114 | 3046.24300000 | 28.53870000  | 0.00000000 |
| 115 | 3079.51190000 | 2.74600000   | 0.00000000 |
| 116 | 3088.91270000 | 44.73240000  | 0.00000000 |
| 117 | 3097.49050000 | 57.17880000  | 0.00000000 |
| 118 | 3099.91120000 | 10.63980000  | 0.00000000 |
| 119 | 3101.99580000 | 32.02130000  | 0.00000000 |
| 120 | 3110.86680000 | 47.06160000  | 0.00000000 |
| 121 | 3115.23910000 | 66.80430000  | 0.00000000 |
| 122 | 3143.08510000 | 0.88320000   | 0.00000000 |
| 123 | 3146.09250000 | 25.52490000  | 0.00000000 |
| 124 | 3160.12150000 | 6.95940000   | 0.00000000 |
| 125 | 3162.73330000 | 7.72360000   | 0.00000000 |
| 126 | 3165.01320000 | 0.37950000   | 0.00000000 |
| 127 | 3173.27450000 | 19.53790000  | 0.00000000 |
| 128 | 3173.56430000 | 21.07100000  | 0.00000000 |
| 129 | 3180.58690000 | 47.40630000  | 0.00000000 |
| 130 | 3188.86540000 | 39.96430000  | 0.00000000 |
| 131 | 3190.48930000 | 24.59870000  | 0.00000000 |
| 132 | 3219.50720000 | 6.60310000   | 0.00000000 |

**S11.4. LITHIATED INTERMEDIATE FROM 2a WITH COORDINATED CHLOROFORMATE AND THF (1<sup>st</sup> ISOMER)**

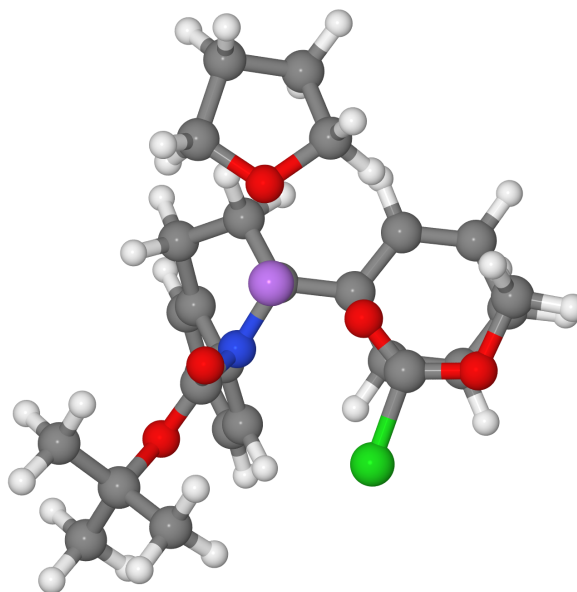

```

Route : # opt freq b3lyp/6-311g(d,p) scrf=(solvent=thf) geom=connectivity empi
       : ricaldispersion=gd3bj int=ultrafine pop=(regular,mk)
SMILES : [Li].CC(C)(C)OC(=O)N1c2ccccc2CC[C]1c3ccccc3.COC(=O)Cl.C1CCOC1
Formula : C26H33ClLiNO5
Charge : 0
Multiplicity : 1
Dipole : 18.0608
Energy : -1909.89325350
Gibbs Energy : -1909.41809300
Number of imaginary frequencies : 0

```

Debye  
a.u.  
a.u.

**S11.4.1. Cartesian Co-ordinates (XYZ format)**

67

```

C -4.07383013  2.66007996 -2.30114508
C -3.94841290  1.29754901 -2.56836295
C -3.04176903  0.52119201 -1.84725201
C -2.27803612  1.11972296 -0.85069799
C -2.39692307  2.48757601 -0.56652302
C -3.29442501  3.25304389 -1.30576003
N -1.25627196  0.44973800 -0.10966800
C  0.06172200  1.10441196 -0.15597200
C -0.03283300  2.58138204  0.24463400
C -1.49518001  3.00662303  0.51836902
C -1.51689100 -0.51371503  0.80501002
O -0.65612501 -0.97798300  1.56506300
O -2.79455590 -0.91212499  0.79110402
C -3.28969097 -1.99696100  1.66164601
C -3.15724897 -1.59054899  3.12814999
C -2.55345893 -3.29722905  1.34519601
C -4.75780106 -2.09102392  1.25549901

```

C 0.83341402 0.76648498 -1.32210803  
Li 1.10852802 -0.23281500 1.31437898  
C 0.56074703 -0.37931100 -2.12364411  
C 1.34992802 -0.72311199 -3.21091008  
C 2.45817900 0.04750000 -3.57888794  
C 2.75129795 1.17750895 -2.81072807  
C 1.97259402 1.52886498 -1.71484101  
H -4.77399302 3.26148605 -2.86949611  
H -4.55025578 0.83881903 -3.34449697  
H -2.93142700 -0.53661799 -2.04708505  
H -3.38906789 4.31408024 -1.09948599  
H 0.34783000 3.21153092 -0.57064402  
H 0.56688100 2.83807707 1.12628400  
H -1.57307506 4.09198380 0.61091697  
H -1.81348002 2.57629991 1.47621500  
H -3.65694094 -2.33277392 3.75536799  
H -3.63704300 -0.62310702 3.29441190  
H -2.11200595 -1.52495694 3.42316699  
H -3.02357101 -4.11961889 1.88979900  
H -2.61600590 -3.51438093 0.27616999  
H -1.50606096 -3.23460507 1.63148606  
H -5.25581503 -2.86787391 1.83914804  
H -4.84518909 -2.33869505 0.19583200  
H -5.26422215 -1.14023304 1.43273997  
H -0.29239899 -0.99675900 -1.87335896  
H 1.09508002 -1.60865903 -3.78534389  
H 3.07170701 -0.22584100 -4.42894077  
H 3.60539889 1.79726100 -3.06840110  
H 2.24768710 2.40609908 -1.14149404  
C 2.23067904 -2.44876099 -0.37994999  
O 2.26373005 -1.55964506 0.42416701  
O 3.14856100 -2.77210903 -1.24940503  
C 4.30939817 -1.88432395 -1.28820002  
H 3.97843289 -0.88816297 -1.57230794  
H 4.79372501 -1.88204896 -0.31330201  
H 4.95514011 -2.31343389 -2.04731798  
O 2.42474508 0.69815600 2.39082909  
C 3.57588506 1.20917296 1.67329895  
C 2.02230906 1.63864696 3.41977596  
C 3.56453300 2.70981693 1.92799497  
H 4.47979212 0.73906201 2.07476306  
H 3.46210599 0.93583000 0.62475097  
C 3.03693700 2.78459001 3.36831903  
H 1.00908601 1.97689795 3.18689489  
H 2.01029801 1.11884403 4.37925911  
H 2.87590909 3.20330596 1.23844600  
H 4.55188513 3.15813303 1.81120098  
H 2.58072996 3.74561596 3.60748911  
H 3.84977293 2.60665202 4.07663822  
Cl 0.86999100 -3.57337499 -0.48684001

## S11.4.2. Frequencies

| Mode | IR frequency | IR intensity | Raman intensity |
|------|--------------|--------------|-----------------|
| 1    | 4.42270000   | 0.80260000   | 0.00000000      |
| 2    | 16.33360000  | 1.12960000   | 0.00000000      |
| 3    | 22.75280000  | 0.55600000   | 0.00000000      |
| 4    | 27.78000000  | 1.45600000   | 0.00000000      |
| 5    | 34.50340000  | 0.80450000   | 0.00000000      |
| 6    | 37.35250000  | 0.69840000   | 0.00000000      |
| 7    | 39.26580000  | 1.32280000   | 0.00000000      |
| 8    | 44.69480000  | 1.70460000   | 0.00000000      |
| 9    | 51.00280000  | 0.16740000   | 0.00000000      |
| 10   | 57.56080000  | 0.71610000   | 0.00000000      |
| 11   | 67.11390000  | 2.46590000   | 0.00000000      |
| 12   | 75.95190000  | 1.88060000   | 0.00000000      |
| 13   | 77.55670000  | 1.31700000   | 0.00000000      |
| 14   | 87.16620000  | 6.10480000   | 0.00000000      |
| 15   | 91.11380000  | 2.82770000   | 0.00000000      |
| 16   | 94.75370000  | 2.04050000   | 0.00000000      |
| 17   | 104.23590000 | 0.98250000   | 0.00000000      |
| 18   | 115.31620000 | 1.41570000   | 0.00000000      |
| 19   | 124.35740000 | 1.69890000   | 0.00000000      |
| 20   | 145.29970000 | 5.43270000   | 0.00000000      |
| 21   | 148.27340000 | 1.80890000   | 0.00000000      |
| 22   | 153.60820000 | 2.06360000   | 0.00000000      |
| 23   | 168.09090000 | 0.53210000   | 0.00000000      |
| 24   | 179.27260000 | 2.35880000   | 0.00000000      |
| 25   | 185.90950000 | 7.12710000   | 0.00000000      |
| 26   | 206.84520000 | 0.22000000   | 0.00000000      |
| 27   | 208.84600000 | 0.24540000   | 0.00000000      |
| 28   | 223.33740000 | 9.53690000   | 0.00000000      |
| 29   | 246.53180000 | 0.07070000   | 0.00000000      |
| 30   | 259.28380000 | 1.25970000   | 0.00000000      |
| 31   | 262.15710000 | 0.81130000   | 0.00000000      |
| 32   | 268.13340000 | 0.39790000   | 0.00000000      |
| 33   | 268.97240000 | 12.66210000  | 0.00000000      |
| 34   | 274.07130000 | 1.73740000   | 0.00000000      |
| 35   | 310.35920000 | 24.01480000  | 0.00000000      |
| 36   | 328.21330000 | 0.53010000   | 0.00000000      |
| 37   | 349.10690000 | 9.47230000   | 0.00000000      |
| 38   | 352.32820000 | 33.29760000  | 0.00000000      |
| 39   | 380.67260000 | 45.07900000  | 0.00000000      |
| 40   | 401.20170000 | 31.36930000  | 0.00000000      |
| 41   | 412.31750000 | 56.33070000  | 0.00000000      |
| 42   | 423.39160000 | 87.52450000  | 0.00000000      |
| 43   | 431.23790000 | 10.23420000  | 0.00000000      |
| 44   | 433.32330000 | 4.82340000   | 0.00000000      |
| 45   | 449.13060000 | 6.09230000   | 0.00000000      |
| 46   | 456.02350000 | 11.61510000  | 0.00000000      |
| 47   | 460.07560000 | 37.15990000  | 0.00000000      |
| 48   | 477.82490000 | 13.33020000  | 0.00000000      |
| 49   | 481.49560000 | 19.57760000  | 0.00000000      |
| 50   | 500.97310000 | 23.17990000  | 0.00000000      |
| 51   | 532.13300000 | 193.86880000 | 0.00000000      |
| 52   | 538.80000000 | 7.78150000   | 0.00000000      |
| 53   | 553.18520000 | 58.51090000  | 0.00000000      |
| 54   | 574.42270000 | 4.91340000   | 0.00000000      |
| 55   | 583.81280000 | 2.42850000   | 0.00000000      |
| 56   | 603.06340000 | 25.81750000  | 0.00000000      |
| 57   | 635.09300000 | 0.10340000   | 0.00000000      |
| 58   | 647.77160000 | 1.33620000   | 0.00000000      |
| 59   | 673.11160000 | 76.91920000  | 0.00000000      |
| 60   | 690.39230000 | 42.65060000  | 0.00000000      |

|     |               |              |            |
|-----|---------------|--------------|------------|
| 61  | 691.67160000  | 33.15230000  | 0.00000000 |
| 62  | 712.76830000  | 65.01050000  | 0.00000000 |
| 63  | 728.70140000  | 22.61710000  | 0.00000000 |
| 64  | 748.45110000  | 75.87020000  | 0.00000000 |
| 65  | 753.88210000  | 41.64660000  | 0.00000000 |
| 66  | 769.31920000  | 6.37980000   | 0.00000000 |
| 67  | 778.74720000  | 28.40060000  | 0.00000000 |
| 68  | 790.25170000  | 17.06670000  | 0.00000000 |
| 69  | 810.13240000  | 2.93640000   | 0.00000000 |
| 70  | 828.27820000  | 10.89250000  | 0.00000000 |
| 71  | 841.49400000  | 80.40690000  | 0.00000000 |
| 72  | 843.41680000  | 100.51010000 | 0.00000000 |
| 73  | 844.44260000  | 3.67450000   | 0.00000000 |
| 74  | 859.30490000  | 27.44690000  | 0.00000000 |
| 75  | 874.02060000  | 23.75410000  | 0.00000000 |
| 76  | 875.28660000  | 1.76280000   | 0.00000000 |
| 77  | 890.99190000  | 62.84230000  | 0.00000000 |
| 78  | 896.48490000  | 25.85930000  | 0.00000000 |
| 79  | 902.38570000  | 29.82940000  | 0.00000000 |
| 80  | 917.04300000  | 13.40170000  | 0.00000000 |
| 81  | 927.45840000  | 8.78670000   | 0.00000000 |
| 82  | 928.68860000  | 0.10590000   | 0.00000000 |
| 83  | 931.08540000  | 1.24550000   | 0.00000000 |
| 84  | 944.88010000  | 2.50250000   | 0.00000000 |
| 85  | 946.14530000  | 2.39690000   | 0.00000000 |
| 86  | 953.03850000  | 5.16520000   | 0.00000000 |
| 87  | 962.68060000  | 0.18490000   | 0.00000000 |
| 88  | 971.03990000  | 0.20470000   | 0.00000000 |
| 89  | 973.53010000  | 2.31070000   | 0.00000000 |
| 90  | 976.01850000  | 1.18390000   | 0.00000000 |
| 91  | 985.27060000  | 0.46920000   | 0.00000000 |
| 92  | 989.17090000  | 68.21710000  | 0.00000000 |
| 93  | 1008.93180000 | 39.66400000  | 0.00000000 |
| 94  | 1040.79190000 | 27.66140000  | 0.00000000 |
| 95  | 1042.63330000 | 9.19280000   | 0.00000000 |
| 96  | 1043.64380000 | 15.92490000  | 0.00000000 |
| 97  | 1051.65870000 | 0.82610000   | 0.00000000 |
| 98  | 1054.79200000 | 8.07850000   | 0.00000000 |
| 99  | 1055.35340000 | 131.42810000 | 0.00000000 |
| 100 | 1059.35070000 | 2.91920000   | 0.00000000 |
| 101 | 1070.65670000 | 63.45260000  | 0.00000000 |
| 102 | 1102.30840000 | 34.90580000  | 0.00000000 |
| 103 | 1131.63720000 | 109.38720000 | 0.00000000 |
| 104 | 1152.84500000 | 123.02720000 | 0.00000000 |
| 105 | 1167.19310000 | 1.55720000   | 0.00000000 |
| 106 | 1168.50080000 | 3.26680000   | 0.00000000 |
| 107 | 1172.20810000 | 33.57660000  | 0.00000000 |
| 108 | 1173.89330000 | 0.17760000   | 0.00000000 |
| 109 | 1181.94450000 | 315.39650000 | 0.00000000 |
| 110 | 1185.45320000 | 78.97640000  | 0.00000000 |
| 111 | 1187.44350000 | 17.41850000  | 0.00000000 |
| 112 | 1191.87810000 | 321.71960000 | 0.00000000 |
| 113 | 1201.33570000 | 58.00680000  | 0.00000000 |
| 114 | 1207.35670000 | 10.78340000  | 0.00000000 |
| 115 | 1208.84060000 | 3.77380000   | 0.00000000 |
| 116 | 1224.03080000 | 5.39640000   | 0.00000000 |
| 117 | 1234.52560000 | 372.28240000 | 0.00000000 |
| 118 | 1257.39270000 | 0.21860000   | 0.00000000 |
| 119 | 1268.64840000 | 23.67530000  | 0.00000000 |
| 120 | 1270.74330000 | 3.12670000   | 0.00000000 |
| 121 | 1275.74620000 | 227.86690000 | 0.00000000 |
| 122 | 1280.28840000 | 7.94680000   | 0.00000000 |
| 123 | 1306.86010000 | 35.71270000  | 0.00000000 |
| 124 | 1311.51110000 | 46.33560000  | 0.00000000 |

|     |               |              |            |
|-----|---------------|--------------|------------|
| 125 | 1324.37630000 | 23.28310000  | 0.00000000 |
| 126 | 1324.90550000 | 6.21780000   | 0.00000000 |
| 127 | 1341.29900000 | 2.66560000   | 0.00000000 |
| 128 | 1344.34770000 | 13.11360000  | 0.00000000 |
| 129 | 1346.13070000 | 68.76650000  | 0.00000000 |
| 130 | 1359.85480000 | 12.61900000  | 0.00000000 |
| 131 | 1368.75520000 | 28.79970000  | 0.00000000 |
| 132 | 1369.86050000 | 4.06710000   | 0.00000000 |
| 133 | 1394.33220000 | 29.94670000  | 0.00000000 |
| 134 | 1396.92940000 | 57.83410000  | 0.00000000 |
| 135 | 1400.80850000 | 5.50740000   | 0.00000000 |
| 136 | 1413.16060000 | 680.23440000 | 0.00000000 |
| 137 | 1420.82360000 | 74.48720000  | 0.00000000 |
| 138 | 1466.70150000 | 0.23470000   | 0.00000000 |
| 139 | 1470.50470000 | 37.73080000  | 0.00000000 |
| 140 | 1471.88170000 | 3.03820000   | 0.00000000 |
| 141 | 1477.17910000 | 8.49310000   | 0.00000000 |
| 142 | 1477.67370000 | 7.31740000   | 0.00000000 |
| 143 | 1484.16520000 | 15.19560000  | 0.00000000 |
| 144 | 1484.43370000 | 2.85720000   | 0.00000000 |
| 145 | 1484.61660000 | 3.06340000   | 0.00000000 |
| 146 | 1486.72410000 | 3.64460000   | 0.00000000 |
| 147 | 1487.75920000 | 48.10530000  | 0.00000000 |
| 148 | 1490.53470000 | 22.06600000  | 0.00000000 |
| 149 | 1495.46450000 | 10.05050000  | 0.00000000 |
| 150 | 1498.82750000 | 1.15000000   | 0.00000000 |
| 151 | 1502.45570000 | 48.32950000  | 0.00000000 |
| 152 | 1510.83980000 | 150.76850000 | 0.00000000 |
| 153 | 1518.18620000 | 19.26260000  | 0.00000000 |
| 154 | 1519.58130000 | 85.07070000  | 0.00000000 |
| 155 | 1522.01660000 | 17.31450000  | 0.00000000 |
| 156 | 1529.86200000 | 3.09270000   | 0.00000000 |
| 157 | 1571.40620000 | 21.88000000  | 0.00000000 |
| 158 | 1620.15920000 | 78.19900000  | 0.00000000 |
| 159 | 1628.69540000 | 280.22560000 | 0.00000000 |
| 160 | 1639.85620000 | 190.65800000 | 0.00000000 |
| 161 | 1664.30240000 | 596.74340000 | 0.00000000 |
| 162 | 1797.59660000 | 623.15590000 | 0.00000000 |
| 163 | 2974.97500000 | 104.79520000 | 0.00000000 |
| 164 | 2991.69880000 | 67.96090000  | 0.00000000 |
| 165 | 3008.61170000 | 140.93820000 | 0.00000000 |
| 166 | 3021.99730000 | 89.17410000  | 0.00000000 |
| 167 | 3036.94280000 | 13.54730000  | 0.00000000 |
| 168 | 3038.09260000 | 35.62120000  | 0.00000000 |
| 169 | 3041.12010000 | 55.51300000  | 0.00000000 |
| 170 | 3045.18050000 | 24.54740000  | 0.00000000 |
| 171 | 3051.68940000 | 26.28320000  | 0.00000000 |
| 172 | 3058.74810000 | 26.05270000  | 0.00000000 |
| 173 | 3071.22630000 | 39.41680000  | 0.00000000 |
| 174 | 3075.88400000 | 66.16870000  | 0.00000000 |
| 175 | 3086.66350000 | 51.60430000  | 0.00000000 |
| 176 | 3099.69330000 | 9.61980000   | 0.00000000 |
| 177 | 3101.19940000 | 34.53540000  | 0.00000000 |
| 178 | 3105.38140000 | 17.52810000  | 0.00000000 |
| 179 | 3110.63470000 | 22.40440000  | 0.00000000 |
| 180 | 3110.86730000 | 45.29970000  | 0.00000000 |
| 181 | 3115.01150000 | 69.89650000  | 0.00000000 |
| 182 | 3117.18720000 | 65.33060000  | 0.00000000 |
| 183 | 3138.67720000 | 30.51500000  | 0.00000000 |
| 184 | 3143.00480000 | 9.89680000   | 0.00000000 |
| 185 | 3145.06590000 | 31.65450000  | 0.00000000 |
| 186 | 3149.92400000 | 16.99510000  | 0.00000000 |
| 187 | 3157.12220000 | 9.21470000   | 0.00000000 |
| 188 | 3166.04980000 | 2.48850000   | 0.00000000 |

|     |               |             |            |
|-----|---------------|-------------|------------|
| 189 | 3167.92120000 | 22.68670000 | 0.00000000 |
| 190 | 3170.61080000 | 50.30660000 | 0.00000000 |
| 191 | 3178.94720000 | 53.74960000 | 0.00000000 |
| 192 | 3182.82450000 | 51.17360000 | 0.00000000 |
| 193 | 3186.73320000 | 12.03390000 | 0.00000000 |
| 194 | 3193.10610000 | 5.96400000  | 0.00000000 |
| 195 | 3199.01210000 | 14.60190000 | 0.00000000 |



**S11.5. LITHIATED INTERMEDIATE FROM 2a WITH COORDINATED CHLOROFORMATE AND THF (2<sup>nd</sup> ISOMER)**

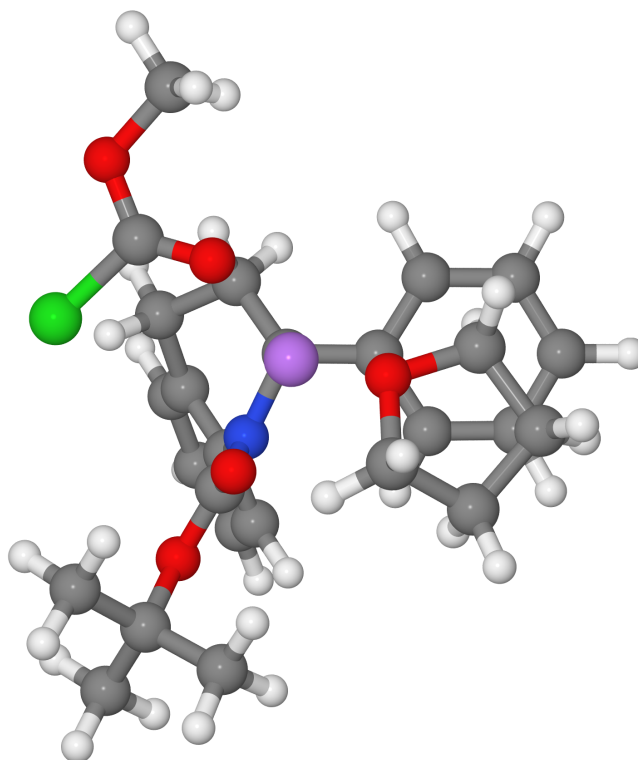

Route : # opt freq b3lyp/6-311g(d,p) scrf=(solvent=thf) geom=connectivity empi  
 : ricaldispersion=gd3bj int=ultrafine pop=(regular,mk)  
 SMILES : [Li].CC(C)(C)OC(=O)N1c2ccccc2CC[C]1c3ccccc3.COC(=O)Cl.C1CCOC1  
 Formula : C<sub>26</sub>H<sub>33</sub>ClLiNO<sub>5</sub>  
 Charge : 0  
 Multiplicity : 1  
 Dipole : 17.6782 Debye  
 Energy : -1909.89232036 a.u.  
 Gibbs Energy : -1909.41351500 a.u.  
 Number of imaginary frequencies : 1 (-9.6 cm<sup>-1</sup>)

**S11.5.1. Cartesian Co-ordinates (XYZ format)**

67

```

C -4.24135208 -1.66082597 -2.72607803
C -3.85209203 -2.46563601 -1.65634000
C -2.80553508 -2.07017303 -0.82433999
C -2.16646791 -0.85726500 -1.06435204
C -2.55028605 -0.03546900 -2.13329792
C -3.58599401 -0.45170900 -2.96542692
N -1.02716899 -0.39389300 -0.33956501
C 0.13565899 -0.03569500 -1.16918802
C -0.24964000 0.93033201 -2.28999805
C -1.76576805 1.23618901 -2.29239607
C -1.03330195 -0.13202900 0.98636699
  
```

|    |             |             |             |
|----|-------------|-------------|-------------|
| O  | -0.05009400 | 0.32150301  | 1.58855104  |
| O  | -2.20074892 | -0.41946599 | 1.57500803  |
| C  | -2.40415597 | -0.25662601 | 3.02794909  |
| C  | -2.25103402 | 1.21302605  | 3.41594005  |
| C  | -1.44754696 | -1.16927302 | 3.79351091  |
| C  | -3.84862089 | -0.71646100 | 3.20454192  |
| C  | 0.98955297  | -1.15118003 | -1.48511899 |
| Li | 1.46612704  | 0.73769802  | 0.46545199  |
| C  | 0.98114699  | -2.36462998 | -0.73752898 |
| C  | 1.86798596  | -3.39742303 | -1.00211000 |
| C  | 2.82043910  | -3.29649901 | -2.02167296 |
| C  | 2.84893298  | -2.12029409 | -2.77524900 |
| C  | 1.96615195  | -1.07782805 | -2.52148890 |
| H  | -5.04993677 | -1.97579706 | -3.37558389 |
| H  | -4.35660410 | -3.40749002 | -1.47353196 |
| H  | -2.49198794 | -2.68849611 | 0.00635600  |
| H  | -3.88484406 | 0.17420000  | -3.79976702 |
| H  | -0.00010900 | 0.48878199  | -3.26440597 |
| H  | 0.29068601  | 1.88751101  | -2.25560308 |
| H  | -2.05269909 | 1.76598203  | -3.20321107 |
| H  | -1.99399602 | 1.89572501  | -1.44746006 |
| H  | -2.54380488 | 1.34274399  | 4.46066380  |
| H  | -2.90356588 | 1.83392298  | 2.79751706  |
| H  | -1.22333705 | 1.54659104  | 3.29052711  |
| H  | -1.70223296 | -1.14974403 | 4.85582113  |
| H  | -1.54328096 | -2.19783711 | 3.43751311  |
| H  | -0.41541201 | -0.84711200 | 3.67303801  |
| H  | -4.13732576 | -0.64112598 | 4.25483704  |
| H  | -3.96118307 | -1.75395095 | 2.88374901  |
| H  | -4.52113295 | -0.09445800 | 2.61080408  |
| H  | 0.26109800  | -2.48024201 | 0.06325100  |
| H  | 1.81742001  | -4.30022383 | -0.40052301 |
| H  | 3.51379299  | -4.10488510 | -2.22032499 |
| H  | 3.57584000  | -2.01053596 | -3.57472301 |
| H  | 2.04142189  | -0.17452800 | -3.11551309 |
| C  | 0.92651200  | 3.53611588  | -0.23574600 |
| O  | 1.69877195  | 2.65491796  | 0.02594900  |
| O  | 1.09099996  | 4.51255512  | -1.08986700 |
| C  | 2.34897208  | 4.49540091  | -1.83218300 |
| H  | 3.18307590  | 4.55622196  | -1.13598001 |
| H  | 2.40569091  | 3.58152103  | -2.42119789 |
| H  | 2.30279803  | 5.37146711  | -2.47020411 |
| Cl | -0.65138501 | 3.66639090  | 0.54273999  |
| O  | 3.05222988  | 0.02541100  | 1.30870700  |
| C  | 3.97956896  | -0.84762001 | 0.60359401  |
| C  | 2.87747407  | -0.47531399 | 2.65106392  |
| C  | 4.13498783  | -2.10878992 | 1.47189701  |
| H  | 3.54324508  | -1.06382501 | -0.36936399 |
| H  | 4.92515182  | -0.31581300 | 0.47106901  |
| C  | 2.99786592  | -1.98409998 | 2.49945903  |
| H  | 3.66606903  | -0.07042500 | 3.29667211  |
| H  | 1.90530705  | -0.13216600 | 3.00003004  |
| H  | 5.10299015  | -2.11109209 | 1.97850704  |
| H  | 4.05710697  | -3.01346707 | 0.87053502  |
| H  | 3.21685910  | -2.48707795 | 3.44259596  |
| H  | 2.06824899  | -2.38557696 | 2.09029007  |

## S11.5.2. Frequencies

| Mode | IR frequency | IR intensity | Raman intensity |
|------|--------------|--------------|-----------------|
| 1    | -9.64570000  | 0.87870000   | 0.00000000      |
| 2    | 13.61020000  | 0.50670000   | 0.00000000      |
| 3    | 18.00780000  | 0.76600000   | 0.00000000      |
| 4    | 27.40750000  | 1.97000000   | 0.00000000      |
| 5    | 31.56740000  | 2.07270000   | 0.00000000      |
| 6    | 36.73820000  | 3.00490000   | 0.00000000      |
| 7    | 38.82220000  | 0.47980000   | 0.00000000      |
| 8    | 43.14640000  | 0.11020000   | 0.00000000      |
| 9    | 52.89830000  | 0.81930000   | 0.00000000      |
| 10   | 60.27200000  | 1.00430000   | 0.00000000      |
| 11   | 70.35300000  | 1.31540000   | 0.00000000      |
| 12   | 74.62880000  | 1.77500000   | 0.00000000      |
| 13   | 83.35560000  | 0.79170000   | 0.00000000      |
| 14   | 87.90070000  | 0.40540000   | 0.00000000      |
| 15   | 94.12460000  | 0.73950000   | 0.00000000      |
| 16   | 108.73620000 | 1.48280000   | 0.00000000      |
| 17   | 113.37920000 | 1.98980000   | 0.00000000      |
| 18   | 116.21900000 | 1.12550000   | 0.00000000      |
| 19   | 128.37240000 | 2.36200000   | 0.00000000      |
| 20   | 136.92800000 | 0.64230000   | 0.00000000      |
| 21   | 142.99400000 | 3.15620000   | 0.00000000      |
| 22   | 159.96340000 | 3.44600000   | 0.00000000      |
| 23   | 166.00170000 | 1.82700000   | 0.00000000      |
| 24   | 170.76200000 | 2.63390000   | 0.00000000      |
| 25   | 181.87110000 | 2.46920000   | 0.00000000      |
| 26   | 204.61650000 | 0.67330000   | 0.00000000      |
| 27   | 206.16450000 | 2.06470000   | 0.00000000      |
| 28   | 222.56100000 | 7.16140000   | 0.00000000      |
| 29   | 244.85960000 | 0.08810000   | 0.00000000      |
| 30   | 263.46420000 | 6.65640000   | 0.00000000      |
| 31   | 265.80830000 | 0.23480000   | 0.00000000      |
| 32   | 268.42270000 | 3.64290000   | 0.00000000      |
| 33   | 273.55070000 | 1.82220000   | 0.00000000      |
| 34   | 289.32710000 | 5.23720000   | 0.00000000      |
| 35   | 314.45120000 | 0.75770000   | 0.00000000      |
| 36   | 327.14400000 | 1.06570000   | 0.00000000      |
| 37   | 350.34960000 | 1.76360000   | 0.00000000      |
| 38   | 362.95370000 | 19.90710000  | 0.00000000      |
| 39   | 394.03660000 | 81.54750000  | 0.00000000      |
| 40   | 400.21810000 | 23.46180000  | 0.00000000      |
| 41   | 419.48340000 | 37.95490000  | 0.00000000      |
| 42   | 423.82530000 | 37.76790000  | 0.00000000      |
| 43   | 426.97400000 | 2.01270000   | 0.00000000      |
| 44   | 446.36260000 | 11.30380000  | 0.00000000      |
| 45   | 454.96880000 | 24.59210000  | 0.00000000      |
| 46   | 459.84280000 | 27.62390000  | 0.00000000      |
| 47   | 469.50730000 | 80.39700000  | 0.00000000      |
| 48   | 480.39290000 | 10.25590000  | 0.00000000      |
| 49   | 482.68230000 | 48.44080000  | 0.00000000      |
| 50   | 494.52180000 | 66.09880000  | 0.00000000      |
| 51   | 504.82780000 | 112.57570000 | 0.00000000      |
| 52   | 537.75670000 | 12.18860000  | 0.00000000      |
| 53   | 547.97950000 | 65.81050000  | 0.00000000      |
| 54   | 574.20130000 | 5.02790000   | 0.00000000      |
| 55   | 589.18100000 | 6.74940000   | 0.00000000      |
| 56   | 602.01510000 | 35.84640000  | 0.00000000      |
| 57   | 634.75130000 | 0.10310000   | 0.00000000      |
| 58   | 645.32320000 | 0.52200000   | 0.00000000      |
| 59   | 687.11720000 | 40.39480000  | 0.00000000      |
| 60   | 690.13960000 | 45.65390000  | 0.00000000      |

|     |               |              |            |
|-----|---------------|--------------|------------|
| 61  | 695.60590000  | 15.85210000  | 0.00000000 |
| 62  | 706.63660000  | 69.53960000  | 0.00000000 |
| 63  | 728.46000000  | 24.65630000  | 0.00000000 |
| 64  | 747.28570000  | 74.13140000  | 0.00000000 |
| 65  | 754.21190000  | 37.51640000  | 0.00000000 |
| 66  | 769.56960000  | 5.86080000   | 0.00000000 |
| 67  | 776.67910000  | 32.29880000  | 0.00000000 |
| 68  | 789.33190000  | 15.14940000  | 0.00000000 |
| 69  | 809.43010000  | 4.72630000   | 0.00000000 |
| 70  | 821.02750000  | 6.12920000   | 0.00000000 |
| 71  | 824.68340000  | 6.41630000   | 0.00000000 |
| 72  | 840.33040000  | 103.25460000 | 0.00000000 |
| 73  | 843.67680000  | 62.94730000  | 0.00000000 |
| 74  | 852.40160000  | 23.45660000  | 0.00000000 |
| 75  | 874.59820000  | 3.11780000   | 0.00000000 |
| 76  | 879.08250000  | 20.49720000  | 0.00000000 |
| 77  | 893.90310000  | 48.35550000  | 0.00000000 |
| 78  | 895.43230000  | 40.98240000  | 0.00000000 |
| 79  | 903.62710000  | 24.31340000  | 0.00000000 |
| 80  | 920.34930000  | 17.26720000  | 0.00000000 |
| 81  | 927.82480000  | 0.06550000   | 0.00000000 |
| 82  | 930.62220000  | 1.93150000   | 0.00000000 |
| 83  | 931.62840000  | 5.54510000   | 0.00000000 |
| 84  | 945.44130000  | 2.24440000   | 0.00000000 |
| 85  | 946.59980000  | 2.54800000   | 0.00000000 |
| 86  | 953.61870000  | 7.52900000   | 0.00000000 |
| 87  | 961.70940000  | 0.25210000   | 0.00000000 |
| 88  | 969.47220000  | 0.29850000   | 0.00000000 |
| 89  | 971.46060000  | 0.82040000   | 0.00000000 |
| 90  | 972.94420000  | 0.53480000   | 0.00000000 |
| 91  | 984.70140000  | 0.34750000   | 0.00000000 |
| 92  | 989.48400000  | 73.04910000  | 0.00000000 |
| 93  | 1011.09690000 | 42.17270000  | 0.00000000 |
| 94  | 1042.86690000 | 19.72410000  | 0.00000000 |
| 95  | 1043.41660000 | 2.74250000   | 0.00000000 |
| 96  | 1044.90760000 | 29.00360000  | 0.00000000 |
| 97  | 1049.87490000 | 1.62950000   | 0.00000000 |
| 98  | 1051.50290000 | 113.28900000 | 0.00000000 |
| 99  | 1055.50820000 | 8.50220000   | 0.00000000 |
| 100 | 1061.17910000 | 4.45340000   | 0.00000000 |
| 101 | 1073.02780000 | 77.82400000  | 0.00000000 |
| 102 | 1102.52080000 | 42.96350000  | 0.00000000 |
| 103 | 1133.11050000 | 109.95690000 | 0.00000000 |
| 104 | 1155.40370000 | 134.96620000 | 0.00000000 |
| 105 | 1159.85420000 | 1.22180000   | 0.00000000 |
| 106 | 1168.89040000 | 12.68010000  | 0.00000000 |
| 107 | 1169.40300000 | 3.56600000   | 0.00000000 |
| 108 | 1174.57570000 | 0.08270000   | 0.00000000 |
| 109 | 1179.65970000 | 418.64270000 | 0.00000000 |
| 110 | 1187.67170000 | 171.98750000 | 0.00000000 |
| 111 | 1191.99990000 | 202.16170000 | 0.00000000 |
| 112 | 1193.93550000 | 17.78540000  | 0.00000000 |
| 113 | 1201.88710000 | 52.12710000  | 0.00000000 |
| 114 | 1211.79740000 | 8.43540000   | 0.00000000 |
| 115 | 1224.88770000 | 24.02600000  | 0.00000000 |
| 116 | 1227.75120000 | 8.37750000   | 0.00000000 |
| 117 | 1228.93210000 | 369.55110000 | 0.00000000 |
| 118 | 1254.17130000 | 3.90120000   | 0.00000000 |
| 119 | 1268.10000000 | 24.61910000  | 0.00000000 |
| 120 | 1277.05060000 | 195.87000000 | 0.00000000 |
| 121 | 1279.39670000 | 44.98380000  | 0.00000000 |
| 122 | 1279.98320000 | 8.47530000   | 0.00000000 |
| 123 | 1308.18560000 | 50.39420000  | 0.00000000 |
| 124 | 1311.45860000 | 32.12720000  | 0.00000000 |

|     |               |              |            |
|-----|---------------|--------------|------------|
| 125 | 1323.91410000 | 2.17410000   | 0.00000000 |
| 126 | 1325.15160000 | 34.79480000  | 0.00000000 |
| 127 | 1338.54730000 | 1.36060000   | 0.00000000 |
| 128 | 1342.13110000 | 14.24500000  | 0.00000000 |
| 129 | 1346.97850000 | 81.60570000  | 0.00000000 |
| 130 | 1359.86400000 | 13.90450000  | 0.00000000 |
| 131 | 1369.03300000 | 23.31150000  | 0.00000000 |
| 132 | 1369.76100000 | 9.08980000   | 0.00000000 |
| 133 | 1393.26890000 | 27.46420000  | 0.00000000 |
| 134 | 1396.59950000 | 40.89540000  | 0.00000000 |
| 135 | 1401.69460000 | 4.93120000   | 0.00000000 |
| 136 | 1418.65540000 | 64.69990000  | 0.00000000 |
| 137 | 1420.88610000 | 690.66430000 | 0.00000000 |
| 138 | 1465.87490000 | 0.21160000   | 0.00000000 |
| 139 | 1470.18720000 | 36.24650000  | 0.00000000 |
| 140 | 1471.62990000 | 4.22020000   | 0.00000000 |
| 141 | 1478.68290000 | 5.04810000   | 0.00000000 |
| 142 | 1479.62610000 | 16.04620000  | 0.00000000 |
| 143 | 1482.08550000 | 16.78760000  | 0.00000000 |
| 144 | 1482.12950000 | 8.05400000   | 0.00000000 |
| 145 | 1483.82800000 | 3.56650000   | 0.00000000 |
| 146 | 1484.87350000 | 3.67670000   | 0.00000000 |
| 147 | 1487.24830000 | 42.86140000  | 0.00000000 |
| 148 | 1490.58710000 | 23.47280000  | 0.00000000 |
| 149 | 1494.71960000 | 16.48990000  | 0.00000000 |
| 150 | 1497.96280000 | 2.90960000   | 0.00000000 |
| 151 | 1506.47540000 | 101.38270000 | 0.00000000 |
| 152 | 1508.63810000 | 13.13800000  | 0.00000000 |
| 153 | 1511.27370000 | 150.23390000 | 0.00000000 |
| 154 | 1518.21550000 | 20.10560000  | 0.00000000 |
| 155 | 1521.05470000 | 96.33110000  | 0.00000000 |
| 156 | 1525.84300000 | 8.75500000   | 0.00000000 |
| 157 | 1571.91100000 | 19.45540000  | 0.00000000 |
| 158 | 1620.41450000 | 92.80330000  | 0.00000000 |
| 159 | 1628.19270000 | 324.96320000 | 0.00000000 |
| 160 | 1640.79270000 | 138.25120000 | 0.00000000 |
| 161 | 1666.55030000 | 651.52630000 | 0.00000000 |
| 162 | 1786.01270000 | 686.67370000 | 0.00000000 |
| 163 | 2955.01050000 | 278.61140000 | 0.00000000 |
| 164 | 2977.45560000 | 58.43200000  | 0.00000000 |
| 165 | 3007.32070000 | 96.70270000  | 0.00000000 |
| 166 | 3022.67970000 | 71.75540000  | 0.00000000 |
| 167 | 3037.31700000 | 13.72810000  | 0.00000000 |
| 168 | 3038.64220000 | 35.69220000  | 0.00000000 |
| 169 | 3041.32370000 | 52.52100000  | 0.00000000 |
| 170 | 3045.66770000 | 24.85370000  | 0.00000000 |
| 171 | 3055.69760000 | 94.08290000  | 0.00000000 |
| 172 | 3058.72610000 | 20.92710000  | 0.00000000 |
| 173 | 3072.29970000 | 17.43390000  | 0.00000000 |
| 174 | 3077.98900000 | 61.68480000  | 0.00000000 |
| 175 | 3100.13220000 | 11.61600000  | 0.00000000 |
| 176 | 3101.28760000 | 30.41290000  | 0.00000000 |
| 177 | 3106.58970000 | 37.75910000  | 0.00000000 |
| 178 | 3111.78410000 | 43.80920000  | 0.00000000 |
| 179 | 3115.33990000 | 67.55890000  | 0.00000000 |
| 180 | 3117.24300000 | 34.18250000  | 0.00000000 |
| 181 | 3129.87310000 | 17.34680000  | 0.00000000 |
| 182 | 3139.04910000 | 29.53540000  | 0.00000000 |
| 183 | 3140.17880000 | 8.34150000   | 0.00000000 |
| 184 | 3143.32230000 | 30.16190000  | 0.00000000 |
| 185 | 3144.51330000 | 6.31510000   | 0.00000000 |
| 186 | 3148.43100000 | 22.86620000  | 0.00000000 |
| 187 | 3157.49220000 | 9.04440000   | 0.00000000 |
| 188 | 3159.98450000 | 11.27020000  | 0.00000000 |

|     |               |             |            |
|-----|---------------|-------------|------------|
| 189 | 3168.10450000 | 23.98290000 | 0.00000000 |
| 190 | 3168.55530000 | 47.36120000 | 0.00000000 |
| 191 | 3175.31610000 | 54.36170000 | 0.00000000 |
| 192 | 3182.54350000 | 20.98930000 | 0.00000000 |
| 193 | 3183.33190000 | 53.10150000 | 0.00000000 |
| 194 | 3196.43110000 | 6.77030000  | 0.00000000 |
| 195 | 3200.77280000 | 12.94720000 | 0.00000000 |

S11.6. LITHIATED INTERMEDIATE FROM 2a WITH COORDINATED CYANOFORMATE AND THF  
(1<sup>st</sup> ISOMER)

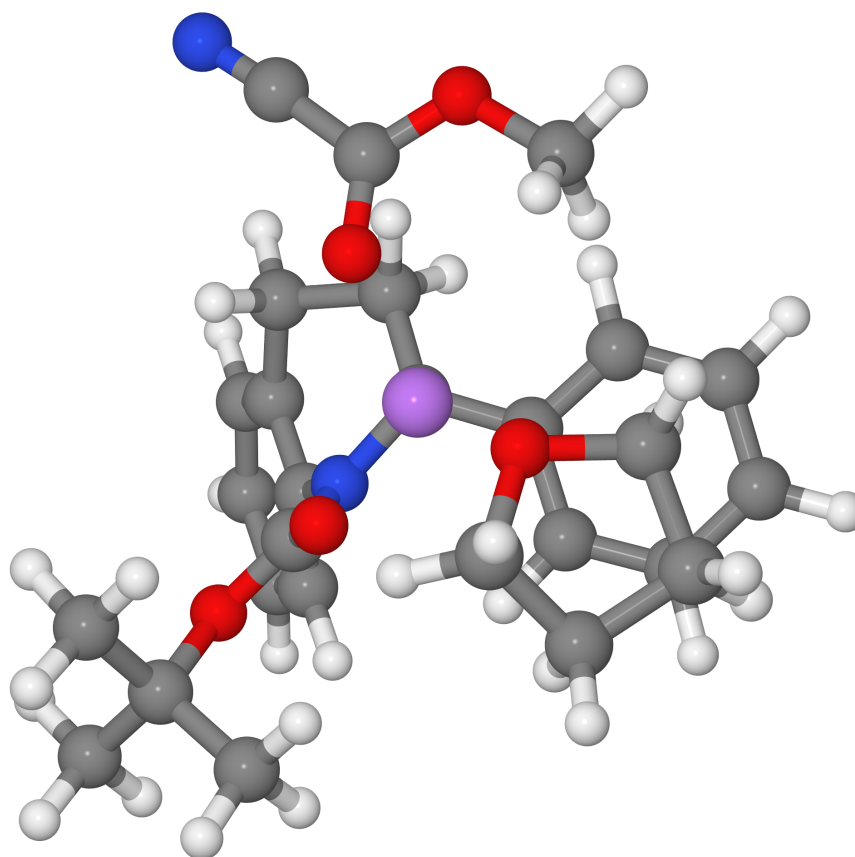

```

Route : # opt freq b3lyp/6-311g(d,p) scrf=(solvent=thf) geom=connectivity empi
       : ricaldispersion=gd3bj int=ultrafine pop=(regular,mk)
SMILES : [Li].CC(C)(C)OC(=O)N1c2ccccc2CC[C]1c3ccccc3.COC(=O)C#N.C1CCOC1
Formula : C27H33LiN2O5
Charge : 0
Multiplicity : 1
Dipole : 19.8996 Debye
Energy : -1542.52284385 a.u.
Gibbs Energy : -1542.03543600 a.u.
Number of imaginary frequencies : 0

```

S11.6.1. Cartesian Co-ordinates (XYZ format)

68

```

C -4.74668884 1.86405504 -1.98543406
C -4.48983717 0.51373100 -2.21842790
C -3.36150098 -0.09154300 -1.66777694
C -2.50583005 0.66369998 -0.87192601
C -2.74976206 2.02146196 -0.62986499
C -3.87326908 2.61579704 -1.19902599
N -1.29216897 0.15936500 -0.30362901
C -0.09675200 0.96474802 -0.55986500

```

C -0.32188699 2.44212794 -0.36625901  
C -1.72149503 2.73558497 0.20364900  
C -1.25886095 -0.87950301 0.56692600  
O -0.22026999 -1.24840999 1.13108802  
O -2.44645000 -1.46448398 0.73584503  
C -2.61356592 -2.67518806 1.56943297  
C -2.26971602 -2.35989404 3.02360892  
C -1.77322698 -3.81607509 0.99877101  
C -4.10318804 -2.96711397 1.41426396  
C 0.76941901 0.50219101 -1.59819400  
Li 1.34126306 -0.18326600 0.94455397  
C 0.71341801 -0.82270998 -2.12680602  
C 1.60099006 -1.25893199 -3.09651399  
C 2.60495996 -0.42056599 -3.59673905  
C 2.68268704 0.88199103 -3.10009003  
C 1.79814899 1.33830595 -2.12992692  
H -5.62168217 2.33251095 -2.42080092  
H -5.16329288 -0.06901700 -2.83608389  
H -3.15088701 -1.13803804 -1.84254706  
H -4.06624413 3.66862893 -1.02317798  
H -0.22176200 2.97787404 -1.32169700  
H 0.42773399 2.91298389 0.29390800  
H -1.91241503 3.80948997 0.23242100  
H -1.76978099 2.36675501 1.23523498  
H -2.53527308 -3.21519589 3.64961505  
H -2.84234691 -1.49478996 3.36574292  
H -1.20837700 -2.15162301 3.14121509  
H -2.01216602 -4.74006081 1.53038394  
H -2.00394392 -3.96133995 -0.05926900  
H -0.70940000 -3.61437392 1.10556805  
H -4.37019491 -3.85186791 1.99549997  
H -4.35025120 -3.14866590 0.36649299  
H -4.69582987 -2.12220001 1.76994097  
H -0.05127700 -1.49981499 -1.76787806  
H 1.51233006 -2.27383900 -3.47136307  
H 3.29883599 -0.77211100 -4.35041714  
H 3.44403005 1.55825806 -3.47637606  
H 1.88105905 2.36178899 -1.78516996  
C 1.82184398 2.53988791 2.05107808  
O 1.48559594 1.36701095 2.04990697  
C 1.02809095 3.55760503 2.71333694  
N 0.36389399 4.32036018 3.27097988  
O 2.92561412 3.04625201 1.51607394  
C 3.80075788 2.11120200 0.83635002  
H 4.01750612 1.26382005 1.48504901  
H 3.32897711 1.77126002 -0.08799300  
H 4.70147085 2.67658091 0.61898202  
O 2.86537600 -1.36737394 0.85771197  
C 3.79513001 -1.35659003 -0.26171601  
C 2.61314511 -2.73982406 1.23190498  
C 3.85804605 -2.80033112 -0.78998798  
H 3.40424705 -0.66143900 -1.00178099  
H 4.76639986 -1.00375295 0.09418700  
C 2.68217301 -3.49719596 -0.08523700  
H 3.38828301 -3.07331395 1.93162501  
H 1.64082801 -2.76914310 1.71987498  
H 4.80165577 -3.27222991 -0.50738102  
H 3.77108788 -2.82879400 -1.87540102  
H 2.84065199 -4.56780815 0.05146100  
H 1.75585198 -3.34430599 -0.64317000



## S11.6.2. Frequencies

| Mode | IR frequency | IR intensity | Raman intensity |
|------|--------------|--------------|-----------------|
| 1    | 14.18100000  | 0.48270000   | 0.00000000      |
| 2    | 18.94420000  | 0.31250000   | 0.00000000      |
| 3    | 24.79670000  | 2.05730000   | 0.00000000      |
| 4    | 32.75570000  | 0.88440000   | 0.00000000      |
| 5    | 36.24090000  | 1.68810000   | 0.00000000      |
| 6    | 43.67920000  | 0.88150000   | 0.00000000      |
| 7    | 53.15610000  | 1.86030000   | 0.00000000      |
| 8    | 57.70280000  | 2.25480000   | 0.00000000      |
| 9    | 65.57430000  | 3.84660000   | 0.00000000      |
| 10   | 69.72900000  | 0.64440000   | 0.00000000      |
| 11   | 83.73040000  | 0.88940000   | 0.00000000      |
| 12   | 89.01490000  | 0.99350000   | 0.00000000      |
| 13   | 91.71940000  | 0.81760000   | 0.00000000      |
| 14   | 98.66720000  | 7.03660000   | 0.00000000      |
| 15   | 107.58760000 | 0.40920000   | 0.00000000      |
| 16   | 111.05220000 | 7.00020000   | 0.00000000      |
| 17   | 121.67200000 | 4.30300000   | 0.00000000      |
| 18   | 123.05090000 | 2.58100000   | 0.00000000      |
| 19   | 136.42480000 | 3.48660000   | 0.00000000      |
| 20   | 146.66740000 | 3.03540000   | 0.00000000      |
| 21   | 151.98510000 | 5.03680000   | 0.00000000      |
| 22   | 163.16180000 | 0.83350000   | 0.00000000      |
| 23   | 184.68510000 | 8.64430000   | 0.00000000      |
| 24   | 191.96250000 | 1.20890000   | 0.00000000      |
| 25   | 204.97430000 | 10.54010000  | 0.00000000      |
| 26   | 206.64220000 | 2.05650000   | 0.00000000      |
| 27   | 215.28760000 | 3.25130000   | 0.00000000      |
| 28   | 235.31650000 | 18.19860000  | 0.00000000      |
| 29   | 243.09680000 | 0.68870000   | 0.00000000      |
| 30   | 263.36380000 | 6.89530000   | 0.00000000      |
| 31   | 267.87140000 | 0.09460000   | 0.00000000      |
| 32   | 269.77860000 | 0.68500000   | 0.00000000      |
| 33   | 288.40330000 | 31.43120000  | 0.00000000      |
| 34   | 294.38190000 | 1.98270000   | 0.00000000      |
| 35   | 305.35050000 | 16.64530000  | 0.00000000      |
| 36   | 324.89780000 | 4.35270000   | 0.00000000      |
| 37   | 330.36770000 | 25.68090000  | 0.00000000      |
| 38   | 343.54040000 | 30.41010000  | 0.00000000      |
| 39   | 350.77940000 | 1.70510000   | 0.00000000      |
| 40   | 359.56320000 | 47.18690000  | 0.00000000      |
| 41   | 374.63340000 | 25.78560000  | 0.00000000      |
| 42   | 415.73720000 | 1.61930000   | 0.00000000      |
| 43   | 425.70660000 | 2.94740000   | 0.00000000      |
| 44   | 429.99540000 | 1.00000000   | 0.00000000      |
| 45   | 435.75710000 | 8.83230000   | 0.00000000      |
| 46   | 455.61690000 | 11.05300000  | 0.00000000      |
| 47   | 457.80460000 | 3.84530000   | 0.00000000      |
| 48   | 473.26030000 | 55.84470000  | 0.00000000      |
| 49   | 487.08870000 | 43.99770000  | 0.00000000      |
| 50   | 494.49500000 | 6.19400000   | 0.00000000      |
| 51   | 529.53720000 | 18.33680000  | 0.00000000      |
| 52   | 533.53350000 | 119.39030000 | 0.00000000      |
| 53   | 543.45080000 | 24.29810000  | 0.00000000      |
| 54   | 548.15060000 | 11.70370000  | 0.00000000      |
| 55   | 571.04930000 | 15.04380000  | 0.00000000      |
| 56   | 589.55010000 | 5.85920000   | 0.00000000      |
| 57   | 597.55750000 | 40.08620000  | 0.00000000      |
| 58   | 620.50050000 | 24.74460000  | 0.00000000      |
| 59   | 633.91900000 | 0.19540000   | 0.00000000      |
| 60   | 644.11050000 | 0.96460000   | 0.00000000      |

|     |               |              |            |
|-----|---------------|--------------|------------|
| 61  | 686.52720000  | 16.52110000  | 0.00000000 |
| 62  | 692.48230000  | 82.36730000  | 0.00000000 |
| 63  | 696.03280000  | 15.77920000  | 0.00000000 |
| 64  | 707.00720000  | 53.99930000  | 0.00000000 |
| 65  | 730.62080000  | 16.91050000  | 0.00000000 |
| 66  | 749.24840000  | 45.84280000  | 0.00000000 |
| 67  | 756.29500000  | 26.09050000  | 0.00000000 |
| 68  | 767.48700000  | 11.53270000  | 0.00000000 |
| 69  | 775.15360000  | 48.95470000  | 0.00000000 |
| 70  | 791.43930000  | 10.93020000  | 0.00000000 |
| 71  | 810.29480000  | 5.68680000   | 0.00000000 |
| 72  | 821.62470000  | 3.29970000   | 0.00000000 |
| 73  | 824.41280000  | 6.07550000   | 0.00000000 |
| 74  | 844.79670000  | 32.03060000  | 0.00000000 |
| 75  | 853.53830000  | 5.23480000   | 0.00000000 |
| 76  | 873.04600000  | 165.36200000 | 0.00000000 |
| 77  | 878.40270000  | 2.59930000   | 0.00000000 |
| 78  | 879.84360000  | 24.61220000  | 0.00000000 |
| 79  | 894.44470000  | 37.53130000  | 0.00000000 |
| 80  | 895.65230000  | 44.42710000  | 0.00000000 |
| 81  | 916.31300000  | 21.23200000  | 0.00000000 |
| 82  | 922.67030000  | 13.32490000  | 0.00000000 |
| 83  | 928.38430000  | 0.09630000   | 0.00000000 |
| 84  | 930.85350000  | 2.38740000   | 0.00000000 |
| 85  | 933.09590000  | 7.14110000   | 0.00000000 |
| 86  | 952.12170000  | 0.15190000   | 0.00000000 |
| 87  | 961.47010000  | 16.69620000  | 0.00000000 |
| 88  | 968.32880000  | 0.09070000   | 0.00000000 |
| 89  | 970.82780000  | 0.12160000   | 0.00000000 |
| 90  | 972.51420000  | 0.80410000   | 0.00000000 |
| 91  | 976.56170000  | 0.19070000   | 0.00000000 |
| 92  | 988.40640000  | 46.41990000  | 0.00000000 |
| 93  | 988.99650000  | 55.39700000  | 0.00000000 |
| 94  | 994.86860000  | 39.99910000  | 0.00000000 |
| 95  | 1019.31050000 | 40.96750000  | 0.00000000 |
| 96  | 1042.98890000 | 11.17850000  | 0.00000000 |
| 97  | 1044.12310000 | 9.41650000   | 0.00000000 |
| 98  | 1045.79930000 | 24.89560000  | 0.00000000 |
| 99  | 1050.80930000 | 3.15380000   | 0.00000000 |
| 100 | 1051.76520000 | 116.05610000 | 0.00000000 |
| 101 | 1055.94020000 | 6.17350000   | 0.00000000 |
| 102 | 1061.48850000 | 22.01700000  | 0.00000000 |
| 103 | 1083.25150000 | 71.78040000  | 0.00000000 |
| 104 | 1105.52990000 | 44.35890000  | 0.00000000 |
| 105 | 1136.36730000 | 117.79510000 | 0.00000000 |
| 106 | 1159.45870000 | 0.82070000   | 0.00000000 |
| 107 | 1166.93020000 | 57.52410000  | 0.00000000 |
| 108 | 1173.01010000 | 47.38610000  | 0.00000000 |
| 109 | 1176.23760000 | 2.90650000   | 0.00000000 |
| 110 | 1179.76000000 | 10.57500000  | 0.00000000 |
| 111 | 1187.47390000 | 448.43580000 | 0.00000000 |
| 112 | 1194.48700000 | 106.91380000 | 0.00000000 |
| 113 | 1194.85960000 | 25.36070000  | 0.00000000 |
| 114 | 1203.28540000 | 66.46650000  | 0.00000000 |
| 115 | 1212.62990000 | 150.31780000 | 0.00000000 |
| 116 | 1216.47070000 | 66.34370000  | 0.00000000 |
| 117 | 1225.01870000 | 677.25580000 | 0.00000000 |
| 118 | 1229.12010000 | 21.68990000  | 0.00000000 |
| 119 | 1244.03060000 | 444.19070000 | 0.00000000 |
| 120 | 1256.99860000 | 5.50830000   | 0.00000000 |
| 121 | 1269.00090000 | 23.52140000  | 0.00000000 |
| 122 | 1277.70540000 | 112.95430000 | 0.00000000 |
| 123 | 1279.74730000 | 5.25270000   | 0.00000000 |
| 124 | 1280.50080000 | 20.43860000  | 0.00000000 |

|     |               |              |            |
|-----|---------------|--------------|------------|
| 125 | 1309.25110000 | 31.82610000  | 0.00000000 |
| 126 | 1314.82020000 | 35.15140000  | 0.00000000 |
| 127 | 1324.49310000 | 2.43710000   | 0.00000000 |
| 128 | 1335.20260000 | 32.54640000  | 0.00000000 |
| 129 | 1338.27330000 | 1.67440000   | 0.00000000 |
| 130 | 1339.27130000 | 1.30200000   | 0.00000000 |
| 131 | 1359.46570000 | 32.44940000  | 0.00000000 |
| 132 | 1363.12870000 | 98.60780000  | 0.00000000 |
| 133 | 1371.67320000 | 1.50570000   | 0.00000000 |
| 134 | 1379.49790000 | 173.35870000 | 0.00000000 |
| 135 | 1394.78020000 | 25.98200000  | 0.00000000 |
| 136 | 1397.67040000 | 49.22790000  | 0.00000000 |
| 137 | 1403.51050000 | 6.76080000   | 0.00000000 |
| 138 | 1414.98180000 | 723.42020000 | 0.00000000 |
| 139 | 1421.97560000 | 54.80490000  | 0.00000000 |
| 140 | 1466.61390000 | 0.18410000   | 0.00000000 |
| 141 | 1471.12690000 | 8.95830000   | 0.00000000 |
| 142 | 1473.44790000 | 40.26350000  | 0.00000000 |
| 143 | 1477.80820000 | 6.40980000   | 0.00000000 |
| 144 | 1481.98980000 | 6.77130000   | 0.00000000 |
| 145 | 1484.37270000 | 4.04350000   | 0.00000000 |
| 146 | 1484.90740000 | 2.41760000   | 0.00000000 |
| 147 | 1487.85080000 | 38.90450000  | 0.00000000 |
| 148 | 1491.39150000 | 19.54000000  | 0.00000000 |
| 149 | 1491.77710000 | 12.18330000  | 0.00000000 |
| 150 | 1495.30650000 | 21.06400000  | 0.00000000 |
| 151 | 1495.52450000 | 5.54970000   | 0.00000000 |
| 152 | 1498.21160000 | 1.49510000   | 0.00000000 |
| 153 | 1510.29520000 | 34.41200000  | 0.00000000 |
| 154 | 1512.17340000 | 280.96770000 | 0.00000000 |
| 155 | 1518.18740000 | 39.54610000  | 0.00000000 |
| 156 | 1519.84170000 | 61.77220000  | 0.00000000 |
| 157 | 1520.89940000 | 81.68950000  | 0.00000000 |
| 158 | 1527.52820000 | 4.89780000   | 0.00000000 |
| 159 | 1569.69600000 | 19.73220000  | 0.00000000 |
| 160 | 1622.30540000 | 201.96800000 | 0.00000000 |
| 161 | 1625.34390000 | 319.53770000 | 0.00000000 |
| 162 | 1642.58810000 | 124.40950000 | 0.00000000 |
| 163 | 1663.39260000 | 450.71570000 | 0.00000000 |
| 164 | 1698.11580000 | 644.93490000 | 0.00000000 |
| 165 | 2312.74290000 | 851.78620000 | 0.00000000 |
| 166 | 2903.82640000 | 739.72710000 | 0.00000000 |
| 167 | 2961.86680000 | 76.78330000  | 0.00000000 |
| 168 | 3013.20740000 | 83.77610000  | 0.00000000 |
| 169 | 3015.37050000 | 51.21060000  | 0.00000000 |
| 170 | 3038.62780000 | 13.82870000  | 0.00000000 |
| 171 | 3039.58390000 | 32.44130000  | 0.00000000 |
| 172 | 3041.52170000 | 44.04420000  | 0.00000000 |
| 173 | 3046.68540000 | 24.31650000  | 0.00000000 |
| 174 | 3050.16290000 | 44.89250000  | 0.00000000 |
| 175 | 3058.40070000 | 68.09010000  | 0.00000000 |
| 176 | 3058.92050000 | 32.45820000  | 0.00000000 |
| 177 | 3088.74360000 | 46.61880000  | 0.00000000 |
| 178 | 3101.45550000 | 7.95470000   | 0.00000000 |
| 179 | 3103.15660000 | 30.55840000  | 0.00000000 |
| 180 | 3107.38260000 | 30.89670000  | 0.00000000 |
| 181 | 3112.48130000 | 40.54430000  | 0.00000000 |
| 182 | 3116.82400000 | 29.59080000  | 0.00000000 |
| 183 | 3116.91780000 | 74.02540000  | 0.00000000 |
| 184 | 3132.11190000 | 17.71150000  | 0.00000000 |
| 185 | 3136.03620000 | 2.27870000   | 0.00000000 |
| 186 | 3140.13920000 | 11.92240000  | 0.00000000 |
| 187 | 3143.38850000 | 0.50610000   | 0.00000000 |
| 188 | 3146.31060000 | 36.10400000  | 0.00000000 |

|     |               |             |            |
|-----|---------------|-------------|------------|
| 189 | 3146.44670000 | 30.31190000 | 0.00000000 |
| 190 | 3150.71870000 | 27.54140000 | 0.00000000 |
| 191 | 3161.10370000 | 4.90910000  | 0.00000000 |
| 192 | 3171.24720000 | 22.29190000 | 0.00000000 |
| 193 | 3176.00470000 | 27.53270000 | 0.00000000 |
| 194 | 3182.29740000 | 57.96470000 | 0.00000000 |
| 195 | 3182.75170000 | 1.93280000  | 0.00000000 |
| 196 | 3185.78760000 | 48.05740000 | 0.00000000 |
| 197 | 3188.37630000 | 29.14340000 | 0.00000000 |
| 198 | 3204.48720000 | 12.23840000 | 0.00000000 |

**S11.7. LITHIATED INTERMEDIATE FROM 2a WITH COORDINATED CYANOFORMATE AND THF  
(2<sup>nd</sup> ISOMER)**

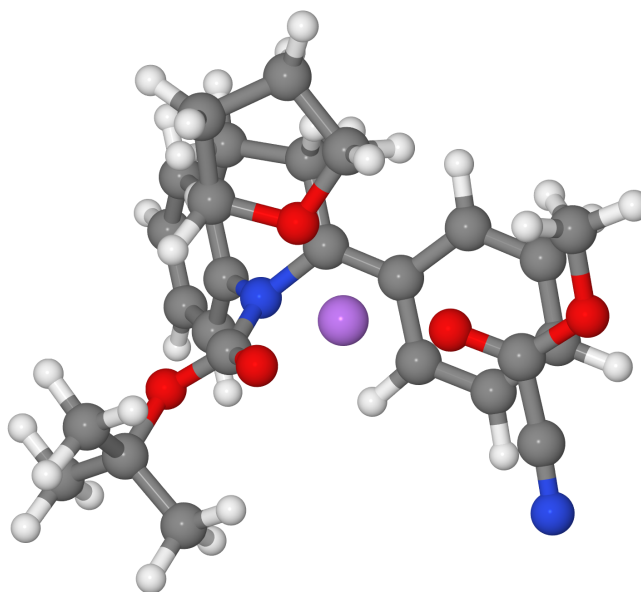

```

Route : # opt freq b3lyp/6-311g(d,p) scrf=(solvent=thf) geom=connectivity empi
       : ricaldispersion=gd3bj int=ultrafine pop=(regular,mk)
SMILES : [Li].CC(C)(C)OC(=O)N1c2ccccc2CC[C]1c3ccccc3.COC(=O)C#N.C1CCOC1
Formula : C27H33LiN2O5
Charge : 0
Multiplicity : 1
Dipole : 27.5512
Energy : -1542.52179113
Gibbs Energy : -1542.03634000
Number of imaginary frequencies : 0
  
```

Debye  
a.u.  
a.u.

**S11.7.1. Cartesian Co-ordinates (XYZ format)**

68

```

C -5.14303780 1.13559699 -2.46853900
C -4.83616400 -0.22018400 -2.36355901
C -3.67315102 -0.62807697 -1.71303999
C -2.83392501 0.33146399 -1.15658104
C -3.12853193 1.69754899 -1.25135303
C -4.28681707 2.08955097 -1.91864395
N -1.58013296 0.02153000 -0.53360099
C -0.46359000 0.80373502 -1.01955199
C -0.70151502 2.29316092 -1.05372500
C -2.14076209 2.64243102 -0.62169403
C -1.46494198 -0.78036702 0.55864900
O -0.39766100 -0.97706598 1.14922798
O -2.62440300 -1.34559202 0.90898198
C -2.71391797 -2.33912992 2.00064898
C -2.32526588 -1.69221103 3.32875395
C -1.85572302 -3.55718589 1.66513002
C -4.19701385 -2.69803309 1.98550296
  
```

|    |             |             |             |
|----|-------------|-------------|-------------|
| C  | 0.63300800  | 0.17433999  | -1.58045697 |
| Li | 1.35910797  | -0.29852599 | 0.97218198  |
| C  | 0.75395000  | -1.26339698 | -1.70597398 |
| C  | 1.88893497  | -1.85411203 | -2.20569491 |
| C  | 3.01771593  | -1.09697902 | -2.58423710 |
| C  | 2.90510297  | 0.30639899  | -2.53730202 |
| C  | 1.78118801  | 0.92726701  | -2.04218698 |
| H  | -6.04397297 | 1.44968295  | -2.98250198 |
| H  | -5.49618483 | -0.96243399 | -2.79701209 |
| H  | -3.42008305 | -1.67646897 | -1.63087296 |
| H  | -4.52048588 | 3.14536905  | -2.00402308 |
| H  | -0.54017299 | 2.67678094  | -2.07090211 |
| H  | 0.00318800  | 2.84229994  | -0.41381201 |
| H  | -2.37816501 | 3.67826295  | -0.86993903 |
| H  | -2.21779895 | 2.54822612  | 0.46842301  |
| H  | -2.54663801 | -2.38456511 | 4.14444304  |
| H  | -2.90662408 | -0.78071702 | 3.48665690  |
| H  | -1.26574898 | -1.44653296 | 3.35182595  |
| H  | -2.03637099 | -4.33970022 | 2.40581298  |
| H  | -2.12581801 | -3.94903111 | 0.68172902  |
| H  | -0.79648101 | -3.30802798 | 1.66911495  |
| H  | -4.40781689 | -3.43683505 | 2.76116490  |
| H  | -4.47884989 | -3.11661601 | 1.01748300  |
| H  | -4.80596781 | -1.81123698 | 2.17145300  |
| H  | -0.08508400 | -1.88523495 | -1.42179704 |
| H  | 1.92670798  | -2.93555188 | -2.28437090 |
| H  | 3.88304591  | -1.57160699 | -3.02764297 |
| H  | 3.73428512  | 0.91723597  | -2.88167405 |
| H  | 1.74932098  | 2.00943303  | -1.99919498 |
| C  | 4.11828518  | -1.08647501 | -0.07171700 |
| O  | 3.19705296  | -0.55703402 | 0.53745002  |
| C  | 4.18551922  | -2.51472497 | -0.30331600 |
| N  | 4.22870398  | -3.66764498 | -0.38770100 |
| O  | 5.26746416  | -0.48624501 | -0.38907000 |
| C  | 5.34563398  | 0.92300200  | -0.07866100 |
| H  | 4.56189585  | 1.46200502  | -0.60697001 |
| H  | 5.24529696  | 1.07470500  | 0.99612802  |
| H  | 6.32833004  | 1.23349798  | -0.42137000 |
| O  | 1.36602902  | 1.37475300  | 1.92071605  |
| C  | 2.26604009  | 2.47264504  | 1.62797797  |
| C  | 0.19776200  | 1.85635304  | 2.62548304  |
| C  | 1.51720202  | 3.74201202  | 2.03063798  |
| H  | 3.17625308  | 2.33365297  | 2.21764302  |
| H  | 2.51830411  | 2.43073511  | 0.56820899  |
| C  | 0.58316499  | 3.23811102  | 3.13962507  |
| H  | -0.63921797 | 1.90351200  | 1.92365801  |
| H  | -0.04139500 | 1.14044094  | 3.41166496  |
| H  | 0.93349898  | 4.12603807  | 1.19023895  |
| H  | 2.19366789  | 4.52972698  | 2.36360002  |
| H  | -0.28524101 | 3.87945008  | 3.29401898  |
| H  | 1.12423897  | 3.15491509  | 4.08589792  |

## S11.7.2. Frequencies

| Mode | IR frequency | IR intensity | Raman intensity |
|------|--------------|--------------|-----------------|
| 1    | 18.73030000  | 3.48300000   | 0.00000000      |
| 2    | 21.31390000  | 1.27460000   | 0.00000000      |
| 3    | 30.02350000  | 0.73630000   | 0.00000000      |
| 4    | 33.40750000  | 0.51180000   | 0.00000000      |
| 5    | 37.25940000  | 5.81210000   | 0.00000000      |
| 6    | 38.31040000  | 1.61350000   | 0.00000000      |
| 7    | 45.91160000  | 1.60140000   | 0.00000000      |
| 8    | 55.69710000  | 0.98490000   | 0.00000000      |
| 9    | 61.56440000  | 8.03730000   | 0.00000000      |
| 10   | 69.57120000  | 0.23930000   | 0.00000000      |
| 11   | 77.07620000  | 0.25310000   | 0.00000000      |
| 12   | 88.55840000  | 2.40550000   | 0.00000000      |
| 13   | 94.04070000  | 2.17260000   | 0.00000000      |
| 14   | 99.47030000  | 2.75060000   | 0.00000000      |
| 15   | 111.33630000 | 7.14830000   | 0.00000000      |
| 16   | 112.06990000 | 2.67740000   | 0.00000000      |
| 17   | 122.22300000 | 9.94710000   | 0.00000000      |
| 18   | 124.52660000 | 2.32180000   | 0.00000000      |
| 19   | 132.73880000 | 0.66310000   | 0.00000000      |
| 20   | 139.63850000 | 21.30040000  | 0.00000000      |
| 21   | 151.84810000 | 19.25430000  | 0.00000000      |
| 22   | 158.70920000 | 0.47100000   | 0.00000000      |
| 23   | 168.05930000 | 3.65850000   | 0.00000000      |
| 24   | 175.30820000 | 21.20860000  | 0.00000000      |
| 25   | 181.38560000 | 16.94320000  | 0.00000000      |
| 26   | 196.42330000 | 4.99170000   | 0.00000000      |
| 27   | 205.21110000 | 50.33680000  | 0.00000000      |
| 28   | 209.94670000 | 3.82210000   | 0.00000000      |
| 29   | 212.43900000 | 13.28840000  | 0.00000000      |
| 30   | 228.20830000 | 3.39040000   | 0.00000000      |
| 31   | 243.86500000 | 2.89190000   | 0.00000000      |
| 32   | 254.96140000 | 4.85300000   | 0.00000000      |
| 33   | 262.48030000 | 1.95350000   | 0.00000000      |
| 34   | 270.41200000 | 0.21040000   | 0.00000000      |
| 35   | 279.79360000 | 9.07550000   | 0.00000000      |
| 36   | 313.45120000 | 28.21170000  | 0.00000000      |
| 37   | 324.03870000 | 5.94870000   | 0.00000000      |
| 38   | 330.80530000 | 10.47510000  | 0.00000000      |
| 39   | 350.32260000 | 2.88220000   | 0.00000000      |
| 40   | 353.54970000 | 1.79540000   | 0.00000000      |
| 41   | 358.33260000 | 73.51930000  | 0.00000000      |
| 42   | 397.54140000 | 19.63460000  | 0.00000000      |
| 43   | 414.53350000 | 61.20140000  | 0.00000000      |
| 44   | 425.89250000 | 18.10950000  | 0.00000000      |
| 45   | 430.16040000 | 28.05780000  | 0.00000000      |
| 46   | 444.71750000 | 1.06850000   | 0.00000000      |
| 47   | 454.98010000 | 7.84080000   | 0.00000000      |
| 48   | 457.19780000 | 2.60730000   | 0.00000000      |
| 49   | 478.20590000 | 66.56910000  | 0.00000000      |
| 50   | 483.00950000 | 15.91780000  | 0.00000000      |
| 51   | 508.64210000 | 73.64020000  | 0.00000000      |
| 52   | 536.45780000 | 4.18630000   | 0.00000000      |
| 53   | 543.97510000 | 38.89950000  | 0.00000000      |
| 54   | 562.27690000 | 44.96750000  | 0.00000000      |
| 55   | 564.85440000 | 6.24720000   | 0.00000000      |
| 56   | 583.28800000 | 1.30680000   | 0.00000000      |
| 57   | 598.03950000 | 12.50740000  | 0.00000000      |
| 58   | 613.84410000 | 43.65360000  | 0.00000000      |
| 59   | 626.48360000 | 125.20140000 | 0.00000000      |
| 60   | 628.05970000 | 127.75250000 | 0.00000000      |

|     |               |               |            |
|-----|---------------|---------------|------------|
| 61  | 644.90760000  | 45.89600000   | 0.00000000 |
| 62  | 684.69140000  | 21.44570000   | 0.00000000 |
| 63  | 695.66700000  | 20.80960000   | 0.00000000 |
| 64  | 707.25380000  | 32.92460000   | 0.00000000 |
| 65  | 725.79000000  | 6.99260000    | 0.00000000 |
| 66  | 743.55210000  | 101.87680000  | 0.00000000 |
| 67  | 753.78840000  | 22.99670000   | 0.00000000 |
| 68  | 760.09000000  | 15.99090000   | 0.00000000 |
| 69  | 772.27700000  | 57.67730000   | 0.00000000 |
| 70  | 789.27730000  | 0.69870000    | 0.00000000 |
| 71  | 793.11520000  | 1.52300000    | 0.00000000 |
| 72  | 809.24230000  | 0.51800000    | 0.00000000 |
| 73  | 820.94850000  | 31.65290000   | 0.00000000 |
| 74  | 845.42480000  | 14.60320000   | 0.00000000 |
| 75  | 852.65430000  | 14.67260000   | 0.00000000 |
| 76  | 874.42250000  | 126.39400000  | 0.00000000 |
| 77  | 875.99290000  | 23.11620000   | 0.00000000 |
| 78  | 877.35790000  | 3.19190000    | 0.00000000 |
| 79  | 891.52120000  | 55.89430000   | 0.00000000 |
| 80  | 896.32470000  | 68.19620000   | 0.00000000 |
| 81  | 912.75730000  | 21.97100000   | 0.00000000 |
| 82  | 918.29380000  | 8.01720000    | 0.00000000 |
| 83  | 927.98840000  | 12.67380000   | 0.00000000 |
| 84  | 928.66870000  | 0.27870000    | 0.00000000 |
| 85  | 930.93260000  | 2.59460000    | 0.00000000 |
| 86  | 952.62340000  | 1.01080000    | 0.00000000 |
| 87  | 964.90020000  | 17.38900000   | 0.00000000 |
| 88  | 968.08340000  | 23.99020000   | 0.00000000 |
| 89  | 970.52480000  | 0.44640000    | 0.00000000 |
| 90  | 971.67430000  | 7.19030000    | 0.00000000 |
| 91  | 971.92190000  | 1.80650000    | 0.00000000 |
| 92  | 985.35540000  | 25.44370000   | 0.00000000 |
| 93  | 989.43010000  | 0.16510000    | 0.00000000 |
| 94  | 1007.33930000 | 60.62680000   | 0.00000000 |
| 95  | 1022.07800000 | 42.93880000   | 0.00000000 |
| 96  | 1027.81100000 | 37.22120000   | 0.00000000 |
| 97  | 1040.06250000 | 20.97120000   | 0.00000000 |
| 98  | 1042.42270000 | 9.66450000    | 0.00000000 |
| 99  | 1050.75210000 | 0.96890000    | 0.00000000 |
| 100 | 1056.25370000 | 4.70690000    | 0.00000000 |
| 101 | 1059.39380000 | 2.30270000    | 0.00000000 |
| 102 | 1061.85180000 | 129.52120000  | 0.00000000 |
| 103 | 1077.83210000 | 82.29840000   | 0.00000000 |
| 104 | 1102.08290000 | 65.09110000   | 0.00000000 |
| 105 | 1136.21740000 | 125.50040000  | 0.00000000 |
| 106 | 1165.58760000 | 36.96980000   | 0.00000000 |
| 107 | 1166.76460000 | 1.57770000    | 0.00000000 |
| 108 | 1170.96750000 | 0.54600000    | 0.00000000 |
| 109 | 1176.23830000 | 8.25300000    | 0.00000000 |
| 110 | 1178.21480000 | 83.98990000   | 0.00000000 |
| 111 | 1187.72420000 | 485.37310000  | 0.00000000 |
| 112 | 1191.41000000 | 16.17790000   | 0.00000000 |
| 113 | 1195.66260000 | 4.18330000    | 0.00000000 |
| 114 | 1202.08910000 | 482.21970000  | 0.00000000 |
| 115 | 1205.19950000 | 19.50530000   | 0.00000000 |
| 116 | 1209.13360000 | 14.32520000   | 0.00000000 |
| 117 | 1218.32690000 | 8.63390000    | 0.00000000 |
| 118 | 1224.06850000 | 1397.43980000 | 0.00000000 |
| 119 | 1242.70460000 | 29.45390000   | 0.00000000 |
| 120 | 1258.24690000 | 0.21150000    | 0.00000000 |
| 121 | 1264.63970000 | 14.75570000   | 0.00000000 |
| 122 | 1268.72040000 | 24.67110000   | 0.00000000 |
| 123 | 1278.40940000 | 152.26920000  | 0.00000000 |
| 124 | 1279.48490000 | 5.16660000    | 0.00000000 |



|     |               |               |            |
|-----|---------------|---------------|------------|
| 125 | 1311.11360000 | 13.50620000   | 0.00000000 |
| 126 | 1320.46890000 | 18.09280000   | 0.00000000 |
| 127 | 1323.38170000 | 1.33880000    | 0.00000000 |
| 128 | 1335.84990000 | 15.21750000   | 0.00000000 |
| 129 | 1339.00270000 | 4.37400000    | 0.00000000 |
| 130 | 1344.84750000 | 1.31710000    | 0.00000000 |
| 131 | 1368.76450000 | 5.40030000    | 0.00000000 |
| 132 | 1369.28890000 | 7.21360000    | 0.00000000 |
| 133 | 1373.14140000 | 59.50310000   | 0.00000000 |
| 134 | 1394.83710000 | 128.05840000  | 0.00000000 |
| 135 | 1395.54150000 | 232.79460000  | 0.00000000 |
| 136 | 1398.72990000 | 2.64270000    | 0.00000000 |
| 137 | 1402.00740000 | 389.99440000  | 0.00000000 |
| 138 | 1421.79200000 | 25.51960000   | 0.00000000 |
| 139 | 1449.08210000 | 25.25780000   | 0.00000000 |
| 140 | 1466.92740000 | 0.14960000    | 0.00000000 |
| 141 | 1467.31430000 | 35.86110000   | 0.00000000 |
| 142 | 1476.85090000 | 18.25170000   | 0.00000000 |
| 143 | 1477.53380000 | 12.30340000   | 0.00000000 |
| 144 | 1484.35760000 | 4.45580000    | 0.00000000 |
| 145 | 1485.09050000 | 2.13250000    | 0.00000000 |
| 146 | 1485.09910000 | 10.87280000   | 0.00000000 |
| 147 | 1487.84630000 | 29.51370000   | 0.00000000 |
| 148 | 1490.03920000 | 41.18140000   | 0.00000000 |
| 149 | 1491.64770000 | 52.14580000   | 0.00000000 |
| 150 | 1492.68340000 | 9.18670000    | 0.00000000 |
| 151 | 1494.42360000 | 4.77190000    | 0.00000000 |
| 152 | 1498.02830000 | 12.49710000   | 0.00000000 |
| 153 | 1498.71770000 | 2.93050000    | 0.00000000 |
| 154 | 1518.11420000 | 33.89530000   | 0.00000000 |
| 155 | 1519.62280000 | 128.40180000  | 0.00000000 |
| 156 | 1522.01410000 | 12.21770000   | 0.00000000 |
| 157 | 1532.01470000 | 1.48220000    | 0.00000000 |
| 158 | 1534.82720000 | 6.82670000    | 0.00000000 |
| 159 | 1555.51480000 | 159.93170000  | 0.00000000 |
| 160 | 1623.40060000 | 81.56390000   | 0.00000000 |
| 161 | 1630.97860000 | 357.60860000  | 0.00000000 |
| 162 | 1644.57410000 | 95.20790000   | 0.00000000 |
| 163 | 1662.99030000 | 201.11140000  | 0.00000000 |
| 164 | 1678.50160000 | 715.40880000  | 0.00000000 |
| 165 | 2291.97790000 | 1132.02570000 | 0.00000000 |
| 166 | 2967.27020000 | 196.34130000  | 0.00000000 |
| 167 | 2976.70570000 | 66.43110000   | 0.00000000 |
| 168 | 3011.35590000 | 81.05800000   | 0.00000000 |
| 169 | 3038.43080000 | 59.52140000   | 0.00000000 |
| 170 | 3038.49410000 | 37.55590000   | 0.00000000 |
| 171 | 3039.58330000 | 35.49630000   | 0.00000000 |
| 172 | 3046.43270000 | 19.72640000   | 0.00000000 |
| 173 | 3046.74010000 | 19.81830000   | 0.00000000 |
| 174 | 3049.10980000 | 32.98090000   | 0.00000000 |
| 175 | 3053.18780000 | 39.56410000   | 0.00000000 |
| 176 | 3063.13570000 | 45.57490000   | 0.00000000 |
| 177 | 3085.72720000 | 68.27000000   | 0.00000000 |
| 178 | 3099.47940000 | 29.90220000   | 0.00000000 |
| 179 | 3101.38670000 | 9.67850000    | 0.00000000 |
| 180 | 3102.89370000 | 29.01440000   | 0.00000000 |
| 181 | 3103.12640000 | 26.00510000   | 0.00000000 |
| 182 | 3108.01030000 | 20.43310000   | 0.00000000 |
| 183 | 3112.35700000 | 42.15940000   | 0.00000000 |
| 184 | 3115.21330000 | 74.17270000   | 0.00000000 |
| 185 | 3116.77250000 | 63.86440000   | 0.00000000 |
| 186 | 3141.93090000 | 23.59130000   | 0.00000000 |
| 187 | 3142.33970000 | 3.05220000    | 0.00000000 |
| 188 | 3145.90530000 | 30.49380000   | 0.00000000 |

|     |               |             |            |
|-----|---------------|-------------|------------|
| 189 | 3146.53010000 | 23.51640000 | 0.00000000 |
| 190 | 3155.51660000 | 13.47710000 | 0.00000000 |
| 191 | 3161.43830000 | 8.50210000  | 0.00000000 |
| 192 | 3172.28200000 | 21.24250000 | 0.00000000 |
| 193 | 3173.96880000 | 40.19030000 | 0.00000000 |
| 194 | 3177.45600000 | 24.00810000 | 0.00000000 |
| 195 | 3183.43170000 | 32.93520000 | 0.00000000 |
| 196 | 3186.69630000 | 52.44330000 | 0.00000000 |
| 197 | 3194.20620000 | 9.89770000  | 0.00000000 |
| 198 | 3205.44570000 | 9.83060000  | 0.00000000 |

## S11.8. LITHIATED INTERMEDIATE FROM 2a WITH COORDINATED CHLOROFORMATE

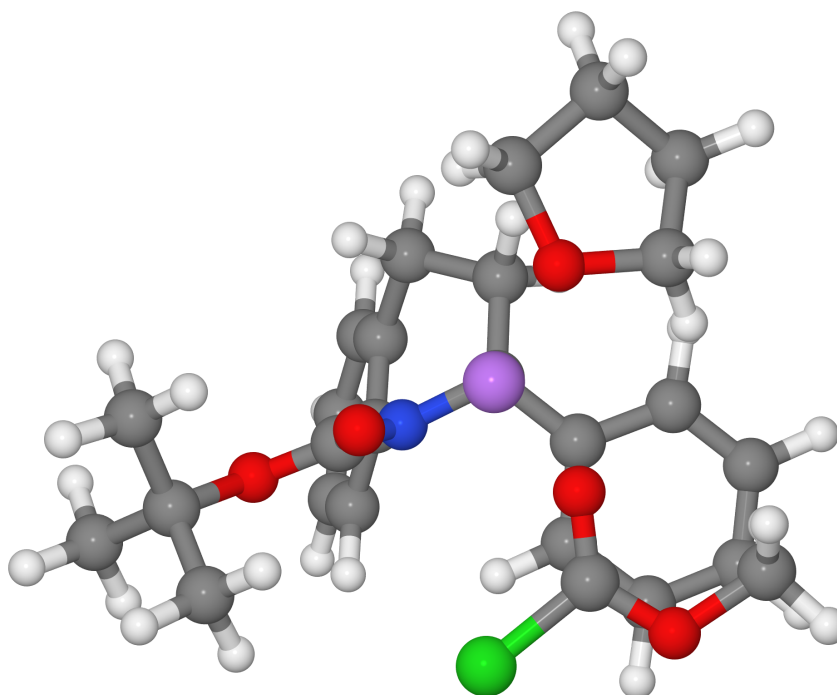

```

Route          : # opt=tight freq b3lyp/6-311g(d,p) scrf=(solvent=thf)
                geom=connectivity empiricaldispersion=gd3bj int=superfinegrid
                pop=(regular,mk) scf=tight nosymm
SMILES         : [Li].CC(C)(C)OC(=O)N1c2ccccc2CC[C]1c3ccccc3.COC(=O)Cl.COC(=O)Cl
Formula        : C24H28Cl2LiNO6
Charge         : 0
Multiplicity   : 1
Dipole         : 16.4584
Energy         : -2366.12483791
Gibbs Energy   : -2365.71579800
Number of imaginary frequencies : 0
  
```

Debye  
a.u.  
a.u.

## S11.8.1. Cartesian Co-ordinates (XYZ format)

62

```

C -3.96777892 -0.42875001 -3.56802392
C -3.70955205 -1.55750704 -2.79165101
C -2.79462600 -1.49335694 -1.74146497
C -2.15748501 -0.28691900 -1.46910405
C -2.41047502 0.85776800 -2.23781300
C -3.31418109 0.77385300 -3.29348207
N -1.13914597 -0.12018700 -0.48144999
C 0.12366300 0.45908299 -0.97834200
C -0.12859900 1.75537205 -1.75643301
C -1.63607502 2.08684111 -1.85184896
C -1.35114896 -0.27000001 0.84477502
O -0.49243701 -0.00008500 1.69911206
O -2.57136512 -0.73101801 1.13712895
  
```

|    |             |             |             |
|----|-------------|-------------|-------------|
| C  | -2.99705505 | -0.99374902 | 2.52792811  |
| C  | -2.98473001 | 0.30562600  | 3.33170009  |
| C  | -2.11319089 | -2.07458591 | 3.14692307  |
| C  | -4.42391777 | -1.49962902 | 2.33693004  |
| C  | 1.00408196  | -0.52125901 | -1.57168698 |
| Li | 1.17486703  | 0.61884201  | 0.97769201  |
| C  | 0.89244002  | -1.91535103 | -1.31141102 |
| C  | 1.78470600  | -2.83716106 | -1.84130299 |
| C  | 2.83844495  | -2.43549109 | -2.66686702 |
| C  | 2.97568488  | -1.07103097 | -2.93571305 |
| C  | 2.09550595  | -0.13802101 | -2.40201807 |
| H  | -4.67318010 | -0.48554599 | -4.38899088 |
| H  | -4.21277094 | -2.49268198 | -3.00873590 |
| H  | -2.58192110 | -2.36347103 | -1.13464797 |
| H  | -3.51087809 | 1.65180302  | -3.89975309 |
| H  | 0.25059301  | 1.65333605  | -2.78181410 |
| H  | 0.38824201  | 2.63042808  | -1.34055603 |
| H  | -1.80959105 | 2.90139198  | -2.55790091 |
| H  | -1.98963296 | 2.43041801  | -0.87186402 |
| H  | -3.45052505 | 0.13242801  | 4.30470705  |
| H  | -3.55908203 | 1.07527995  | 2.81036901  |
| H  | -1.96810102 | 0.66115201  | 3.48600292  |
| H  | -2.52161193 | -2.36104989 | 4.11901712  |
| H  | -2.09847808 | -2.96035600 | 2.50745797  |
| H  | -1.09411395 | -1.71886802 | 3.28183007  |
| H  | -4.86703110 | -1.73607504 | 3.30631399  |
| H  | -4.42979097 | -2.40034795 | 1.72016299  |
| H  | -5.03611183 | -0.73954600 | 1.84773397  |
| H  | 0.08556800  | -2.26675010 | -0.68086803 |
| H  | 1.65419304  | -3.88922811 | -1.60694098 |
| H  | 3.53245497  | -3.15858889 | -3.07820296 |
| H  | 3.78796506  | -0.72567201 | -3.56861091 |
| H  | 2.25665402  | 0.91205001  | -2.61529899 |
| C  | 2.81519103  | -1.80946505 | 1.29401004  |
| O  | 2.65081692  | -0.62017202 | 1.24831104  |
| O  | 3.83375907  | -2.48840404 | 0.84828401  |
| C  | 4.85205221  | -1.70349598 | 0.14972000  |
| H  | 4.38740015  | -1.19099903 | -0.68888301 |
| H  | 5.30113077  | -0.99956101 | 0.84822601  |
| H  | 5.57532310  | -2.43750000 | -0.18943299 |
| O  | 1.68924797  | 2.50099897  | 1.20252502  |
| C  | 1.34957099  | 3.61316490  | 0.90678197  |
| O  | 0.20785999  | 4.20141220  | 1.14668798  |
| C  | -0.77419698 | 3.41029406  | 1.88787997  |
| H  | -0.94924700 | 2.46879196  | 1.37545800  |
| H  | -0.40014401 | 3.22976899  | 2.89417100  |
| H  | -1.66573203 | 4.02786112  | 1.90478301  |
| Cl | 1.65127099  | -2.89039397 | 2.06781912  |
| Cl | 2.42787910  | 4.71313381  | 0.04318800  |

## S11.8.2. Frequencies

| Mode | IR frequency | IR intensity | Raman intensity |
|------|--------------|--------------|-----------------|
| 1    | 3.15620000   | 0.08760000   | 0.00000000      |
| 2    | 10.01550000  | 2.01430000   | 0.00000000      |
| 3    | 24.01110000  | 0.05120000   | 0.00000000      |
| 4    | 31.52490000  | 1.80690000   | 0.00000000      |
| 5    | 33.96480000  | 0.57150000   | 0.00000000      |
| 6    | 34.23520000  | 0.57780000   | 0.00000000      |
| 7    | 36.59010000  | 1.19300000   | 0.00000000      |
| 8    | 41.03600000  | 0.92460000   | 0.00000000      |
| 9    | 48.66540000  | 2.78900000   | 0.00000000      |
| 10   | 56.63960000  | 2.51520000   | 0.00000000      |
| 11   | 61.47620000  | 1.08690000   | 0.00000000      |
| 12   | 71.72280000  | 2.36960000   | 0.00000000      |
| 13   | 76.54290000  | 1.00370000   | 0.00000000      |
| 14   | 81.25830000  | 2.28610000   | 0.00000000      |
| 15   | 86.74910000  | 0.80840000   | 0.00000000      |
| 16   | 90.61920000  | 0.87120000   | 0.00000000      |
| 17   | 98.44830000  | 0.36000000   | 0.00000000      |
| 18   | 116.92230000 | 1.48210000   | 0.00000000      |
| 19   | 127.70490000 | 1.91000000   | 0.00000000      |
| 20   | 130.93360000 | 0.54480000   | 0.00000000      |
| 21   | 148.89110000 | 3.03310000   | 0.00000000      |
| 22   | 153.88500000 | 2.58220000   | 0.00000000      |
| 23   | 166.43770000 | 2.31580000   | 0.00000000      |
| 24   | 169.33800000 | 1.61990000   | 0.00000000      |
| 25   | 175.29480000 | 3.90880000   | 0.00000000      |
| 26   | 185.54800000 | 6.01560000   | 0.00000000      |
| 27   | 207.85860000 | 1.21730000   | 0.00000000      |
| 28   | 209.80710000 | 0.55730000   | 0.00000000      |
| 29   | 222.74650000 | 8.12950000   | 0.00000000      |
| 30   | 246.86830000 | 0.09260000   | 0.00000000      |
| 31   | 261.96830000 | 5.10140000   | 0.00000000      |
| 32   | 265.92830000 | 11.76080000  | 0.00000000      |
| 33   | 269.77870000 | 0.54100000   | 0.00000000      |
| 34   | 272.16290000 | 4.40190000   | 0.00000000      |
| 35   | 274.26190000 | 0.13880000   | 0.00000000      |
| 36   | 312.22320000 | 4.80380000   | 0.00000000      |
| 37   | 327.67040000 | 0.25310000   | 0.00000000      |
| 38   | 350.28600000 | 2.09140000   | 0.00000000      |
| 39   | 356.97660000 | 30.06380000  | 0.00000000      |
| 40   | 386.43670000 | 71.95010000  | 0.00000000      |
| 41   | 395.54030000 | 11.01570000  | 0.00000000      |
| 42   | 401.18390000 | 22.72650000  | 0.00000000      |
| 43   | 422.43410000 | 28.81000000  | 0.00000000      |
| 44   | 427.62330000 | 16.44570000  | 0.00000000      |
| 45   | 429.98280000 | 17.76510000  | 0.00000000      |
| 46   | 440.84300000 | 141.71110000 | 0.00000000      |
| 47   | 451.00540000 | 24.74520000  | 0.00000000      |
| 48   | 456.74550000 | 6.66390000   | 0.00000000      |
| 49   | 462.84210000 | 61.00660000  | 0.00000000      |
| 50   | 477.16850000 | 9.73900000   | 0.00000000      |
| 51   | 481.69500000 | 25.80860000  | 0.00000000      |
| 52   | 492.96700000 | 82.65700000  | 0.00000000      |
| 53   | 501.12050000 | 31.91310000  | 0.00000000      |
| 54   | 522.52320000 | 103.12160000 | 0.00000000      |
| 55   | 538.90330000 | 6.00870000   | 0.00000000      |
| 56   | 556.22230000 | 62.76580000  | 0.00000000      |
| 57   | 575.96510000 | 10.08130000  | 0.00000000      |
| 58   | 603.09960000 | 38.14570000  | 0.00000000      |
| 59   | 635.35620000 | 0.11210000   | 0.00000000      |
| 60   | 647.35840000 | 0.93430000   | 0.00000000      |

|     |               |              |            |
|-----|---------------|--------------|------------|
| 61  | 679.08250000  | 60.92800000  | 0.00000000 |
| 62  | 687.22130000  | 52.73350000  | 0.00000000 |
| 63  | 691.19060000  | 53.52200000  | 0.00000000 |
| 64  | 710.49870000  | 64.19320000  | 0.00000000 |
| 65  | 728.31160000  | 24.02640000  | 0.00000000 |
| 66  | 752.61240000  | 77.08620000  | 0.00000000 |
| 67  | 754.87000000  | 38.00090000  | 0.00000000 |
| 68  | 769.85000000  | 7.06810000   | 0.00000000 |
| 69  | 779.46370000  | 27.91440000  | 0.00000000 |
| 70  | 789.61490000  | 19.02350000  | 0.00000000 |
| 71  | 810.07320000  | 3.33270000   | 0.00000000 |
| 72  | 827.68850000  | 5.37630000   | 0.00000000 |
| 73  | 836.93180000  | 119.76120000 | 0.00000000 |
| 74  | 842.07150000  | 16.26540000  | 0.00000000 |
| 75  | 845.32840000  | 184.31310000 | 0.00000000 |
| 76  | 861.52440000  | 22.71470000  | 0.00000000 |
| 77  | 875.52890000  | 5.82140000   | 0.00000000 |
| 78  | 894.42910000  | 31.40490000  | 0.00000000 |
| 79  | 903.41980000  | 20.14690000  | 0.00000000 |
| 80  | 928.25620000  | 0.21410000   | 0.00000000 |
| 81  | 931.39960000  | 0.86560000   | 0.00000000 |
| 82  | 941.35220000  | 1.81420000   | 0.00000000 |
| 83  | 942.18520000  | 2.75760000   | 0.00000000 |
| 84  | 947.45510000  | 3.57210000   | 0.00000000 |
| 85  | 952.51830000  | 7.65740000   | 0.00000000 |
| 86  | 964.67130000  | 0.52960000   | 0.00000000 |
| 87  | 972.05010000  | 0.31770000   | 0.00000000 |
| 88  | 975.26050000  | 0.79400000   | 0.00000000 |
| 89  | 986.68690000  | 0.80620000   | 0.00000000 |
| 90  | 990.81010000  | 75.71160000  | 0.00000000 |
| 91  | 1009.83840000 | 37.75350000  | 0.00000000 |
| 92  | 1042.08760000 | 24.68780000  | 0.00000000 |
| 93  | 1045.32650000 | 15.59000000  | 0.00000000 |
| 94  | 1051.19140000 | 0.82820000   | 0.00000000 |
| 95  | 1055.45400000 | 6.40400000   | 0.00000000 |
| 96  | 1060.46120000 | 4.55520000   | 0.00000000 |
| 97  | 1071.56400000 | 71.72690000  | 0.00000000 |
| 98  | 1103.14620000 | 39.10640000  | 0.00000000 |
| 99  | 1132.96790000 | 101.56030000 | 0.00000000 |
| 100 | 1151.25280000 | 138.22910000 | 0.00000000 |
| 101 | 1165.63430000 | 24.15390000  | 0.00000000 |
| 102 | 1169.33110000 | 3.08510000   | 0.00000000 |
| 103 | 1171.78090000 | 2.24140000   | 0.00000000 |
| 104 | 1174.85070000 | 0.47280000   | 0.00000000 |
| 105 | 1179.05510000 | 384.09920000 | 0.00000000 |
| 106 | 1184.33070000 | 318.99260000 | 0.00000000 |
| 107 | 1187.46720000 | 253.27890000 | 0.00000000 |
| 108 | 1191.11870000 | 182.20150000 | 0.00000000 |
| 109 | 1202.73380000 | 47.23600000  | 0.00000000 |
| 110 | 1209.53310000 | 8.32320000   | 0.00000000 |
| 111 | 1224.74320000 | 11.58700000  | 0.00000000 |
| 112 | 1229.93100000 | 317.95960000 | 0.00000000 |
| 113 | 1238.95190000 | 440.95480000 | 0.00000000 |
| 114 | 1268.38770000 | 25.18380000  | 0.00000000 |
| 115 | 1276.68420000 | 244.26090000 | 0.00000000 |
| 116 | 1280.93210000 | 7.08130000   | 0.00000000 |
| 117 | 1306.15030000 | 70.67540000  | 0.00000000 |
| 118 | 1311.77880000 | 34.11890000  | 0.00000000 |
| 119 | 1320.38180000 | 43.81560000  | 0.00000000 |
| 120 | 1340.65530000 | 29.79800000  | 0.00000000 |
| 121 | 1342.84650000 | 24.47150000  | 0.00000000 |
| 122 | 1360.11590000 | 9.18850000   | 0.00000000 |
| 123 | 1369.35640000 | 25.13870000  | 0.00000000 |
| 124 | 1394.04820000 | 30.42480000  | 0.00000000 |

|     |               |               |            |
|-----|---------------|---------------|------------|
| 125 | 1397.56970000 | 42.23400000   | 0.00000000 |
| 126 | 1419.74710000 | 88.97750000   | 0.00000000 |
| 127 | 1422.09460000 | 674.19790000  | 0.00000000 |
| 128 | 1466.37470000 | 0.14740000    | 0.00000000 |
| 129 | 1470.91640000 | 44.21690000   | 0.00000000 |
| 130 | 1471.87780000 | 29.18250000   | 0.00000000 |
| 131 | 1472.25210000 | 7.83190000    | 0.00000000 |
| 132 | 1477.30770000 | 12.82250000   | 0.00000000 |
| 133 | 1477.34690000 | 12.94190000   | 0.00000000 |
| 134 | 1481.83160000 | 15.32480000   | 0.00000000 |
| 135 | 1481.85930000 | 3.87020000    | 0.00000000 |
| 136 | 1482.30470000 | 8.39140000    | 0.00000000 |
| 137 | 1485.03220000 | 4.61880000    | 0.00000000 |
| 138 | 1485.92700000 | 8.34100000    | 0.00000000 |
| 139 | 1487.05350000 | 50.63940000   | 0.00000000 |
| 140 | 1491.32790000 | 20.11100000   | 0.00000000 |
| 141 | 1500.64060000 | 0.50540000    | 0.00000000 |
| 142 | 1505.68510000 | 68.71560000   | 0.00000000 |
| 143 | 1511.71600000 | 146.34190000  | 0.00000000 |
| 144 | 1519.79620000 | 23.09560000   | 0.00000000 |
| 145 | 1521.38220000 | 103.52520000  | 0.00000000 |
| 146 | 1576.40480000 | 19.27130000   | 0.00000000 |
| 147 | 1620.72110000 | 85.90000000   | 0.00000000 |
| 148 | 1628.78640000 | 284.46270000  | 0.00000000 |
| 149 | 1640.08500000 | 203.57170000  | 0.00000000 |
| 150 | 1660.55820000 | 556.06500000  | 0.00000000 |
| 151 | 1783.36790000 | 1259.92990000 | 0.00000000 |
| 152 | 1794.87990000 | 62.13430000   | 0.00000000 |
| 153 | 2972.88810000 | 236.05140000  | 0.00000000 |
| 154 | 2984.82360000 | 41.45870000   | 0.00000000 |
| 155 | 3010.35710000 | 122.36580000  | 0.00000000 |
| 156 | 3037.64950000 | 21.59530000   | 0.00000000 |
| 157 | 3038.62290000 | 28.36560000   | 0.00000000 |
| 158 | 3045.84840000 | 22.85160000   | 0.00000000 |
| 159 | 3073.07310000 | 38.79450000   | 0.00000000 |
| 160 | 3078.80420000 | 59.80370000   | 0.00000000 |
| 161 | 3080.09620000 | 21.03560000   | 0.00000000 |
| 162 | 3099.71930000 | 11.50960000   | 0.00000000 |
| 163 | 3101.85020000 | 33.88430000   | 0.00000000 |
| 164 | 3112.19830000 | 40.22750000   | 0.00000000 |
| 165 | 3116.15420000 | 66.97350000   | 0.00000000 |
| 166 | 3140.63340000 | 28.07580000   | 0.00000000 |
| 167 | 3144.34440000 | 9.10130000    | 0.00000000 |
| 168 | 3146.82140000 | 29.24520000   | 0.00000000 |
| 169 | 3149.46100000 | 18.83660000   | 0.00000000 |
| 170 | 3158.62720000 | 8.09990000    | 0.00000000 |
| 171 | 3168.26220000 | 3.04800000    | 0.00000000 |
| 172 | 3169.20070000 | 22.50010000   | 0.00000000 |
| 173 | 3170.83370000 | 44.63250000   | 0.00000000 |
| 174 | 3173.91950000 | 7.46630000    | 0.00000000 |
| 175 | 3178.73890000 | 54.91100000   | 0.00000000 |
| 176 | 3184.10220000 | 47.58180000   | 0.00000000 |
| 177 | 3185.49990000 | 14.99520000   | 0.00000000 |
| 178 | 3196.54900000 | 4.82680000    | 0.00000000 |
| 179 | 3201.38370000 | 13.11480000   | 0.00000000 |
| 180 | 3203.34780000 | 2.37340000    | 0.00000000 |

## S11.9. LITHIATED INTERMEDIATE FROM 2a WITH COORDINATED CYANOFORMATE

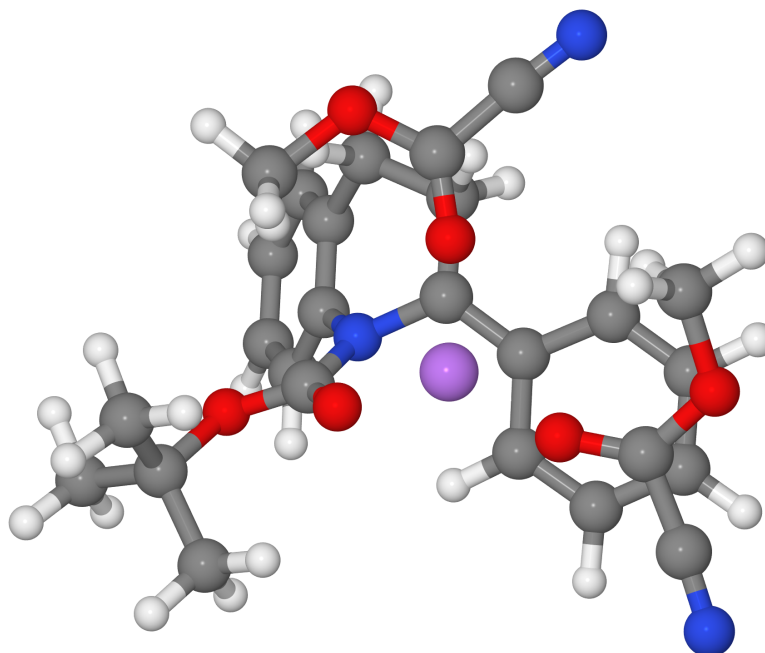

```

Route : # opt=tight freq b3lyp/6-311g(d,p) scrf=(solvent=thf)
      : geom=connectivity empiricaldispersion=gd3bj int=superfinegrid
      : pop=(regular,mk) scf=tight nosymm
SMILES : [Li].CC(C)(C)OC(=O)N1c2ccccc2CC[C]1c3ccccc3.COC(=O)C#N.COC(=O)C#N
Formula : C26H28LiN3O6
Charge : 0
Multiplicity : 1
Dipole : 25.1214
Energy : -1631.38251786
Gibbs Energy : -1630.95441900
Number of imaginary frequencies : 1

```

Deby  
a.u.  
a.u.

## S11.9.1. Cartesian Co-ordinates (XYZ format)

64

```

C -4.79495478 1.21578097 -2.76135492
C -4.54556417 -0.15022600 -2.63872194
C -3.46136999 -0.60138899 -1.88874698
C -2.64368296 0.32633001 -1.25134802
C -2.87947607 1.70134497 -1.36555398
C -3.95870209 2.13674498 -2.13108706
N -1.46335804 -0.03352600 -0.51679802
C -0.27516499 0.70802897 -0.88535601
C -0.46110100 2.18998408 -0.95036298
C -1.91457200 2.60913205 -0.65265101
C -1.47486198 -0.89336097 0.53723103
O -0.46720001 -1.16434002 1.20091105
O -2.68040204 -1.41384304 0.77035898
C -2.91409802 -2.41282701 1.83865905
C -2.61618900 -1.79291999 3.20252395

```



C -2.08699012 -3.66696501 1.56675398  
C -4.40487289 -2.69903898 1.68633497  
C 0.80513102 0.04007100 -1.48557603  
Li 1.28278100 -0.48386899 1.13189101  
C 0.85460299 -1.38249600 -1.67160904  
C 1.96501303 -2.00512505 -2.20801091  
C 3.10429907 -1.27796698 -2.58162689  
C 3.07057691 0.11921800 -2.44355392  
C 1.97358799 0.76311302 -1.90816903  
H -5.63418198 1.56322598 -3.35235691  
H -5.18819618 -0.86742502 -3.13566399  
H -3.25474095 -1.65842998 -1.79200196  
H -4.14482784 3.20051193 -2.23148489  
H -0.17627200 2.56925893 -1.94071400  
H 0.20370500 2.73298502 -0.24908200  
H -2.07732010 3.65115309 -0.93145198  
H -2.09429598 2.53747010 0.42591000  
H -2.93564510 -2.48231101 3.98745799  
H -3.17255998 -0.86004800 3.32127690  
H -1.55325794 -1.59334195 3.32187009  
H -2.37292504 -4.44581223 2.27738190  
H -2.28386497 -4.03675222 0.55782801  
H -1.02216494 -3.46936107 1.67145300  
H -4.71901417 -3.43119597 2.43267894  
H -4.61793518 -3.09838700 0.69303000  
H -4.98522902 -1.78512299 1.82606399  
H -0.00643100 -1.97941899 -1.40034103  
H 1.95663095 -3.08350205 -2.32908893  
H 3.96161699 -1.77235401 -3.01897502  
H 3.93149996 0.70732999 -2.74480510  
H 1.99809694 1.83985102 -1.79336095  
C 4.10189581 -1.25621700 0.21550700  
O 3.01769710 -1.19197798 0.76323801  
C 4.63062382 -2.51597309 -0.28911299  
N 5.04591703 -3.55357695 -0.57786298  
O 4.97984600 -0.27915499 0.09742500  
C 4.58556414 1.01007605 0.64344698  
H 3.66338611 1.33790803 0.17217600  
H 4.45237494 0.92218000 1.72121096  
H 5.40858603 1.67608094 0.40570700  
O 1.32735503 1.33651602 1.65906000  
C 1.02231097 2.50137091 1.85326803  
C 1.84794796 3.59389091 1.38214195  
O -0.03976800 2.92329311 2.52946305  
N 2.58590603 4.41105795 1.02847695  
C -0.89126301 1.88485098 3.08032107  
H -1.26311398 1.24512899 2.28336000  
H -0.33015800 1.29096699 3.80118108  
H -1.70373404 2.41679597 3.56463909

## S11.9.2. Frequencies

| Mode | IR frequency | IR intensity | Raman intensity |
|------|--------------|--------------|-----------------|
| 1    | -16.18610000 | 0.86570000   | 0.00000000      |
| 2    | 12.43400000  | 1.35420000   | 0.00000000      |
| 3    | 22.93420000  | 0.80970000   | 0.00000000      |
| 4    | 28.60250000  | 0.38310000   | 0.00000000      |
| 5    | 32.94950000  | 3.98900000   | 0.00000000      |
| 6    | 34.87240000  | 0.35710000   | 0.00000000      |
| 7    | 45.52290000  | 2.92970000   | 0.00000000      |
| 8    | 55.60280000  | 0.72910000   | 0.00000000      |
| 9    | 65.81170000  | 2.00700000   | 0.00000000      |
| 10   | 68.63630000  | 1.83100000   | 0.00000000      |
| 11   | 74.81480000  | 0.59800000   | 0.00000000      |
| 12   | 86.31000000  | 4.23390000   | 0.00000000      |
| 13   | 87.06490000  | 18.73280000  | 0.00000000      |
| 14   | 96.27060000  | 1.99040000   | 0.00000000      |
| 15   | 101.12790000 | 8.50090000   | 0.00000000      |
| 16   | 101.92740000 | 16.32660000  | 0.00000000      |
| 17   | 112.81640000 | 0.76030000   | 0.00000000      |
| 18   | 114.33930000 | 4.80710000   | 0.00000000      |
| 19   | 120.84940000 | 15.96280000  | 0.00000000      |
| 20   | 136.00340000 | 10.40230000  | 0.00000000      |
| 21   | 140.22730000 | 2.28700000   | 0.00000000      |
| 22   | 153.44380000 | 10.25030000  | 0.00000000      |
| 23   | 158.31150000 | 18.90350000  | 0.00000000      |
| 24   | 168.71890000 | 0.17240000   | 0.00000000      |
| 25   | 171.99250000 | 9.04510000   | 0.00000000      |
| 26   | 180.78170000 | 1.32600000   | 0.00000000      |
| 27   | 194.38800000 | 3.83300000   | 0.00000000      |
| 28   | 195.92440000 | 12.88880000  | 0.00000000      |
| 29   | 211.87640000 | 0.45430000   | 0.00000000      |
| 30   | 214.27610000 | 7.76190000   | 0.00000000      |
| 31   | 225.96920000 | 42.60510000  | 0.00000000      |
| 32   | 229.30330000 | 17.66620000  | 0.00000000      |
| 33   | 249.37360000 | 2.27460000   | 0.00000000      |
| 34   | 264.21330000 | 20.05550000  | 0.00000000      |
| 35   | 271.89160000 | 0.17740000   | 0.00000000      |
| 36   | 277.14420000 | 10.67590000  | 0.00000000      |
| 37   | 305.41510000 | 23.94250000  | 0.00000000      |
| 38   | 309.35410000 | 56.03990000  | 0.00000000      |
| 39   | 319.26340000 | 8.34530000   | 0.00000000      |
| 40   | 330.90660000 | 11.20150000  | 0.00000000      |
| 41   | 342.08230000 | 57.68090000  | 0.00000000      |
| 42   | 350.99340000 | 4.47790000   | 0.00000000      |
| 43   | 352.42350000 | 48.02660000  | 0.00000000      |
| 44   | 361.01310000 | 12.83390000  | 0.00000000      |
| 45   | 400.54850000 | 1.58710000   | 0.00000000      |
| 46   | 414.48740000 | 14.91960000  | 0.00000000      |
| 47   | 427.74600000 | 8.10880000   | 0.00000000      |
| 48   | 430.79000000 | 2.01550000   | 0.00000000      |
| 49   | 433.31350000 | 1.59180000   | 0.00000000      |
| 50   | 455.83620000 | 12.71310000  | 0.00000000      |
| 51   | 457.37270000 | 4.68680000   | 0.00000000      |
| 52   | 480.42060000 | 12.68550000  | 0.00000000      |
| 53   | 483.98970000 | 38.31590000  | 0.00000000      |
| 54   | 516.25870000 | 89.75290000  | 0.00000000      |
| 55   | 537.71040000 | 11.15150000  | 0.00000000      |
| 56   | 544.02210000 | 6.99970000   | 0.00000000      |
| 57   | 546.56530000 | 4.57850000   | 0.00000000      |
| 58   | 556.18370000 | 109.10550000 | 0.00000000      |
| 59   | 565.15370000 | 12.36460000  | 0.00000000      |
| 60   | 599.31150000 | 33.83060000  | 0.00000000      |

|     |               |               |            |
|-----|---------------|---------------|------------|
| 61  | 618.22470000  | 29.46830000   | 0.00000000 |
| 62  | 618.43490000  | 17.46800000   | 0.00000000 |
| 63  | 630.70540000  | 1.35930000    | 0.00000000 |
| 64  | 643.57860000  | 2.92040000    | 0.00000000 |
| 65  | 679.11600000  | 11.64680000   | 0.00000000 |
| 66  | 688.45170000  | 40.91760000   | 0.00000000 |
| 67  | 698.97800000  | 42.95190000   | 0.00000000 |
| 68  | 711.72650000  | 82.35070000   | 0.00000000 |
| 69  | 728.69140000  | 11.91210000   | 0.00000000 |
| 70  | 750.95530000  | 66.22290000   | 0.00000000 |
| 71  | 754.52530000  | 36.55890000   | 0.00000000 |
| 72  | 760.56980000  | 21.51220000   | 0.00000000 |
| 73  | 772.85810000  | 47.53910000   | 0.00000000 |
| 74  | 791.35890000  | 15.61810000   | 0.00000000 |
| 75  | 805.64260000  | 0.99630000    | 0.00000000 |
| 76  | 813.23280000  | 3.95220000    | 0.00000000 |
| 77  | 844.05030000  | 34.42000000   | 0.00000000 |
| 78  | 846.03390000  | 28.00620000   | 0.00000000 |
| 79  | 874.82150000  | 159.24340000  | 0.00000000 |
| 80  | 879.53430000  | 73.77850000   | 0.00000000 |
| 81  | 883.49490000  | 80.03090000   | 0.00000000 |
| 82  | 893.74170000  | 30.25600000   | 0.00000000 |
| 83  | 912.48590000  | 61.34820000   | 0.00000000 |
| 84  | 929.05060000  | 0.16900000    | 0.00000000 |
| 85  | 931.70510000  | 3.36600000    | 0.00000000 |
| 86  | 953.72270000  | 0.61540000    | 0.00000000 |
| 87  | 966.90200000  | 20.04830000   | 0.00000000 |
| 88  | 968.35920000  | 5.28320000    | 0.00000000 |
| 89  | 971.87330000  | 0.08320000    | 0.00000000 |
| 90  | 974.57990000  | 28.56430000   | 0.00000000 |
| 91  | 986.54060000  | 93.48800000   | 0.00000000 |
| 92  | 988.09450000  | 121.64340000  | 0.00000000 |
| 93  | 991.00440000  | 0.61250000    | 0.00000000 |
| 94  | 993.63590000  | 23.04430000   | 0.00000000 |
| 95  | 1021.38640000 | 40.70300000   | 0.00000000 |
| 96  | 1035.24270000 | 32.82190000   | 0.00000000 |
| 97  | 1041.53780000 | 45.68010000   | 0.00000000 |
| 98  | 1051.28850000 | 0.86280000    | 0.00000000 |
| 99  | 1056.80280000 | 4.60810000    | 0.00000000 |
| 100 | 1061.53100000 | 24.84460000   | 0.00000000 |
| 101 | 1085.13500000 | 91.51750000   | 0.00000000 |
| 102 | 1107.52310000 | 53.48240000   | 0.00000000 |
| 103 | 1137.88740000 | 136.75570000  | 0.00000000 |
| 104 | 1167.77870000 | 9.21790000    | 0.00000000 |
| 105 | 1168.85400000 | 2.63990000    | 0.00000000 |
| 106 | 1169.87120000 | 49.04480000   | 0.00000000 |
| 107 | 1174.23460000 | 64.03240000   | 0.00000000 |
| 108 | 1177.45190000 | 6.70170000    | 0.00000000 |
| 109 | 1185.81640000 | 440.56090000  | 0.00000000 |
| 110 | 1194.38760000 | 1282.97210000 | 0.00000000 |
| 111 | 1203.46800000 | 153.75800000  | 0.00000000 |
| 112 | 1207.51960000 | 8.83870000    | 0.00000000 |
| 113 | 1210.63450000 | 30.10210000   | 0.00000000 |
| 114 | 1213.38480000 | 621.03960000  | 0.00000000 |
| 115 | 1219.78270000 | 405.25740000  | 0.00000000 |
| 116 | 1248.42220000 | 167.07590000  | 0.00000000 |
| 117 | 1255.91290000 | 931.98190000  | 0.00000000 |
| 118 | 1269.30850000 | 25.85060000   | 0.00000000 |
| 119 | 1277.74860000 | 240.81500000  | 0.00000000 |
| 120 | 1280.22050000 | 40.45070000   | 0.00000000 |
| 121 | 1308.37400000 | 14.11650000   | 0.00000000 |
| 122 | 1322.29240000 | 20.70500000   | 0.00000000 |
| 123 | 1335.73240000 | 14.65200000   | 0.00000000 |
| 124 | 1337.09240000 | 3.69550000    | 0.00000000 |

|     |               |               |            |
|-----|---------------|---------------|------------|
| 125 | 1366.25390000 | 13.18530000   | 0.00000000 |
| 126 | 1372.62250000 | 27.44970000   | 0.00000000 |
| 127 | 1395.42420000 | 67.18580000   | 0.00000000 |
| 128 | 1396.82970000 | 276.89320000  | 0.00000000 |
| 129 | 1403.28890000 | 567.96120000  | 0.00000000 |
| 130 | 1421.92650000 | 23.69930000   | 0.00000000 |
| 131 | 1427.03890000 | 207.23170000  | 0.00000000 |
| 132 | 1467.64140000 | 5.70700000    | 0.00000000 |
| 133 | 1468.90220000 | 24.04460000   | 0.00000000 |
| 134 | 1471.19840000 | 17.78110000   | 0.00000000 |
| 135 | 1475.28200000 | 30.96120000   | 0.00000000 |
| 136 | 1476.96720000 | 29.39720000   | 0.00000000 |
| 137 | 1477.23660000 | 14.64260000   | 0.00000000 |
| 138 | 1482.80300000 | 4.83360000    | 0.00000000 |
| 139 | 1484.82530000 | 2.61970000    | 0.00000000 |
| 140 | 1485.29140000 | 1.50260000    | 0.00000000 |
| 141 | 1486.40330000 | 3.09030000    | 0.00000000 |
| 142 | 1487.51690000 | 35.83470000   | 0.00000000 |
| 143 | 1489.16230000 | 20.53230000   | 0.00000000 |
| 144 | 1489.61250000 | 43.69510000   | 0.00000000 |
| 145 | 1494.12430000 | 8.98640000    | 0.00000000 |
| 146 | 1499.51970000 | 0.72300000    | 0.00000000 |
| 147 | 1518.13820000 | 214.05740000  | 0.00000000 |
| 148 | 1519.67630000 | 68.88230000   | 0.00000000 |
| 149 | 1523.21120000 | 301.29750000  | 0.00000000 |
| 150 | 1553.66240000 | 39.24060000   | 0.00000000 |
| 151 | 1621.26490000 | 660.55900000  | 0.00000000 |
| 152 | 1624.64470000 | 45.84110000   | 0.00000000 |
| 153 | 1644.50470000 | 58.57510000   | 0.00000000 |
| 154 | 1663.36970000 | 170.29650000  | 0.00000000 |
| 155 | 1698.53050000 | 460.67870000  | 0.00000000 |
| 156 | 1725.06030000 | 462.70100000  | 0.00000000 |
| 157 | 2290.47340000 | 1371.30450000 | 0.00000000 |
| 158 | 2320.05230000 | 577.56030000  | 0.00000000 |
| 159 | 2854.46470000 | 904.97090000  | 0.00000000 |
| 160 | 2985.45310000 | 80.97400000   | 0.00000000 |
| 161 | 3025.98620000 | 55.65100000   | 0.00000000 |
| 162 | 3039.20030000 | 16.30700000   | 0.00000000 |
| 163 | 3040.50930000 | 28.60320000   | 0.00000000 |
| 164 | 3047.22780000 | 20.37980000   | 0.00000000 |
| 165 | 3070.75550000 | 35.46740000   | 0.00000000 |
| 166 | 3072.67850000 | 21.97250000   | 0.00000000 |
| 167 | 3091.65500000 | 49.43260000   | 0.00000000 |
| 168 | 3102.16410000 | 12.22800000   | 0.00000000 |
| 169 | 3104.29450000 | 26.63810000   | 0.00000000 |
| 170 | 3113.85110000 | 38.41080000   | 0.00000000 |
| 171 | 3117.80160000 | 60.76930000   | 0.00000000 |
| 172 | 3142.63610000 | 1.61900000    | 0.00000000 |
| 173 | 3145.63270000 | 31.74870000   | 0.00000000 |
| 174 | 3151.86720000 | 28.45320000   | 0.00000000 |
| 175 | 3155.40430000 | 22.87750000   | 0.00000000 |
| 176 | 3155.51060000 | 14.97240000   | 0.00000000 |
| 177 | 3163.35690000 | 5.91180000    | 0.00000000 |
| 178 | 3164.49880000 | 16.51690000   | 0.00000000 |
| 179 | 3173.80110000 | 20.34240000   | 0.00000000 |
| 180 | 3179.74950000 | 19.93900000   | 0.00000000 |
| 181 | 3187.01320000 | 38.79360000   | 0.00000000 |
| 182 | 3188.15570000 | 50.54350000   | 0.00000000 |
| 183 | 3190.01470000 | 10.72990000   | 0.00000000 |
| 184 | 3195.41170000 | 13.26550000   | 0.00000000 |
| 185 | 3197.09560000 | 11.40660000   | 0.00000000 |
| 186 | 3207.96580000 | 9.03770000    | 0.00000000 |

## S11.10. LITHIATED INTERMEDIATE FROM 2a WITH COORDINATED THF

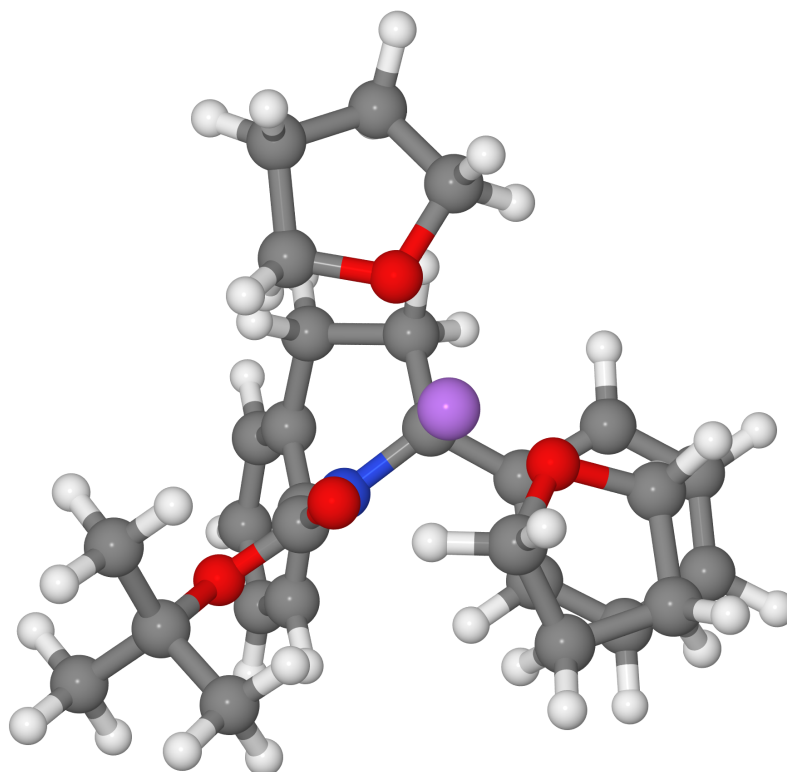

```

Route : # opt=(tight,maxstep=1) freq b3lyp/6-311g(d,p) scrf=(solvent=thf)
       nosymm geom=connectivity empiricaldispersion=gd3bj
       int=superfinegrid pop=(regular,mk) scf=tight
SMILES : [Li].CC(C)(C)OC(=O)N1c2cccc2CC[C]1c3cccc3.C1CCOC1.C1CCOC1
Formula : C28H38LiNO4
Charge : 0
Multiplicity : 1
Dipole : 20.5998 Debye
Energy : -1453.65977201 a.u.
Gibbs Energy : -1453.11957300 a.u.
Number of imaginary frequencies : 0

```

## S11.10.1. Cartesian Co-ordinates (XYZ format)

72

```

C -4.63538599 -2.22831988 -1.38085997
C -4.16422987 -2.49609995 -0.09631300
C -3.00132203 -1.88278306 0.36761999
C -2.32647204 -0.98941702 -0.45942801
C -2.79041409 -0.70814902 -1.75259805
C -3.94430709 -1.34086096 -2.20742297
N -1.08505404 -0.36777201 -0.12826100
C -0.00938200 -0.55208701 -1.11790395
C -0.47513199 -0.21268401 -2.53456402
C -1.95042801 0.24522200 -2.55538702
C -0.91607600 0.46474299 0.92306602

```

O 0.14699300 1.05781901 1.14921105  
O -2.00911689 0.57618099 1.69028103  
C -2.00898790 1.37354302 2.93219805  
C -1.75256503 2.84547496 2.61173201  
C -0.99006099 0.80192202 3.91694593  
C -3.43155193 1.17091703 3.44638205  
C 0.76799101 -1.74411595 -0.91736501  
Li 1.49403501 0.86572599 -0.24615100  
C 0.81540000 -2.43646312 0.32846299  
C 1.63554502 -3.53652310 0.52735502  
C 2.46336293 -4.02282906 -0.49067399  
C 2.43240190 -3.36932302 -1.72532594  
C 1.61431503 -2.26709509 -1.93980706  
H -5.53560877 -2.71327305 -1.74041700  
H -4.69682693 -3.19020700 0.54369700  
H -2.62463403 -2.08458900 1.36152005  
H -4.30584908 -1.13581598 -3.20964408  
H -0.39938799 -1.10182095 -3.17711306  
H 0.13365400 0.56008202 -3.02120900  
H -2.31802893 0.32754701 -3.58043504  
H -2.02001810 1.24333203 -2.10520291  
H -1.90534902 3.44341898 3.51349306  
H -2.45450711 3.19129491 1.84911895  
H -0.73663503 2.99685192 2.25358009  
H -1.09425104 1.30822003 4.87950993  
H -1.17235994 -0.26447201 4.06994009  
H 0.02658500 0.93933100 3.55455899  
H -3.57107496 1.71834099 4.38073921  
H -3.62403893 0.11188400 3.62883496  
H -4.15642023 1.53474295 2.71561098  
H 0.19367200 -2.08858991 1.14427495  
H 1.63166797 -4.02586603 1.49703705  
H 3.10599709 -4.87952995 -0.32695699  
H 3.06019497 -3.72366810 -2.53779197  
H 1.63958395 -1.77928305 -2.90722704  
O 3.18300796 0.51590103 0.66282701  
C 3.96593094 -0.69473398 0.46882099  
C 3.17578697 0.83250600 2.06995106  
C 4.14573097 -1.32623100 1.86191297  
H 3.40792394 -1.33515704 -0.21052200  
H 4.92156982 -0.42215601 0.01297700  
C 3.17744994 -0.52783900 2.75114202  
H 4.07467079 1.40957499 2.31949592  
H 2.28840804 1.43177497 2.26403594  
H 5.17266417 -1.19974804 2.21260095  
H 3.91516805 -2.39041805 1.84491599  
H 3.49649405 -0.47860199 3.79344392  
H 2.17442894 -0.95790601 2.70723510  
O 1.50546002 2.56099606 -1.19047797  
C 0.31936899 3.39053106 -1.10402596  
C 2.12294793 2.70780897 -2.49235797  
C 0.38188300 4.31889105 -2.31254792  
H -0.55899298 2.74038696 -1.13769102  
H 0.33690801 3.90888309 -0.14550400  
C 1.10134399 3.44787598 -3.35108209  
H 3.04581404 3.28385806 -2.37568498  
H 2.37026191 1.71290600 -2.86750197  
H 0.97730601 5.20658779 -2.08318210  
H -0.60840201 4.64226007 -2.63509607  
H 1.57211304 4.02508688 -4.14753389  
H 0.40097299 2.74149489 -3.80392098

## S11.10.2. Frequencies

| Mode | IR frequency | IR intensity | Raman intensity |
|------|--------------|--------------|-----------------|
| 1    | 5.78420000   | 0.43930000   | 0.00000000      |
| 2    | 9.93680000   | 0.21900000   | 0.00000000      |
| 3    | 16.33320000  | 1.34030000   | 0.00000000      |
| 4    | 25.50910000  | 1.61110000   | 0.00000000      |
| 5    | 33.83060000  | 0.76470000   | 0.00000000      |
| 6    | 35.01620000  | 0.04930000   | 0.00000000      |
| 7    | 42.43430000  | 1.46390000   | 0.00000000      |
| 8    | 49.15330000  | 0.59730000   | 0.00000000      |
| 9    | 56.01810000  | 2.60520000   | 0.00000000      |
| 10   | 65.17910000  | 0.69990000   | 0.00000000      |
| 11   | 69.95380000  | 1.74650000   | 0.00000000      |
| 12   | 75.76680000  | 1.60090000   | 0.00000000      |
| 13   | 80.62430000  | 1.79270000   | 0.00000000      |
| 14   | 91.88480000  | 1.77820000   | 0.00000000      |
| 15   | 93.10030000  | 0.83530000   | 0.00000000      |
| 16   | 99.66720000  | 0.72410000   | 0.00000000      |
| 17   | 112.64070000 | 2.24470000   | 0.00000000      |
| 18   | 115.35520000 | 1.55030000   | 0.00000000      |
| 19   | 128.42190000 | 5.26230000   | 0.00000000      |
| 20   | 133.88000000 | 0.94500000   | 0.00000000      |
| 21   | 146.21790000 | 11.96800000  | 0.00000000      |
| 22   | 162.33100000 | 3.34190000   | 0.00000000      |
| 23   | 169.52350000 | 1.07170000   | 0.00000000      |
| 24   | 175.07440000 | 3.38430000   | 0.00000000      |
| 25   | 205.50570000 | 2.26980000   | 0.00000000      |
| 26   | 208.81320000 | 0.46610000   | 0.00000000      |
| 27   | 223.49680000 | 8.62240000   | 0.00000000      |
| 28   | 241.99110000 | 0.01140000   | 0.00000000      |
| 29   | 259.62120000 | 0.35430000   | 0.00000000      |
| 30   | 262.72740000 | 5.49760000   | 0.00000000      |
| 31   | 269.63820000 | 0.45380000   | 0.00000000      |
| 32   | 273.11410000 | 0.95810000   | 0.00000000      |
| 33   | 296.04410000 | 5.37150000   | 0.00000000      |
| 34   | 322.16720000 | 2.06320000   | 0.00000000      |
| 35   | 330.54970000 | 1.03580000   | 0.00000000      |
| 36   | 350.58000000 | 2.77590000   | 0.00000000      |
| 37   | 368.43110000 | 3.19610000   | 0.00000000      |
| 38   | 400.42330000 | 70.32540000  | 0.00000000      |
| 39   | 419.75530000 | 19.24030000  | 0.00000000      |
| 40   | 426.84720000 | 8.29460000   | 0.00000000      |
| 41   | 427.98210000 | 34.93280000  | 0.00000000      |
| 42   | 441.36430000 | 16.54890000  | 0.00000000      |
| 43   | 454.88820000 | 16.36530000  | 0.00000000      |
| 44   | 459.04370000 | 12.55110000  | 0.00000000      |
| 45   | 466.87840000 | 109.06380000 | 0.00000000      |
| 46   | 481.49270000 | 23.69220000  | 0.00000000      |
| 47   | 494.56560000 | 62.91690000  | 0.00000000      |
| 48   | 504.73490000 | 136.54680000 | 0.00000000      |
| 49   | 537.87930000 | 13.85270000  | 0.00000000      |
| 50   | 545.32930000 | 62.61690000  | 0.00000000      |
| 51   | 573.94000000 | 4.63330000   | 0.00000000      |
| 52   | 580.90730000 | 1.38570000   | 0.00000000      |
| 53   | 589.98680000 | 6.00390000   | 0.00000000      |
| 54   | 599.32510000 | 35.77760000  | 0.00000000      |
| 55   | 634.36400000 | 0.14270000   | 0.00000000      |
| 56   | 644.48710000 | 0.51850000   | 0.00000000      |
| 57   | 686.70080000 | 12.61780000  | 0.00000000      |
| 58   | 689.17770000 | 36.35030000  | 0.00000000      |
| 59   | 694.54310000 | 24.25070000  | 0.00000000      |
| 60   | 706.43500000 | 66.79950000  | 0.00000000      |

|     |               |              |            |
|-----|---------------|--------------|------------|
| 61  | 728.23660000  | 21.85120000  | 0.00000000 |
| 62  | 745.11740000  | 76.56590000  | 0.00000000 |
| 63  | 753.85620000  | 35.53420000  | 0.00000000 |
| 64  | 769.59450000  | 5.30970000   | 0.00000000 |
| 65  | 776.09010000  | 31.17350000  | 0.00000000 |
| 66  | 788.67150000  | 11.71340000  | 0.00000000 |
| 67  | 808.11150000  | 3.69870000   | 0.00000000 |
| 68  | 819.57680000  | 4.74520000   | 0.00000000 |
| 69  | 822.22930000  | 3.62200000   | 0.00000000 |
| 70  | 843.75160000  | 17.43360000  | 0.00000000 |
| 71  | 849.28930000  | 30.57790000  | 0.00000000 |
| 72  | 851.27330000  | 16.40940000  | 0.00000000 |
| 73  | 873.91280000  | 2.48810000   | 0.00000000 |
| 74  | 876.68730000  | 14.71600000  | 0.00000000 |
| 75  | 878.83590000  | 26.86060000  | 0.00000000 |
| 76  | 890.55310000  | 105.29020000 | 0.00000000 |
| 77  | 894.48170000  | 30.21370000  | 0.00000000 |
| 78  | 897.72110000  | 17.12730000  | 0.00000000 |
| 79  | 905.40270000  | 22.91480000  | 0.00000000 |
| 80  | 916.56130000  | 12.32700000  | 0.00000000 |
| 81  | 919.64160000  | 15.42920000  | 0.00000000 |
| 82  | 927.93960000  | 0.65990000   | 0.00000000 |
| 83  | 928.52050000  | 10.08230000  | 0.00000000 |
| 84  | 930.08800000  | 1.53640000   | 0.00000000 |
| 85  | 931.84140000  | 5.94750000   | 0.00000000 |
| 86  | 946.45620000  | 0.88070000   | 0.00000000 |
| 87  | 954.06190000  | 9.81340000   | 0.00000000 |
| 88  | 961.26730000  | 0.26650000   | 0.00000000 |
| 89  | 969.63470000  | 0.92940000   | 0.00000000 |
| 90  | 970.02760000  | 0.17460000   | 0.00000000 |
| 91  | 971.14260000  | 1.89050000   | 0.00000000 |
| 92  | 971.89800000  | 0.39840000   | 0.00000000 |
| 93  | 984.71600000  | 0.56210000   | 0.00000000 |
| 94  | 988.45680000  | 72.14420000  | 0.00000000 |
| 95  | 1011.36420000 | 42.10980000  | 0.00000000 |
| 96  | 1040.88190000 | 10.78750000  | 0.00000000 |
| 97  | 1041.95270000 | 19.95160000  | 0.00000000 |
| 98  | 1042.53380000 | 3.81020000   | 0.00000000 |
| 99  | 1044.36830000 | 25.76020000  | 0.00000000 |
| 100 | 1050.59450000 | 0.79270000   | 0.00000000 |
| 101 | 1051.95180000 | 95.74060000  | 0.00000000 |
| 102 | 1054.96820000 | 5.26690000   | 0.00000000 |
| 103 | 1057.55650000 | 159.24020000 | 0.00000000 |
| 104 | 1061.04320000 | 11.27660000  | 0.00000000 |
| 105 | 1073.26310000 | 78.66340000  | 0.00000000 |
| 106 | 1101.82600000 | 45.90400000  | 0.00000000 |
| 107 | 1132.93190000 | 115.83670000 | 0.00000000 |
| 108 | 1154.18220000 | 101.63860000 | 0.00000000 |
| 109 | 1158.84980000 | 1.82580000   | 0.00000000 |
| 110 | 1167.59570000 | 0.78310000   | 0.00000000 |
| 111 | 1168.61380000 | 6.83400000   | 0.00000000 |
| 112 | 1174.37110000 | 0.12090000   | 0.00000000 |
| 113 | 1186.81610000 | 123.46170000 | 0.00000000 |
| 114 | 1190.50990000 | 10.62880000  | 0.00000000 |
| 115 | 1192.70140000 | 240.88780000 | 0.00000000 |
| 116 | 1194.26070000 | 19.72880000  | 0.00000000 |
| 117 | 1194.83220000 | 7.59670000   | 0.00000000 |
| 118 | 1202.51260000 | 49.45740000  | 0.00000000 |
| 119 | 1210.75420000 | 4.58120000   | 0.00000000 |
| 120 | 1226.42600000 | 6.10830000   | 0.00000000 |
| 121 | 1228.78100000 | 8.78270000   | 0.00000000 |
| 122 | 1252.75980000 | 4.50720000   | 0.00000000 |
| 123 | 1261.72210000 | 1.66920000   | 0.00000000 |
| 124 | 1265.18760000 | 7.99010000   | 0.00000000 |



|     |               |              |            |
|-----|---------------|--------------|------------|
| 125 | 1267.89850000 | 25.52580000  | 0.00000000 |
| 126 | 1276.67930000 | 224.31330000 | 0.00000000 |
| 127 | 1279.71260000 | 21.01370000  | 0.00000000 |
| 128 | 1279.86530000 | 9.08680000   | 0.00000000 |
| 129 | 1308.03700000 | 40.32120000  | 0.00000000 |
| 130 | 1311.25480000 | 35.96200000  | 0.00000000 |
| 131 | 1323.02090000 | 2.49670000   | 0.00000000 |
| 132 | 1323.62810000 | 2.58600000   | 0.00000000 |
| 133 | 1327.50630000 | 13.83060000  | 0.00000000 |
| 134 | 1334.06600000 | 1.48590000   | 0.00000000 |
| 135 | 1341.25220000 | 2.32190000   | 0.00000000 |
| 136 | 1345.75990000 | 2.48950000   | 0.00000000 |
| 137 | 1348.98860000 | 98.66320000  | 0.00000000 |
| 138 | 1359.95550000 | 12.69200000  | 0.00000000 |
| 139 | 1367.75590000 | 1.96710000   | 0.00000000 |
| 140 | 1369.76570000 | 20.00530000  | 0.00000000 |
| 141 | 1370.05360000 | 16.35610000  | 0.00000000 |
| 142 | 1393.34940000 | 28.13500000  | 0.00000000 |
| 143 | 1396.10920000 | 41.27410000  | 0.00000000 |
| 144 | 1399.81460000 | 5.78090000   | 0.00000000 |
| 145 | 1401.00900000 | 3.72420000   | 0.00000000 |
| 146 | 1418.22880000 | 430.62680000 | 0.00000000 |
| 147 | 1420.31200000 | 307.15830000 | 0.00000000 |
| 148 | 1466.47970000 | 0.36850000   | 0.00000000 |
| 149 | 1471.61460000 | 4.73260000   | 0.00000000 |
| 150 | 1476.18740000 | 7.67530000   | 0.00000000 |
| 151 | 1481.40370000 | 5.36250000   | 0.00000000 |
| 152 | 1484.41880000 | 3.08280000   | 0.00000000 |
| 153 | 1485.10950000 | 9.53980000   | 0.00000000 |
| 154 | 1485.29400000 | 1.09130000   | 0.00000000 |
| 155 | 1486.64760000 | 39.96220000  | 0.00000000 |
| 156 | 1490.57190000 | 27.25050000  | 0.00000000 |
| 157 | 1494.05260000 | 17.06730000  | 0.00000000 |
| 158 | 1495.20510000 | 15.23600000  | 0.00000000 |
| 159 | 1499.25930000 | 1.38810000   | 0.00000000 |
| 160 | 1503.15920000 | 50.27680000  | 0.00000000 |
| 161 | 1508.30950000 | 17.94440000  | 0.00000000 |
| 162 | 1511.08270000 | 191.27020000 | 0.00000000 |
| 163 | 1517.31640000 | 5.16180000   | 0.00000000 |
| 164 | 1518.83490000 | 9.64790000   | 0.00000000 |
| 165 | 1520.84610000 | 93.00810000  | 0.00000000 |
| 166 | 1524.70940000 | 11.61580000  | 0.00000000 |
| 167 | 1528.13610000 | 0.07850000   | 0.00000000 |
| 168 | 1570.34140000 | 20.34170000  | 0.00000000 |
| 169 | 1620.22300000 | 90.18540000  | 0.00000000 |
| 170 | 1628.46460000 | 307.13330000 | 0.00000000 |
| 171 | 1641.11910000 | 121.67340000 | 0.00000000 |
| 172 | 1669.56360000 | 697.86850000 | 0.00000000 |
| 173 | 2961.00730000 | 98.03250000  | 0.00000000 |
| 174 | 2983.88190000 | 105.51700000 | 0.00000000 |
| 175 | 3004.46020000 | 93.90670000  | 0.00000000 |
| 176 | 3007.54570000 | 130.58680000 | 0.00000000 |
| 177 | 3029.89520000 | 88.56620000  | 0.00000000 |
| 178 | 3037.14440000 | 18.94390000  | 0.00000000 |
| 179 | 3037.46000000 | 68.25370000  | 0.00000000 |
| 180 | 3038.36370000 | 30.87930000  | 0.00000000 |
| 181 | 3044.74070000 | 30.51960000  | 0.00000000 |
| 182 | 3045.51700000 | 27.60150000  | 0.00000000 |
| 183 | 3048.05180000 | 32.81570000  | 0.00000000 |
| 184 | 3053.08440000 | 30.86980000  | 0.00000000 |
| 185 | 3055.29750000 | 85.46050000  | 0.00000000 |
| 186 | 3057.77190000 | 23.42560000  | 0.00000000 |
| 187 | 3075.77230000 | 66.14460000  | 0.00000000 |
| 188 | 3083.07560000 | 46.75430000  | 0.00000000 |

|     |              |            |           |
|-----|--------------|------------|-----------|
| 189 | 3099.3210000 | 13.4875000 | 0.0000000 |
| 190 | 3101.5684000 | 30.2090000 | 0.0000000 |
| 191 | 3101.8273000 | 23.7477000 | 0.0000000 |
| 192 | 3105.7626000 | 42.6704000 | 0.0000000 |
| 193 | 3106.9323000 | 28.4407000 | 0.0000000 |
| 194 | 3111.4690000 | 43.5788000 | 0.0000000 |
| 195 | 3114.7709000 | 72.2817000 | 0.0000000 |
| 196 | 3115.2832000 | 76.5159000 | 0.0000000 |
| 197 | 3117.9720000 | 34.5366000 | 0.0000000 |
| 198 | 3131.3813000 | 17.4935000 | 0.0000000 |
| 199 | 3138.0388000 | 30.7350000 | 0.0000000 |
| 200 | 3140.8971000 | 6.7740000  | 0.0000000 |
| 201 | 3142.1093000 | 32.9896000 | 0.0000000 |
| 202 | 3143.7990000 | 1.6073000  | 0.0000000 |
| 203 | 3146.7917000 | 28.4994000 | 0.0000000 |
| 204 | 3157.6093000 | 9.0523000  | 0.0000000 |
| 205 | 3168.1753000 | 24.5938000 | 0.0000000 |
| 206 | 3168.7005000 | 47.1003000 | 0.0000000 |
| 207 | 3175.2406000 | 57.5406000 | 0.0000000 |
| 208 | 3182.3210000 | 20.6212000 | 0.0000000 |
| 209 | 3183.5244000 | 52.4780000 | 0.0000000 |
| 210 | 3201.8152000 | 11.8051000 | 0.0000000 |
